# Supplementary material for: Access to pyrrolines and fused diaziridines by selective radical addition to homoallylic diazirines
Source: Royal Society of Chemistry journal article supplement (doi:10.1039/d3sc04886a), 2023-12-29

Supporting Information

**Access to Pyrrolines and Fused Diaziridines by Selective Radical  
Addition to Homoallylic Diazirines**

Zhigang Ma,<sup>[a]</sup> # Xinxin Wu,<sup>[a]</sup> # Haotian Li,<sup>[a]</sup> Zhu Cao,<sup>[b]</sup> and Chen Zhu\*<sup>[a,b]</sup>

# Content

|                                                              |    |
|--------------------------------------------------------------|----|
| 1. General experimental details .....                        | 3  |
| 2. Reaction parameters survey and general procedures.....    | 3  |
| 2.1 For radical-mediated trifluoromethylation (Fig 2) .....  | 3  |
| 2.2 For radical-mediated difluoroalkylation (Fig 3).....     | 4  |
| 2.3 For radical-mediated sulfonylation (Fig 3).....          | 5  |
| 2.4 For radical-mediated hydrogenation (Fig 3).....          | 6  |
| 2.5 For radical-mediated phosphinylation (Fig 4).....        | 6  |
| 2.6 For radical-mediated reductive cyclization (Fig 5) ..... | 7  |
| 3. Preparation of starting materials.....                    | 7  |
| 3.1 General method A .....                                   | 7  |
| 3.2 General method B.....                                    | 8  |
| 4. Product transformations.....                              | 9  |
| 5. Mechanistic studies .....                                 | 11 |
| 5.1 Identification of intermediates (Fig 7).....             | 11 |
| 5.2 Cyclic voltammogram experiment .....                     | 12 |
| 5.3 DFT calculations .....                                   | 13 |
| 6. References .....                                          | 14 |
| 7. Characterization of starting materials and products ..... | 14 |
| 8. NMR Spectra.....                                          | 35 |

## 1. General experimental details

All reactions were maintained under a nitrogen atmosphere unless otherwise stated. Commercially available reagents were used without further purification. DMF was distilled from NaH under reduced pressure, and THF was distilled from sodium. Infrared (FT-IR) spectra were recorded on a BRUKER VERTEX 70,  $\nu_{\max}$  in  $\text{cm}^{-1}$ .  $^1\text{H}$ -NMR spectra were recorded on a BRUKER AVANCE III HD (400 MHz) spectrometer. Chemical shifts are reported in ppm from tetramethylsilane with the solvent resonance as internal standard ( $\text{CDCl}_3$ :  $\delta$  7.26). Data are reported as follows: chemical shift, multiplicity (s = singlet, d = doublet, t = triplet, q = quadruplet, br = broad, m = multiplet), coupling constants (Hz) and integration.  $^{13}\text{C}$ -NMR spectra were recorded on a BRUKER AVANCE III HD (100 MHz) spectrometer with complete proton decoupling. Chemical shifts are reported in ppm from tetramethylsilane with the solvent resonance as the internal standard ( $\text{CDCl}_3$ :  $\delta$  77.16).  $^{19}\text{F}$ -NMR spectra were recorded on a BRUKER AVANCE III HD (376 MHz) spectrometer,  $^{31}\text{P}$ -NMR spectra were recorded on a BRUKER AVANCE III HD (162 MHz) spectrometer. High resolution mass spectrometry (HRMS) was measured with a GCT Premier<sup>TM</sup> and BRUKER micrOTF-Q III. Melting points were measured using INESA WRR and values are uncorrected.

## 2. Reaction parameters survey and general procedures

### 2.1 For radical-mediated trifluoromethylation (Fig 2)

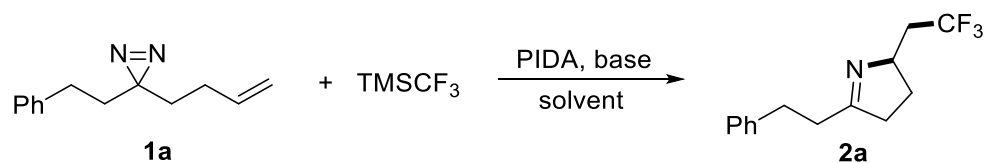

| Entry             | Base                            | Solvent | T (°C) | Yield <sup>[a]</sup> |
|-------------------|---------------------------------|---------|--------|----------------------|
| 1                 | CsF                             | MeCN    | 0      | 71%                  |
| 2                 | CsF                             | THF     | 0      | 9%                   |
| 3                 | CsF                             | DCM     | 0      | trace                |
| 4                 | CsF                             | MeOH    | 0      | nr                   |
| 5                 | CsF                             | acetone | 0      | trace                |
| 6                 | CsF                             | EA      | 0      | 15%                  |
| 7                 | CsF                             | DMF     | 0      | 40%                  |
| 8                 | CsF                             | MeCN    | -10    | 62%                  |
| 9 <sup>[b]</sup>  | CsF                             | MeCN    | 0      | 70%                  |
| 10 <sup>[c]</sup> | KF                              | MeCN    | rt     | 52%                  |
| 11                | Cs <sub>2</sub> CO <sub>3</sub> | MeCN    | rt     | 15%                  |

|    |     |      |   |                      |
|----|-----|------|---|----------------------|
| 12 | CsF | MeCN | 0 | trace <sup>[d]</sup> |
| 13 | CsF | MeCN | 0 | 27% <sup>[e]</sup>   |

**Table S1.** Reaction conditions: **1a** (0.2 mmol), TMSCF<sub>3</sub> (0.6 mmol), (diacetoxyiodo)benzene (PIDA, 0.3 mmol) and base (0.3 mmol) in dry solvent (2.0 mL) were stirred vigorously (1300 rpm) under Ar atmosphere at indicated temperature for 1 h. [a] Yields of isolated product are given. [b] 3.0 mL MeCN. [c] Reaction for 12 h. [d] With 0.2 mmol of TMSCF<sub>3</sub>. [e] With 0.4 mmol of TMSCF<sub>3</sub>.

### General procedure for the synthesis of **2**

To a suspension of diazirine **1** (0.2 mmol), CsF (1.5 equiv., 45.6 mg) and PIDA (1.5 equiv., 96.6 mg) in dry acetonitrile (2.0 mL) was added TMSCF<sub>3</sub> (3.0 equiv, 88.6  $\mu$ L) dropwise at 0 °C. After the reaction mixture was stirred vigorously (1200 rpm) for 1 h at the same temperature, the reaction was quenched with water. The aqueous layer was extracted with EtOAc. The combined organic extracts were washed with brine and dried over anhydrous Na<sub>2</sub>SO<sub>4</sub>. After removal of solvents in vacuo, pyrroline **2** was isolated by flash column chromatography on silica gel.

### 2.2 For radical-mediated difluoroalkylation (Fig 3)

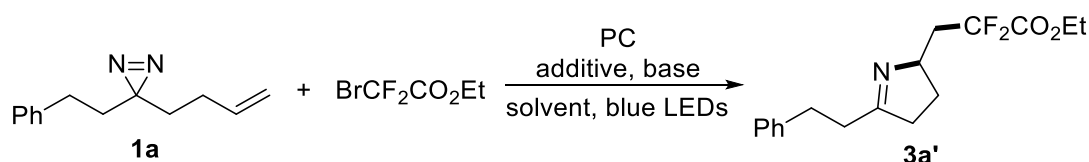

| Entry            | [Ir]                                           | Base                            | Additive | Solvent                      | Yield <sup>[a]</sup> |
|------------------|------------------------------------------------|---------------------------------|----------|------------------------------|----------------------|
| 1 <sup>[b]</sup> | <i>fac</i> -Ir(ppy) <sub>3</sub>               | -                               | DIPEA    | MeCN                         | 13%                  |
| 2 <sup>[b]</sup> | <i>fac</i> -Ir(ppy) <sub>3</sub>               | -                               | HE       | MeCN                         | 33%                  |
| 3 <sup>[b]</sup> | <i>fac</i> -Ir(ppy) <sub>3</sub>               | K <sub>2</sub> HPO <sub>4</sub> | HE       | MeCN/H <sub>2</sub> O (10:1) | 20%                  |
| 4                | <i>fac</i> -Ir(ppy) <sub>3</sub>               | K <sub>2</sub> HPO <sub>4</sub> | HE       | MeCN                         | 48%                  |
| 5                | [Ir(ppy) <sub>2</sub> (dtbbpy)]PF <sub>6</sub> | K <sub>2</sub> HPO <sub>4</sub> | HE       | MeCN                         | 60%                  |
| 6                | Eosin Y                                        | K <sub>2</sub> HPO <sub>4</sub> | HE       | MeCN                         | trace                |
| 7                | Eosin Y-Na <sub>2</sub>                        | K <sub>2</sub> HPO <sub>4</sub> | HE       | MeCN                         | trace                |
| 8                | <i>fac</i> -Ir(ppy) <sub>3</sub>               | K <sub>2</sub> CO <sub>3</sub>  | HE       | MeCN                         | 41%                  |
| 9                | <i>fac</i> -Ir(ppy) <sub>3</sub>               | K <sub>3</sub> PO <sub>4</sub>  | HE       | MeCN                         | 34%                  |
| 10               | <i>fac</i> -Ir(ppy) <sub>3</sub>               | KH <sub>2</sub> PO <sub>4</sub> | HE       | MeCN                         | 24%                  |

**Table S2.** Reaction conditions: **1a** (0.2 mmol), ethyl bromodifluoroacetate (0.4 mmol), PC (2 mol %), additive (0.4 mmol) and base (0.4 mmol) in dry solvent (2.0 mL) under Ar atmosphere were irradiated under 5 W  $\times$  2 blue LEDs for 12 h. [a] Yields of isolated products are given. [b] 1 mol % PC was used.



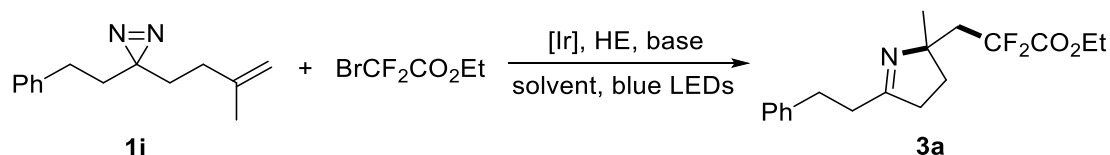

| Entry | [Ir]                                           | Base                             | Solvent                      | Yield <sup>[b]</sup> |
|-------|------------------------------------------------|----------------------------------|------------------------------|----------------------|
| 1     | <i>fac</i> -Ir(ppy) <sub>3</sub>               | K <sub>2</sub> HPO <sub>4</sub>  | MeCN/H <sub>2</sub> O (10:1) | 58%                  |
| 2     | <i>fac</i> -Ir(ppy) <sub>3</sub>               | K <sub>2</sub> HPO <sub>4</sub>  | MeCN                         | 71%                  |
| 3     | [Ir(ppy) <sub>2</sub> (dtbbpy)]PF <sub>6</sub> | K <sub>2</sub> HPO <sub>4</sub>  | MeCN                         | 67%                  |
| 4     | <i>fac</i> -Ir(ppy) <sub>3</sub>               | Na <sub>2</sub> HPO <sub>4</sub> | MeCN                         | 63%                  |
| 5     | <i>fac</i> -Ir(ppy) <sub>3</sub>               | 2,6-Lutidine                     | MeCN                         | 76%                  |

**Table S3.** Reaction conditions: **1i** (0.2 mmol), ethyl bromodifluoroacetate (0.4 mmol), PC (2 mol %), Hantzsch ester (0.4 mmol) and base (0.4 mmol) in dry solvent (2.0 mL) under Ar atmosphere were irradiated under 5 W × 2 blue LEDs for 12 h. [b] Yields of isolated product are given.

### General procedure for the synthesis of 3a-3f

To a 4-mL oven-dried reaction vial was charged with **1** (0.2 mmol), *fac*-Ir(ppy)<sub>3</sub> (2 mol %) and Hantzsch ester (HE, 2 equiv.). The reaction vial was back-flushed with argon three times. Then dry MeCN (2.0 mL), alkylbromide (2 equiv.) and 2,6-lutidine (2 equiv.) was added to the reaction vial via syringe. The reaction mixture was vigorously stirred at rt for 12 h under the irradiation with 5 W × 2 blue LEDs (approximately 5 cm away from the light sources). After removal of solvents in vacuo, pyrroline **3** was isolated by flash column chromatography on silica gel.

### 2.3 For radical-mediated sulfonylation (Fig 3)

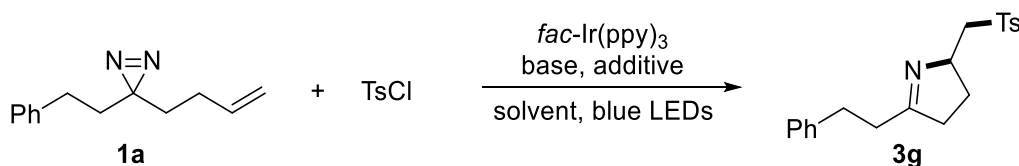

| Entry | Base                             | Additive     | Solvent                      | Yield <sup>[a]</sup> |
|-------|----------------------------------|--------------|------------------------------|----------------------|
| 1     | Na <sub>2</sub> HPO <sub>4</sub> | HE           | MeCN                         | 31%                  |
| 2     | Na <sub>2</sub> HPO <sub>4</sub> | DIPEA        | MeCN                         | 45%                  |
| 3     | K <sub>2</sub> HPO <sub>4</sub>  | DIPEA        | MeCN                         | 44%                  |
| 4     | K <sub>2</sub> HPO <sub>4</sub>  | DIPEA        | MeCN/H <sub>2</sub> O (10:1) | 79%                  |
| 5     | K <sub>2</sub> HPO <sub>4</sub>  | DABCO        | MeCN/H <sub>2</sub> O (10:1) | trace                |
| 6     | K <sub>2</sub> HPO <sub>4</sub>  | Quinuclidine | MeCN/H <sub>2</sub> O (10:1) | trace                |

**Table S4.** Reaction conditions: **1a** (0.2 mmol), TsCl (0.4 mmol), *fac*-Ir(ppy)<sub>3</sub> (2 mol %), additive (0.4 mmol) and base (0.4 mmol) in solvent (2.0 mL) under Ar atmosphere were irradiated under 5 W × 2 blue LEDs for 12 h. [a] Yields of isolated products are given.

### General procedure for the synthesis of 3g-3m

To a 4-mL reaction vial was charged with **1** (0.2 mmol), *fac*-Ir(ppy)<sub>3</sub> (2 mol %), sulfonyl chloride (2 equiv.) and K<sub>2</sub>HPO<sub>4</sub> (2 equiv.). The reaction vial was back-flushed with argon three times. Then MeCN (2.0 mL), H<sub>2</sub>O (0.2 mL) and DIPEA (2 equiv.) were added to the reaction vial via syringe. The reaction mixture was vigorously stirred at rt for 12 h under the irradiation with 5 W × 2 blue LEDs (approximately 5 cm away from the light sources). After removal of solvents in vacuo, pyrroline **3** was isolated by flash column chromatography on silica gel.

#### 2.4 For radical-mediated hydrogenation (Fig 3)

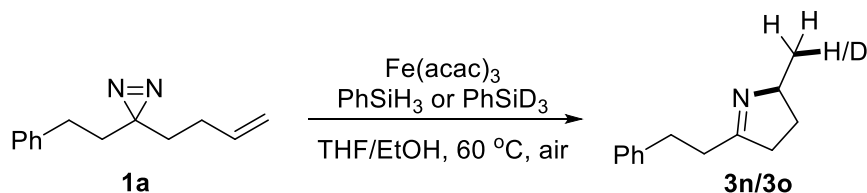

Reaction conditions: **1a** (0.2 mmol), PhSiH<sub>3</sub> or PhSiD<sub>3</sub> (0.4 mmol), Fe(acac)<sub>3</sub> (0.06 mmol) and EtOH (0.4 mmol) in THF (2.0 mL) under air at 60 °C.

#### General procedure for the synthesis of **3n** and **3o**

To a 4-mL oven-dried reaction vial was charged with **1a** (0.2 mmol), PhSiH<sub>3</sub> or PhSiD<sub>3</sub> (2 equiv.), Fe(acac)<sub>3</sub> (3 equiv.), EtOH (2 equiv.) and THF (2.0 mL). The reaction mixture was stirred at 60 °C under air. After removal of solvents in vacuo, pyrroline **3** was isolated by flash column chromatography on silica gel.

#### 2.5 For radical-mediated phosphinoylation (Fig 4)

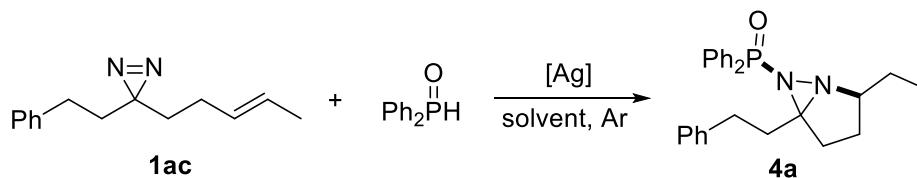

| Entry | [Ag] (mol%)                          | Solvent | T (°C) | Time (h) | Yield <sup>[a]</sup> |
|-------|--------------------------------------|---------|--------|----------|----------------------|
| 1     | AgNO <sub>3</sub> (100)              | MeCN    | 50     | 1        | 66%                  |
| 2     | AgNO <sub>3</sub> (20)               | MeCN    | 50     | 6        | 64%                  |
| 3     | AgOAc (20)                           | MeCN    | 50     | 72       | 11%                  |
| 4     | AgTFA (20)                           | MeCN    | 50     | 72       | 23%                  |
| 5     | AgOTf (20)                           | MeCN    | 50     | 72       | 44%                  |
| 6     | AgBF <sub>4</sub> (20)               | MeCN    | 50     | 72       | 40%                  |
| 7     | AgSbF <sub>6</sub> (20)              | MeCN    | 50     | 72       | 38%                  |
| 8     | Ag <sub>2</sub> O (10)               | MeCN    | 50     | 72       | trace                |
| 9     | Ag <sub>2</sub> CO <sub>3</sub> (10) | MeCN    | 50     | 72       | trace                |
| 10    | AgNO <sub>3</sub> (20)               | DMF     | 50     | 6        | 57%                  |
| 11    | AgNO <sub>3</sub> (20)               | DCE     | 50     | 6        | 61%                  |

|    |                        |                   |    |    |       |
|----|------------------------|-------------------|----|----|-------|
| 12 | AgNO <sub>3</sub> (20) | PhCF <sub>3</sub> | 50 | 6  | 71%   |
| 13 | AgNO <sub>3</sub> (20) | EA                | 50 | 6  | 69%   |
| 14 | AgNO <sub>3</sub> (20) | DMSO              | 50 | 24 | trace |
| 15 | AgNO <sub>3</sub> (20) | EA                | 40 | 4  | 72%   |
| 16 | AgNO <sub>3</sub> (20) | EA                | 30 | 4  | 75%   |
| 17 | AgNO <sub>3</sub> (10) | EA                | 30 | 5  | 79%   |
| 18 | AgNO <sub>3</sub> (5)  | EA                | 30 | 52 | 53%   |

**Table S5.** Reaction conditions: **1ad** (0.2 mmol), diphenylphosphine oxide (0.4 mmol) and silver catalyst in dry solvent (2.0 mL) under Ar atmosphere were stirred at indicated temperature. [a] Yields of isolated products are given.

### General procedure for the synthesis of **4**

To a 4-mL oven-dried reaction vial was charged with **1** (0.2 mmol), diarylphosphine oxide (2 equiv.), and AgNO<sub>3</sub> (10 mol %). The reaction vial was back-flushed with argon three times. Then dry EtOAc (2.0 mL) was added to the reaction vial via syringe, and the reaction mixture was stirred vigorously at 30 °C. After removal of solvents in vacuo, fused diaziridine **4** was isolated by flash column chromatography on silica gel.

### 2.6 For radical-mediated reductive cyclization (Fig 5)

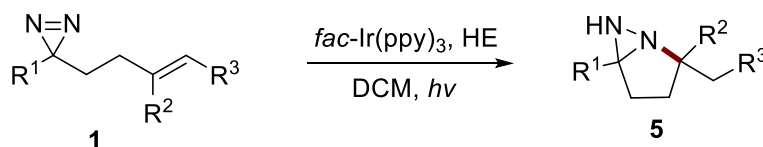

Reaction conditions: **1** (0.2 mmol), *fac*-Ir(ppy)<sub>3</sub> (0.004 mmol) and Hantzsch ester (0.4 mmol) in dry DCM (4.0 mL) under Ar irradiated with 5 W × 2 blue LEDs at rt for 4 h. Yields of isolated products are given.

### General procedure for the synthesis of **5**

To a 8-mL reaction vial was charged with **1** (0.2 mmol), *fac*-Ir(ppy)<sub>3</sub> (2 mol %), and Hantzsch ester (2 equiv.). The reaction vial was back-flushed with argon three times. Then DCM (4.0 mL) was added to the reaction vial via syringe. The reaction mixture was vigorously stirred at rt for 4 h under the irradiation of 5 W × 2 blue LEDs (approximately 5 cm away from the light sources). After removal of solvents in vacuo, fused diaziridine **5** was isolated by flash column chromatography on silica gel.

## 3. Preparation of starting materials

### 3.1 General method A

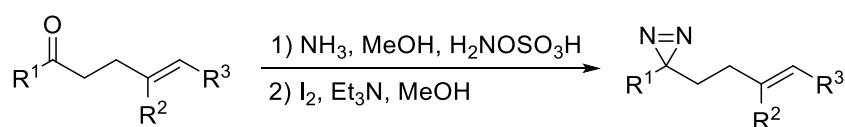

According to the reference,<sup>[1]</sup> to a flask containing corresponding acetone (10 mmol, 1.0 equiv.) was added NH<sub>3</sub> (7 M in MeOH, 15 equiv., 21.4 mL) at -10 °C. The flask was sealed and the mixture was stirred at -10 °C for 4.5 h. Then a solution of hydroxylamine-*O*-sulfonic acid (H<sub>2</sub>NOSO<sub>3</sub>H, 1.3 equiv., 1.47 g) in anhydrous MeOH (7.4 mL) was added dropwise at -10 °C and the reaction mixture was stirred at -10 °C for 1 h in a sealed flask. Subsequently, the reaction mixture was allowed to warm to room temperature and stirred for 16 h. NH<sub>3</sub> was removed by gently blowing Ar through the suspension. The precipitate was removed by filtration through celite silica gel and the precipitate was washed with several portions of anhydrous MeOH (10 mL). The organic phase was treated with Et<sub>3</sub>N (7.4 equiv., 10.3 mL) and cooled to 0 °C. I<sub>2</sub> was then added in small portions until a dark brown color persisted in the solution. And the reaction mixture was stirred at 0 °C for another 1 h to complete the oxidation of the diaziridine intermediate. The solution was then diluted with Et<sub>2</sub>O and the mixture was washed with brine. The aqueous phase was extracted with Et<sub>2</sub>O, the combined organic layer was dried over anhydrous Na<sub>2</sub>SO<sub>4</sub>, filtered and the solvent was removed under reduced pressure. The residue was purified by flash column chromatography on silica to afford the corresponding diazirine.

Substrate **1a-1d**, **1h-1af** were synthesized according to this method.

### 3.2 General method B

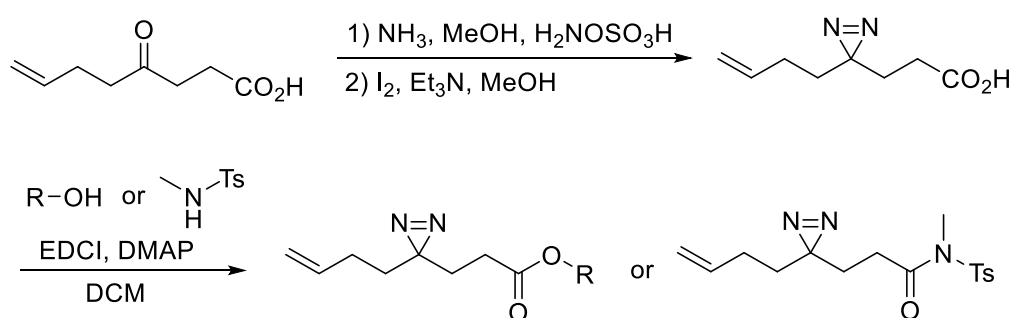

According to the references,<sup>[2]</sup> to a flask containing 4-oxooct-7-enoic acid (10 mmol, 1.00 equiv.) was added NH<sub>3</sub> (7 M in MeOH, 15 equiv., 21.4 mL) at -10 °C. The flask was sealed and the mixture was stirred at -10 °C for 4.5 h. Then a solution of hydroxylamine-*O*-sulfonic acid (H<sub>2</sub>NOSO<sub>3</sub>H, 1.3 equiv., 1.47 g) in anhydrous MeOH (7.4 mL) was added dropwise at -10 °C and the reaction mixture was stirred at -10 °C for 1 h in a sealed flask. Subsequently, the reaction mixture was allowed to warm to room temperature and stirred for 16 h. NH<sub>3</sub> was removed by gently blowing Ar through the suspension. The precipitate was removed by filtration through celite silica gel and the precipitate was washed with several portions of anhydrous MeOH (10 mL). The organic phase was treated with Et<sub>3</sub>N (7.4 equiv., 10.3 mL) and cooled to 0 °C. I<sub>2</sub> was then added in small portions until a dark brown color persisted in the solution. And the reaction mixture was stirred at 0 °C for another 1 h to complete the oxidation of the diaziridine intermediate. The solution was then diluted with Et<sub>2</sub>O and the mixture was washed with 1 M HCl and then brine. The aqueous phase was extracted with Et<sub>2</sub>O, the combined organic layer was dried over anhydrous Na<sub>2</sub>SO<sub>4</sub>, filtered and the solvent was

removed in vacuo. The residue was purified by flash column chromatography on silica gel to afford 3-(3-(but-3-en-1-yl)-3H-diazirin-3-yl)propanoic acid.

Next, to a flask containing the above 3-(3-(but-3-en-1-yl)-3H-diazirin-3-yl)propanoic acid (1.0 equiv.), DMAP (10 mol %), alcohol or amine (1.5 equiv.), DCM (0.5 M) was added 1-(3-dimethylaminopropyl)-3-ethylcarbodiimide hydrochloride (EDCI, 1.5 equiv.) at 0 °C. The reaction mixture was stirred vigorously at room temperature overnight. The solution was then diluted with DCM and the mixture was washed with water. The aqueous phase was extracted with DCM, the combined organic layer was dried over anhydrous Na<sub>2</sub>SO<sub>4</sub>, filtered and the solvent was removed under reduced pressure. The residue was purified by flash column chromatography on silica gel to afford the corresponding diazirine.

Substrates **1e-1g** were synthesized according to this method.

#### 4. Product transformations

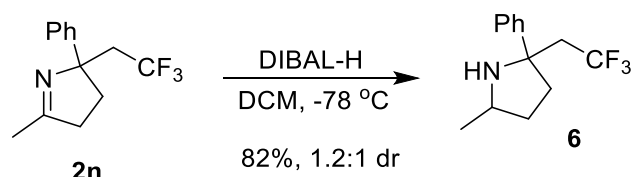

To a solution of **2n** (0.2 mmol, 48.3 mg) in DCM (2.0 mL) was added dropwise DIBAL-H (0.8 mmol, 4.0 equiv., 0.53 mL, 1.5 M in toluene) at -78 °C under N<sub>2</sub> atmosphere. The mixture was stirred at -78 °C for 4 h. The reaction was then quenched by adding a saturated NH<sub>4</sub>Cl aqueous solution and diluted with Roche salt aqueous solution. The aqueous phase was extracted with DCM and combined organic layer was dried over anhydrous Na<sub>2</sub>SO<sub>4</sub>, filtered. After removal of the solvent in vacuo, compound **6** was isolated by flash column chromatography on silica gel.

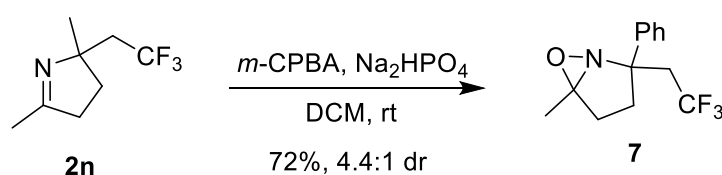

To a screw-cap vial equipped with a magnetic stirring bar were added **2n** (0.2 mmol, 48.3 mg), *m*-CPBA (0.3 mmol, 60.9 mg, 1.5 equiv.), Na<sub>2</sub>HPO<sub>4</sub> (0.3 mmol, 42.6 mg, 1.5 equiv.) and DCM (2.0 mL). The mixture was stirred at rt for 2 h. The reaction was then diluted with water, extracted with DCM, and combined organic layer was dried over anhydrous Na<sub>2</sub>SO<sub>4</sub>, filtered. The solvent was removed in vacuo, and the crude product was purified by flash column chromatography on silica gel to generate product **7**.

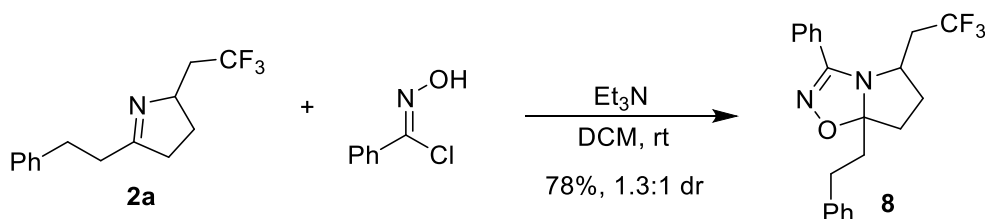

To a screw-cap vial equipped with a magnetic stirring bar were added **2a** (0.1 mmol, 25.5 mg), *N*-hydroxybenzimidoyl chloride (0.15 mmol, 23.3 mg, 1.5 equiv.),  $\text{Et}_3\text{N}$  (0.2 mmol, 28.0  $\mu\text{L}$ , 2.0 equiv.) and DCM (2.0 mL). The mixture was stirred at rt for 3 h. The solvent was removed in vacuo, and the crude product was purified by flash column chromatography on silica gel to give product **8**.

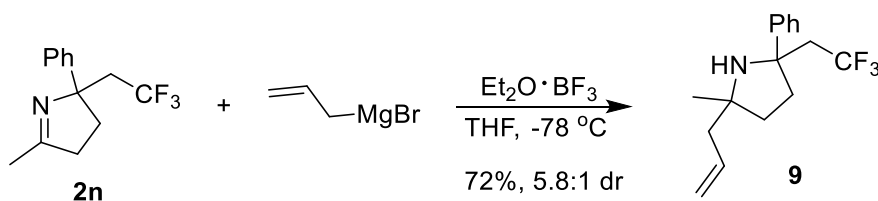

To a solution of **2n** (0.15 mmol, 48.3 mg) in THF (5.0 mL) at  $-78^\circ\text{C}$  under  $\text{N}_2$  atmosphere,  $\text{Et}_2\text{O}\cdot\text{BF}_3$  (0.45 mmol, 56.8  $\mu\text{L}$ , 3.0 equiv.) was added followed by the dropwise addition of allyl magnesium bromide (0.6 mmol, 3.0 equiv., 0.45 mL, 1.0 M in  $\text{Et}_2\text{O}$ ). The reaction mixture was stirred at  $-78^\circ\text{C}$  for 4 h and then quenched by adding a saturated  $\text{NH}_4\text{Cl}$  aqueous solution. The aqueous phase was extracted with  $\text{Et}_2\text{O}$  and combined organic layer was dried over anhydrous  $\text{Na}_2\text{SO}_4$ , filtered. After removal of the solvent in vacuo, compound **9** was isolated by flash column chromatography on silica gel.

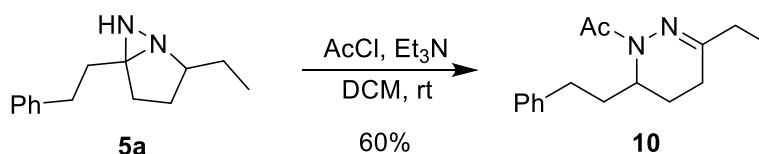

To a screw-cap vial equipped with a magnetic stirring bar were added **5a** (0.2 mmol, 43.3 mg),  $\text{Et}_3\text{N}$  (0.6 mmol, 41.6  $\mu\text{L}$ , 3.0 equiv.),  $\text{AcCl}$  (0.6 mmol, 21.3  $\mu\text{L}$ , 3.0 equiv.), and DCM (2.0 mL). The reaction mixture was stirred at rt for 3 h. The reaction was then diluted with water, extracted with DCM, and combined organic layer was dried over anhydrous  $\text{Na}_2\text{SO}_4$ , filtered. The solvent was removed in vacuo, and the crude product was purified by flash column chromatography on silica gel to give product **10**.

## 5. Mechanistic studies

### 5.1 Identification of intermediates (Fig 7)

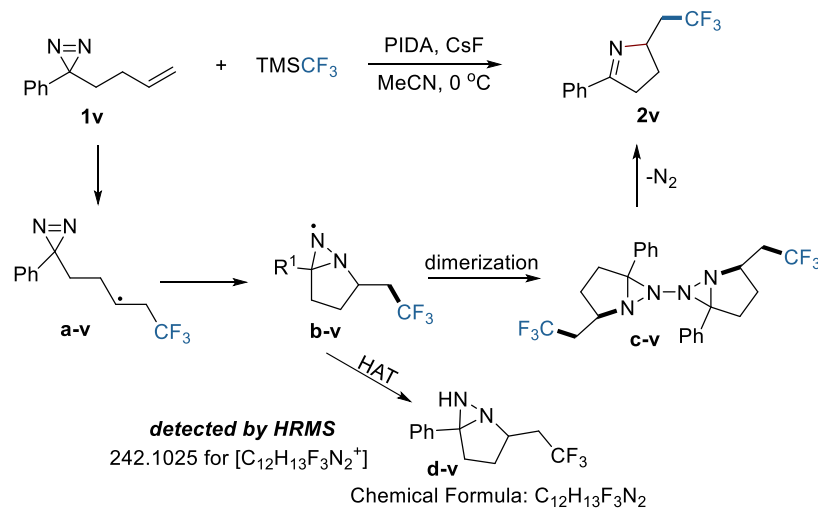

Fig. S1. Identification of intermediate.

Substrate **1v** was treated under standard conditions. After stirred under 0 °C for 5 min, the reaction mixture was used for the HRMS detection directly. Intermediate **d-v** calculated for  $[C_{12}H_{13}F_3N_2]^+$  242.1025, found 242.1036.

#### Elemental Composition Report

Page 1

#### Multiple Mass Analysis: 6 mass(es) processed - displaying only valid results

Tolerance = 30.0 PPM / DBE: min = -1.5, max = 50.0  
Element prediction: Off

Monoisotopic Mass, Odd and Even Electron Ions  
59 formula(e) evaluated with 4 results within limits (all results (up to 1000) for each mass)

Elements Used:  
C: 0-12 H: 0-13 N: 0-2 F: 0-3

DEFAULT  
MZG-3 322 (5.367)

TOF MS EI+  
2.23e+002

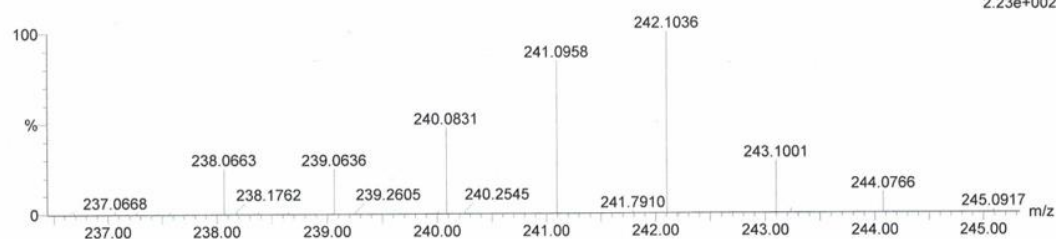

| Mass     | RA     | Calc. Mass | mDa  | PPM   | DBE | i-FIT | Formula       |
|----------|--------|------------|------|-------|-----|-------|---------------|
| 238.0663 | 25.04  | 238.0718   | -5.5 | -23.1 | 8.0 | 72.8  | C12 H9 N2 F3  |
| 240.0831 | 47.53  | 240.0874   | -4.3 | -17.9 | 7.0 | 190.0 | C12 H11 N2 F3 |
| 241.0958 | 84.11  | 241.0953   | 0.5  | 2.1   | 6.5 | 115.1 | C12 H12 N2 F3 |
| 242.1036 | 100.00 | 242.1031   | 0.5  | 2.1   | 6.0 | 19.1  | C12 H13 N2 F3 |

Fig. S2. HRMS of **d-v**.

Intermediate **5a-g** was isolated in the following reaction (standard conditions in Fig. 5).

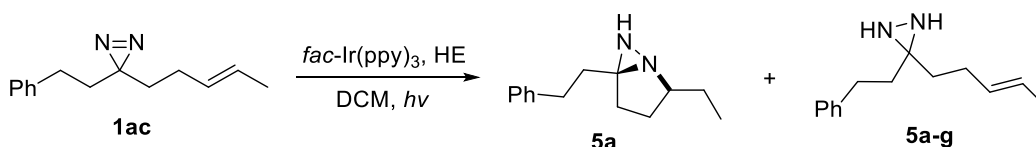

**5a-g**, colorless oil.  $^1\text{H NMR}$  (400 MHz,  $\text{CDCl}_3$ )  $\delta$  7.29-7.25 (m, 2H), 7.20-7.16 (m, 3H), 5.52-5.38 (m, 2H), 2.73-2.69 (m, 2H), 2.12 (q,  $J = 7.2$  Hz, 2H), 1.94-1.88 (m, 2H), 1.71 (q,  $J = 8.4$  Hz, 2H), 1.65 (d,  $J = 6.0$  Hz, 3H).  $^{13}\text{C NMR}$  (100 MHz,  $\text{CDCl}_3$ )  $\delta$  141.1, 129.9, 128.5, 128.1, 126.1, 125.9, 57.3, 38.1, 36.0, 30.9, 27.8, 17.8. **FT-IR**:  $\nu$  ( $\text{cm}^{-1}$ ) 2931, 1453, 1133, 965, 747, 698. **HRMS** [EI] calcd for  $\text{C}_{14}\text{H}_{20}\text{N}_2[\text{M}]^+$  216.1621, found 216.1630.

#### Elemental Composition Report

Page 1

#### Multiple Mass Analysis: 6 mass(es) processed - displaying only valid results

Tolerance = 2.0 PPM / DBE: min = -1.5, max = 50.0

Element prediction: Off

Monoisotopic Mass, Odd and Even Electron Ions

197 formula(e) evaluated with 3 results within limits (all results (up to 1000) for each mass)

Elements Used:

C: 0-14 H: 0-20 N: 0-2 80Se: 0-1 79Br: 0-1 81Br: 0-1

DEFAULT

ZQ-20231114 744 (12.404) Cm (738:745-(694:699+680:684))

TOF MS EI+  
2.44e+003

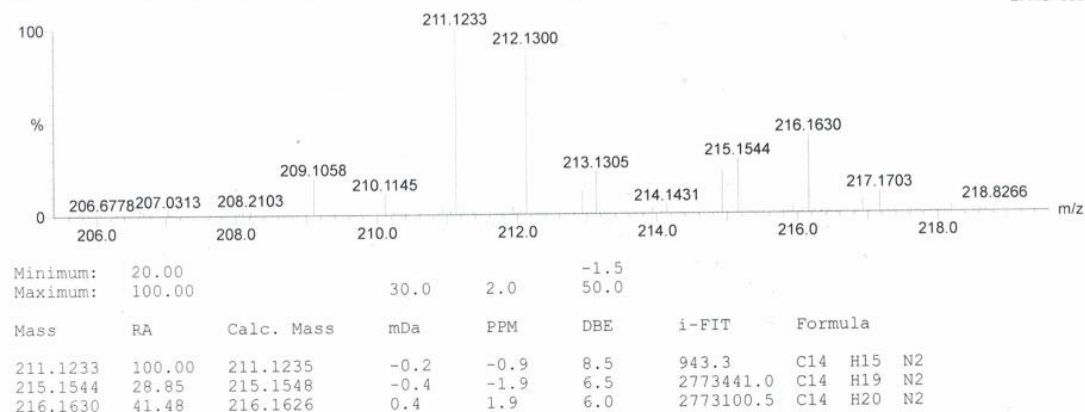

Fig. S3. HRMS of **5a-g**.

## 5.2 Cyclic voltammogram experiment

All voltammograms were taken at room temperature using a mesh platinum (Pt) counter electrode, a glassy carbon working electrode, and a saturated calomel (SCE) reference electrode. The conditions of the experiments were the following: an acetonitrile solution of 0.1 M tetrabutylammonium tetrafluoroborate ( $\text{Bu}_4\text{NBF}_4$ ) and 0.01 M **1ac**, a scan rate of 0.1 V/s, and a negative initial scan direction. The reported potentials were averages over segments, and were taken at half-height of the cathodic peaks ( $E_p/2$ ) of **1ac**, since all reductions were nonreversible.



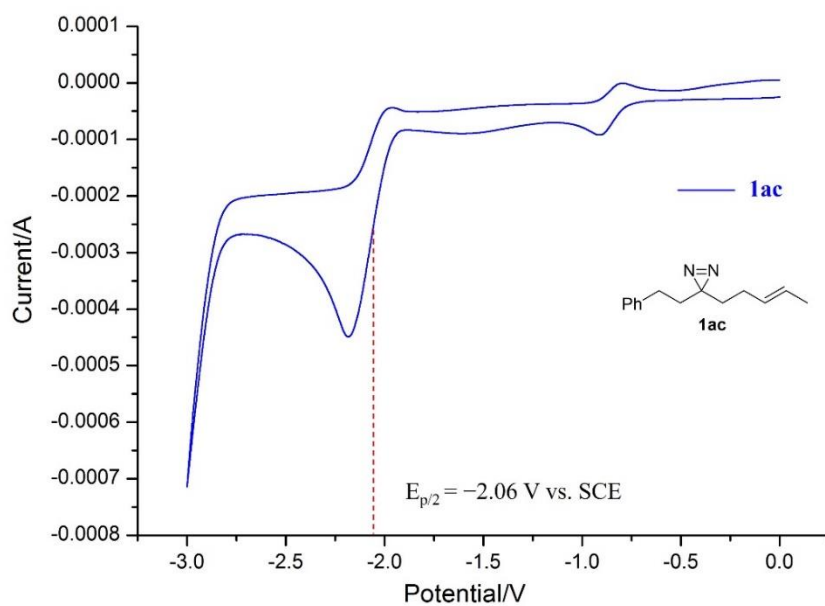

Fig. S4. cyclic voltammogram experiment.

We can conclude from the cyclic voltammogram experiment that  $E_{p/2}$  of **1ac** is -2.06 V vs. SCE.

### 5.3 DFT calculations

#### Computational methods

All theoretical calculations were performed with Gaussian 09. Geometry optimizations and frequency computations were calculated by B3LYP functional together with the 6-31G(d) basis set.

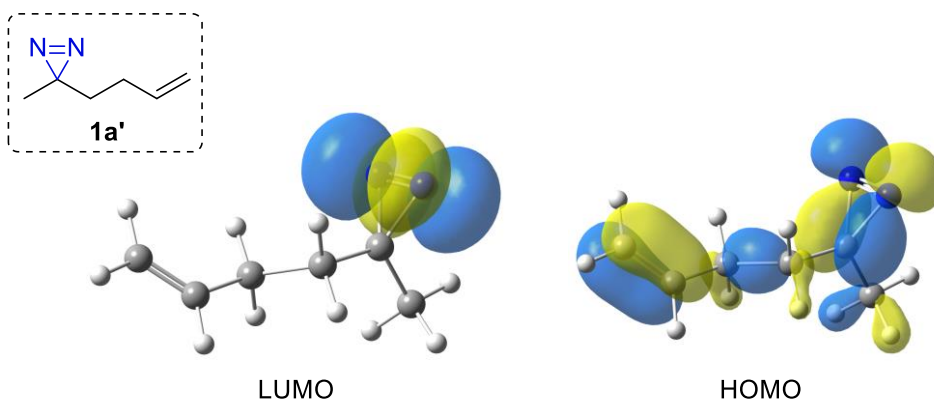

Fig. S5. LUMO and HOMO analysis of diazirine substrate

#### DFT-calculated Cartesian Coordinates.

**1a'**

C                    -0.03150400      0.07909300      -0.66827500

|   |             |             |             |
|---|-------------|-------------|-------------|
| H | -0.24006000 | -0.86786400 | -1.17950800 |
| H | -0.10042600 | 0.86890400  | -1.42975900 |
| C | -1.10734800 | 0.31265500  | 0.41814700  |
| H | -0.88173000 | 1.25038900  | 0.94724100  |
| H | -1.05210600 | -0.49041900 | 1.16312600  |
| C | -2.49580300 | 0.38621100  | -0.15644400 |
| H | -2.67160600 | 1.19145300  | -0.87257400 |
| C | -3.49140800 | -0.45222400 | 0.13259300  |
| H | -4.47435500 | -0.35233100 | -0.31998100 |
| H | -3.36230400 | -1.27080700 | 0.83811500  |
| C | 1.37997700  | 0.04965300  | -0.11845000 |
| N | 1.78686000  | -1.16215600 | 0.63546500  |
| N | 2.24124500  | -1.09137700 | -0.50960400 |
| C | 2.05968200  | 1.35258600  | 0.22913200  |
| H | 2.17628100  | 1.98003500  | -0.66377300 |
| H | 1.47576500  | 1.92191600  | 0.96267800  |
| H | 3.05223500  | 1.17560700  | 0.65319700  |

## 6. References

1. Pan, S., Jang, S.-Y., Wang, D., Liew, S. S., Li, Z., Lee, J.-S. & Yao, S. Q. A suite of “Minimalist” photo-crosslinkers for live-cell imaging and chemical proteomics: case study with BRD4 inhibitors. *Angew. Chem. Int. Ed.* 2017, **56**, 11816-11821.
2. (a) Kambe, T., Correia, B. E., Niphakis, M. J. & Cravatt, B. F. Mapping the protein interaction landscape for fully functionalized small-molecule probes in human cells. *J. Am. Chem. Soc.* **136**, 10777–10782 (2014); (b) Kleiner, P., Heydenreuter, W., Stahl, M., Korotkov, V. S. & Siebe, S. A. A Whole proteome inventory of background photocrosslinker binding. *Angew. Chem. Int. Ed.* 2017, **56**, 1396–1401.

## 7. Characterization of starting materials and products

### 7.1. Starting materials

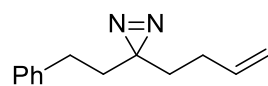

**1a**, colorless oil.  $^1\text{H NMR}$  (400 MHz,  $\text{CDCl}_3$ )  $\delta$  7.29-7.24 (m, 2H), 7.20-7.13 (m, 3H), 5.77-5.67 (m, 1H), 5.02-4.96 (m, 2H), 2.40 (t,  $J = 8.4$  Hz, 2H), 1.87-1.82 (m, 2H), 1.72-1.68 (m, 2H), 1.46 (t,  $J = 8.0$  Hz, 2H);  $^{13}\text{C NMR}$  (100 MHz,  $\text{CDCl}_3$ )  $\delta$  140.8, 137.1, 128.5, 128.3, 126.2, 115.4, 35.0, 32.4, 30.0, 28.5, 28.0. **FT-IR**:  $\nu$  ( $\text{cm}^{-1}$ ) 2923, 2855, 2360, 1583, 1497, 1453, 995, 914, 739, 697. **HRMS** [ESI] calcd for  $\text{C}_{13}\text{H}_{16}\text{N}_2\text{Na}$   $[\text{M}+\text{Na}]^+$  223.1206, found 223.1204.

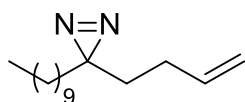

**1b**, colorless oil.  $^1\text{H NMR}$  (400 MHz,  $\text{CDCl}_3$ )  $\delta$  5.79-5.69 (m, 1H), 5.04-4.96 (m, 2H), 1.88-1.83 (m, 2H), 1.46 (t,  $J = 7.8$  Hz, 2H), 1.36 (t,  $J = 8.0$  Hz, 2H), 1.31-1.24 (m, 15H), 1.09-1.07 (m,

2H), 0.88 (t,  $J = 6.6$  Hz, 2H);  $^{13}\text{C}$  NMR (100 MHz,  $\text{CDCl}_3$ )  $\delta$  137.2, 115.2, 32.9, 32.4, 31.9, 29.5, 29.5, 29.4, 29.3, 29.2, 28.6, 28.0, 23.8, 22.7, 14.1. **FT-IR:**  $\nu$  ( $\text{cm}^{-1}$ ) 2924, 2854, 2360, 2341, 1584, 1465, 993, 913, 721. **HRMS** [ESI] calcd for  $\text{C}_{15}\text{H}_{29}\text{N}_2$  [ $\text{M}+\text{H}$ ] $^+$  237.2325, found 237.2335.

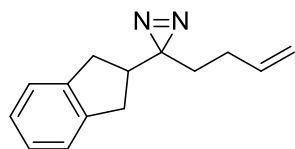

**1c**, colorless oil.  $^1\text{H}$  NMR (400 MHz,  $\text{CDCl}_3$ )  $\delta$  7.16-7.11 (m, 4H), 5.79-5.69 (m, 1H), 5.05-4.98 (m, 2H), 2.84 (dd,  $J = 14.8$ , 8.0 Hz, 2H), 2.72-2.64 (m, 1H), 2.58 (dd,  $J = 14.8$ , 8.0 Hz, 2H), 1.87-1.81 (m, 2H), 1.62-1.57 (m, 2H);  $^{13}\text{C}$  NMR (100 MHz,  $\text{CDCl}_3$ )  $\delta$  141.7, 137.0, 126.5, 124.3, 115.4, 42.5, 34.2, 31.4, 30.3, 27.8. **FT-IR:**  $\nu$  ( $\text{cm}^{-1}$ ) 2937, 2849, 2360, 2342, 1642, 1577, 1483, 1459, 996, 913, 742. **HRMS** [ESI] calcd for  $\text{C}_{14}\text{H}_{16}\text{N}_2\text{Na}$  [ $\text{M}+\text{Na}$ ] $^+$  235.1206, found 235.1205.

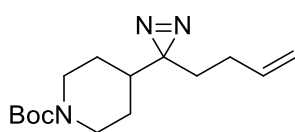

**1d**, colorless oil.  $^1\text{H}$  NMR (400 MHz,  $\text{CDCl}_3$ )  $\delta$  5.74-5.64 (m, 1H), 5.02-4.96 (m, 2H), 4.14-3.97 (m, 2H), 2.57 (t,  $J = 12.0$  Hz, 2H), 1.77-1.71 (m, 2H), 1.61-1.44 (m, 5H), 1.42 (s, 9H), 0.97-0.85 (m, 2H);  $^{13}\text{C}$  NMR (100 MHz,  $\text{CDCl}_3$ )  $\delta$  154.6, 136.9, 115.4, 79.5, 38.8, 30.6, 30.2, 28.4, 27.6, 27.1. **FT-IR:**  $\nu$  ( $\text{cm}^{-1}$ ) 2977, 2933, 2855, 1689, 1419, 1365, 1239, 1154, 1011, 914. **HRMS** [ESI] calcd for  $\text{C}_{15}\text{H}_{25}\text{N}_3\text{O}_2\text{Na}$  [ $\text{M}+\text{Na}$ ] $^+$  302.1839, found 302.1831.

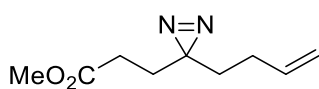

**1e**, colorless oil.  $^1\text{H}$  NMR (400 MHz,  $\text{CDCl}_3$ )  $\delta$  5.78-5.67 (m, 1H), 5.04-4.97 (m, 2H), 3.67 (s, 3H), 2.11 (t,  $J = 7.6$  Hz, 2H), 1.89-1.83 (m, 2H), 1.75 (t,  $J = 7.6$  Hz, 2H), 1.52-1.48 (m, 2H);  $^{13}\text{C}$  NMR (100 MHz,  $\text{CDCl}_3$ )  $\delta$  172.7, 136.8, 115.5, 51.8, 32.2, 28.3, 28.2, 27.9, 27.8. **FT-IR:**  $\nu$  ( $\text{cm}^{-1}$ ) 2953, 2361, 2342, 1738, 1584, 1437, 1362, 1314, 1257, 1197, 1172, 995, 915. **HRMS** [ESI] calcd for  $\text{C}_9\text{H}_{14}\text{N}_2\text{NaO}_2$  [ $\text{M}+\text{Na}$ ] $^+$  205.0947, found 205.0949.

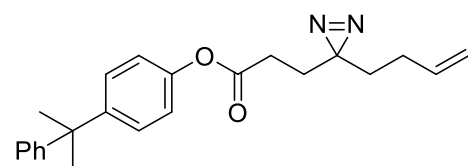

**1f**, colorless oil.  $^1\text{H}$  NMR (400 MHz,  $\text{CDCl}_3$ )  $\delta$  7.29-7.15 (m, 7H), 7.00-6.96 (m, 2H), 5.79-5.69 (m, 1H), 5.06-4.98 (m, 2H), 2.35 (t,  $J = 7.6$  Hz, 2H), 1.91-1.84 (m, 4H), 1.67 (s, 6H), 1.57-1.53 (m, 2H);  $^{13}\text{C}$  NMR (100 MHz,  $\text{CDCl}_3$ )  $\delta$  170.9, 150.2, 148.3, 136.8, 128.0, 127.8, 126.7, 125.7, 120.8, 120.7, 115.6, 42.7, 32.2, 30.8, 28.7, 28.2, 27.9, 27.8. **FT-IR:**  $\nu$  ( $\text{cm}^{-1}$ ) 2954, 2363, 2343, 1757, 1505, 1204, 1170, 1136, 1017, 914, 763, 700. **HRMS** [ESI] calcd for  $\text{C}_{23}\text{H}_{26}\text{N}_2\text{NaO}_2$  [ $\text{M}+\text{Na}$ ] $^+$  385.1886, found 385.1885.

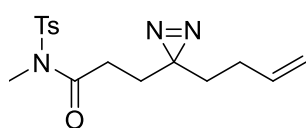

**1g**, colorless oil.  $^1\text{H}$  NMR (400 MHz,  $\text{CDCl}_3$ )  $\delta$  7.74 (d,  $J = 8.2$  Hz, 2H), 7.34 (d,  $J = 8.2$  Hz, 2H), 5.73-5.63 (m, 1H), 5.00-4.94 (m, 2H), 3.25 (s, 3H), 2.46-2.42 (m, 5H), 1.83-1.77 (m, 2H), 1.71 (t,  $J = 7.6$  Hz, 2H), 1.42 (t,  $J = 7.6$  Hz, 2H);  $^{13}\text{C}$  NMR (100 MHz,  $\text{CDCl}_3$ )  $\delta$  171.6, 145.0, 136.8, 135.9, 129.9, 127.3, 115.4, 33.0, 32.2,

30.7, 27.8, 27.7, 21.5. **FT-IR:**  $\nu$  (cm<sup>-1</sup>) 2926, 2361, 2342, 1698, 1354, 1160, 1085, 989, 917, 813, 713, 665. **HRMS** [ESI] calcd for C<sub>16</sub>H<sub>21</sub>N<sub>3</sub>NaO<sub>3</sub>S [M+Na]<sup>+</sup> 358.1196, found 358.1210.

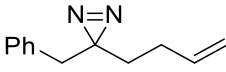 **1h**, colorless oil. **<sup>1</sup>H NMR** (400 MHz, CDCl<sub>3</sub>)  $\delta$  7.33-7.17 (m, 5H), 5.75-5.64 (m, 1H), 5.01-4.95 (m, 2H), 2.65 (s, 2H), 1.86-1.80 (m, 2H), 1.53-1.49 (m, 2H); **<sup>13</sup>C NMR** (100 MHz, CDCl<sub>3</sub>)  $\delta$  137.0, 135.4, 129.4, 128.6, 126.9, 115.4, 40.1, 31.7, 29.1, 27.8. **FT-IR:**  $\nu$  (cm<sup>-1</sup>) 2916, 2360, 1642, 1583, 1496, 1454, 1437, 995, 913, 730, 698. **HRMS** [ESI] calcd for C<sub>12</sub>H<sub>14</sub>N<sub>2</sub>Na [M+Na]<sup>+</sup> 209.1049, found 209.1058.

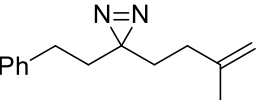 **1i**, colorless oil. **<sup>1</sup>H NMR** (400 MHz, CDCl<sub>3</sub>)  $\delta$  7.31-7.15 (m, 5H), 4.73 (s, 1H), 4.65 (s, 1H), 2.44-2.40 (m, 2H), 1.81-1.70 (m, 4H), 1.67 (s, 3H), 1.54-1.50 (m, 2H); **<sup>13</sup>C NMR** (100 MHz, CDCl<sub>3</sub>)  $\delta$  144.2, 140.8, 128.5, 128.2, 126.1, 110.5, 34.9, 31.6, 31.2, 30.0, 28.6, 22.4. **FT-IR:**  $\nu$  (cm<sup>-1</sup>) 2921, 2857, 2361, 2341, 1650, 1580, 1497, 1453, 889, 739, 697. **HRMS** [ESI] calcd for C<sub>14</sub>H<sub>18</sub>N<sub>2</sub>Na [M+Na]<sup>+</sup> 237.1362, found 237.1364.

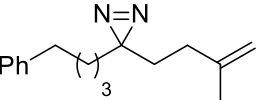 **1j**, colorless oil. **<sup>1</sup>H NMR** (400 MHz, CDCl<sub>3</sub>)  $\delta$  7.29-7.25 (m, 2H), 7.19-7.14 (m, 3H), 4.72 (s, 1H), 4.64 (s, 1H), 2.56 (t, *J* = 7.8 Hz, 2H), 1.80-1.76 (m, 2H), 1.66 (s, 3H), 1.61-1.53 (m, 2H), 1.51-1.47 (m, 2H), 1.40 (t, *J* = 7.4 Hz, 2H), 1.18-1.10 (m, 2H); **<sup>13</sup>C NMR** (100 MHz, CDCl<sub>3</sub>)  $\delta$  144.3, 142.2, 128.3, 128.3, 125.7, 110.4, 35.7, 32.7, 31.6, 31.2, 30.9, 28.6, 23.5, 22.4. **FT-IR:**  $\nu$  (cm<sup>-1</sup>) 2934, 2858, 1650, 1582, 1496, 1453, 1375, 888, 744, 698. **HRMS** [ESI] calcd for C<sub>16</sub>H<sub>22</sub>N<sub>2</sub>Na [M+Na]<sup>+</sup> 265.1675, found 265.1683.

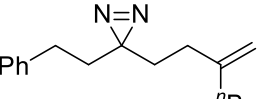 **1k**, colorless oil. **<sup>1</sup>H NMR** (400 MHz, CDCl<sub>3</sub>)  $\delta$  7.31-7.27 (m, 2H), 7.22-7.15 (m, 3H), 4.73 (s, 1H), 4.66 (s, 1H), 2.44-2.40 (m, 2H), 1.94 (t, *J* = 7.4 Hz, 2H), 1.79-1.69 (m, 4H), 1.55-1.19 (m, 2H), 1.38-1.26 (m, 4H), 0.90 (t, *J* = 7.0 Hz, 3H); **<sup>13</sup>C NMR** (100 MHz, CDCl<sub>3</sub>)  $\delta$  148.3, 140.8, 128.5, 128.2, 126.1, 109.3, 35.8, 35.0, 31.3, 30.0, 29.9, 29.8, 28.6, 22.4, 13.9. **FT-IR:**  $\nu$  (cm<sup>-1</sup>) 2955, 2928, 2859, 2361, 2342, 1646, 1582, 1454, 889, 739, 697. **HRMS** [ESI] calcd for C<sub>17</sub>H<sub>25</sub>N<sub>2</sub> [M+H]<sup>+</sup> 257.2012, found 257.2017.

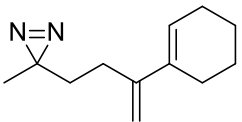 **1l**, colorless oil. **<sup>1</sup>H NMR** (400 MHz, CDCl<sub>3</sub>)  $\delta$  5.80 (t, *J* = 3.8 Hz, 1H), 4.98 (s, 1H), 4.80 (s, 1H), 2.14-2.09 (m, 6H), 1.69-1.63 (m, 2H), 1.59-1.55 (m, 2H), 1.53-1.49 (m, 2H), 1.02 (s, 3H); **<sup>13</sup>C NMR** (100 MHz, CDCl<sub>3</sub>)  $\delta$  147.1, 135.3, 124.4, 109.2, 34.0, 27.8, 26.0, 25.9, 25.8, 22.9, 22.1, 19.9. **FT-IR:**  $\nu$  (cm<sup>-1</sup>) 2927, 2859, 1604, 1448, 1384, 919, 886, 851, 803. **HRMS** [ESI] calcd for C<sub>12</sub>H<sub>18</sub>KN<sub>2</sub> [M+K]<sup>+</sup> 229.1102, found 229.1092.

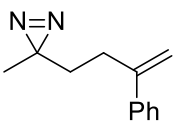 **1m**, colorless oil. **<sup>1</sup>H NMR** (400 MHz, CDCl<sub>3</sub>)  $\delta$  7.37-7.25 (m, 5H), 5.29 (s, 1H), 5.07 (q, *J* = 1.2 Hz, 1H), 2.39-2.35 (m, 2H), 1.54-1.50 (m, 2H), 1.02 (s, 3H); **<sup>13</sup>C NMR** (100 MHz, CDCl<sub>3</sub>)  $\delta$  147.1, 140.6, 128.4,

127.5, 126.0, 112.9, 33.2, 29.7, 25.7, 19.9. **FT-IR:**  $\nu$  (cm<sup>-1</sup>) 2924, 2859, 2360, 1628, 1575, 1494, 1444, 1385, 1028, 897, 777, 700. **HRMS** [ESI] calcd for C<sub>12</sub>H<sub>14</sub>N<sub>2</sub>Na [M+Na]<sup>+</sup> 209.1049, found 209.1058.

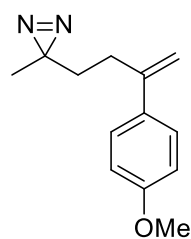

**1n**, colorless oil. **<sup>1</sup>H NMR** (400 MHz, CDCl<sub>3</sub>)  $\delta$  7.31-7.28 (m, 2H), 6.87-6.84 (m, 2H), 5.23 (s, 1H), 4.99 (d,  $J$  = 0.8 Hz, 1H), 3.81 (s, 3H), 2.34 (t,  $J$  = 8.0 Hz, 2H), 1.53-1.49 (m, 2H), 1.01 (s, 3H); **<sup>13</sup>C NMR** (100 MHz, CDCl<sub>3</sub>)  $\delta$  159.1, 146.3, 133.0, 127.1, 113.7, 111.3, 55.2, 33.2, 29.7, 25.7, 19.9. **FT-IR:**  $\nu$  (cm<sup>-1</sup>) 2952, 2837, 2361, 2342, 1608, 1511, 1456, 1287, 1246, 1179, 1033, 891, 834, 810. **HRMS** [ESI] calcd for C<sub>13</sub>H<sub>16</sub>N<sub>2</sub>NaO [M+Na]<sup>+</sup> 239.1155, found 239.1153.

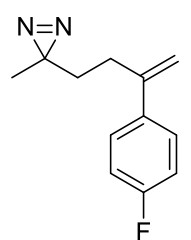

**1o**, colorless oil. **<sup>1</sup>H NMR** (400 MHz, CDCl<sub>3</sub>)  $\delta$  7.34-7.28 (m, 2H), 7.03-6.97 (m, 2H), 5.23 (s, 1H), 5.05 (d,  $J$  = 1.2 Hz, 1H), 2.35-2.31 (m, 2H), 1.52-1.48 (m, 2H), 1.00 (s, 3H); **<sup>13</sup>C NMR** (100 MHz, CDCl<sub>3</sub>)  $\delta$  162.3 (d,  $J_{C-F}$  = 244.9 Hz), 146.1, 136.7 (d,  $J_{C-F}$  = 3.4 Hz), 127.6 (d,  $J_{C-F}$  = 7.9 Hz), 115.2 (d,  $J_{C-F}$  = 21.2 Hz), 112.9, 33.1, 29.8, 25.6, 19.8; **<sup>19</sup>F NMR** (376 MHz, CDCl<sub>3</sub>)  $\delta$  -115.0 (s). **FT-IR:**  $\nu$  (cm<sup>-1</sup>) 2925, 1602, 1509, 1452, 1229, 1161, 898, 838. **HRMS** [EI] calcd for C<sub>12</sub>H<sub>13</sub>FN<sub>2</sub> [M]<sup>+</sup> 204.1057, found 204.1059.

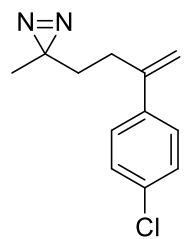

**1p**, colorless oil. **<sup>1</sup>H NMR** (400 MHz, CDCl<sub>3</sub>)  $\delta$  7.31-7.27 (m, 4H), 5.28 (s, 1H), 5.08 (d,  $J$  = 1.2 Hz, 1H), 2.33 (td,  $J$  = 8.0, 1.2 Hz, 2H), 1.52-1.48 (m, 2H), 1.01 (s, 3H); **<sup>13</sup>C NMR** (100 MHz, CDCl<sub>3</sub>)  $\delta$  146.0, 139.0, 133.3, 128.5, 127.3, 113.5, 33.1, 29.6, 25.6, 19.9. **FT-IR:**  $\nu$  (cm<sup>-1</sup>) 2949, 2924, 2360, 2342, 1492, 1096, 1012, 899, 834, 736. **HRMS** [EI] calcd for C<sub>12</sub>H<sub>13</sub>ClN<sub>2</sub> [M]<sup>+</sup> 220.0762, found 220.0769.

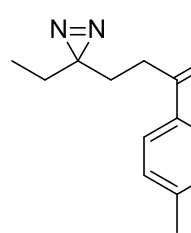

**1q**, colorless oil. **<sup>1</sup>H NMR** (400 MHz, CDCl<sub>3</sub>)  $\delta$  7.25-7.23 (m, 2H), 7.12 (d,  $J$  = 8.0 Hz, 2H), 5.25 (s, 1H), 5.00 (s, 1H), 2.34 (s, 3H), 2.31-2.25 (m, 2H), 1.56-1.50 (m, 2H), 1.42 (q,  $J$  = 7.6 Hz, 2H), 0.66 (t,  $J$  = 7.6 Hz, 3H); **<sup>13</sup>C NMR** (100 MHz, CDCl<sub>3</sub>)  $\delta$  146.9, 137.6, 137.3, 129.0, 125.8, 112.0, 31.6, 29.5, 29.4, 25.9, 21.1, 8.2. **FT-IR:**  $\nu$  (cm<sup>-1</sup>) 2970, 2923, 2360, 2342, 1626, 1576, 1514, 1457, 894, 824, 734. **HRMS** [ESI] calcd for C<sub>14</sub>H<sub>18</sub>N<sub>2</sub>Na [M+Na]<sup>+</sup> 237.1362, found 237.1370.

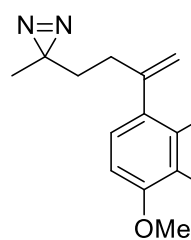

**1r**, colorless oil. **<sup>1</sup>H NMR** (400 MHz, CDCl<sub>3</sub>)  $\delta$  8.31-8.28 (m, 1H), 7.94-7.90 (m, 1H), 7.52-7.45 (m, 2H), 7.16 (d,  $J$  = 7.6 Hz, 1H), 6.77 (d,  $J$  = 7.6 Hz, 1H), 5.36 (d,  $J$  = 1.6 Hz, 1H), 5.08 (d,  $J$  = 1.6 Hz, 1H), 4.01 (s, 3H), 2.35 (t,  $J$  = 8.0 Hz, 2H), 1.52-1.48 (m, 2H), 0.98 (s, 3H); **<sup>13</sup>C NMR** (100 MHz, CDCl<sub>3</sub>)  $\delta$  154.7, 147.3, 132.7, 132.1, 126.4, 125.6, 125.3, 125.0, 125.0, 122.2, 115.9, 103.0, 55.5, 33.0, 32.9, 25.7, 19.8. **FT-IR:**  $\nu$  (cm<sup>-1</sup>) 2938, 2839, 1585, 1462, 1236, 1088, 903, 819, 765. **HRMS** [EI] calcd for C<sub>17</sub>H<sub>18</sub>N<sub>2</sub>O [M] 266.1419, found 266.1423.

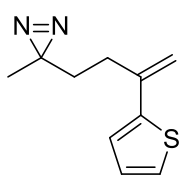

**1s**, colorless oil.  $^1\text{H NMR}$  (400 MHz,  $\text{CDCl}_3$ )  $\delta$  7.17 (d,  $J = 4.8$  Hz, 1H), 6.98-6.96 (m, 2H), 5.41 (s, 1H), 4.97 (s, 1H), 2.35 (t,  $J = 8.0$  Hz, 2H), 1.66-1.62 (m, 2H), 1.05 (s, 3H);  $^{13}\text{C NMR}$  (100 MHz,  $\text{CDCl}_3$ )  $\delta$  144.6, 140.3, 127.4, 124.3, 123.3, 111.4, 33.5, 29.7, 25.6, 19.9. **FT-IR**:  $\nu$  ( $\text{cm}^{-1}$ ) 2924, 1619, 1440, 1227, 884, 829, 695. **HRMS** [EI] calcd for  $\text{C}_{10}\text{H}_{12}\text{N}_2\text{S}$  [M] $^+$  192.0716, found 192.0724.

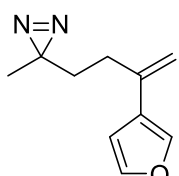

**1t**, colorless oil.  $^1\text{H NMR}$  (400 MHz,  $\text{CDCl}_3$ )  $\delta$  7.40 (s, 1H), 7.36 (t,  $J = 1.8$  Hz, 1H), 6.50-6.49 (m, 1H), 5.25 (s, 1H), 4.93 (d,  $J = 1.2$  Hz, 1H), 2.21-2.17 (m, 2H), 1.63-1.59 (m, 2H), 1.04 (s, 3H);  $^{13}\text{C NMR}$  (100 MHz,  $\text{CDCl}_3$ )  $\delta$  143.3, 138.6, 138.1, 126.3, 110.6, 108.1, 33.2, 29.0, 25.7, 19.9. **FT-IR**:  $\nu$  ( $\text{cm}^{-1}$ ) 2925, 1637, 1450, 1165, 1070, 1025, 887, 872, 790, 734. **HRMS** [ESI] calcd for  $\text{C}_{10}\text{H}_{12}\text{KN}_2\text{O}$  [M+K] $^+$  215.0581, found 215.0586.

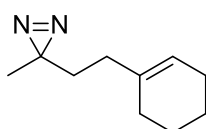

**1u**, colorless oil.  $^1\text{H NMR}$  (400 MHz,  $\text{CDCl}_3$ )  $\delta$  5.39-5.39 (m, 1H), 1.97-1.96 (m, 2H), 1.84-1.77 (m, 4H), 1.62-1.50 (m, 4H), 1.44-1.40 (m, 2H), 0.99 (s, 3H);  $^{13}\text{C NMR}$  (100 MHz,  $\text{CDCl}_3$ )  $\delta$  136.2, 121.5, 32.7, 32.1, 28.2, 25.9, 25.2, 22.9, 22.4, 19.8. **FT-IR**:  $\nu$  ( $\text{cm}^{-1}$ ) 2925, 2857, 2836, 1590, 1448, 1439, 1384, 919, 801. **HRMS** [EI] calcd for  $\text{C}_{10}\text{H}_{16}\text{N}_2$  [M] $^+$  164.1308, found 164.1311.

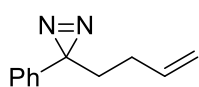

**1v**, colorless oil.  $^1\text{H NMR}$  (400 MHz,  $\text{CDCl}_3$ )  $\delta$  7.34-7.24 (m, 3H), 6.96-6.93 (m, 2H), 5.84-5.74 (m, 1H), 5.07-4.99 (m, 2H), 2.09-1.98 (m, 4H);  $^{13}\text{C NMR}$  (100 MHz,  $\text{CDCl}_3$ )  $\delta$  138.8, 136.8, 128.3, 127.4, 125.6, 115.5, 29.6, 29.0, 28.1. **FT-IR**:  $\nu$  ( $\text{cm}^{-1}$ ) 2928, 1596, 1498, 1450, 991, 912, 749, 694. **HRMS** [EI] calcd for  $\text{C}_{11}\text{H}_{12}\text{N}_2$  [M] $^+$  172.0995, found 172.0996.

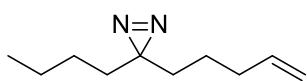

**1w**, colorless oil.  $^1\text{H NMR}$  (400 MHz,  $\text{CDCl}_3$ )  $\delta$  5.76-5.66 (m, 1H), 5.00-4.92 (m, 2H), 2.01-1.95 (m, 2H), 1.37-1.32 (m, 4H), 1.27-1.14 (m, 4H), 1.09-1.01 (m, 2H), 0.84 (t,  $J = 7.2$  Hz, 3H);  $^{13}\text{C NMR}$  (100 MHz,  $\text{CDCl}_3$ )  $\delta$  137.9, 115.0, 33.1, 32.6, 32.3, 28.7, 25.9, 23.1, 22.3, 13.8. **FT-IR**:  $\nu$  ( $\text{cm}^{-1}$ ) 2956, 2861, 1711, 1457, 1252, 1115, 911, 746. **HRMS** [ESI] calcd for  $\text{C}_{10}\text{H}_{19}\text{N}_2$  [M+H] $^+$  167.1543, found 167.1549.

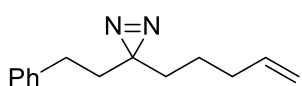

**1x**, colorless oil.  $^1\text{H NMR}$  (400 MHz,  $\text{CDCl}_3$ )  $\delta$  7.31-7.28 (m, 2H), 7.23-7.15 (m, 3H), 5.78-5.68 (m, 1H), 5.03-4.96 (m, 2H), 2.43 (t,  $J = 8.4$  Hz, 2H), 2.00 (q,  $J = 7.1$  Hz, 2H), 1.73-1.69 (m, 2H), 1.39 (t,  $J = 7.6$  Hz, 2H), 1.25-1.17 (m, 2H);  $^{13}\text{C NMR}$  (100 MHz,  $\text{CDCl}_3$ )  $\delta$  140.7, 137.8, 128.4, 128.2, 126.1, 115.1, 35.0, 33.0, 32.2, 29.9, 28.6, 23.0. **FT-IR**:  $\nu$  ( $\text{cm}^{-1}$ ) 2934, 2860, 1583, 1454, 992, 912, 736, 697. **HRMS** [ESI] calcd for  $\text{C}_{14}\text{H}_{18}\text{N}_2\text{Na}$  [M+Na] $^+$  237.1362, found 237.1365.

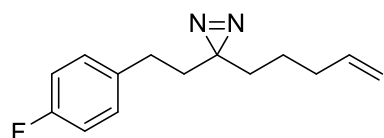

**1y**, colorless oil.  $^1\text{H NMR}$  (400 MHz,  $\text{CDCl}_3$ )  $\delta$  7.12-7.09 (m, 2H), 6.99-6.94 (m, 2H), 5.77-5.67 (m, 1H), 5.02-4.95 (m, 2H), 2.40-2.36 (m, 2H), 2.02-1.96 (m, 2H), 1.69-1.65 (m, 2H), 1.39-1.35 (m, 2H), 1.23-1.15 (m, 2H);  $^{13}\text{C NMR}$  (100 MHz,  $\text{CDCl}_3$ )  $\delta$  161.3 (d,  $J_{\text{C-F}} = 242.6$  Hz), 137.7, 136.3 (d,  $J_{\text{C-F}} = 3.3$  Hz), 129.6 (d,  $J_{\text{C-F}} = 7.8$  Hz), 115.2 (d,  $J_{\text{C-F}} = 20.1$  Hz), 115.1, 35.0, 33.0, 32.2, 29.1, 28.4, 23.0;  $^{19}\text{F NMR}$  (376 MHz,  $\text{CDCl}_3$ )  $\delta$  -117.1 (s). **FT-IR**:  $\nu$  ( $\text{cm}^{-1}$ ) 2930, 1509, 1222, 1158, 913, 825. **HRMS** [ESI] calcd for  $\text{C}_{14}\text{H}_{18}\text{FN}_2$  [ $\text{M}+\text{H}$ ] $^+$  233.1449, found 233.1450.

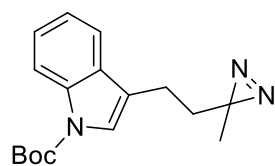

**1z**, colorless oil.  $^1\text{H NMR}$  (400 MHz,  $\text{CDCl}_3$ )  $\delta$  8.11 (d,  $J = 6.4$  Hz, 1H), 7.46 (d,  $J = 8.0$  Hz, 1H), 7.36-7.28 (m, 2H), 7.24-7.20 (m, 1H), 2.56-2.52 (m, 2H), 1.80-1.76 (m, 2H), 1.66 (s, 9H), 1.06 (s, 3H);  $^{13}\text{C NMR}$  (100 MHz,  $\text{CDCl}_3$ )  $\delta$  149.7, 135.5, 130.2, 124.4, 122.4, 122.3, 119.5, 118.7, 115.3, 83.4, 33.9, 28.2, 25.7, 19.9, 19.4. **FT-IR**:  $\nu$  ( $\text{cm}^{-1}$ ) 2979, 1728, 1452, 1369, 1253, 1154, 1082, 766, 743. **HRMS** [ESI] calcd for  $\text{C}_{17}\text{H}_{21}\text{N}_3\text{NaO}_2$  [ $\text{M}+\text{Na}$ ] $^+$  322.1526, found 322.1516.

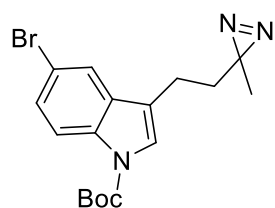

**1aa**, white solid, mp. 75-76 °C.  $^1\text{H NMR}$  (400 MHz,  $\text{CDCl}_3$ )  $\delta$  7.98 (d,  $J = 6.4$  Hz, 1H), 7.57 (d,  $J = 1.6$  Hz, 1H), 7.40-7.35 (m, 2H), 2.50-2.46 (m, 2H), 1.79-1.75 (m, 2H), 1.66 (s, 9H), 1.06 (s, 3H);  $^{13}\text{C NMR}$  (100 MHz,  $\text{CDCl}_3$ )  $\delta$  149.3, 134.2, 131.9, 127.2, 123.5, 121.4, 118.8, 116.7, 115.8, 83.9, 33.8, 28.1, 25.6, 19.8, 19.3. **FT-IR**:  $\nu$  ( $\text{cm}^{-1}$ ) 2983, 1722, 1449, 1372, 1258, 1151, 1091, 1053, 857, 800, 766, 644. **HRMS** [ESI] calcd for  $\text{C}_{17}\text{H}_{20}\text{BrN}_3\text{NaO}_2$  [ $\text{M}+\text{Na}$ ] $^+$  400.0631, found 400.0639.

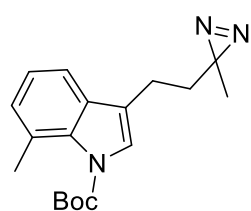

**1ab**, light brown oil.  $^1\text{H NMR}$  (400 MHz,  $\text{CDCl}_3$ )  $\delta$  7.30 (d,  $J = 6.0$  Hz, 2H), 7.19-7.11 (m, 2H), 2.64 (s, 3H), 2.56-2.52 (m, 2H), 1.80-1.76 (m, 2H), 1.65 (s, 9H), 1.08 (s, 3H);  $^{13}\text{C NMR}$  (100 MHz,  $\text{CDCl}_3$ )  $\delta$  149.5, 135.1, 131.6, 127.8, 125.6, 124.7, 122.9, 119.2, 116.2, 83.0, 34.0, 28.1, 25.7, 22.1, 19.8, 19.4. **FT-IR**:  $\nu$  ( $\text{cm}^{-1}$ ) 2977, 2930, 1741, 1343, 1252, 1220, 1153, 1045, 1028, 789, 756. **HRMS** [ESI] calcd for  $\text{C}_{18}\text{H}_{23}\text{N}_3\text{NaO}_2$  [ $\text{M}+\text{Na}$ ] $^+$  336.1682, found 336.1694.

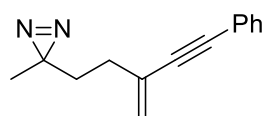

**1ac**, colorless oil.  $^1\text{H NMR}$  (400 MHz,  $\text{CDCl}_3$ )  $\delta$  7.44-7.41 (m, 2H), 7.33-7.30 (m, 3H), 5.45 (s, 1H), 5.34 (s, 1H), 2.14 (t,  $J = 8.0$  Hz, 2H), 1.68-1.64 (m, 2H), 1.06 (s, 3H);  $^{13}\text{C NMR}$  (100 MHz,  $\text{CDCl}_3$ )  $\delta$  131.6, 130.2, 128.3, 123.0, 121.9, 89.8, 88.9, 33.3, 31.7, 25.5, 19.9. **FT-IR**:  $\nu$  ( $\text{cm}^{-1}$ ) 2922, 1609, 1489, 1443, 1069, 900, 754, 690. **HRMS** [EI] calcd for  $\text{C}_{14}\text{H}_{14}\text{N}_2$  [ $\text{M}$ ] 210.1157, found 210.1160.

**1ad**, colorless oil.  $^1\text{H NMR}$  (400 MHz,  $\text{CDCl}_3$ )  $\delta$  5.39 (s, 1H), 5.29 (s, 1H), 2.07 (t,  $J = 8.0$  Hz, 2H), 1.62-1.58 (m, 2H), 1.08 (s, 21H), 1.02 (s, 3H);  $^{13}\text{C NMR}$  (100 MHz,  $\text{CDCl}_3$ )  $\delta$  130.5, 122.3, 106.6, 91.0, 33.2, 31.7, 25.5, 19.9, 18.6, 11.2. **FT-IR**:  $\nu$  ( $\text{cm}^{-1}$ ) 2943, 2866, 2143, 1462, 1385, 996, 901, 881, 675, 659. **HRMS** [ESI] calcd for  $\text{C}_{17}\text{H}_{30}\text{KN}_2\text{Si}$  [ $\text{M}+\text{K}$ ] $^+$  329.1810, found 329.1809.

**1ae**, colorless oil.  $^1\text{H NMR}$  (400 MHz,  $\text{CDCl}_3$ )  $\delta$  7.29-7.24 (m, 2H), 7.20-7.12 (m, 3H), 5.46-5.38 (m, 1H), 5.34-5.28 (m, 1H), 2.40 (t,  $J = 8.2$  Hz, 2H), 1.80-1.74 (m, 2H), 1.70-1.62 (m, 5H), 1.41 (t,  $J = 8.0$  Hz, 2H);  $^{13}\text{C NMR}$  (100 MHz,  $\text{CDCl}_3$ )  $\delta$  140.8, 129.5, 128.4, 128.2, 126.1, 125.9, 35.0, 33.0, 29.9, 28.5, 26.8, 17.9. **FT-IR**:  $\nu$  ( $\text{cm}^{-1}$ ) 2919, 2855, 1582, 1496, 1453, 965, 746, 697. **HRMS** [EI] calcd for  $\text{C}_{14}\text{H}_{18}\text{N}_2$  [ $\text{M}$ ] 214.1470, found 214.1471.

**1af**, colorless oil.  $^1\text{H NMR}$  (400 MHz,  $\text{CDCl}_3$ )  $\delta$  7.28-7.24 (m, 2H), 7.18-7.15 (m, 3H), 5.50-5.43 (m, 1H), 5.39-5.32 (m, 1H), 2.66 (t,  $J = 7.8$  Hz, 2H), 2.33-2.27 (m, 2H), 1.89-1.83 (m, 2H), 1.39-1.35 (m, 2H), 0.98 (s, 3H);  $^{13}\text{C NMR}$  (100 MHz,  $\text{CDCl}_3$ )  $\delta$  141.9, 130.5, 129.2, 128.4, 128.2, 125.7, 35.9, 34.4, 34.3, 27.0, 25.6, 19.9. **FT-IR**:  $\nu$  ( $\text{cm}^{-1}$ ) 2924, 2853, 1602, 1496, 1452, 968, 745, 698. **HRMS** [ESI] calcd for  $\text{C}_{14}\text{H}_{18}\text{N}_2\text{Na}$  [ $\text{M}+\text{Na}$ ] $^+$  237.1362, found 237.1355.

**1ag**, colorless oil.  $^1\text{H NMR}$  (400 MHz,  $\text{CDCl}_3$ )  $\delta$  7.30-7.26 (m, 2H), 7.21-7.13 (m, 3H), 5.01-4.97 (m, 1H), 2.42-2.38 (m, 2H), 1.79-1.75 (m, 2H), 1.73-1.67 (m, 5H), 1.57 (s, 3H), 1.42-1.38 (m, 2H);  $^{13}\text{C NMR}$  (100 MHz,  $\text{CDCl}_3$ )  $\delta$  140.8, 132.6, 128.5, 128.2, 126.1, 122.7, 35.1, 33.1, 30.0, 28.7, 25.7, 22.4, 17.6. **FT-IR**:  $\nu$  ( $\text{cm}^{-1}$ ) 2916, 2855, 1584, 1454, 747, 697. **HRMS** [EI] calcd for  $\text{C}_{15}\text{H}_{20}\text{N}_2$  [ $\text{M}$ ] 228.1626, found 228.1621.

**1ah**, colorless oil.  $^1\text{H NMR}$  (400 MHz,  $\text{CDCl}_3$ )  $\delta$  5.54 (t,  $J = 6.4$  Hz, 1H), 2.08-2.01 (m, 4H), 1.84 (t,  $J = 8.0$  Hz, 2H), 1.74-1.68 (m, 2H), 1.48-1.39 (m, 6H), 1.00 (s, 3H);  $^{13}\text{C NMR}$  (100 MHz,  $\text{CDCl}_3$ )  $\delta$  143.1, 126.6, 34.2, 33.1, 32.7, 32.6, 28.2, 27.2, 26.7, 25.8, 19.8. **FT-IR**:  $\nu$  ( $\text{cm}^{-1}$ ) 2919, 2849, 1590, 1447, 1384, 1220, 965, 845. **HRMS** [EI] calcd for  $\text{C}_{11}\text{H}_{18}\text{N}_2$  [ $\text{M}$ ] 178.1470, found 178.1472.

## 7.2. Products

**2a**, colorless oil.  $^1\text{H NMR}$  (400 MHz,  $\text{CDCl}_3$ )  $\delta$  7.31-7.27 (m, 2H), 7.21-7.18 (m, 3H), 4.20-4.17 (m, 1H), 2.95-2.91 (m, 2H), 2.77-2.64 (m, 3H), 2.61-2.43 (m, 2H), 2.24-2.16 (m, 1H), 2.10-2.02 (m, 1H), 1.61-1.52 (m, 1H);  $^{13}\text{C NMR}$  (100 MHz,  $\text{CDCl}_3$ )  $\delta$  178.6, 141.0, 128.4, 128.2, 126.4 (q,  $J_{\text{C-F}} = 275.2$  Hz), 126.1, 66.4 (q,  $J_{\text{C-F}} = 2.7$  Hz), 40.1 (q,  $J_{\text{C-F}} = 26.8$  Hz), 38.0, 35.2, 32.6, 29.2;  $^{19}\text{F NMR}$  (376 MHz,  $\text{CDCl}_3$ )  $\delta$  -64.0



(s). **FT-IR:**  $\nu$  ( $\text{cm}^{-1}$ ) 2945, 2360, 2342, 1644, 1377, 1249, 1130, 1088, 1020, 840, 750, 699, 648. **HRMS** [ESI] calcd for  $\text{C}_{14}\text{H}_{17}\text{F}_3\text{N}$  [ $\text{M}+\text{H}$ ] $^+$  256.1308, found 256.1318.

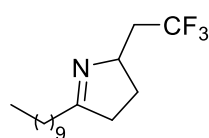

**2b**, colorless oil.  $^1\text{H NMR}$  (400 MHz,  $\text{CDCl}_3$ )  $\delta$  4.19-4.12 (m, 1H), 2.79-2.68 (m, 1H), 2.62-2.44 (m, 2H), 2.35-2.30 (m, 2H), 2.24-2.16 (m, 1H), 2.14-2.00 (m, 1H), 1.61-1.52 (m, 3H), 1.29-1.25 (m, 14H), 0.87 (t,  $J = 7.0$  Hz, 3H);  $^{13}\text{C NMR}$  (100 MHz,  $\text{CDCl}_3$ )  $\delta$  179.6, 126.4 (q,  $J_{\text{C-F}} = 275.4$  Hz), 66.3 (q,  $J_{\text{C-F}} = 2.5$  Hz), 40.1 (q,  $J_{\text{C-F}} = 26.9$  Hz), 37.5, 33.8, 31.9, 29.5, 29.5, 29.4, 29.3, 29.3, 29.2, 26.4, 22.7, 14.1;  $^{19}\text{F NMR}$  (376 MHz,  $\text{CDCl}_3$ )  $\delta$  -64.0 (s). **FT-IR:**  $\nu$  ( $\text{cm}^{-1}$ ) 2925, 2855, 2360, 2342, 1644, 1377, 1249, 1136, 1090, 841, 649. **HRMS** [ESI] calcd for  $\text{C}_{16}\text{H}_{29}\text{F}_3\text{N}$  [ $\text{M}+\text{H}$ ] $^+$  292.2247, found 292.2235.

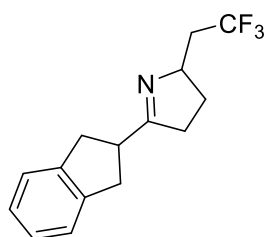

**2c**, colorless oil.  $^1\text{H NMR}$  (400 MHz,  $\text{CDCl}_3$ )  $\delta$  7.23-7.20 (m, 2H), 7.18-7.15 (m, 2H), 4.23-4.16 (m, 1H), 3.48-3.40 (m, 1H), 3.24-3.17 (m, 2H), 3.11-3.04 (m, 2H), 2.84-2.70 (m, 1H), 2.66-2.47 (m, 2H), 2.28-2.20 (m, 1H), 2.15-2.03 (m, 1H), 1.65-1.56 (m, 1H);  $^{13}\text{C NMR}$  (100 MHz,  $\text{CDCl}_3$ )  $\delta$  180.9, 142.1, 142.1, 126.5, 126.4 (q,  $J_{\text{C-F}} = 275.3$  Hz), 124.4, 66.2 (q,  $J_{\text{C-F}} = 2.6$  Hz), 43.3, 40.1 (q,  $J_{\text{C-F}} = 26.9$  Hz), 36.8, 36.8, 35.9, 29.3;  $^{19}\text{F NMR}$  (376 MHz,  $\text{CDCl}_3$ )  $\delta$  -64.0 (s). **FT-IR:**  $\nu$  ( $\text{cm}^{-1}$ ) 2946, 2361, 2342, 1637, 1377, 1249, 1136, 1089, 743, 648. **HRMS** [ESI] calcd for  $\text{C}_{15}\text{H}_{17}\text{F}_3\text{N}$  [ $\text{M}+\text{H}$ ] $^+$  268.1308, found 268.1295.

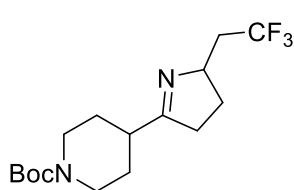

**2d**, colorless oil.  $^1\text{H NMR}$  (400 MHz,  $\text{CDCl}_3$ )  $\delta$  4.19-4.13 (m, 3H), 2.78-2.56 (m, 4H), 2.52-2.43 (m, 2H), 2.24-2.16 (m, 1H), 2.11-2.02 (m, 1H), 1.81-1.77 (m, 2H), 1.60-1.47 (m, 3H), 1.44 (s, 9H);  $^{13}\text{C NMR}$  (100 MHz,  $\text{CDCl}_3$ )  $\delta$  181.0, 154.7, 126.3 (q,  $J_{\text{C-F}} = 275.4$  Hz), 79.5, 66.2 (q,  $J_{\text{C-F}} = 2.6$  Hz), 43.6, 40.5, 40.0 (q,  $J_{\text{C-F}} = 27.0$  Hz), 35.4, 29.3, 29.2, 28.9, 28.4;  $^{19}\text{F NMR}$  (376 MHz,  $\text{CDCl}_3$ )  $\delta$  -64.0 (s). **FT-IR:**  $\nu$  ( $\text{cm}^{-1}$ ) 2976, 2934, 2361, 2342, 1688, 1423, 1366, 1250, 1165, 1138, 1090, 1012. **HRMS** [ESI] calcd for  $\text{C}_{16}\text{H}_{25}\text{F}_3\text{N}_2\text{O}_2$  [ $\text{M}+\text{Na}$ ] $^+$  357.1760, found 357.1760.

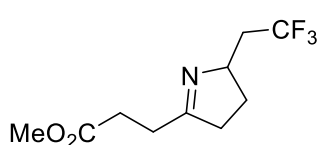

**2e**, colorless oil.  $^1\text{H NMR}$  (400 MHz,  $\text{CDCl}_3$ )  $\delta$  4.21-4.14 (m, 1H), 3.68 (s, 3H), 2.75-2.48 (m, 7H), 2.25-2.17 (m, 1H), 2.11-2.02 (m, 1H), 1.65-1.56 (m, 1H);  $^{13}\text{C NMR}$  (100 MHz,  $\text{CDCl}_3$ )  $\delta$  177.1, 173.3, 126.3 (q,  $J_{\text{C-F}} = 275.2$  Hz), 66.4 (q,  $J_{\text{C-F}} = 2.5$  Hz), 51.6, 40.0 (q,  $J_{\text{C-F}} = 26.9$  Hz), 38.1, 30.3, 29.1, 28.3;  $^{19}\text{F NMR}$  (376 MHz,  $\text{CDCl}_3$ )  $\delta$  -64.1 (s). **FT-IR:**  $\nu$  ( $\text{cm}^{-1}$ ) 2955, 1736, 1249, 1130, 1097, 1019, 840, 644. **HRMS** [ESI] calcd for  $\text{C}_{10}\text{H}_{15}\text{F}_3\text{NO}_2$  [ $\text{M}+\text{H}$ ] $^+$  238.1049, found 238.1044.

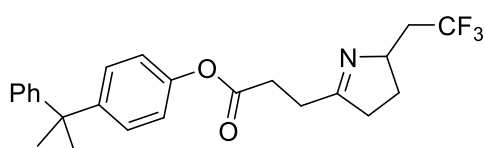

**2f**, colorless oil.  $^1\text{H NMR}$  (400 MHz,  $\text{CDCl}_3$ )  $\delta$  7.28-7.15 (m, 7H), 6.96 (d,  $J = 8.4$  Hz, 2H), 4.21-4.18 (m, 1H), 2.98-2.85 (m, 2H), 2.77-2.50 (m, 5H), 2.27-2.18 (m, 1H), 2.15-2.01 (m, 1H), 1.67 (s, 6H), 1.64-1.56 (m, 1H);  $^{13}\text{C NMR}$  (100 MHz,  $\text{CDCl}_3$ )  $\delta$  177.0, 171.6,

150.3, 148.5, 148.2, 128.0, 127.8, 126.7, 126.3 (q,  $J_{C-F} = 275.3$  Hz), 125.7, 120.7, 66.4 (q,  $J_{C-F} = 2.6$  Hz), 42.7, 40.1 (q,  $J_{C-F} = 26.9$  Hz), 38.3, 30.8, 30.7, 29.2, 28.2;  $^{19}\text{F}$  NMR (376 MHz,  $\text{CDCl}_3$ )  $\delta$  -64.0 (s). **FT-IR:**  $\nu$  ( $\text{cm}^{-1}$ ) 2970, 2360, 2342, 1756, 1505, 1250, 1205, 1170, 1133, 1017, 840, 764, 700. **HRMS** [ESI] calcd for  $\text{C}_{24}\text{H}_{26}\text{F}_3\text{NO}_2$  [ $\text{M}+\text{Na}$ ] $^+$  440.1808, found 440.1800.

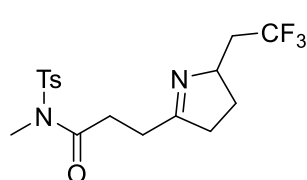

**2g**, colorless oil.  $^1\text{H}$  NMR (400 MHz,  $\text{CDCl}_3$ )  $\delta$  7.83 (d,  $J = 8.2$  Hz, 2H), 7.33 (d,  $J = 8.2$  Hz, 2H), 4.08-4.01 (m, 1H), 3.31 (s, 3H), 3.13-2.95 (m, 2H), 2.65-2.41 (m, 8H), 2.19-2.10 (m, 1H), 1.99-1.90 (m, 1H), 1.57-1.48 (m, 1H);  $^{13}\text{C}$  NMR (100 MHz,  $\text{CDCl}_3$ )  $\delta$  177.1, 172.5, 144.7, 136.2, 129.7, 127.6, 126.3 (q,  $J_{C-F} = 275.3$  Hz), 66.1 (q,  $J_{C-F} = 2.6$  Hz), 40.0 (q,  $J_{C-F} = 26.8$  Hz), 38.2, 33.0, 32.7, 29.1, 27.9, 21.5;  $^{19}\text{F}$  NMR (376 MHz,  $\text{CDCl}_3$ )  $\delta$  -64.0 (s). **FT-IR:**  $\nu$  ( $\text{cm}^{-1}$ ) 2952, 2361, 2342, 1699, 1354, 1249, 1160, 1131, 1085, 814, 711, 665. **HRMS** [ESI] calcd for  $\text{C}_{17}\text{H}_{21}\text{F}_3\text{N}_2\text{O}_3\text{S}$  [ $\text{M}+\text{Na}$ ] $^+$  413.1117, found 413.1114.

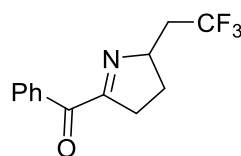

**2h'**, colorless oil (*Note:* The isolated imine **2h** was unstable, and underwent spontaneous oxidation under air during work-up to furnish **2h'**).  $^1\text{H}$  NMR (400 MHz,  $\text{CDCl}_3$ )  $\delta$  8.21-8.19 (m, 2H), 7.62-7.58 (m, 1H), 7.49-7.45 (m, 2H), 4.60-4.52 (m, 1H), 3.15-3.06 (m, 1H), 3.01-2.83 (m, 2H), 2.40-2.27 (m, 2H), 1.78-1.68 (m, 1H);  $^{13}\text{C}$  NMR (100 MHz,  $\text{CDCl}_3$ )  $\delta$  190.4, 174.2, 135.1, 133.7, 130.5, 128.4, 126.1 (q,  $J_{C-F} = 275.2$  Hz), 68.9 (q,  $J_{C-F} = 2.6$  Hz), 39.7 (q,  $J_{C-F} = 27.6$  Hz), 36.3, 28.3;  $^{19}\text{F}$  NMR (376 MHz,  $\text{CDCl}_3$ )  $\delta$  -64.0 (s). **FT-IR:**  $\nu$  ( $\text{cm}^{-1}$ ) 2953, 1659, 1249, 1144, 1130, 1089, 917, 702, 644. **HRMS** [ESI] calcd for  $\text{C}_{13}\text{H}_{13}\text{F}_3\text{NNaO}$  [ $\text{M}+\text{H}$ ] $^+$  278.0763, found 278.0770.

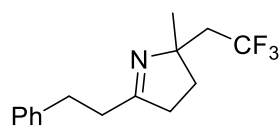

**2i**, colorless oil.  $^1\text{H}$  NMR (400 MHz,  $\text{CDCl}_3$ )  $\delta$  7.30-7.26 (m, 2H), 7.21-7.17 (m, 3H), 2.91 (t,  $J = 8.0$  Hz, 2H), 2.65-2.61 (m, 2H), 2.58-2.43 (m, 3H), 2.30-2.18 (m, 1H), 2.01-1.93 (m, 1H), 1.78-1.72 (m, 1H), 1.26 (s, 3H);  $^{13}\text{C}$  NMR (100 MHz,  $\text{CDCl}_3$ )  $\delta$  175.9, 141.0, 128.4, 128.3, 126.3 (q,  $J_{C-F} = 276.3$  Hz), 126.1, 72.4 (q,  $J_{C-F} = 1.9$  Hz), 44.1 (q,  $J_{C-F} = 26.0$  Hz), 37.8, 35.1, 34.1 (q,  $J_{C-F} = 1.4$  Hz), 32.7, 26.8;  $^{19}\text{F}$  NMR (376 MHz,  $\text{CDCl}_3$ )  $\delta$  -60.5 (s). **FT-IR:**  $\nu$  ( $\text{cm}^{-1}$ ) 2969, 2938, 1645, 1364, 1258, 1151, 1089, 1044, 748, 698, 652. **HRMS** [ESI] calcd for  $\text{C}_{15}\text{H}_{19}\text{F}_3\text{N}$  [ $\text{M}+\text{H}$ ] $^+$  270.1464, found 270.1463.

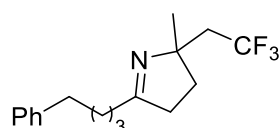

**2j**, colorless oil.  $^1\text{H}$  NMR (400 MHz,  $\text{CDCl}_3$ )  $\delta$  7.29-7.25 (m, 2H), 7.19-7.15 (m, 3H), 2.63 (t,  $J = 7.6$  Hz, 2H), 2.58-2.44 (m, 3H), 2.35-2.21 (m, 3H), 2.02-1.94 (m, 1H), 1.79-1.72 (m, 1H), 1.70-1.57 (m, 4H), 1.27 (s, 3H);  $^{13}\text{C}$  NMR (100 MHz,  $\text{CDCl}_3$ )  $\delta$  176.6, 142.3, 128.3, 128.3, 126.3 (q,  $J_{C-F} = 276.3$  Hz), 125.7, 72.2 (q,  $J_{C-F} = 1.7$  Hz), 44.2 (q,  $J_{C-F} = 25.9$  Hz), 37.3, 35.6, 34.0 (q,  $J_{C-F} = 1.6$  Hz), 33.5, 31.1, 26.9 (q,  $J_{C-F} = 1.3$  Hz), 26.1;  $^{19}\text{F}$  NMR (376 MHz,  $\text{CDCl}_3$ )  $\delta$  -60.5 (s). **FT-IR:**  $\nu$  ( $\text{cm}^{-1}$ ) 2936, 2860, 1644, 1454, 1364, 1258, 1150, 1090, 839, 747, 698, 652. **HRMS** [ESI] calcd for

C<sub>17</sub>H<sub>23</sub>F<sub>3</sub>N [M+H]<sup>+</sup> 298.1777, found 298.1781.

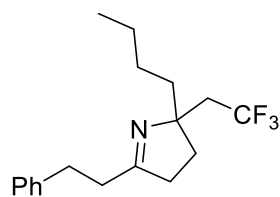

**2k**, colorless oil. <sup>1</sup>H NMR (400 MHz, CDCl<sub>3</sub>) δ 7.29-7.26 (m, 2H), 7.22-7.16 (m, 3H), 2.97-2.85 (m, 2H), 2.65 (t, *J* = 7.8 Hz, 2H), 2.56-2.42 (m, 3H), 2.35-2.22 (m, 1H), 1.96-1.89 (m, 1H), 1.82-1.75 (m, 1H), 1.64-1.49 (m, 2H), 1.32-1.23 (m, 2H), 1.21-1.10 (m, 2H), 0.88 (t, *J* = 7.2 Hz, 3H); <sup>13</sup>C NMR (100 MHz, CDCl<sub>3</sub>) δ 176.1, 141.0, 128.4, 128.2, 126.4 (q, *J*<sub>C-F</sub> = 276.6 Hz), 126.1, 75.5 (q, *J*<sub>C-F</sub> = 1.5 Hz), 42.9 (q, *J*<sub>C-F</sub> = 25.6 Hz), 40.3, 38.3, 35.0, 32.7, 31.3 (q, *J*<sub>C-F</sub> = 1.5 Hz), 25.7, 23.0, 14.0; <sup>19</sup>F NMR (376 MHz, CDCl<sub>3</sub>) δ -60.0 (s). **FT-IR**: ν (cm<sup>-1</sup>) 2957, 2932, 2863, 2361, 2342, 1648, 1456, 1366, 1256, 1143, 1109, 748, 698, 654. **HRMS** [ESI] calcd for C<sub>18</sub>H<sub>25</sub>F<sub>3</sub>N [M+H]<sup>+</sup> 312.1934, found 312.1937.

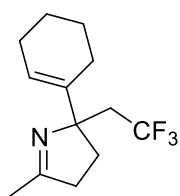

**2l**, colorless oil. <sup>1</sup>H NMR (400 MHz, CDCl<sub>3</sub>) δ 5.64-5.62 (m, 1H), 2.60-2.40 (m, 4H), 2.06-1.96 (m, 9H), 1.68-1.50 (m, 4H); <sup>13</sup>C NMR (100 MHz, CDCl<sub>3</sub>) δ 174.3, 139.7, 126.2 (q, *J*<sub>C-F</sub> = 276.9 Hz), 120.9, 78.8 (q, *J*<sub>C-F</sub> = 1.8 Hz), 41.8 (q, *J*<sub>C-F</sub> = 25.4 Hz), 38.8, 32.7 (q, *J*<sub>C-F</sub> = 1.4 Hz), 25.2, 25.1, 23.0, 22.3, 19.7; <sup>19</sup>F NMR (376 MHz, CDCl<sub>3</sub>) δ -60.6 (s). **FT-IR**: ν (cm<sup>-1</sup>) 2929, 1650, 1433, 1363, 1258, 1130, 1111. **HRMS** [ESI] calcd for C<sub>13</sub>H<sub>19</sub>F<sub>3</sub>N [M+H]<sup>+</sup> 246.1464, found 246.1463.

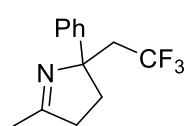

**2m**, colorless oil. <sup>1</sup>H NMR (400 MHz, CDCl<sub>3</sub>) δ 7.45-7.42 (m, 2H), 7.34-7.30 (m, 2H), 7.26-7.21 (m, 1H), 2.76-2.63 (m, 3H), 2.58-2.40 (m, 2H), 2.33-2.25 (m, 1H), 2.12 (s, 3H); <sup>13</sup>C NMR (100 MHz, CDCl<sub>3</sub>) δ 175.2, 146.3, 128.3, 126.9, 125.8 (q, *J*<sub>C-F</sub> = 277.0 Hz), 125.6, 77.8 (q, *J*<sub>C-F</sub> = 1.8 Hz), 45.6 (q, *J*<sub>C-F</sub> = 25.6 Hz), 39.2, 34.9 (q, *J*<sub>C-F</sub> = 1.6 Hz), 19.8; <sup>19</sup>F NMR (376 MHz, CDCl<sub>3</sub>) δ -60.4 (s). **FT-IR**: ν (cm<sup>-1</sup>) 2952, 2361, 2342, 1652, 1432, 1365, 1257, 1120, 1077, 1030, 762, 702. **HRMS** [ESI] calcd for C<sub>13</sub>H<sub>15</sub>F<sub>3</sub>N [M+H]<sup>+</sup> 242.1151, found 242.1149.

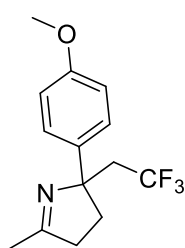

**2n**, colorless oil. <sup>1</sup>H NMR (400 MHz, CDCl<sub>3</sub>) δ 7.36 (d, *J* = 8.8 Hz, 2H), 6.86 (d, *J* = 8.8 Hz, 2H), 3.79 (s, 3H), 2.73-2.60 (m, 3H), 2.57-2.48 (m, 1H), 2.43-2.36 (m, 1H), 2.32-2.24 (m, 1H), 2.10 (s, 3H); <sup>13</sup>C NMR (100 MHz, CDCl<sub>3</sub>) δ 174.8, 158.3, 138.3, 126.7, 125.8 (q, *J*<sub>C-F</sub> = 277.0 Hz), 113.5, 77.3 55.2, 45.7 (q, *J*<sub>C-F</sub> = 25.4 Hz), 39.2, 34.9 (q, *J*<sub>C-F</sub> = 1.6 Hz), 19.8; <sup>19</sup>F NMR (376 MHz, CDCl<sub>3</sub>) δ -60.4 (s). **FT-IR**: ν (cm<sup>-1</sup>) 2956, 2361, 2342, 1652, 1510, 1365, 1244, 1179, 1120, 1033, 830, 653. **HRMS** [ESI] calcd for C<sub>14</sub>H<sub>17</sub>F<sub>3</sub>NO [M+H]<sup>+</sup> 272.1257, found 272.1254.

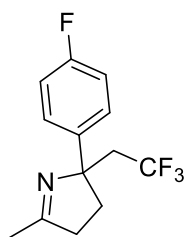

**2o**, colorless oil.  $^1\text{H NMR}$  (400 MHz,  $\text{CDCl}_3$ )  $\delta$  7.44-7.39 (m, 2H), 7.04-6.98 (m, 2H), 2.72-2.50 (m, 4H), 2.46-2.39 (m, 1H), 2.29-2.22 (m, 1H), 2.12 (s, 3H);  $^{13}\text{C NMR}$  (100 MHz,  $\text{CDCl}_3$ )  $\delta$  175.3, 161.7 (d,  $J_{\text{C-F}} = 244.0$  Hz), 141.9 (d,  $J_{\text{C-F}} = 3.0$  Hz), 127.4 (d,  $J_{\text{C-F}} = 7.9$  Hz), 125.7 (q,  $J_{\text{C-F}} = 277.0$  Hz), 115.0 (d,  $J_{\text{C-F}} = 7.9$  Hz), 77.3, 45.7 (q,  $J_{\text{C-F}} = 25.7$  Hz), 39.2, 35.1, 19.8;  $^{19}\text{F NMR}$  (376 MHz,  $\text{CDCl}_3$ )  $\delta$  -60.4 (s, 3F), -116.1 (s, 1F). **FT-IR**:  $\nu$  ( $\text{cm}^{-1}$ ) 2950, 2361, 1651, 1508, 1366, 1258, 1224, 1120, 1097, 834. **HRMS** [ESI] calcd for  $\text{C}_{13}\text{H}_{14}\text{F}_4\text{N}$   $[\text{M}+\text{H}]^+$  260.1057, found 260.1061.

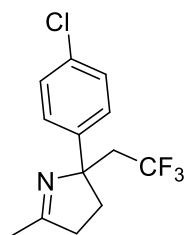

**2p**, colorless oil.  $^1\text{H NMR}$  (400 MHz,  $\text{CDCl}_3$ )  $\delta$  7.38 (d,  $J = 8.6$  Hz, 2H), 7.29 (d,  $J = 8.6$  Hz, 2H), 2.71-2.49 (m, 4H), 2.45-2.38 (m, 1H), 2.27-2.19 (m, 1H), 2.11 (s, 3H);  $^{13}\text{C NMR}$  (100 MHz,  $\text{CDCl}_3$ )  $\delta$  175.5, 144.7, 132.7, 128.4, 127.1, 125.6 (q,  $J_{\text{C-F}} = 277.0$  Hz), 77.4 (q,  $J_{\text{C-F}} = 1.4$  Hz), 45.5 (q,  $J_{\text{C-F}} = 25.8$  Hz), 39.2, 35.0 (q,  $J_{\text{C-F}} = 1.2$  Hz), 19.8;  $^{19}\text{F NMR}$  (376 MHz,  $\text{CDCl}_3$ )  $\delta$  -60.3 (s). **FT-IR**:  $\nu$  ( $\text{cm}^{-1}$ ) 2954, 2361, 2342, 1650, 1492, 1257, 1120, 1103, 1014, 829. **HRMS** [ESI] calcd for  $\text{C}_{13}\text{H}_{14}\text{ClF}_3\text{N}$   $[\text{M}+\text{H}]^+$  276.0761, found 276.0766.

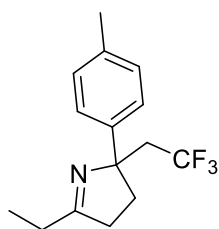

**2q**, colorless oil,  $^1\text{H NMR}$  (400 MHz,  $\text{CDCl}_3$ )  $\delta$  7.32 (d,  $J = 8.0$  Hz, 2H), 7.13 (d,  $J = 8.0$  Hz, 2H), 2.73-2.62 (m, 3H), 2.55-2.37 (m, 4H), 2.32 (s, 3H), 2.28-2.20 (m, 1H), 1.19 (t,  $J = 7.6$  Hz, 3H);  $^{13}\text{C NMR}$  (100 MHz,  $\text{CDCl}_3$ )  $\delta$  179.2, 143.8, 136.4, 128.9, 125.9 (q,  $J_{\text{C-F}} = 277.1$  Hz), 125.4, 45.6 (q,  $J_{\text{C-F}} = 25.5$  Hz), 37.1, 34.6 (q,  $J_{\text{C-F}} = 1.4$  Hz), 27.0, 20.9, 10.8;  $^{19}\text{F NMR}$  (376 MHz,  $\text{CDCl}_3$ )  $\delta$  -60.2 (s). **FT-IR**:  $\nu$  ( $\text{cm}^{-1}$ ) 2975, 2361, 2342, 1650, 1364, 1257, 1118, 812, 650. **HRMS** [ESI] calcd for  $\text{C}_{15}\text{H}_{19}\text{F}_3\text{N}$   $[\text{M}+\text{H}]^+$  270.1464, found 270.1460.

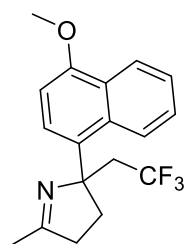

**2r**, white solid, mp. 96-97 °C.  $^1\text{H NMR}$  (400 MHz,  $\text{CDCl}_3$ )  $\delta$  8.38 (dd,  $J = 8.2, 1.0$  Hz, 1H), 8.06 (d,  $J = 8.4$  Hz, 1H), 7.77 (d,  $J = 8.0$  Hz, 1H), 7.58-7.46 (m, 2H), 6.73 (d,  $J = 8.4$  Hz, 1H), 3.99 (s, 3H), 3.22-3.10 (m, 1H), 2.95-2.74 (m, 3H), 2.64-2.56 (m, 1H), 2.43-2.35 (m, 1H), 2.20 (s, 3H);  $^{13}\text{C NMR}$  (100 MHz,  $\text{CDCl}_3$ )  $\delta$  174.2, 155.0, 135.1, 130.4, 126.8, 126.3 (q,  $J_{\text{C-F}} = 277.4$  Hz), 126.3, 124.6, 124.5, 123.9, 123.4, 102.7, 78.0 (q,  $J_{\text{C-F}} = 1.7$  Hz), 55.4, 43.9 (q,  $J_{\text{C-F}} = 25.2$  Hz), 40.1, 34.4 (q,  $J_{\text{C-F}} = 1.4$  Hz), 19.7;  $^{19}\text{F NMR}$  (376 MHz,  $\text{CDCl}_3$ )  $\delta$  -60.5 (s). **FT-IR**:  $\nu$  ( $\text{cm}^{-1}$ ) 2988, 2901, 2361, 2342, 1521, 1066, 669. **HRMS** [ESI] calcd for  $\text{C}_{18}\text{H}_{19}\text{F}_3\text{NO}$   $[\text{M}+\text{H}]^+$  322.1413, found 322.1414.

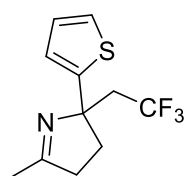

**2s**, colorless oil.  $^1\text{H NMR}$  (400 MHz,  $\text{CDCl}_3$ )  $\delta$  7.21-7.19 (m, 1H), 6.96-6.93 (m, 2H), 2.91-2.65 (m, 4H), 2.44-2.40 (m, 2H), 2.09 (s, 3H);  $^{13}\text{C NMR}$  (100 MHz,  $\text{CDCl}_3$ )  $\delta$  175.7, 149.7, 126.6, 125.5 (q,  $J_{\text{C-F}} = 276.8$  Hz), 124.3, 122.8, 76.2 (q,  $J_{\text{C-F}} = 1.8$  Hz), 46.3 (q,  $J_{\text{C-F}} = 25.8$  Hz), 39.7, 35.5 (q,  $J_{\text{C-F}} = 1.7$  Hz), 19.5;  $^{19}\text{F NMR}$  (376 MHz,  $\text{CDCl}_3$ )  $\delta$  -60.5 (s). **FT-IR**:  $\nu$  ( $\text{cm}^{-1}$ ) 2924, 2342, 1619, 1440, 1385, 1227, 884, 852, 829, 695.

**HRMS** [ESI] calcd for C<sub>11</sub>H<sub>13</sub>F<sub>3</sub>NS [M+H]<sup>+</sup> 248.0715, found 248.0710.

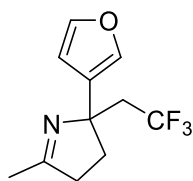

**2t**, colorless oil. <sup>1</sup>H NMR (400 MHz, CDCl<sub>3</sub>) δ 7.37 (t, *J* = 1.4 Hz, 1H), 7.30 (s, 1H), 6.39 (s, 1H), 2.83-2.71 (m, 1H), 2.68-2.55 (m, 3H), 2.27-2.19 (m, 2H), 2.06 (s, 3H); <sup>13</sup>C NMR (100 MHz, CDCl<sub>3</sub>) δ 175.0, 143.3, 138.2, 130.1, 125.8 (q, *J*<sub>C-F</sub> = 276.6 Hz), 109.0, 73.1 (q, *J*<sub>C-F</sub> = 1.8 Hz), 44.9 (q, *J*<sub>C-F</sub> = 25.8 Hz), 39.3, 34.3, 19.6; <sup>19</sup>F NMR (376 MHz, CDCl<sub>3</sub>) δ -60.4 (s). **FT-IR**: ν (cm<sup>-1</sup>) 2954, 1649, 1365, 1258, 1126, 1070, 874, 792. **HRMS** [ESI] calcd for C<sub>11</sub>H<sub>13</sub>F<sub>3</sub>NO [M+H]<sup>+</sup> 232.0944, found 232.0945.

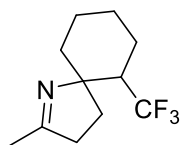

**2u**, light yellow oil. <sup>1</sup>H NMR (400 MHz, CDCl<sub>3</sub>) δ 2.59-2.45 (m, 3H), 2.16-2.09 (m, 1H), 2.01-1.97 (m, 4H), 1.84-1.59 (m, 4H), 1.41-1.29 (m, 4H); <sup>13</sup>C NMR (100 MHz, CDCl<sub>3</sub>) δ 172.4, 127.7 (q, *J*<sub>C-F</sub> = 280.6 Hz), 48.5 (q, *J*<sub>C-F</sub> = 22.9 Hz), 40.3, 38.8, 27.6 (q, *J*<sub>C-F</sub> = 1.8 Hz), 24.6, 23.6 (q, *J*<sub>C-F</sub> = 2.8 Hz), 22.6, 19.5; <sup>19</sup>F NMR (376 MHz, CDCl<sub>3</sub>) δ -65.7 (s). **FT-IR**: ν (cm<sup>-1</sup>) 2934, 2862, 1452, 1378, 1182, 1129, 1089, 1073, 732. **HRMS** [ESI] calcd for C<sub>11</sub>H<sub>17</sub>F<sub>3</sub>N [M+H]<sup>+</sup> 220.1308, found 220.1304.

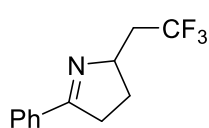

**2v**, colorless oil. <sup>1</sup>H NMR (400 MHz, CDCl<sub>3</sub>) δ 7.84-7.82 (m, 2H), 7.47-7.36 (m, 3H), 4.45-4.38 (m, 1H), 3.15-3.07 (m, 1H), 2.98-2.86 (m, 2H), 2.43-2.35 (m, 1H), 2.27-2.12 (m, 1H), 1.80-1.70 (m, 1H); <sup>13</sup>C NMR (100 MHz, CDCl<sub>3</sub>) δ 173.7, 134.0, 130.8, 128.5, 127.7, 126.4 (q, *J*<sub>C-F</sub> = 275.2 Hz), 67.0 (q, *J*<sub>C-F</sub> = 2.7 Hz), 40.2 (q, *J*<sub>C-F</sub> = 26.9 Hz), 35.4, 29.3; <sup>19</sup>F NMR (376 MHz, CDCl<sub>3</sub>) δ -64.0 (s). **FT-IR**: ν (cm<sup>-1</sup>) 2947, 2360, 1616, 1379, 1343, 1249, 1135, 1090, 1012, 761, 692, 647. **HRMS** [ESI] calcd for C<sub>12</sub>H<sub>13</sub>F<sub>3</sub>N [M+H]<sup>+</sup> 228.0995, found 228.0986.

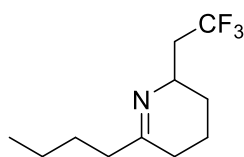

**2w**, colorless oil. <sup>1</sup>H NMR (400 MHz, CDCl<sub>3</sub>) 3.70-3.58 (m, 1H), 2.75-2.61 (m, 1H), 2.20-2.09 (m, 4H), 1.96-1.91 (m, 1H), 1.81-1.73 (m, 1H), 1.65-1.59 (m, 1H), 1.54-1.46 (m, 2H), 1.37-1.28 (m, 4H), 0.91 (t, *J* = 7.2 Hz, 3H); <sup>13</sup>C NMR (100 MHz, CDCl<sub>3</sub>) δ 172.3, 126.6 (q, *J*<sub>C-F</sub> = 275.5 Hz), 52.6 (q, *J*<sub>C-F</sub> = 2.9 Hz), 41.6 (q, *J*<sub>C-F</sub> = 26.6 Hz), 40.7, 28.8, 28.5, 27.1, 22.5, 18.4, 13.9; <sup>19</sup>F NMR (376 MHz, CDCl<sub>3</sub>) δ -63.1 (s). **FT-IR**: ν (cm<sup>-1</sup>) 2958, 2933, 1660, 1374, 1249, 1142, 1037. **HRMS** [ESI] calcd for C<sub>11</sub>H<sub>19</sub>F<sub>3</sub>N [M+H]<sup>+</sup> 222.1464, found 222.1462.

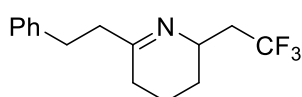

**2x**, colorless oil. <sup>1</sup>H NMR (400 MHz, CDCl<sub>3</sub>) δ 7.29-7.25 (m, 2H), 7.20-7.16 (m, 3H), 3.70-3.60 (m, 1H), 2.86 (t, *J* = 8.0 Hz, 2H), 2.69-2.55 (m, 1H), 2.49-2.45 (m, 2H), 2.15-1.98 (m, 3H), 1.95-1.88 (m, 1H), 1.79-1.70 (m, 1H), 1.63-1.52 (m, 1H), 1.26-1.15 (m, 1H); <sup>13</sup>C NMR (100 MHz, CDCl<sub>3</sub>) δ 171.0, 141.7, 128.4, 128.3, 126.6 (q, *J*<sub>C-F</sub> = 275.5 Hz), 125.9, 52.6 (q, *J*<sub>C-F</sub> = 2.8 Hz), 42.1, 41.5 (q, *J*<sub>C-F</sub> = 26.6 Hz), 32.5, 29.2, 27.1, 18.4; <sup>19</sup>F NMR (376 MHz, CDCl<sub>3</sub>) δ -63.1 (s). **FT-IR**: ν (cm<sup>-1</sup>) 2932, 1659, 1374, 1250, 1137, 1039,

749, 699. **HRMS** [ESI] calcd for C<sub>15</sub>H<sub>19</sub>F<sub>3</sub>N [M+H]<sup>+</sup> 270.1464, found 270.1469.

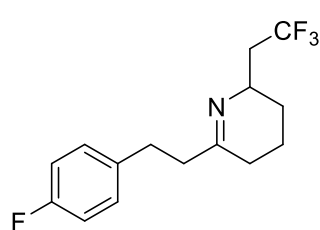

**2y**, colorless oil. <sup>1</sup>H NMR (400 MHz, CDCl<sub>3</sub>) δ 7.16-7.13 (m, 2H), 6.97-6.93 (m, 2H), 3.70-3.60 (m, 1H), 2.84 (t, *J* = 8.0 Hz, 2H), 2.69-2.55 (m, 1H), 2.47-2.43 (m, 2H), 2.16-2.02 (m, 3H), 1.94-1.90 (m, 1H), 1.79-1.72 (m, 1H), 1.64-1.53 (m, 1H), 1.29-1.19 (m, 1H); <sup>13</sup>C NMR (100 MHz, CDCl<sub>3</sub>) δ 178.8, 161.3 (d, *J*<sub>C-F</sub> = 242.1 Hz), 137.3 (d, *J*<sub>C-F</sub> = 3.1 Hz), 129.7 (d, *J*<sub>C-F</sub> = 7.8 Hz), 126.6 (q, *J*<sub>C-F</sub> = 275.5 Hz), 115.0 (d, *J*<sub>C-F</sub> = 20.9 Hz), 52.7 (q, *J*<sub>C-F</sub> = 2.8 Hz), 42.0, 41.5 (q, *J*<sub>C-F</sub> = 26.6 Hz), 31.5, 29.3, 27.1, 18.4; <sup>19</sup>F NMR (376 MHz, CDCl<sub>3</sub>) δ -63.1 (s), -117.6 (s). **FT-IR**: ν (cm<sup>-1</sup>) 2930, 1742, 1510, 1221, 1139, 1016, 824. **HRMS** [ESI] calcd for C<sub>15</sub>H<sub>18</sub>F<sub>4</sub>N [M+H]<sup>+</sup> 288.1370, found 288.1372.

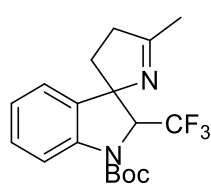

**2z**, colorless oil. <sup>1</sup>H NMR (400 MHz, CDCl<sub>3</sub>) δ 7.79-7.67 (m, 1H), 7.27-7.23 (m, 1H), 7.06-6.97 (m, 2H), 4.75 (q, *J* = 8.0 Hz, 1H), 2.97-2.88 (m, 1H), 2.81-2.73 (m, 1H), 2.61-2.53 (m, 1H), 2.49-2.42 (m, 1H), 2.06 (s, 3H), 1.56 (s, 9H); <sup>13</sup>C NMR (100 MHz, CDCl<sub>3</sub>) δ 174.2, 151.7, 141.4, 135.3, 129.3, 124.6 (q, *J*<sub>C-F</sub> = 283.2 Hz), 123.5, 121.8, 116.2, 82.4, 82.2, 68.7 (q, *J*<sub>C-F</sub> = 28.0 Hz), 40.4, 28.2 (q, *J*<sub>C-F</sub> = 2.9 Hz), 28.2, 19.6; <sup>19</sup>F NMR (376 MHz, CDCl<sub>3</sub>) δ -70.2 (s). **FT-IR**: ν (cm<sup>-1</sup>) 2927, 1709, 1483, 1253, 1164, 1126, 868, 752. **HRMS** [ESI] calcd for C<sub>18</sub>H<sub>22</sub>F<sub>3</sub>N<sub>2</sub>O<sub>2</sub> [M+H]<sup>+</sup> 355.1628, found 355.1641.

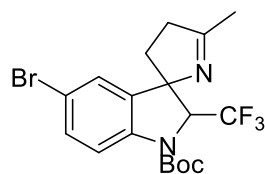

**2aa**, white solid, mp. 104-105 °C. <sup>1</sup>H NMR (400 MHz, CDCl<sub>3</sub>) δ 7.62 (d, *J* = 8.8 Hz, 1H), 7.36 (dd, *J* = 8.4, 2.0 Hz, 1H), 7.13 (d, *J* = 2.4 Hz, 1H), 4.72 (q, *J* = 8.0 Hz, 1H), 2.96-2.88 (m, 1H), 2.82-2.74 (m, 1H), 2.60-2.53 (m, 1H), 2.45-2.38 (m, 1H), 2.08 (s, 3H), 1.55 (s, 9H); <sup>13</sup>C NMR (100 MHz, CDCl<sub>3</sub>) 175.0, 151.4, 140.7, 137.4, 132.1, 125.1, 124.4 (q, *J*<sub>C-F</sub> = 288.3 Hz), 117.7, 115.8, 82.6, 82.2, 68.9 (q, *J*<sub>C-F</sub> = 29.2 Hz), 40.4, 28.1, 28.1 (q, *J*<sub>C-F</sub> = 3.5 Hz), 19.6; <sup>19</sup>F NMR (376 MHz, CDCl<sub>3</sub>) δ -70.2 (s). **FT-IR**: ν (cm<sup>-1</sup>) 2951, 1361, 1248, 1161, 1136, 1121, 891, 840, 755, 700, 688, 661. **HRMS** [ESI] calcd for C<sub>18</sub>H<sub>21</sub>BrF<sub>3</sub>N<sub>2</sub>O<sub>2</sub> [M+H]<sup>+</sup> 433.0733, found 433.0744.

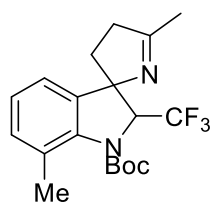

**2ab**, white solid, mp. 110-111 °C. <sup>1</sup>H NMR (400 MHz, CDCl<sub>3</sub>) δ 7.09 (d, *J* = 8.0 Hz, 1H), 7.01 (t, *J* = 7.6 Hz, 1H), 6.89 (d, *J* = 7.6 Hz, 1H), 4.77 (q, *J* = 8.4 Hz, 1H), 2.95-2.86 (m, 1H), 2.78-2.70 (m, 1H), 2.52-2.44 (m, 1H), 2.39-2.34 (m, 4H), 2.04 (s, 3H), 1.54 (s, 9H); <sup>13</sup>C NMR (100 MHz, CDCl<sub>3</sub>) 173.9, 153.7, 141.2, 137.7, 131.3, 128.9, 125.3, 124.7 (q, *J*<sub>C-F</sub> = 287.1 Hz), 119.0, 83.3, 82.0, 71.8 (q, *J*<sub>C-F</sub> = 29.1 Hz), 40.4, 28.2, 27.8 (q, *J*<sub>C-F</sub> = 2.6 Hz), 19.7, 19.6; <sup>19</sup>F NMR (376 MHz, CDCl<sub>3</sub>) δ -70.6 (s). **FT-IR**: ν (cm<sup>-1</sup>) 2926, 1712, 1464, 1370, 1250, 1156, 1126, 878. **HRMS** [ESI] calcd for C<sub>19</sub>H<sub>23</sub>F<sub>3</sub>N<sub>2</sub>NaO<sub>2</sub> [M+Na]<sup>+</sup> 391.1604, found 391.1613.

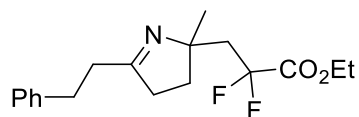

**3a**, colorless oil.  $^1\text{H NMR}$  (400 MHz,  $\text{CDCl}_3$ )  $\delta$  7.30-7.26 (m, 2H), 7.21-7.17 (m, 3H), 4.30 (q,  $J = 7.2$  Hz, 2H), 2.95-2.82 (m, 2H), 2.60-2.51 (m, 4H), 2.46-2.35 (m, 2H), 1.99-1.92 (m, 1H), 1.75-1.68 (m, 1H), 1.34 (t,  $J = 7.2$  Hz, 3H), 1.25 (s, 3H);  $^{13}\text{C NMR}$  (100 MHz,  $\text{CDCl}_3$ )  $\delta$  176.1, 164.3 (t,  $J_{\text{C-F}} = 32.3$  Hz), 141.2, 128.4, 128.2, 126.0, 115.9 (t,  $J_{\text{C-F}} = 248.8$  Hz), 77.7 (t,  $J_{\text{C-F}} = 2.8$  Hz), 62.6, 44.9 (t,  $J_{\text{C-F}} = 21.4$  Hz), 37.6, 35.2, 34.9, 32.5, 27.6 (d,  $J_{\text{C-F}} = 2.0$  Hz), 13.9;  $^{19}\text{F NMR}$  (376 MHz,  $\text{CDCl}_3$ )  $\delta$  -100.8 (d,  $J = 263.2$  Hz, 1F), -102.2 (d,  $J = 262.8$  Hz, 1F). **FT-IR**:  $\nu$  ( $\text{cm}^{-1}$ ) 2966, 2933, 1766, 1644, 1179, 1148, 1058, 750, 700. **HRMS** [ESI] calcd for  $\text{C}_{18}\text{H}_{24}\text{F}_2\text{NO}_2$  [ $\text{M}+\text{H}$ ] $^+$  324.1770, found 324.1766.

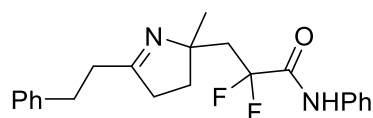

**3b**, colorless oil.  $^1\text{H NMR}$  (400 MHz,  $\text{CDCl}_3$ )  $\delta$  8.52 (s, 1H), 7.60 (d,  $J = 7.6$  Hz, 2H), 7.34 (t,  $J = 7.8$  Hz, 2H), 7.26-7.14 (m, 4H), 7.04 (d,  $J = 7.2$  Hz, 2H), 2.87-2.74 (m, 2H), 2.63-2.38 (m, 6H), 2.00-1.93 (m, 1H), 1.77-1.70 (m, 1H), 1.31 (s, 3H);  $^{13}\text{C NMR}$  (100 MHz,  $\text{CDCl}_3$ )  $\delta$  176.7, 162.4 (t,  $J_{\text{C-F}} = 28.2$  Hz), 141.1, 136.6, 129.2, 128.4, 128.2, 126.0, 125.2, 120.0, 117.8 (t,  $J_{\text{C-F}} = 252.4$  Hz), 72.5 (t,  $J_{\text{C-F}} = 2.6$  Hz), 43.9 (t,  $J_{\text{C-F}} = 21.6$  Hz), 37.5, 36.2, 35.2, 32.5, 27.8 (d,  $J_{\text{C-F}} = 2.3$  Hz);  $^{19}\text{F NMR}$  (376 MHz,  $\text{CDCl}_3$ )  $\delta$  -98.3 (d,  $J = 259.1$  Hz), -102.3 (d,  $J = 259.1$  Hz). **FT-IR**:  $\nu$  ( $\text{cm}^{-1}$ ) 2929, 2361, 1698, 1602, 1542, 1498, 1447, 1238, 1180, 1149, 1039, 751, 692. **HRMS** [ESI] calcd for  $\text{C}_{22}\text{H}_{24}\text{F}_2\text{N}_2\text{NaO}$  [ $\text{M}+\text{Na}$ ] $^+$  393.1749, found 393.1749.

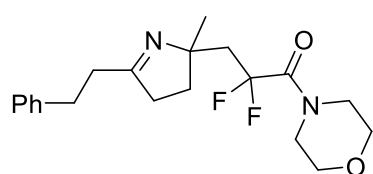

**3c**, colorless oil.  $^1\text{H NMR}$  (400 MHz,  $\text{CDCl}_3$ )  $\delta$  7.30-7.26 (m, 2H), 7.21-7.17 (m, 3H), 3.72-3.63 (m, 8H), 2.92-2.88 (m, 2H), 2.63-2.33 (m, 6H), 2.04-1.96 (m, 1H), 1.77-1.70 (m, 1H), 1.28 (s, 3H);  $^{13}\text{C NMR}$  (100 MHz,  $\text{CDCl}_3$ )  $\delta$  175.5, 162.5 (t,  $J_{\text{C-F}} = 29.0$  Hz), 141.1, 128.4, 128.2, 126.0, 119.0 (t,  $J_{\text{C-F}} = 252.5$  Hz), 73.2, 66.7, 46.7 (t,  $J_{\text{C-F}} = 5.8$  Hz), 44.2 (t,  $J_{\text{C-F}} = 21.0$  Hz), 43.4, 37.7, 35.2, 34.9, 32.7, 27.5;  $^{19}\text{F NMR}$  (376 MHz,  $\text{CDCl}_3$ )  $\delta$  -95.6 (d,  $J = 275.6$  Hz), -96.7 (d,  $J = 275.6$  Hz). **FT-IR**:  $\nu$  ( $\text{cm}^{-1}$ ) 2964, 2927, 2859, 1667, 1442, 1180, 1116, 1021, 752, 700. **HRMS** [ESI] calcd for  $\text{C}_{20}\text{H}_{27}\text{F}_2\text{N}_2\text{O}_2$  [ $\text{M}+\text{H}$ ] $^+$  365.2035, found 365.2038.

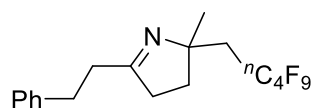

**3d**, yellow oil.  $^1\text{H NMR}$  (400 MHz,  $\text{CDCl}_3$ )  $\delta$  7.30-7.26 (m, 2H), 7.21-7.17 (m, 3H), 2.94-2.90 (m, 2H), 2.66-2.62 (m, 2H), 2.60-2.41 (m, 3H), 2.25-2.11 (m, 1H), 2.01-1.93 (m, 1H), 1.85-1.79 (m, 1H), 1.30 (d,  $J_{\text{C-F}} = 1.6$  Hz, 3H);  $^{13}\text{C NMR}$  (100 MHz,  $\text{CDCl}_3$ )  $\delta$  175.8, 140.9, 128.4, 128.3, 126.1, 73.1, 40.2 (t,  $J_{\text{C-F}} = 19.9$  Hz), 37.9, 35.0, 34.7, 32.6, 27.0 (d,  $J_{\text{C-F}} = 2.9$  Hz);  $^{19}\text{F NMR}$  (376 MHz,  $\text{CDCl}_3$ )  $\delta$  -81.1 (t,  $J = 9.6$  Hz, 3F), -110.1-113.5 (m, 2F), -124.7-124.8 (m, 2F), -125.7-125.8 (m, 2F). **FT-IR**:  $\nu$  ( $\text{cm}^{-1}$ ) 2970, 2361, 1646, 1351, 1218, 1132, 879, 737, 699. **HRMS** [ESI] calcd for  $\text{C}_{18}\text{H}_{19}\text{F}_9\text{N}$  [ $\text{M}+\text{H}$ ] $^+$  420.1368, found 420.1371.

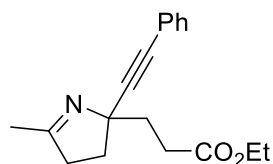

**3e**, yellow oil.  $^1\text{H NMR}$  (400 MHz,  $\text{CDCl}_3$ )  $\delta$  7.43-7.40 (m, 2H), 7.28-7.27 (m, 3H), 4.12 (q,  $J = 7.1$  Hz, 2H), 2.79-2.56 (m, 4H), 2.36-2.29 (m, 1H), 2.12-1.95 (m, 6H), 1.24 (t,  $J = 7.0$  Hz, 3H);  $^{13}\text{C NMR}$  (100 MHz,  $\text{CDCl}_3$ )  $\delta$  175.6, 173.6, 131.7, 128.1, 128.0, 123.1, 91.5, 84.0, 73.2, 60.4, 39.0, 36.9, 36.8, 30.8, 19.9, 14.2. **FT-IR**:  $\nu$  ( $\text{cm}^{-1}$ ) 2979, 2930, 1730, 1644, 1375, 1288, 1177, 1025, 757, 692. **HRMS** [ESI] calcd for  $\text{C}_{18}\text{H}_{22}\text{NO}_2$   $[\text{M}+\text{H}]^+$  284.1645, found 284.1644.

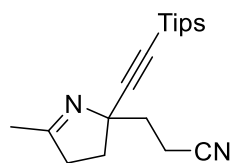

**3f**, colorless oil.  $^1\text{H NMR}$  (400 MHz,  $\text{CDCl}_3$ )  $\delta$  2.78-2.68 (m, 3H), 2.62-2.54 (m, 1H), 2.33-2.26 (m, 1H), 2.09-1.87 (m, 6H), 1.06-1.05 (m, 21H);  $^{13}\text{C NMR}$  (100 MHz,  $\text{CDCl}_3$ )  $\delta$  176.4, 120.0, 108.5, 85.5, 73.0, 39.0, 37.6, 19.7, 18.6, 13.7, 11.1. **FT-IR**:  $\nu$  ( $\text{cm}^{-1}$ ) 2942, 2865, 2162, 1647, 1462, 996, 882, 675, 661. **HRMS** [ESI] calcd for  $\text{C}_{19}\text{H}_{32}\text{N}_2\text{NaSi}$   $[\text{M}+\text{Na}]^+$  339.2227, found 339.2231.

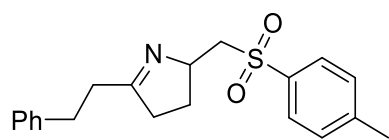

**3g**, colorless oil.  $^1\text{H NMR}$  (400 MHz,  $\text{CDCl}_3$ )  $\delta$  7.81 (d,  $J = 8.0$  Hz, 2H), 7.35 (d,  $J = 8.0$  Hz, 2H), 7.28-7.25 (m, 2H), 7.20-7.14 (m, 3H), 4.32-4.26 (m, 1H), 3.67 (dd,  $J = 14.0, 3.6$  Hz, 1H), 3.01 (dd,  $J = 14.0, 10.0$  Hz, 1H), 2.84 (t,  $J = 8.0$  Hz, 2H), 2.61-2.42 (m, 7H), 2.28-2.18 (m, 1H), 1.82-1.72 (m, 1H);  $^{13}\text{C NMR}$  (100 MHz,  $\text{CDCl}_3$ )  $\delta$  179.2, 144.7, 141.0, 136.8, 129.8, 128.4, 128.2, 128.1, 126.1, 66.9, 61.4, 38.1, 35.1, 32.3, 28.7, 21.6. **FT-IR**:  $\nu$  ( $\text{cm}^{-1}$ ) 2923, 2361, 2342, 1598, 1313, 1301, 1288, 1143, 1086, 816, 755, 700. **HRMS** [ESI] calcd for  $\text{C}_{20}\text{H}_{23}\text{NO}_2\text{S}$   $[\text{M}+\text{Na}]^+$  364.1342, found 364.1352.

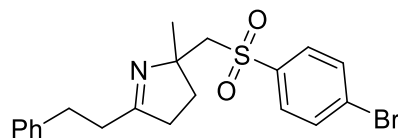

**3h**, white solid, mp. 64-65 °C.  $^1\text{H NMR}$  (400 MHz,  $\text{CDCl}_3$ )  $\delta$  7.75-7.67 (m, 4H), 7.28-7.24 (m, 2H), 7.18-7.15 (m, 3H), 3.44 (d,  $J = 14.4$  Hz, 1H), 3.28 (d,  $J = 14.4$  Hz, 1H), 2.87-2.73 (m, 2H), 2.62-2.52 (m, 4H), 2.46-2.38 (m, 1H), 1.83-1.76 (m, 1H), 1.34 (s, 3H);  $^{13}\text{C NMR}$  (100 MHz,  $\text{CDCl}_3$ )  $\delta$  177.0, 140.8, 140.4, 132.4, 129.3, 128.6, 128.4, 128.2, 126.1, 74.0, 65.0, 38.2, 35.0, 33.2, 32.3, 27.7. **FT-IR**:  $\nu$  ( $\text{cm}^{-1}$ ) 2968, 2923, 1572, 1306, 1274, 1142, 1083, 1065, 789, 722, 701. **HRMS** [ESI] calcd for  $\text{C}_{20}\text{H}_{22}\text{BrNO}_2\text{S}$   $[\text{M}+\text{Na}]^+$  442.0447, found 442.0437.

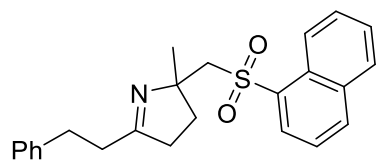

**3i**, colorless oil,  $^1\text{H NMR}$  (400 MHz,  $\text{CDCl}_3$ )  $\delta$  8.74 (d,  $J = 8.8$  Hz, 1H), 8.28 (dd,  $J = 7.2, 1.2$  Hz, 1H), 8.11 (d,  $J = 8.4$  Hz, 1H), 7.96 (d,  $J = 8.4$  Hz, 1H), 7.73-7.69 (m, 1H), 7.64-7.56 (m, 2H), 7.22-7.19 (m, 2H), 7.14-7.09 (m, 3H), 3.67 (d,  $J = 14.0$  Hz, 1H), 3.38 (d,  $J = 14.0$  Hz, 1H), 2.84-2.70 (m, 2H), 2.63-2.58 (m, 2H), 2.54-2.45 (m, 3H), 1.88-1.81 (m, 1H), 1.39 (s, 3H);  $^{13}\text{C NMR}$  (100 MHz,  $\text{CDCl}_3$ )  $\delta$  176.9, 140.9, 136.3, 135.0, 134.1, 129.9, 129.2, 128.7, 128.3, 128.2, 126.9, 126.0, 124.3, 124.1, 74.2, 64.5, 38.3, 34.9, 33.4, 32.3, 27.4. **FT-IR**:  $\nu$  ( $\text{cm}^{-1}$ ) 2921, 1308, 1273, 1154, 1115, 828, 804, 771, 759. **HRMS** [ESI] calcd for  $\text{C}_{24}\text{H}_{26}\text{NO}_2\text{S}$   $[\text{M}+\text{H}]^+$  392.1679, found 392.1665.



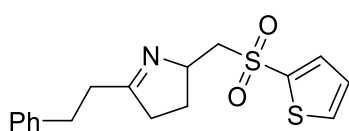

**3j**, colorless oil,  $^1\text{H NMR}$  (400 MHz,  $\text{CDCl}_3$ )  $\delta$  7.73-7.70 (m, 2H), 7.29-7.25 (m, 2H), 7.20-7.14 (m, 4H), 4.40-4.34 (m, 1H), 3.79 (dd,  $J = 14.0, 3.8$  Hz, 1H), 3.14 (dd,  $J = 14.0, 10.0$  Hz, 1H), 2.89-2.85 (m, 2H), 2.63-2.44 (m, 4H), 2.30-2.21 (m, 1H), 1.82-1.73 (m, 1H);  $^{13}\text{C NMR}$  (100 MHz,  $\text{CDCl}_3$ )  $\delta$  179.4, 140.9, 140.8, 134.1, 134.0, 128.4, 128.2, 127.9, 126.1, 67.1, 62.8, 38.1, 35.1, 32.3, 28.7; **FT-IR**:  $\nu$  ( $\text{cm}^{-1}$ ) 2923, 2361, 2341, 1638, 1402, 1312, 1227, 1139, 1015, 725, 700. **HRMS** [ESI] calcd for  $\text{C}_{17}\text{H}_{20}\text{NO}_2\text{S}_2$   $[\text{M}+\text{H}]^+$  334.0930, found 334.0922.

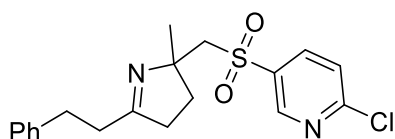

**3k**, yellow solid, mp. 68-69 °C.  $^1\text{H NMR}$  (400 MHz,  $\text{CDCl}_3$ )  $\delta$  8.84 (d,  $J = 2.0$  Hz, 1H), 8.09 (d,  $J = 8.4, 3.0$  Hz, 1H), 7.49 (d,  $J = 8.4$  Hz, 1H), 7.29-7.25 (m, 2H), 7.19-7.16 (m, 3H), 3.45 (d,  $J = 14.8$  Hz, 1H), 3.39 (d,  $J = 14.8$  Hz, 1H), 2.85-2.69 (m, 2H), 2.64-2.51 (m, 4H), 2.42-2.34 (m, 1H), 1.85-1.78 (m, 1H), 1.33 (s, 3H);  $^{13}\text{C NMR}$  (100 MHz,  $\text{CDCl}_3$ )  $\delta$  177.4, 156.3, 149.5, 140.7, 138.3, 136.8, 128.4, 128.2, 126.1, 124.5, 73.9, 65.7, 38.1, 35.0, 33.5, 32.3, 27.8. **FT-IR**:  $\nu$  ( $\text{cm}^{-1}$ ) 2966, 2929, 1571, 1449, 1318, 1276, 1144, 1107, 790, 699. **HRMS** [ESI] calcd for  $\text{C}_{19}\text{H}_{22}\text{ClN}_2\text{O}_2\text{S}$   $[\text{M}+\text{H}]^+$  377.1085, found 377.1088.

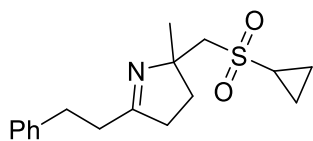

**3l**, colorless oil.  $^1\text{H NMR}$  (400 MHz,  $\text{CDCl}_3$ )  $\delta$  7.30-7.26 (m, 2H), 7.21-7.17 (m, 3H), 3.33 (d,  $J = 14.4$  Hz, 1H), 3.27 (d,  $J = 14.4$  Hz, 1H), 2.95-2.90 (m, 2H), 2.70-2.60 (m, 4H), 2.54-2.48 (m, 1H), 2.43-2.35 (m, 1H), 1.84-1.77 (m, 1H), 1.38 (s, 3H), 1.23-1.19 (m, 2H), 1.01-0.93 (m, 2H);  $^{13}\text{C NMR}$  (100 MHz,  $\text{CDCl}_3$ )  $\delta$  177.3, 140.9, 128.4, 128.2, 126.1, 73.6, 62.8, 38.1, 35.1, 33.5, 32.5, 32.1, 27.8, 5.2, 4.9. **FT-IR**:  $\nu$  ( $\text{cm}^{-1}$ ) 2921, 1309, 1275, 1115, 828, 772, 759, 700. **HRMS** [ESI] calcd for  $\text{C}_{17}\text{H}_{23}\text{NO}_2\text{S}$   $[\text{M}+\text{Na}]^+$  328.1342, found 328.1340.

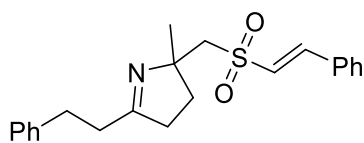

**3m**, colorless oil.  $^1\text{H NMR}$  (400 MHz,  $\text{CDCl}_3$ )  $\delta$  7.52-7.48 (m, 3H), 7.42-7.36 (m, 3H), 7.26-7.15 (m, 3H), 7.10 (d,  $J = 7.2$  Hz, 2H), 6.96 (d,  $J = 15.2$  Hz, 1H), 3.36 (d,  $J = 0.8$  Hz, 2H), 2.94-2.81 (m, 2H), 2.66-2.56 (m, 4H), 2.46-2.38 (m, 1H), 1.83-1.76 (m, 1H), 1.38 (s, 3H);  $^{13}\text{C NMR}$  (100 MHz,  $\text{CDCl}_3$ )  $\delta$  177.3, 142.2, 140.9, 132.4, 131.0, 129.0, 128.4, 128.3, 128.1, 127.7, 126.0, 73.7, 64.5, 38.2, 35.1, 33.5, 32.4, 28.0. **FT-IR**:  $\nu$  ( $\text{cm}^{-1}$ ) 2921, 1273, 1178, 1115, 827, 758. **HRMS** [ESI] calcd for  $\text{C}_{22}\text{H}_{26}\text{NO}_2\text{S}$   $[\text{M}+\text{H}]^+$  368.1679, found 368.1682.

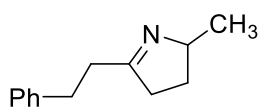

**3n**, colorless oil.  $^1\text{H NMR}$  (400 MHz,  $\text{CDCl}_3$ )  $\delta$  7.30-7.26 (m, 2H), 7.22-7.17 (m, 3H), 4.08-4.02 (m, 1H), 2.95-2.91 (m, 2H), 2.65-2.61 (m, 2H), 2.57-2.37 (m, 2H), 2.11-2.02 (m, 1H), 1.41-1.31 (m, 1H), 1.25 (d,  $J = 6.4$  Hz, 3H);  $^{13}\text{C NMR}$  (100 MHz,  $\text{CDCl}_3$ )  $\delta$  176.2, 141.4, 128.4, 128.2, 125.9, 67.7, 37.7, 35.4, 32.7, 30.6, 22.0. **FT-IR**:  $\nu$  ( $\text{cm}^{-1}$ ) 2960, 2926, 2361, 2342, 1642, 1454, 1077, 749, 699. **HRMS** [ESI] calcd for  $\text{C}_{13}\text{H}_{18}\text{N}$   $[\text{M}+\text{H}]^+$  188.1434,

found 188.1444.

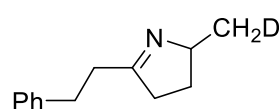

**3o**, yellow oil.  $^1\text{H NMR}$  (400 MHz,  $\text{CDCl}_3$ )  $\delta$  7.30-7.26 (m, 2H), 7.22-7.17 (m, 3H), 4.07-4.00 (m, 1H), 2.95-2.90 (m, 2H), 2.64-2.60 (m, 2H), 2.52-2.39 (m, 2H), 2.09-2.04 (m, 1H), 1.41-1.32 (m, 1H), 1.23 (dt,  $J = 6.8, 1.6$  Hz, 2H);  $^{13}\text{C NMR}$  (100 MHz,  $\text{CDCl}_3$ )  $\delta$  176.2, 141.4, 128.4, 128.2, 125.9, 67.6, 37.7, 35.4, 32.7, 30.6, 21.7 (t,  $J_{\text{C-D}} = 19.2$  Hz). **FT-IR**:  $\nu$  ( $\text{cm}^{-1}$ ) 2957, 2929, 2360, 1641, 1496, 1454, 1134, 1077, 748, 698. **HRMS** [ESI] calcd for  $\text{C}_{13}\text{H}_{17}\text{DN}$   $[\text{M}+\text{H}]^+$  189.1497, found 189.1503.

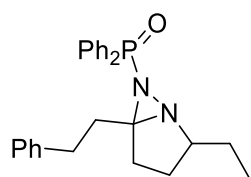

**4a**, white solid, mp. 110-111 °C.  $^1\text{H NMR}$  (400 MHz,  $\text{CDCl}_3$ )  $\delta$  8.09-8.04 (m, 2H), 7.96-7.91 (m, 2H), 7.55-7.38 (m, 6H), 7.22-7.18 (m, 2H), 7.13-7.08 (m, 3H), 2.94-2.87 (m, 1H), 2.76-2.69 (m, 1H), 2.58-2.38 (m, 3H), 2.33-2.28 (m, 1H), 1.80-1.71 (m, 1H), 1.67-1.61 (m, 1H), 1.40-1.30 (m, 1H), 1.04-0.86 (m, 2H), 0.55 (t,  $J = 7.4$  Hz, 3H);  $^{13}\text{C NMR}$  (100 MHz,  $\text{CDCl}_3$ )  $\delta$  141.1, 133.2 (d,  $J_{\text{C-P}} = 127.7$  Hz), 133.2 (d,  $J_{\text{C-P}} = 124.9$  Hz), 132.0 (d,  $J_{\text{C-P}} = 9.2$  Hz), 131.9 (d,  $J_{\text{C-P}} = 2.9$  Hz), 131.8 (d,  $J_{\text{C-P}} = 8.1$  Hz), 131.5 (d,  $J_{\text{C-P}} = 2.6$  Hz), 128.5 (d,  $J_{\text{C-P}} = 11.6$  Hz), 128.3, 128.2, 127.9 (d,  $J_{\text{C-P}} = 12.8$  Hz), 125.8, 78.2 (d,  $J_{\text{C-P}} = 8.7$  Hz), 68.1 (d,  $J_{\text{C-P}} = 5.1$  Hz), 33.7 (d,  $J_{\text{C-P}} = 3.4$  Hz), 32.4, 31.4 (d,  $J_{\text{C-P}} = 3.5$  Hz), 26.4, 25.6, 11.4;  $^{31}\text{P NMR}$  (162 MHz,  $\text{CDCl}_3$ )  $\delta$  28.7 (s). **FT-IR**:  $\nu$  ( $\text{cm}^{-1}$ ) 2970, 2924, 1439, 1208, 1118, 971, 725, 697. **HRMS** [ESI] calcd for  $\text{C}_{26}\text{H}_{29}\text{N}_2\text{NaOP}$   $[\text{M}+\text{Na}]^+$  439.1910, found 439.1908.

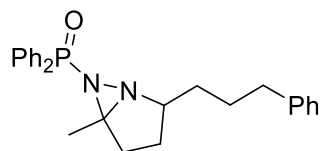

**4b**, colorless oil.  $^1\text{H NMR}$  (400 MHz,  $\text{CDCl}_3$ )  $\delta$  7.99-7.91 (m, 4H), 7.55-7.40 (m, 6H), 7.23-7.20 (m, 2H), 7.15-7.11 (m, 1H), 6.98 (d,  $J = 6.8$  Hz, 2H), 3.08-3.00 (m, 1H), 2.34-2.29 (m, 1H), 2.15-2.02 (m, 2H), 1.77-1.69 (m, 4H), 1.64-1.57 (m, 1H), 1.47-1.31 (m, 3H), 1.07-0.93 (m, 2H);  $^{13}\text{C NMR}$  (100 MHz,  $\text{CDCl}_3$ )  $\delta$  142.2, 133.3 (d,  $J_{\text{C-P}} = 131.2$  Hz), 133.0 (d,  $J_{\text{C-P}} = 121.2$  Hz), 132.1 (d,  $J_{\text{C-P}} = 9.1$  Hz), 131.8 (d,  $J_{\text{C-P}} = 2.5$  Hz), 131.6 (d,  $J_{\text{C-P}} = 8.0$  Hz), 131.6, 128.5 (d,  $J_{\text{C-P}} = 11.6$  Hz), 128.2, 128.1 (d,  $J_{\text{C-P}} = 12.8$  Hz), 128.0, 125.5, 74.6 (d,  $J_{\text{C-P}} = 8.6$  Hz), 66.5 (d,  $J_{\text{C-P}} = 5.3$  Hz), 35.5, 34.1 (d,  $J_{\text{C-P}} = 3.8$  Hz), 32.4, 28.7, 26.9, 17.8 (d,  $J_{\text{C-P}} = 3.8$  Hz);  $^{31}\text{P NMR}$  (162 MHz,  $\text{CDCl}_3$ )  $\delta$  29.4 (s). **FT-IR**:  $\nu$  ( $\text{cm}^{-1}$ ) 2930, 1438, 1211, 1122, 1108, 907, 725, 695. **HRMS** [ESI] calcd for  $\text{C}_{26}\text{H}_{29}\text{N}_2\text{NaOP}$   $[\text{M}+\text{Na}]^+$  439.1910, found 439.1924.

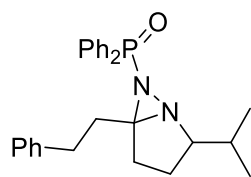

**4c**, white solid, mp. 163-164 °C.  $^1\text{H NMR}$  (400 MHz,  $\text{CDCl}_3$ )  $\delta$  8.09-8.07 (m, 2H), 8.00-7.95 (m, 2H), 7.52-7.42 (m, 6H), 7.22-7.18 (m, 2H), 7.14-7.08 (m, 3H), 2.80-2.69 (m, 1H), 2.62-2.51 (m, 2H), 2.48-2.31 (m, 3H), 1.80-1.64 (m, 2H), 1.48-1.38 (m, 1H), 0.99-0.91 (m, 1H), 0.66 (d,  $J = 6.4$  Hz, 3H), 0.50 (d,  $J = 6.4$  Hz, 3H);  $^{13}\text{C NMR}$  (100 MHz,  $\text{CDCl}_3$ )  $\delta$  141.2, 133.7 (d,  $J_{\text{C-P}} = 122.1$  Hz), 133.3 (d,  $J_{\text{C-P}} = 130.0$  Hz), 132.2 (d,  $J_{\text{C-P}} = 9.1$  Hz), 131.9 (d,  $J_{\text{C-P}} = 2.5$  Hz), 131.8 (d,  $J_{\text{C-P}} = 8.1$  Hz), 131.6 (d,  $J_{\text{C-P}} = 2.7$  Hz), 128.6 (d,  $J_{\text{C-P}} = 11.6$  Hz), 128.3, 128.2, 128.0 (d,  $J_{\text{C-P}} = 12.6$

Hz), 125.8, 77.9 (d,  $J_{C-P} = 8.5$  Hz), 73.6 (d,  $J_{C-P} = 5.1$  Hz), 33.7 (d,  $J_{C-P} = 3.4$  Hz), 32.4, 32.0, 31.6 (d,  $J_{C-P} = 3.5$  Hz), 25.7, 20.6, 20.2;  $^{31}\text{P NMR}$  (162 MHz,  $\text{CDCl}_3$ )  $\delta$  27.9 (s). **FT-IR:**  $\nu$  ( $\text{cm}^{-1}$ ) 2952, 2915, 2866, 1437, 1206, 1125, 1069, 1015, 728, 699, 624. **HRMS** [ESI] calcd for  $\text{C}_{27}\text{H}_{32}\text{N}_2\text{OP}$  [ $\text{M}+\text{H}$ ] $^+$  431.2247, found 431.2245.

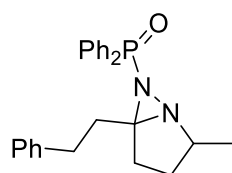

**4d**, colorless oil.  $^1\text{H NMR}$  (400 MHz,  $\text{CDCl}_3$ )  $\delta$  8.10-8.05 (m, 2H), 7.94-7.89 (m, 2H), 7.56-7.39 (m, 6H), 7.22-7.18 (m, 2H), 7.14-7.07 (m, 3H), 3.18-3.09 (m, 1H), 2.68-2.53 (m, 2H), 2.50-2.40 (m, 2H), 2.33-2.27 (m, 1H), 1.83-1.74 (m, 1H), 1.65-1.59 (m, 1H), 1.41-1.31 (m, 1H), 0.61 (d,  $J = 6.4$  Hz, 3H);  $^{13}\text{C NMR}$  (100 MHz,  $\text{CDCl}_3$ )  $\delta$  141.1, 133.3 (d,  $J_{C-P} = 131.2$  Hz), 132.9 (d,  $J_{C-P} = 121.6$  Hz), 132.0 (d,  $J_{C-P} = 2.4$  Hz), 132.0 (d,  $J_{C-P} = 9.2$  Hz), 131.9 (d,  $J_{C-P} = 8.1$  Hz), 131.6 (d,  $J_{C-P} = 2.7$  Hz), 128.6 (d,  $J_{C-P} = 11.6$  Hz), 128.3, 128.2, 128.0 (d,  $J_{C-P} = 12.8$  Hz), 125.8, 78.5 (d,  $J_{C-P} = 8.7$  Hz), 61.6 (d,  $J_{C-P} = 5.1$  Hz), 33.6 (d,  $J_{C-P} = 3.5$  Hz), 32.5, 31.9 (d,  $J_{C-P} = 3.6$  Hz), 27.9, 16.9;  $^{31}\text{P NMR}$  (162 MHz,  $\text{CDCl}_3$ )  $\delta$  29.1 (s). **FT-IR:**  $\nu$  ( $\text{cm}^{-1}$ ) 2971, 2929, 1735, 1438, 1207, 1122, 962, 726, 696. **HRMS** [ESI] calcd for  $\text{C}_{25}\text{H}_{27}\text{N}_2\text{OP}$  [ $\text{M}+\text{Na}$ ] $^+$  425.1753, found 425.1757.

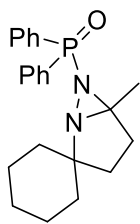

**4e**, white solid, mp. 145-146 °C.  $^1\text{H NMR}$  (400 MHz,  $\text{CDCl}_3$ )  $\delta$  7.99-7.94 (m, 2H), 7.92-7.86 (m, 2H), 7.55-7.37 (m, 6H), 2.30-2.25 (m, 1H), 1.84-1.70 (m, 5H), 1.56-1.50 (m, 2H), 1.40-1.14 (m, 6H), 1.02-0.81 (m, 3H);  $^{13}\text{C NMR}$  (100 MHz,  $\text{CDCl}_3$ )  $\delta$  133.1 (d,  $J_{C-P} = 120.9$  Hz), 133.0 (d,  $J_{C-P} = 131.8$  Hz), 132.1 (d,  $J_{C-P} = 9.1$  Hz), 131.7 (d,  $J_{C-P} = 8.0$  Hz), 131.5 (d,  $J_{C-P} = 2.8$  Hz), 128.4 (d,  $J_{C-P} = 11.7$  Hz), 127.8 (d,  $J_{C-P} = 12.8$  Hz), 73.6 (d,  $J_{C-P} = 8.6$  Hz), 68.8 (d,  $J_{C-P} = 4.8$  Hz), 35.1, 33.4, 33.2 (d,  $J_{C-P} = 3.7$  Hz), 30.4, 25.6, 22.9, 22.7, 18.4 (d,  $J_{C-P} = 3.8$  Hz);  $^{31}\text{P NMR}$  (162 MHz,  $\text{CDCl}_3$ )  $\delta$  29.6 (s). **FT-IR:**  $\nu$  ( $\text{cm}^{-1}$ ) 2950, 2929, 1438, 1212, 1115, 962, 908, 725, 694, 660. **HRMS** [ESI] calcd for  $\text{C}_{22}\text{H}_{27}\text{N}_2\text{NaOP}$  [ $\text{M}+\text{Na}$ ] $^+$  389.1753, found 389.1752.

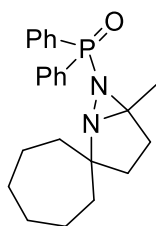

**4f**, white solid, mp. 139-140 °C.  $^1\text{H NMR}$  (400 MHz,  $\text{CDCl}_3$ )  $\delta$  7.98-7.93 (m, 2H), 7.86-7.81 (m, 2H), 7.55-7.51 (m, 1H), 7.49-7.42 (m, 3H), 7.41-7.36 (m, 2H), 2.26-2.20 (m, 2H), 1.75 (s, 3H), 1.70-1.51 (m, 4H), 1.43-1.18 (m, 6H), 1.11-1.02 (m, 2H), 0.97-0.91 (m, 1H), 0.72-0.66 (m, 1H);  $^{13}\text{C NMR}$  (100 MHz,  $\text{CDCl}_3$ )  $\delta$  133.0 (d,  $J_{C-P} = 131.1$  Hz), 132.7 (d,  $J_{C-P} = 121.8$  Hz), 132.0 (d,  $J_{C-P} = 9.2$  Hz), 131.8 (d,  $J_{C-P} = 8.1$  Hz), 131.8 (d,  $J_{C-P} = 3.1$  Hz), 131.4 (d,  $J_{C-P} = 2.7$  Hz), 128.4 (d,  $J_{C-P} = 11.7$  Hz), 127.9 (d,  $J_{C-P} = 12.9$  Hz), 75.0 (d,  $J_{C-P} = 8.6$  Hz), 72.7 (d,  $J_{C-P} = 4.6$  Hz), 37.3, 36.0, 32.9 (d,  $J_{C-P} = 3.7$  Hz), 32.6, 30.6, 30.2, 23.2, 22.9, 18.4 (d,  $J_{C-P} = 3.9$  Hz);  $^{31}\text{P NMR}$  (162 MHz,  $\text{CDCl}_3$ )  $\delta$  30.2 (s). **FT-IR:**  $\nu$  ( $\text{cm}^{-1}$ ) 2926, 2849, 1437, 1209, 1124, 1030, 930, 729, 698, 654. **HRMS** [ESI] calcd for  $\text{C}_{23}\text{H}_{30}\text{N}_2\text{OP}$  [ $\text{M}+\text{H}$ ] $^+$  381.2090, found 381.2094.

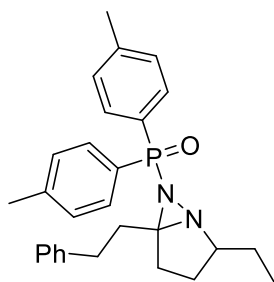

**4g**, white solid, mp. 109-110 °C.  $^1\text{H NMR}$  (400 MHz,  $\text{CDCl}_3$ )  $\delta$  7.93 (dd,  $J = 10.6, 8.0$  Hz, 2H), 7.81 (dd,  $J = 12.0, 8.0$  Hz, 2H), 7.28-7.25 (m, 2H), 7.22-7.18 (m, 4H), 7.13-7.09 (m, 3H), 2.94-2.86 (m, 1H), 2.74-2.68 (m, 1H), 2.58-2.39 (m, 3H), 2.37 (s, 3H), 2.35 (s, 3H), 2.33-2.27 (m, 1H), 1.79-1.70 (m, 1H), 1.67-1.60 (m, 1H), 1.40-1.32 (m, 1H), 1.08-1.01 (m, 1H), 0.96-0.85 (m, 1H), 0.57 (t,  $J = 7.4$  Hz, 3H);  $^{13}\text{C NMR}$  (100 MHz,  $\text{CDCl}_3$ )  $\delta$  142.2 (d,  $J_{\text{C-P}} = 2.8$  Hz), 141.7 (d,  $J_{\text{C-P}} = 2.8$  Hz), 141.3, 132.0 (d,  $J_{\text{C-P}} = 9.5$  Hz), 131.7 (d,  $J_{\text{C-P}} = 8.5$  Hz), 130.2 (d,  $J_{\text{C-P}} = 127.9$  Hz), 130.2 (d,  $J_{\text{C-P}} = 129.3$  Hz), 129.2 (d,  $J_{\text{C-P}} = 11.9$  Hz), 128.6 (d,  $J_{\text{C-P}} = 13.1$  Hz), 128.3, 128.1, 125.7, 77.9 (d,  $J_{\text{C-P}} = 8.6$  Hz), 77.2, 68.1 (d,  $J_{\text{C-P}} = 5.1$  Hz), 33.7 (d,  $J_{\text{C-P}} = 3.4$  Hz), 32.5, 31.4 (d,  $J_{\text{C-P}} = 3.6$  Hz), 26.5, 25.7, 21.5 (d,  $J_{\text{C-P}} = 5.8$  Hz), 11.4;  $^{31}\text{P NMR}$  (162 MHz,  $\text{CDCl}_3$ )  $\delta$  29.2 (s). **FT-IR**:  $\nu$  ( $\text{cm}^{-1}$ ) 2958, 2919, 2855, 1456, 1199, 1121, 1105, 1033, 972, 806, 713, 702, 661, 627. **HRMS** [ESI] calcd for  $\text{C}_{28}\text{H}_{34}\text{N}_2\text{OP}$   $[\text{M}+\text{H}]^+$  445.2403, found 445.2401.

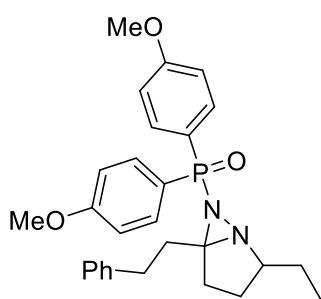

**4h**, white solid, mp. 122-123 °C.  $^1\text{H NMR}$  (400 MHz,  $\text{CDCl}_3$ )  $\delta$  7.99-7.94 (m, 2H), 7.86-7.81 (m, 2H), 7.23-7.19 (m, 2H), 7.14-7.10 (m, 3H), 6.99-6.91 (m, 4H), 3.82 (s, 3H), 3.82 (s, 3H), 2.94-2.87 (m, 1H), 2.74-2.67 (m, 1H), 2.58-2.36 (m, 3H), 2.32-2.26 (m, 1H), 1.79-1.60 (m, 2H), 1.39-1.29 (m, 1H), 1.09-0.88 (m, 2H), 0.60 (t,  $J = 7.4$  Hz, 3H);  $^{13}\text{C NMR}$  (100 MHz,  $\text{CDCl}_3$ )  $\delta$  162.4, 162.1, 141.3, 133.8 (d,  $J_{\text{C-P}} = 10.4$  Hz), 133.5 (d,  $J_{\text{C-P}} = 9.3$  Hz), 128.4, 128.2, 125.8, 125.0 (d,  $J_{\text{C-P}} = 137.8$  Hz), 124.9 (d,  $J_{\text{C-P}} = 129.0$  Hz), 114.0 (d,  $J_{\text{C-P}} = 12.5$  Hz), 113.5 (d,  $J_{\text{C-P}} = 13.8$  Hz), 77.9 (d,  $J_{\text{C-P}} = 8.6$  Hz), 68.1 (d,  $J_{\text{C-P}} = 5.1$  Hz), 55.2, 33.7 (d,  $J_{\text{C-P}} = 3.4$  Hz), 32.5, 31.4 (d,  $J_{\text{C-P}} = 3.5$  Hz), 26.5, 25.8, 11.5;  $^{31}\text{P NMR}$  (162 MHz,  $\text{CDCl}_3$ )  $\delta$  29.0 (s). **FT-IR**:  $\nu$  ( $\text{cm}^{-1}$ ) 2960, 2934, 1595, 1500, 1292, 1247, 1124, 1106, 1022, 980, 833, 799, 702. **HRMS** [ESI] calcd for  $\text{C}_{28}\text{H}_{34}\text{N}_2\text{O}_3\text{P}$   $[\text{M}+\text{H}]^+$  477.2302, found 477.2295.

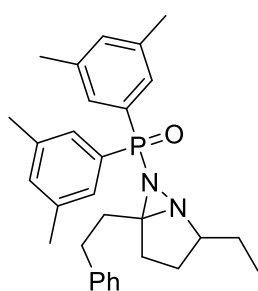

**4i**, white solid, mp. 147-148 °C.  $^1\text{H NMR}$  (400 MHz,  $\text{CDCl}_3$ )  $\delta$  7.65 (d,  $J = 11.2$  Hz, 2H), 7.52 (d,  $J = 12.4$  Hz, 2H), 7.22-7.18 (m, 2H), 7.14-7.08 (m, 5H), 2.93-2.86 (m, 1H), 2.73-2.67 (m, 1H), 2.58-2.41 (m, 3H), 2.35 (s, 6H), 2.31 (s, 6H), 2.29-2.24 (m, 1H), 1.78-1.60 (m, 2H), 1.42-1.31 (m, 1H), 1.08-0.86 (m, 2H), 0.58 (t,  $J = 7.4$  Hz, 3H);  $^{13}\text{C NMR}$  (100 MHz,  $\text{CDCl}_3$ )  $\delta$  141.3, 138.1 (d,  $J_{\text{C-P}} = 12.3$  Hz), 137.5 (d,  $J_{\text{C-P}} = 13.4$  Hz), 133.0 (d,  $J_{\text{C-P}} = 129.1$  Hz), 133.0 (d,  $J_{\text{C-P}} = 120.5$  Hz), 133.6 (d,  $J_{\text{C-P}} = 2.8$  Hz), 133.1 (d,  $J_{\text{C-P}} = 2.8$  Hz), 129.6 (d,  $J_{\text{C-P}} = 9.2$  Hz), 129.4 (d,  $J_{\text{C-P}} = 8.1$  Hz), 128.4, 128.2, 125.7, 78.0 (d,  $J_{\text{C-P}} = 8.6$  Hz), 68.1 (d,  $J_{\text{C-P}} = 5.1$  Hz), 33.6 (d,  $J_{\text{C-P}} = 3.4$  Hz), 32.5, 31.5 (d,  $J_{\text{C-P}} = 3.6$  Hz), 26.6, 25.6, 21.3, 21.2, 11.5;  $^{31}\text{P NMR}$  (162 MHz,  $\text{CDCl}_3$ )  $\delta$  29.8 (s). **FT-IR**:  $\nu$  ( $\text{cm}^{-1}$ ) 2955, 2921, 1455, 1216, 1124, 1012, 875, 855, 695. **HRMS** [ESI] calcd for  $\text{C}_{30}\text{H}_{37}\text{N}_2\text{NaOP}$   $[\text{M}+\text{Na}]^+$  495.2536, found 495.2538.

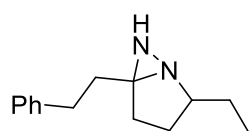

**5a**, colorless oil.  $^1\text{H NMR}$  (400 MHz,  $\text{CDCl}_3$ )  $\delta$  7.30-7.26 (m, 2H), 7.20-7.18 (m, 3H), 2.95-2.88 (m, 1H), 2.76 (t,  $J = \text{Hz}$ , 2H), 2.23-2.15 (m, 2H), 2.00-1.92 (m, 1H), 1.80-1.68 (m, 2H), 1.62-1.55 (m, 1H), 1.51-1.40 (m, 1H), 1.27-1.17 (m, 1H), 0.98 (t,  $J = 7.4 \text{ Hz}$ , 3H);  $^{13}\text{C NMR}$  (100 MHz,  $\text{CDCl}_3$ )  $\delta$  141.1, 128.5, 128.2, 126.1, 67.8, 66.6, 37.5, 31.7, 29.7, 26.4, 25.7, 11.9. **FT-IR**:  $\nu$  ( $\text{cm}^{-1}$ ) 3207, 2961, 2931, 1454, 1379, 1269, 967, 747, 701. **HRMS** [ESI] calcd for  $\text{C}_{14}\text{H}_{21}\text{N}_2$   $[\text{M}+\text{H}]^+$  217.1699, found 217.1707.

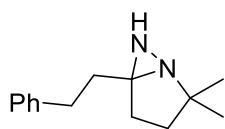

**5b**, colorless oil.  $^1\text{H NMR}$  (400 MHz,  $\text{CDCl}_3$ )  $\delta$  7.30-7.26 (m, 2H), 7.21-7.17 (m, 3H), 2.78 (t,  $J = 8.2 \text{ Hz}$ , 2H), 2.16-1.98 (m, 3H), 1.88-1.80 (m, 1H), 1.49-1.41 (m, 1H), 1.33-1.28 (m, 1H), 1.23 (s, 3H), 1.06 (s, 3H);  $^{13}\text{C NMR}$  (100 MHz,  $\text{CDCl}_3$ )  $\delta$  141.1, 128.5, 128.2, 126.1, 67.9, 63.7, 37.7, 33.2, 31.8, 29.0, 26.0, 25.2. **HRMS** [ESI] calcd for  $\text{C}_{14}\text{H}_{21}\text{N}_2$   $[\text{M}+\text{H}]^+$  217.1699, found 217.1703.

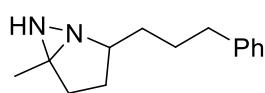

**5c**, colorless oil.  $^1\text{H NMR}$  (400 MHz,  $\text{CDCl}_3$ )  $\delta$  7.30-7.26 (m, 2H), 7.21-7.16 (m, 3H), 3.08-3.01 (m, 1H), 2.72-2.61 (m, 2H), 2.17-2.12 (m, 1H), 1.88-1.64 (m, 3H), 1.60-1.48 (m, 5H), 1.29-1.20 (m, 2H);  $^{13}\text{C NMR}$  (100 MHz,  $\text{CDCl}_3$ )  $\delta$  142.5, 128.4, 128.2, 125.6, 65.0, 64.9, 36.1, 32.3, 31.7, 29.3, 27.0, 21.6. **FT-IR**:  $\nu$  ( $\text{cm}^{-1}$ ) 2928, 2859, 1453, 747, 698. **HRMS** [ESI] calcd for  $\text{C}_{14}\text{H}_{20}\text{N}_2\text{Na}$   $[\text{M}+\text{Na}]^+$  239.1519, found 239.1512.

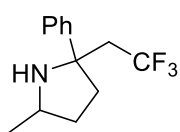

**6**, dr = 1.2:1, colorless oil.  $^1\text{H NMR}$  (400 MHz,  $\text{CDCl}_3$ )  $\delta$  7.49-7.42 (m, 2H, two isomers), 7.35-7.30 (m, 2H, two isomers), 7.25-7.21 (m, 1H, two isomers), 3.52-3.43 (m, 0.45H) & 3.25-3.16 (m, 0.55H) (two isomers), 2.77-2.56 (m, 2H, two isomers), 2.33-2.26 (m, 0.67H) & 2.20-2.11 (m, 1.66H) & 1.84-1.76 (m, 0.67H) (two isomers), 2.02-1.97 (m, 1H, two isomers), 1.45-1.35 (m, 1H) (two isomers), 1.18 (t,  $J = 6.4 \text{ Hz}$ , 3H, two isomers);  $^{13}\text{C NMR}$  (100 MHz,  $\text{CDCl}_3$ )  $\delta$  146.4 & 145.1 (two isomers), 128.2 & 128.1 (two isomers), 126.7 & 126.6 (two isomers), 125.9 (q,  $J_{\text{C-F}} = 277.0 \text{ Hz}$ ) & 125.9 (q,  $J_{\text{C-F}} = 276.9 \text{ Hz}$ ) (two isomers), 125.9 & 125.7 (two isomers), 65.0 (q,  $J_{\text{C-F}} = 1.3 \text{ Hz}$ ) & 64.9 (q,  $J_{\text{C-F}} = 1.4 \text{ Hz}$ ) (two isomers), 53.0 & 52.5 (two isomers), 46.9 (q,  $J_{\text{C-F}} = 25.3 \text{ Hz}$ ) & 44.5 (q,  $J_{\text{C-F}} = 24.6 \text{ Hz}$ ) (two isomers), 39.4 & 39.0 (two isomers), 32.5 & 32.4 (two isomers), 22.3 & 22.2 (two isomers);  $^{19}\text{F NMR}$  (376 MHz,  $\text{CDCl}_3$ )  $\delta$  -60.2 (s) & -60.3 (s) (two isomers). **FT-IR**:  $\nu$  ( $\text{cm}^{-1}$ ) 2962, 1364, 1119, 1031, 764, 701, 648. **HRMS** [ESI] calcd for  $\text{C}_{13}\text{H}_{17}\text{F}_3\text{N}$   $[\text{M}+\text{H}]^+$  244.1308, found 244.1304.

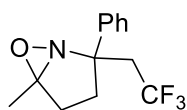

**7**, dr = 4.4:1, white solid, mp. 66-67 °C.  $^1\text{H NMR}$  (400 MHz,  $\text{CDCl}_3$ )  $\delta$  7.46-7.40 (m, 2H, two isomers), 7.32-7.18 (m, 3H, two isomers), 2.95-2.61 (m, 1.63 H) & 2.55-2.41 (m, 0.37 H) (two isomers), 2.39-2.19 (m, 2H, two isomers), 2.12-1.90 (m, 0.37H) & 1.80-1.66 (m, 1.63H) (two isomers), 1.59 (s, 0.55H) & 1.46 (s, 2.45H) (two isomers);  $^{13}\text{C NMR}$  (100 MHz,  $\text{CDCl}_3$ )  $\delta$  143.7 & 138.6 (two isomers), 128.5 & 128.3 (two isomers), 127.9 & 127.3 (two isomers), 126.7 & 126.0 (two isomers), 125.6 (q,  $J_{\text{C-F}} = 276.2 \text{ Hz}$ ) & 125.2 (q,  $J_{\text{C-F}} = 277.1 \text{ Hz}$ )

(two isomers), 88.8 & 87.2 (two isomers), 72.2 (q,  $J_{C-F} = 1.5$  Hz) & 71.3 (q,  $J_{C-F} = 1.9$  Hz) (two isomers), 43.7 (q,  $J_{C-F} = 27.0$  Hz) & 30.8 (q,  $J_{C-F} = 41.1$  Hz) (two isomers), 30.1 & 29.7 (two isomers), 30.1 & 29.6 (two isomers), 18.8 & 18.7 (two isomers);  **$^{19}\text{F}$  NMR** (376 MHz,  $\text{CDCl}_3$ )  $\delta$  -59.9 (s) & -60.5 (s) (two isomers). **FT-IR:**  $\nu$  ( $\text{cm}^{-1}$ ) 2984, 1723, 1449, 1259, 1241, 1151, 1124, 1054, 856, 800, 698, 649. **HRMS** [ESI] calcd for  $\text{C}_{13}\text{H}_{15}\text{F}_3\text{NO}$   $[\text{M}+\text{H}]^+$  258.1100, found 258.1099.

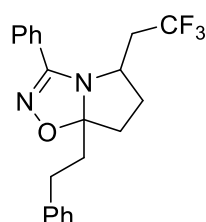

**8**, dr = 1.3:1, white solid, mp. 64-65 °C. *Major isomer:*  **$^1\text{H}$  NMR** (400 MHz,  $\text{CDCl}_3$ )  $\delta$  7.70-7.68 (m, 2H), 7.50-7.42 (m, 3H), 7.29-7.25 (m, 2H), 7.22-7.16 (m, 3H), 3.84-3.79 (m, 1H), 2.89-2.80 (m, 2H), 2.53-2.35 (m, 2H), 2.30-2.13 (m, 3H), 2.10-2.00 (m, 2H), 1.87-1.82 (m, 1H);  **$^{13}\text{C}$  NMR** (100 MHz,  $\text{CDCl}_3$ )  $\delta$  158.8, 141.6, 130.9, 128.9, 128.4, 128.3, 127.8, 126.3, 125.9, 125.5 (q,  $J_{C-F} = 275.5$  Hz), 109.3, 58.6 (q,  $J_{C-F} = 2.8$  Hz), 42.4, 38.7 (q,  $J_{C-F} = 27.1$  Hz), 35.9, 29.9, 28.8;  **$^{19}\text{F}$  NMR** (376 MHz,  $\text{CDCl}_3$ )  $\delta$  -63.7 (s). **FT-IR:**  $\nu$  ( $\text{cm}^{-1}$ ) 2950, 1393, 1248, 1160, 1136, 1120, 906, 755, 700, 688. **HRMS** [ESI] calcd for  $\text{C}_{21}\text{H}_{21}\text{F}_3\text{N}_2\text{NaO}$   $[\text{M}+\text{Na}]^+$  397.1498, found 397.1505.

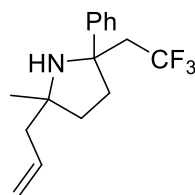

**9**, dr = 5.8:1, light yellow oil.  **$^1\text{H}$  NMR** (400 MHz,  $\text{CDCl}_3$ )  $\delta$  7.44-7.32 (m, 2H, two isomers), 7.26-7.22 (m, 2H, two isomers), 7.18-7.13 (m, 1H, two isomers), 5.88-5.70 (m, 1H, two isomers), 5.06-4.85 (m, 2H, two isomers), 2.65-2.44 (m, 2H, two isomers), 2.29-2.12 (m, 2H, two isomers), 1.98 (d,  $J = 7.2$  Hz, 1.70 H) & 1.74-1.67 (m, 0.30H) (two isomers), 1.60 (t,  $J = 7.2$  Hz, 1.57H) & 1.50-1.43 (m, 0.35 H) (two isomers), 1.15 (s, 2.56H) & 0.97 (s, 0.44H) (two isomers);  **$^{13}\text{C}$  NMR** (100 MHz,  $\text{CDCl}_3$ )  $\delta$  146.8 & 146.8 (two isomers), 135.6 & 135.1 (two isomers), 128.0 (two isomers), 126.5 (two isomers), 125.8 (q,  $J_{C-F} = 277.1$  Hz) (two isomers), 125.9 (two isomers), 117.9 & 117.3 (two isomers), 64.9 & 64.9 (two isomers), 61.6 (two isomers), 48.3 & 47.9 (two isomers), 47.1 (q,  $J_{C-F} = 24.6$  Hz) (two isomers), 38.6 & 38.4 (two isomers), 37.2 & 36.6 (two isomers), 28.9 & 28.8 (two isomers);  **$^{19}\text{F}$  NMR** (376 MHz,  $\text{CDCl}_3$ )  $\delta$  -60.1 (s) & -60.1 (s) (two isomers). **FT-IR:**  $\nu$  ( $\text{cm}^{-1}$ ) 2962, 1361, 1258, 1118, 1078, 914, 702. **HRMS** [ESI] calcd for  $\text{C}_{16}\text{H}_{21}\text{F}_3\text{N}$   $[\text{M}+\text{H}]^+$  284.1621, found 284.1612.

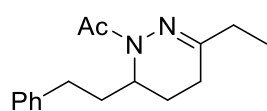

**10**, light yellow solid, mp. 66-67 °C.  **$^1\text{H}$  NMR** (400 MHz,  $\text{CDCl}_3$ )  $\delta$  7.30-7.26 (m, 2H), 7.21-7.17 (m, 3H), 4.61-4.57 (m, 1H), 2.91 (t, 2H,  $J = 7.8$  Hz, 2H), 2.54 (t,  $J = 7.8$  Hz, 2H), 2.25 (s, 3H), 2.16-1.98 (m, 2H), 1.91-1.86 (m, 1H), 1.68-1.58 (m, 1H), 1.54-1.46 (m, 1H), 1.34-1.26 (m, 1H), 0.87 (t,  $J = 7.4$  Hz, 3H);  **$^{13}\text{C}$  NMR** (100 MHz,  $\text{CDCl}_3$ )  $\delta$  171.5, 151.0, 141.3, 128.3, 128.3, 126.0, 47.2, 39.2, 32.3, 23.0, 21.8, 21.4, 19.5, 10.2. **FT-IR:**  $\nu$  ( $\text{cm}^{-1}$ ) 2930, 1722, 1656, 1371, 1344, 1259, 1210, 1151, 800. **HRMS** [ESI] calcd for  $\text{C}_{16}\text{H}_{22}\text{N}_2\text{NaO}$   $[\text{M}+\text{Na}]^+$  281.1624, found 281.1621.

## 8. NMR Spectra

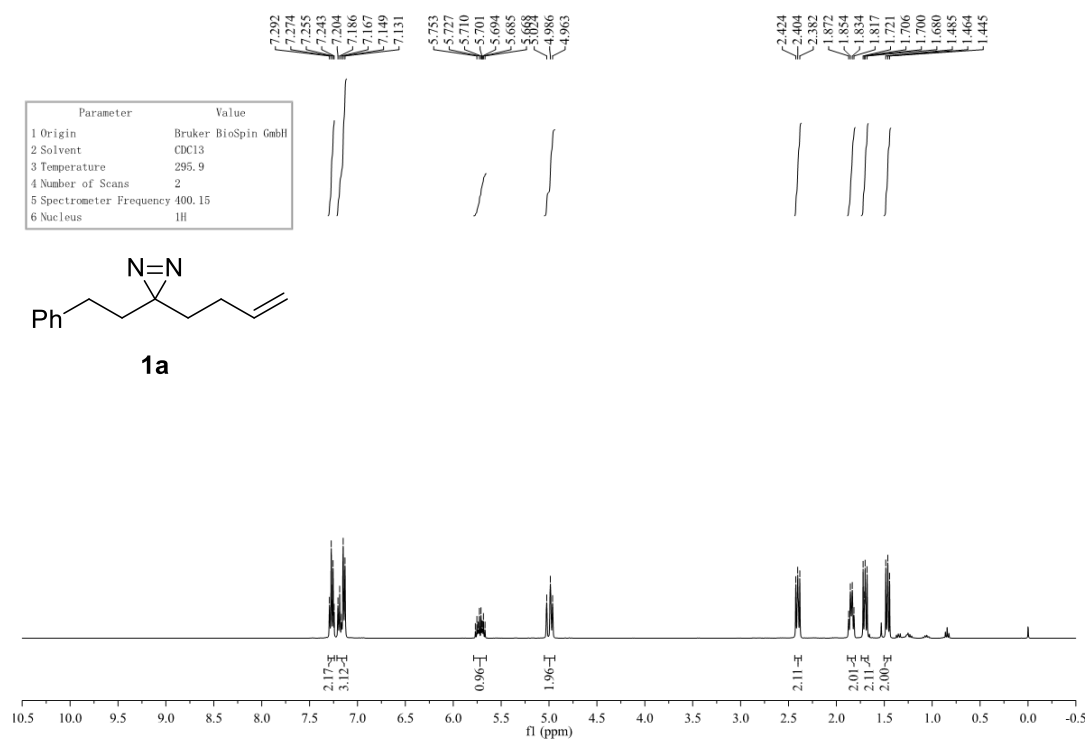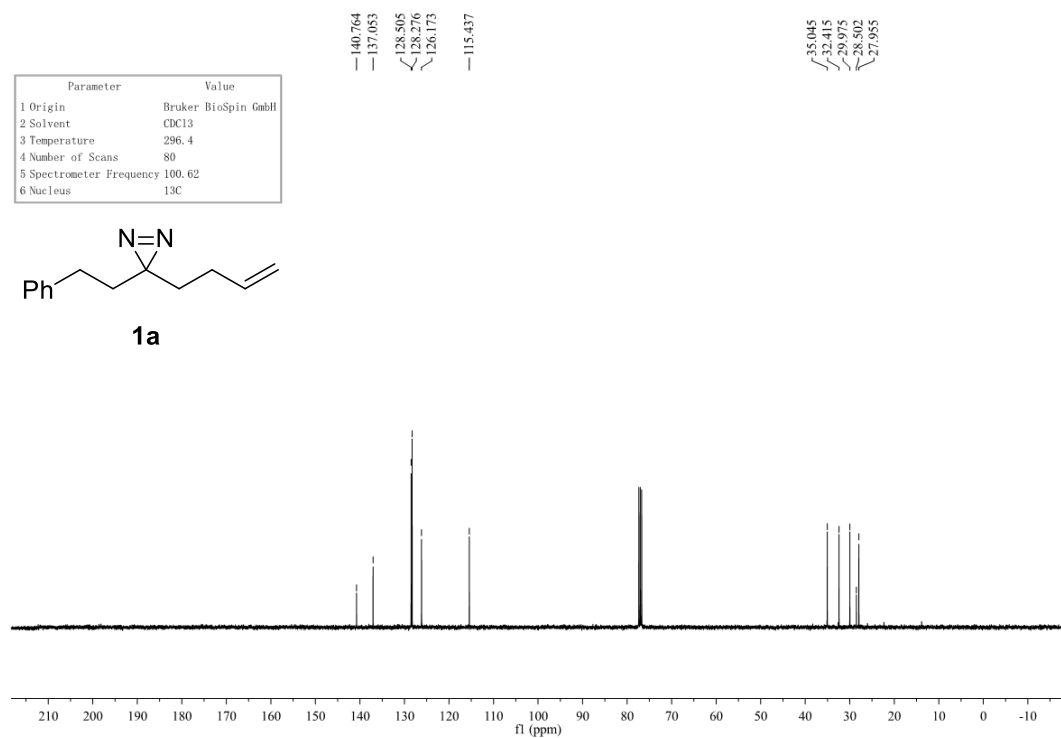

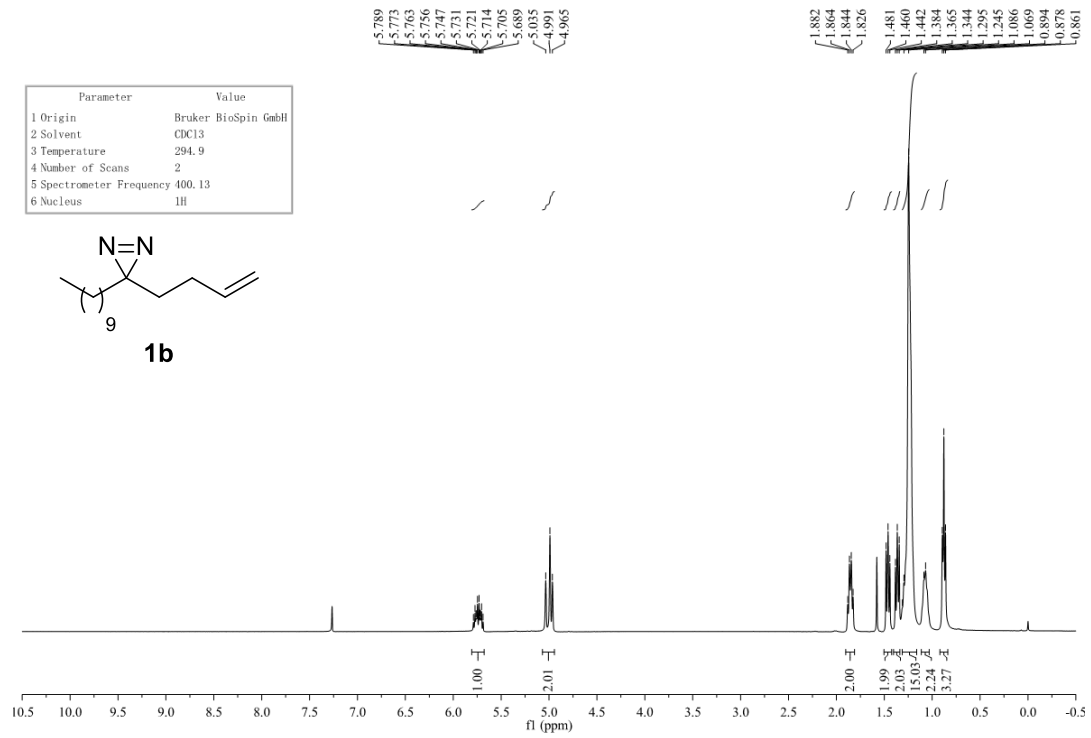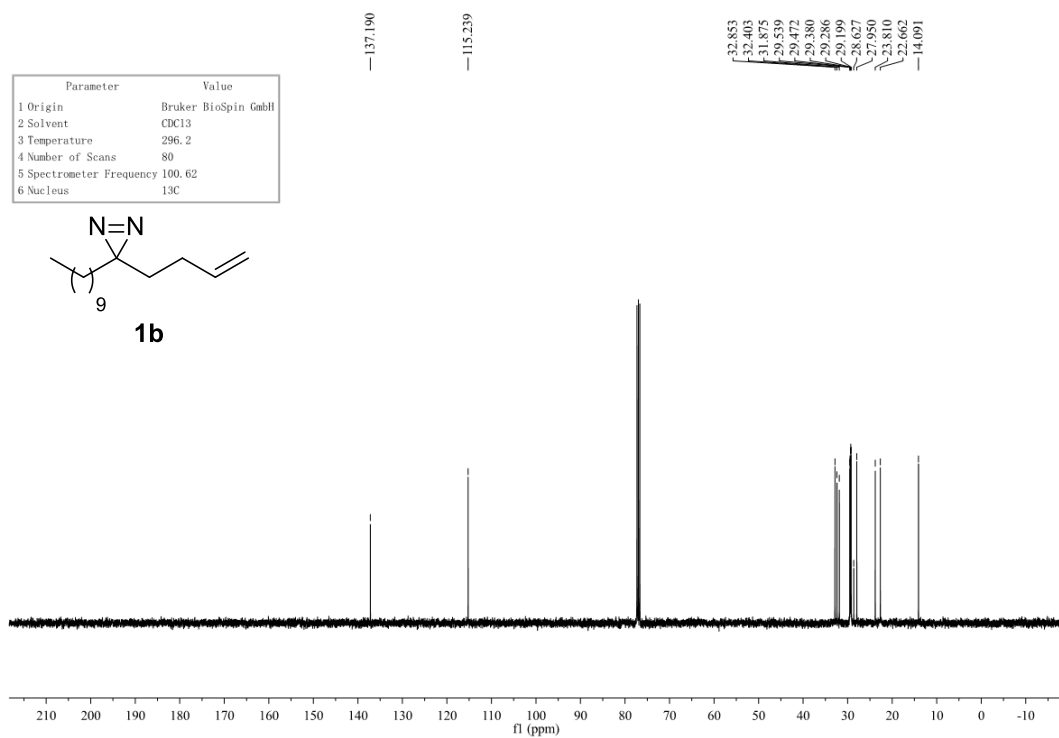



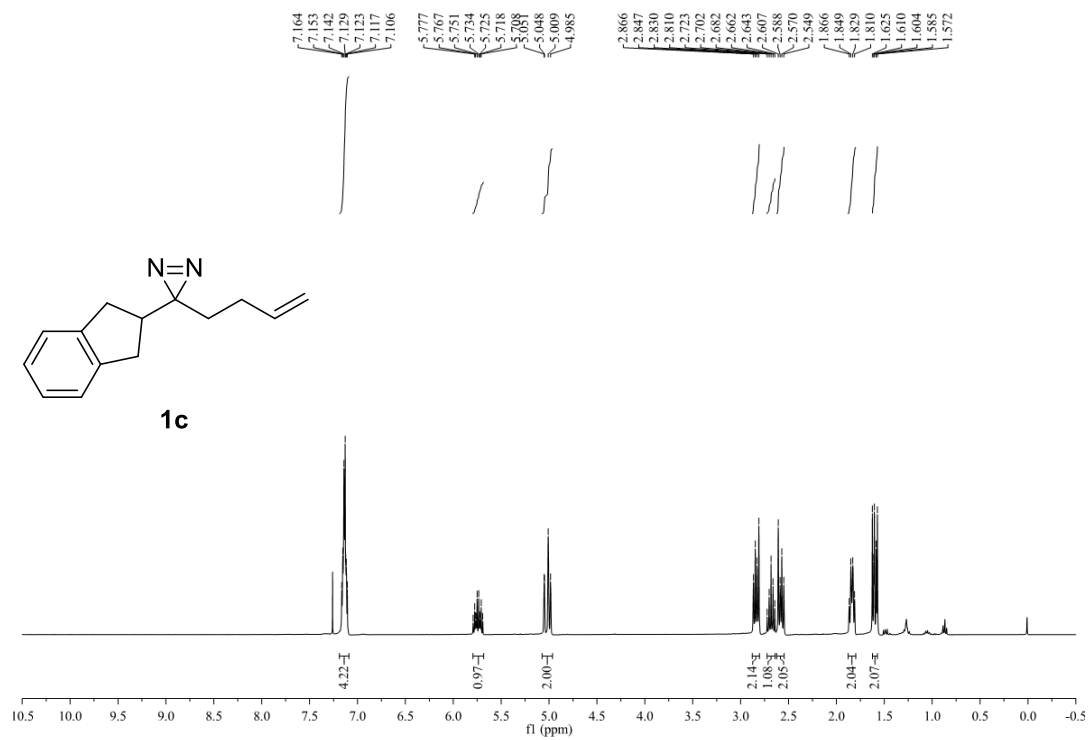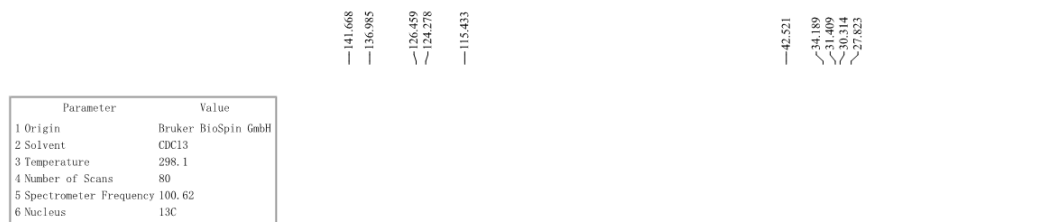

| Parameter                | Value               |
|--------------------------|---------------------|
| 1 Origin                 | Bruker BioSpin GmbH |
| 2 Solvent                | CDCl3               |
| 3 Temperature            | 298.1               |
| 4 Number of Scans        | 80                  |
| 5 Spectrometer Frequency | 100.62              |
| 6 Nucleus                | 13C                 |

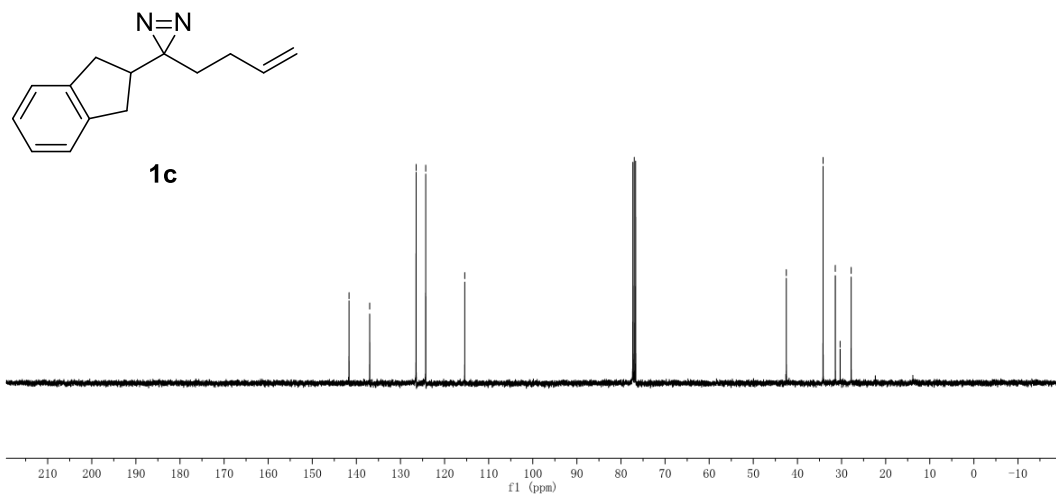

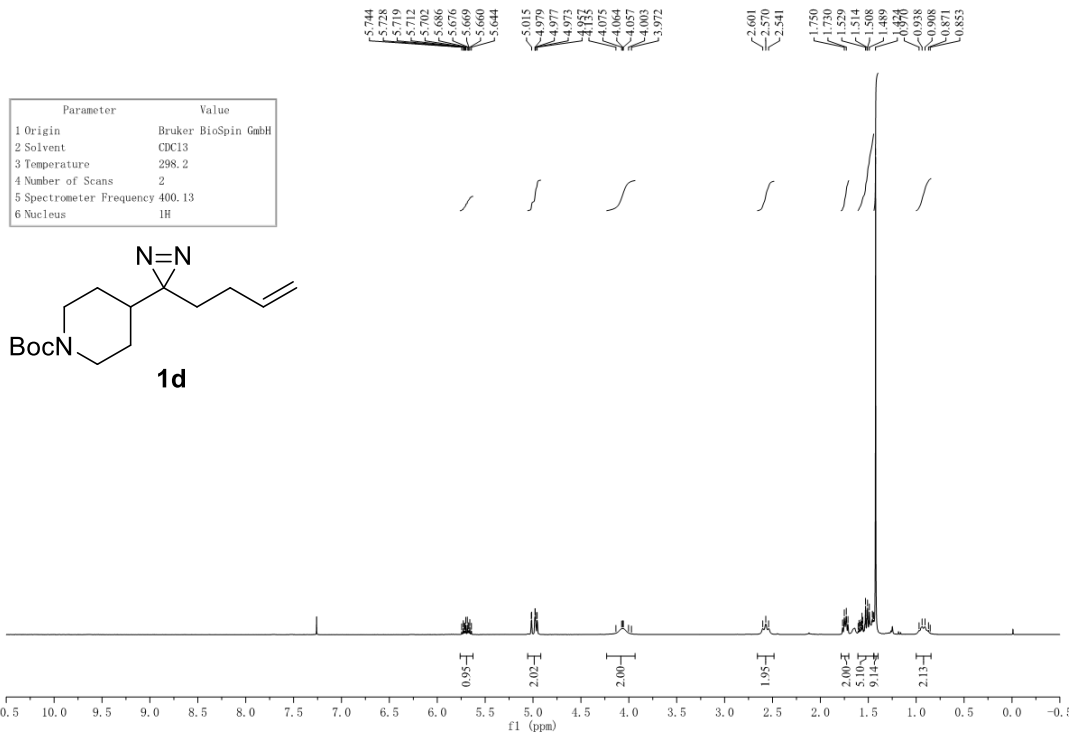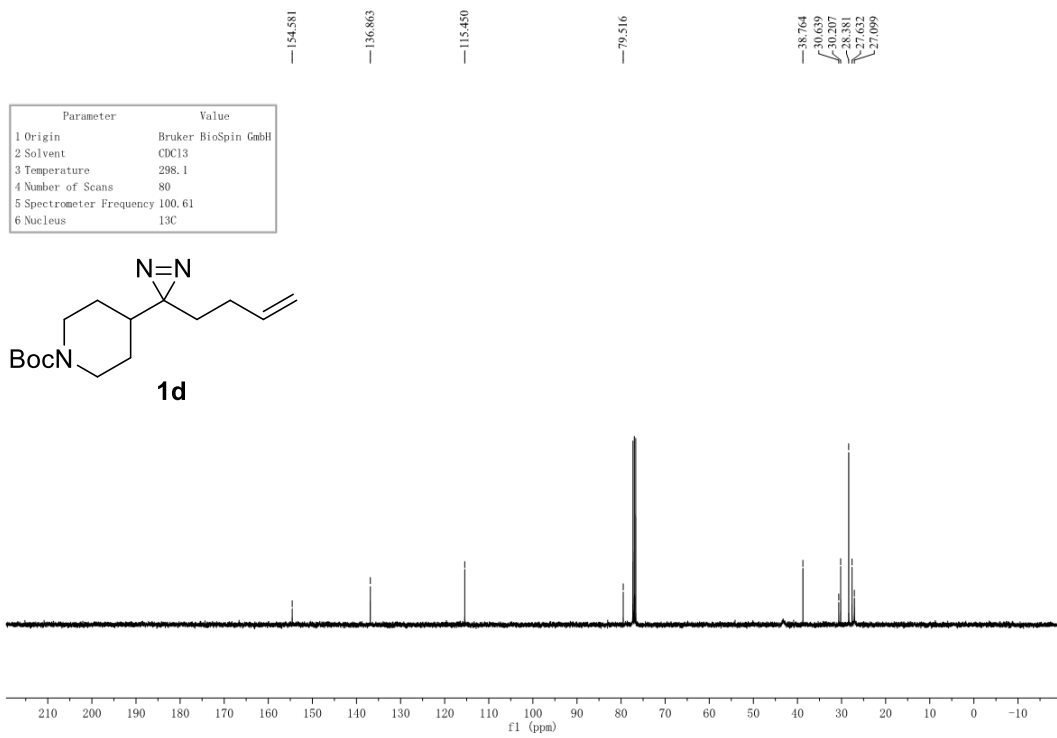

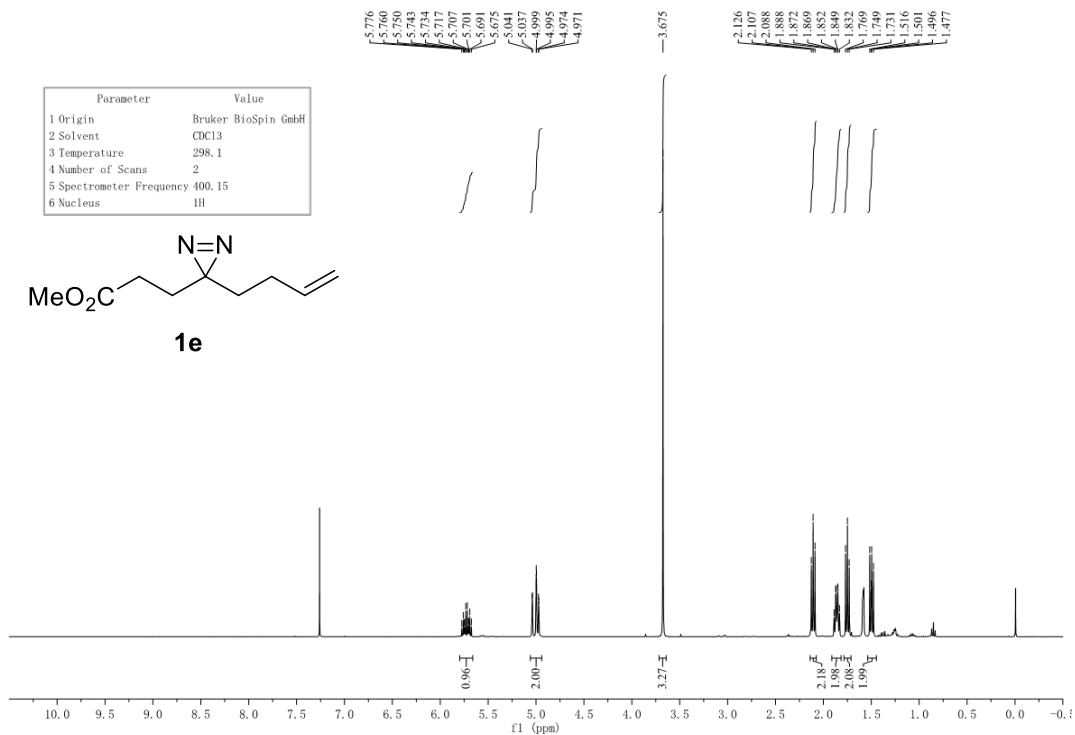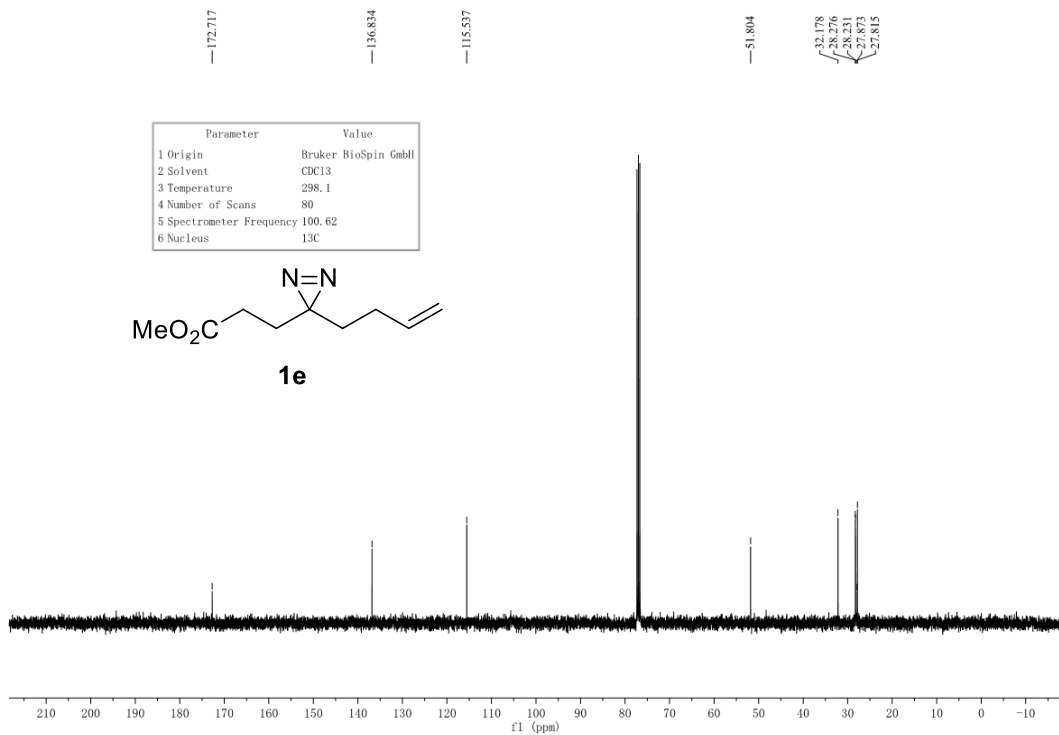

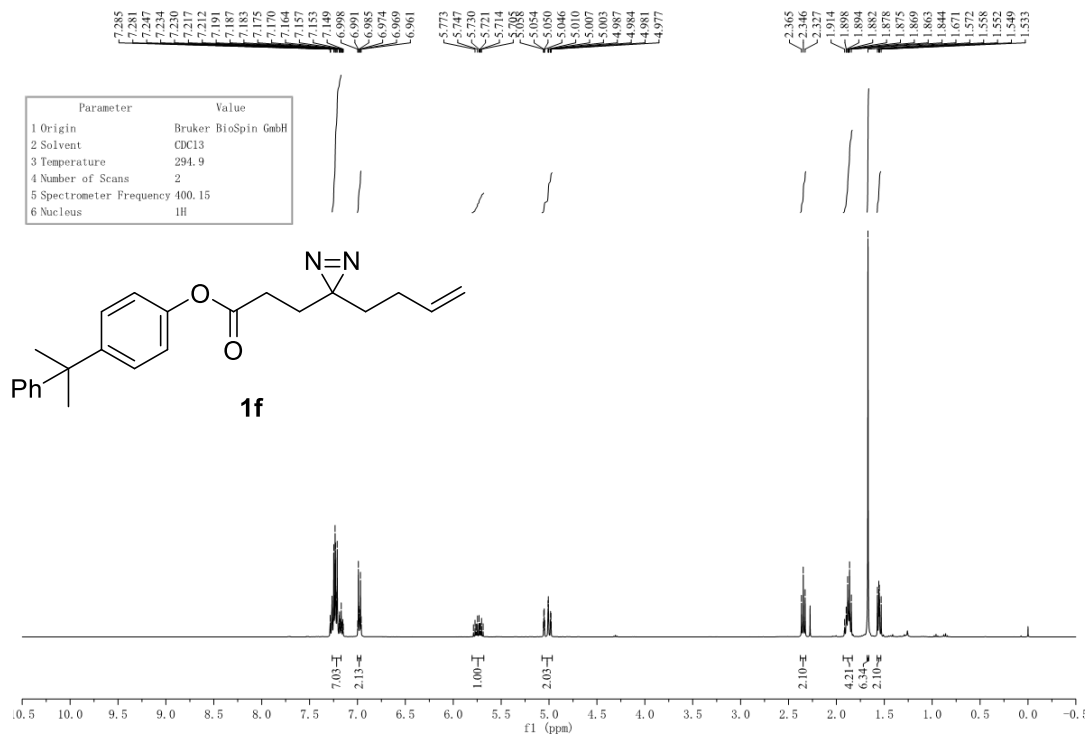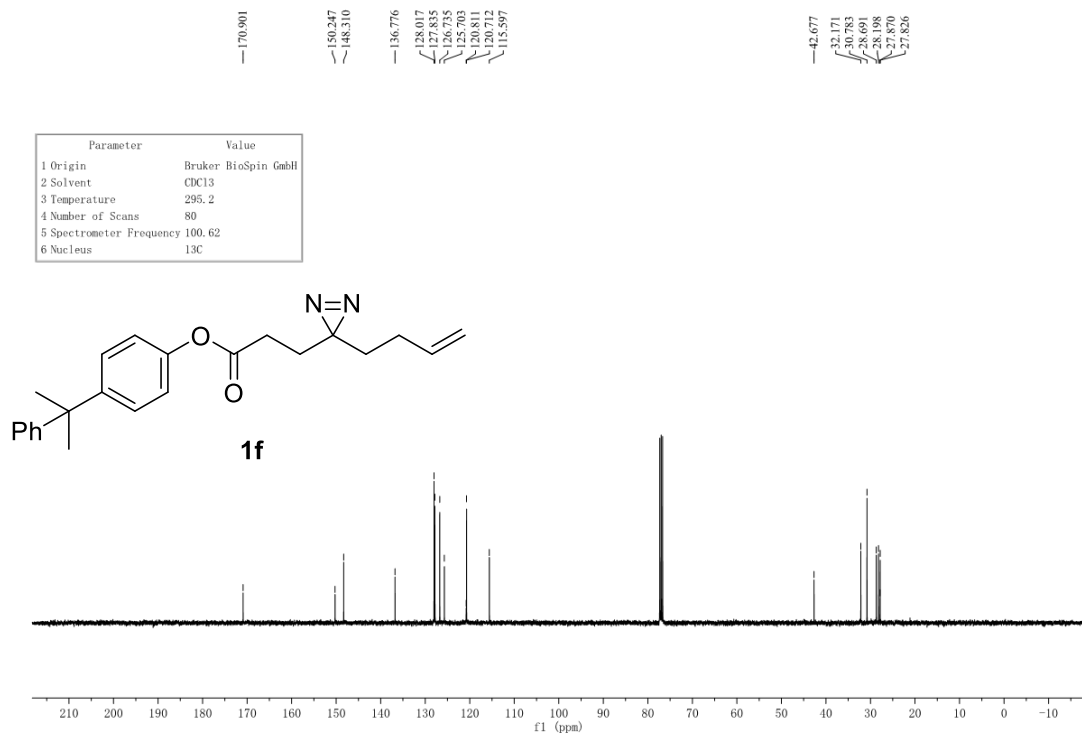

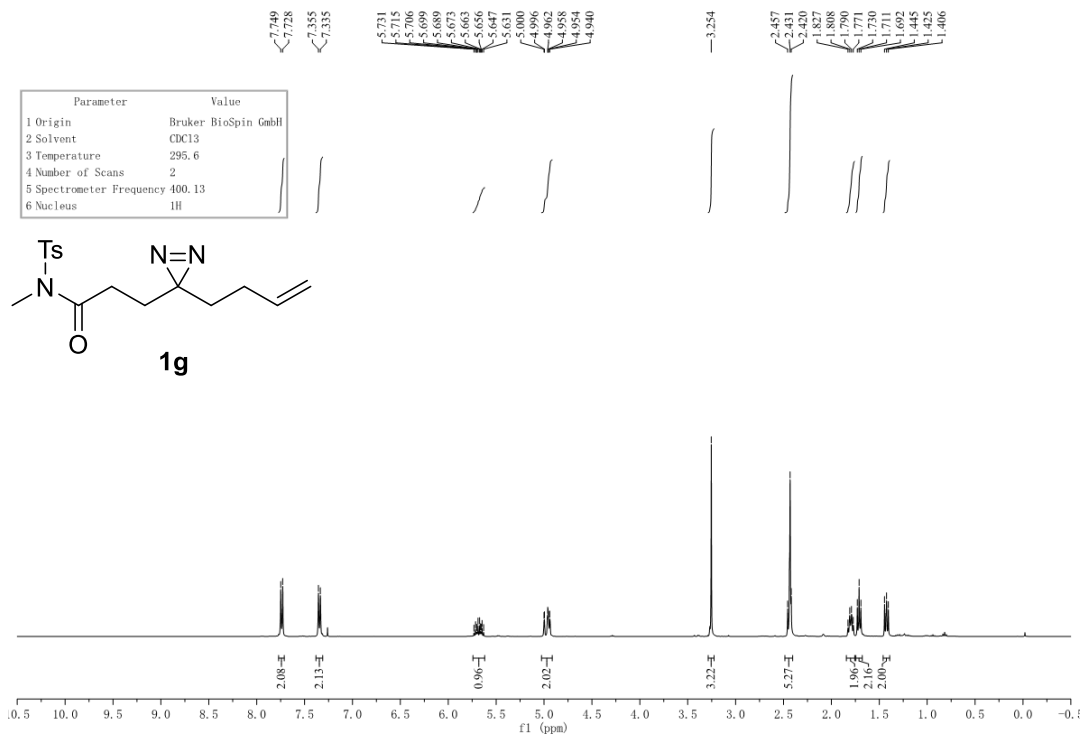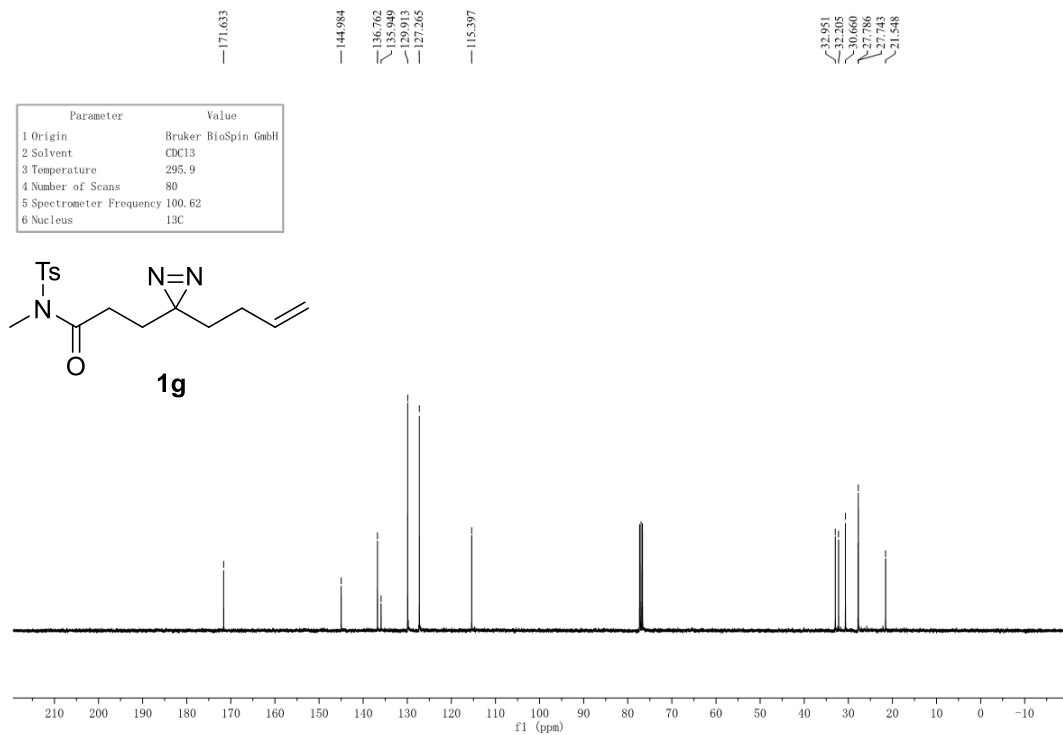

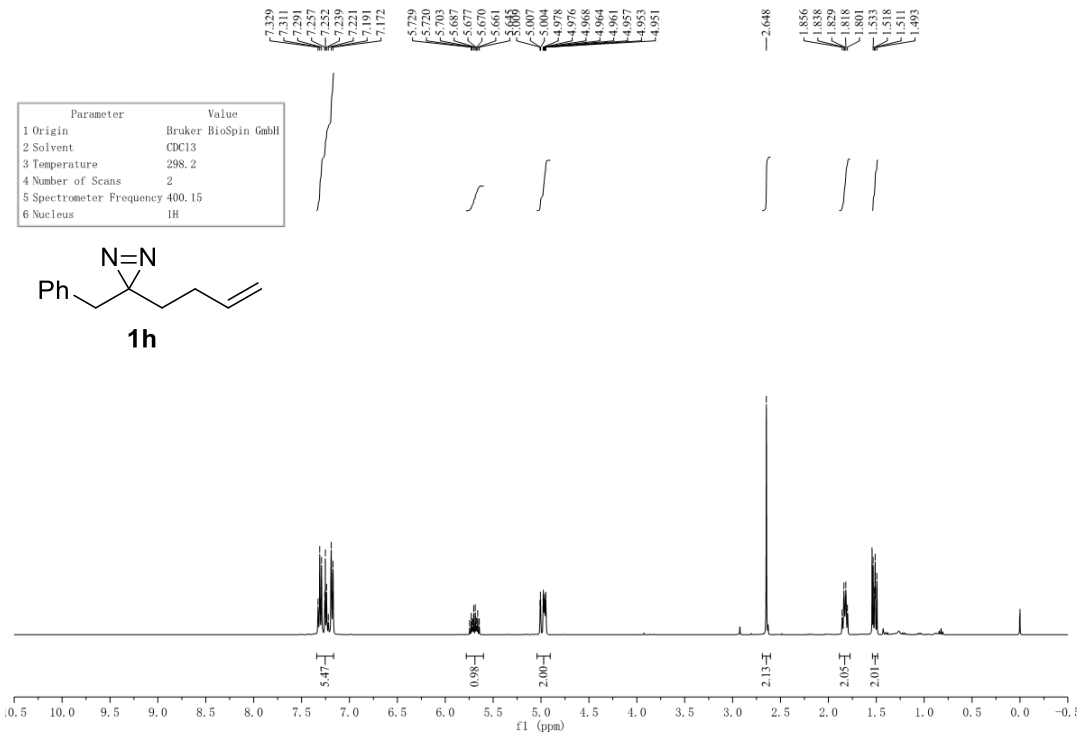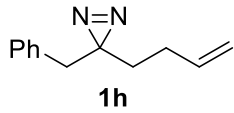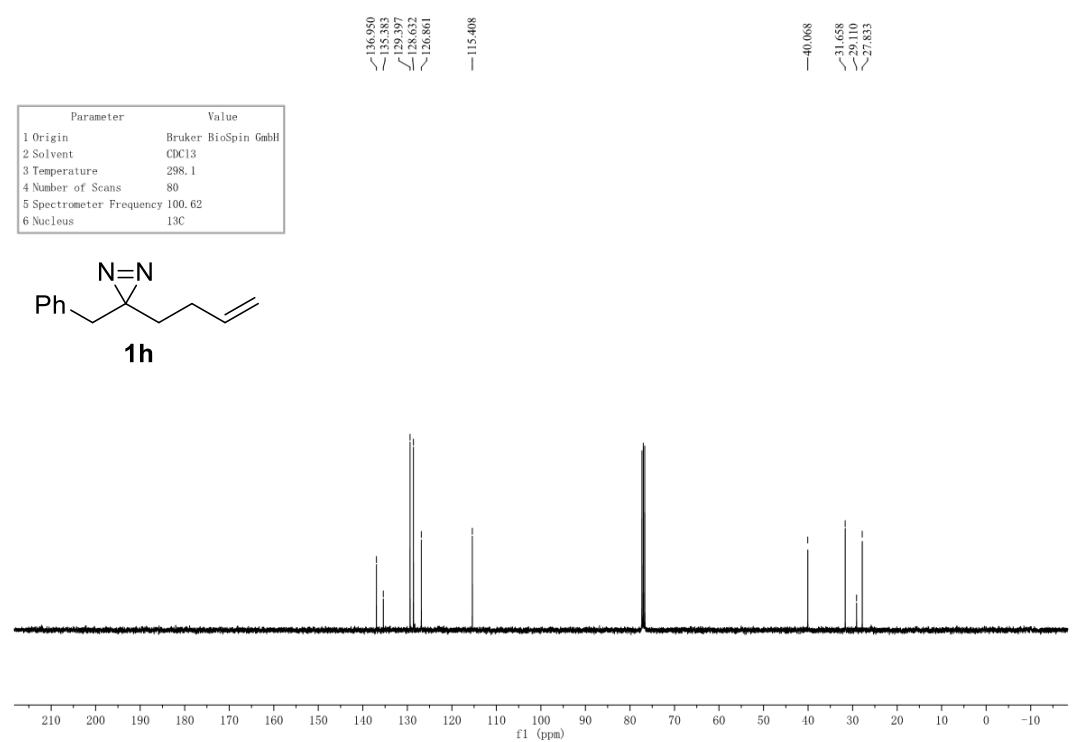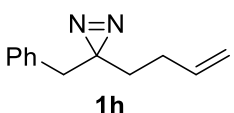

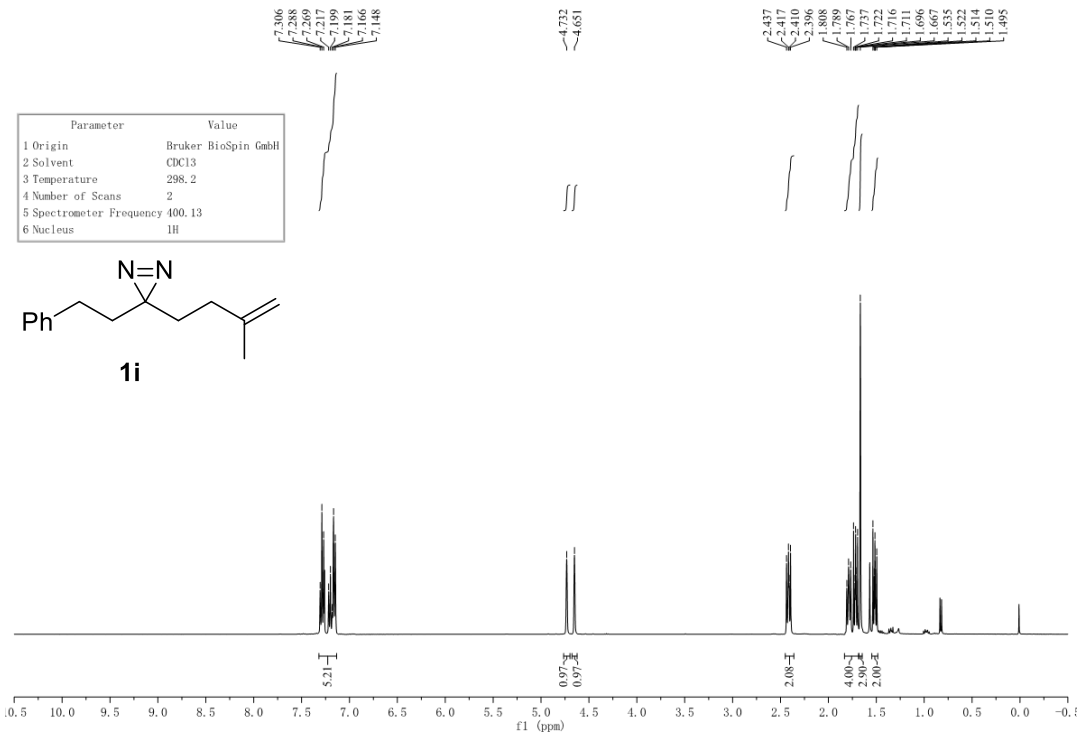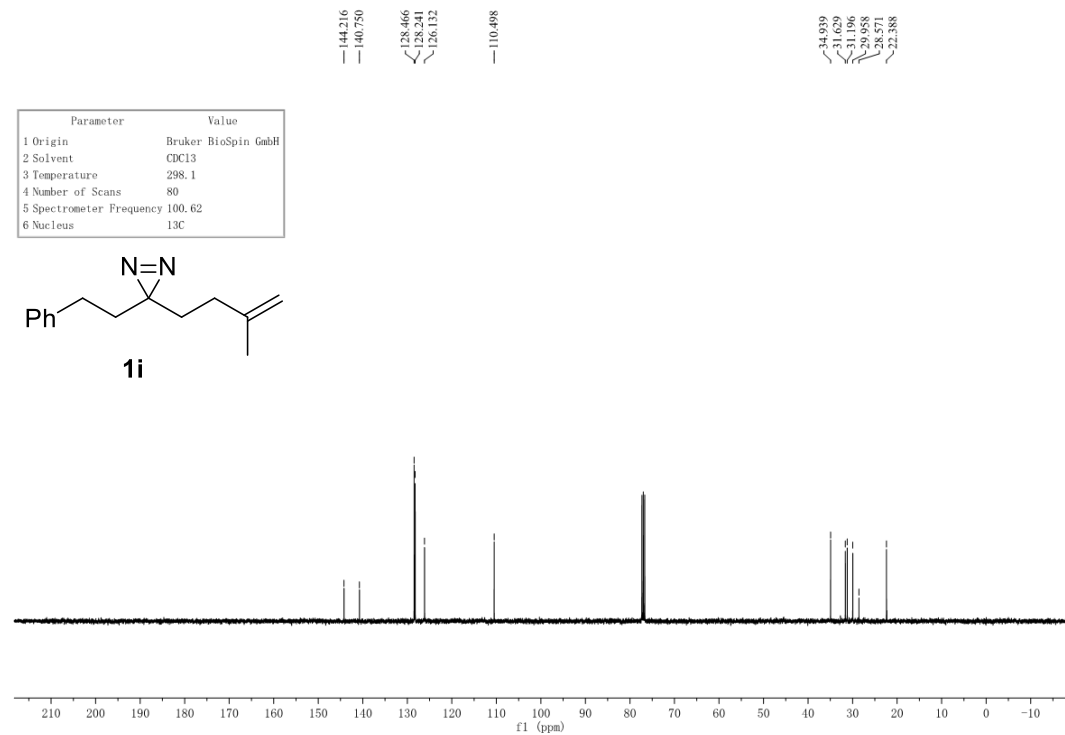

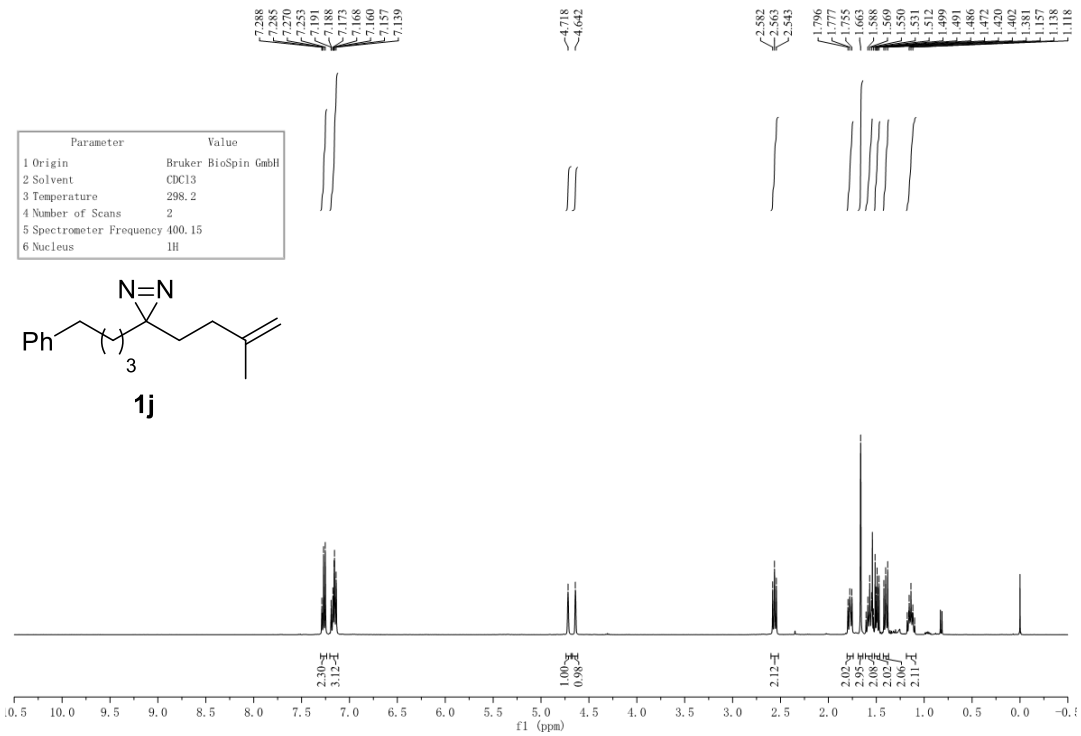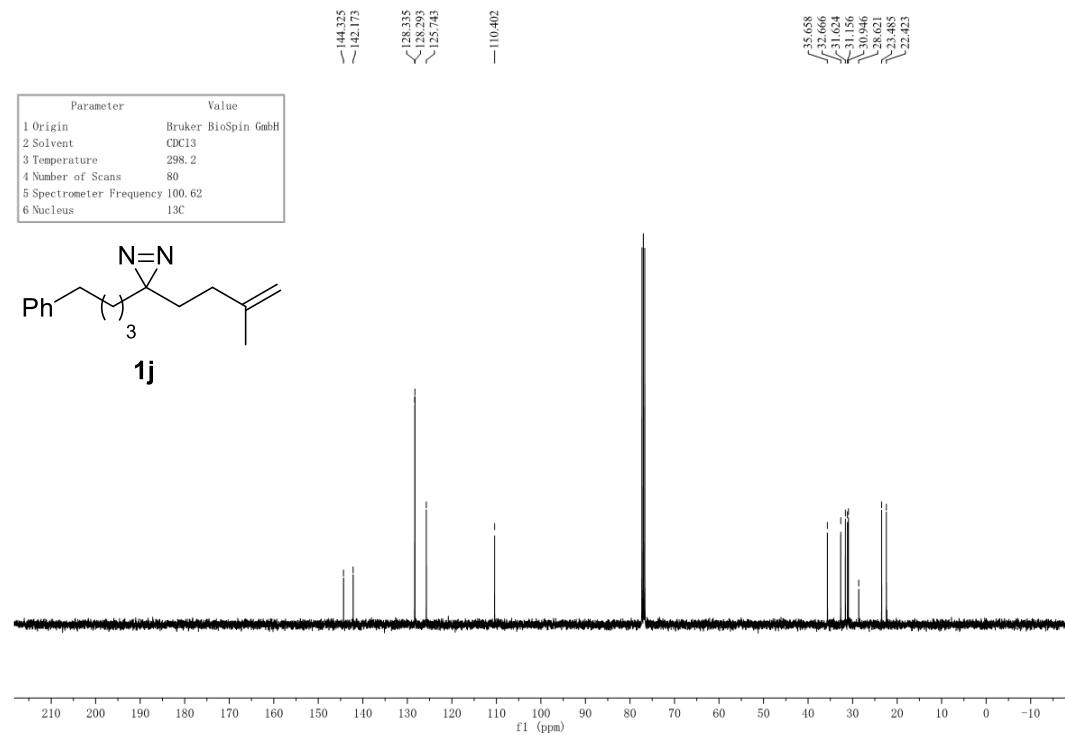



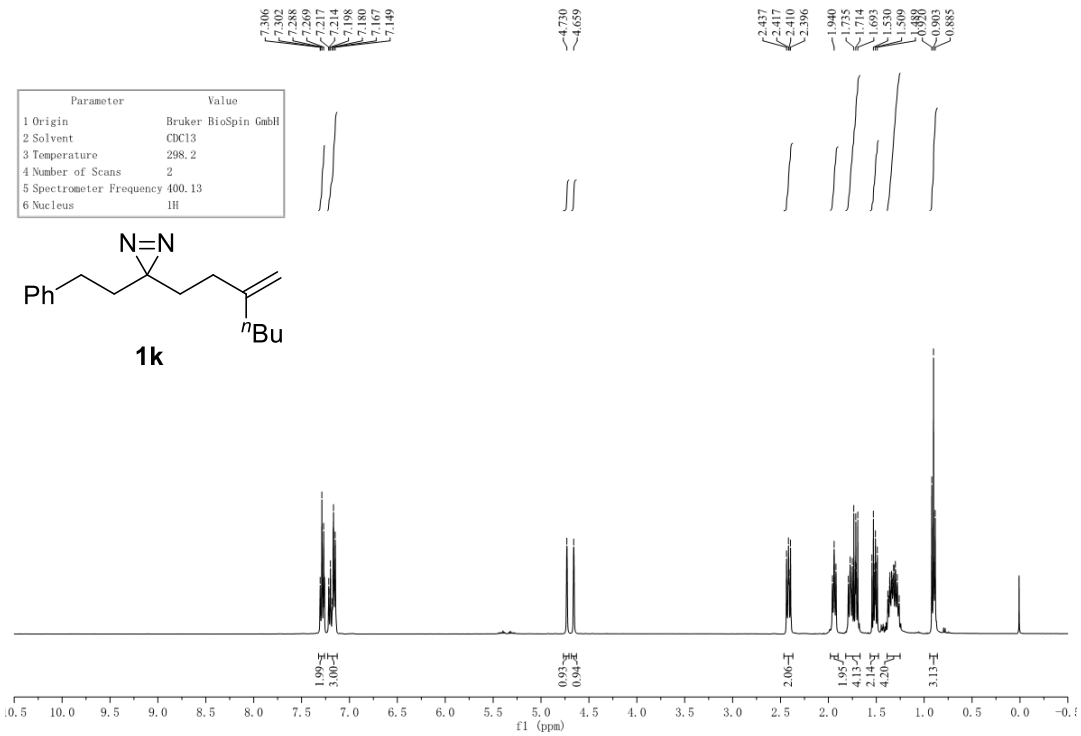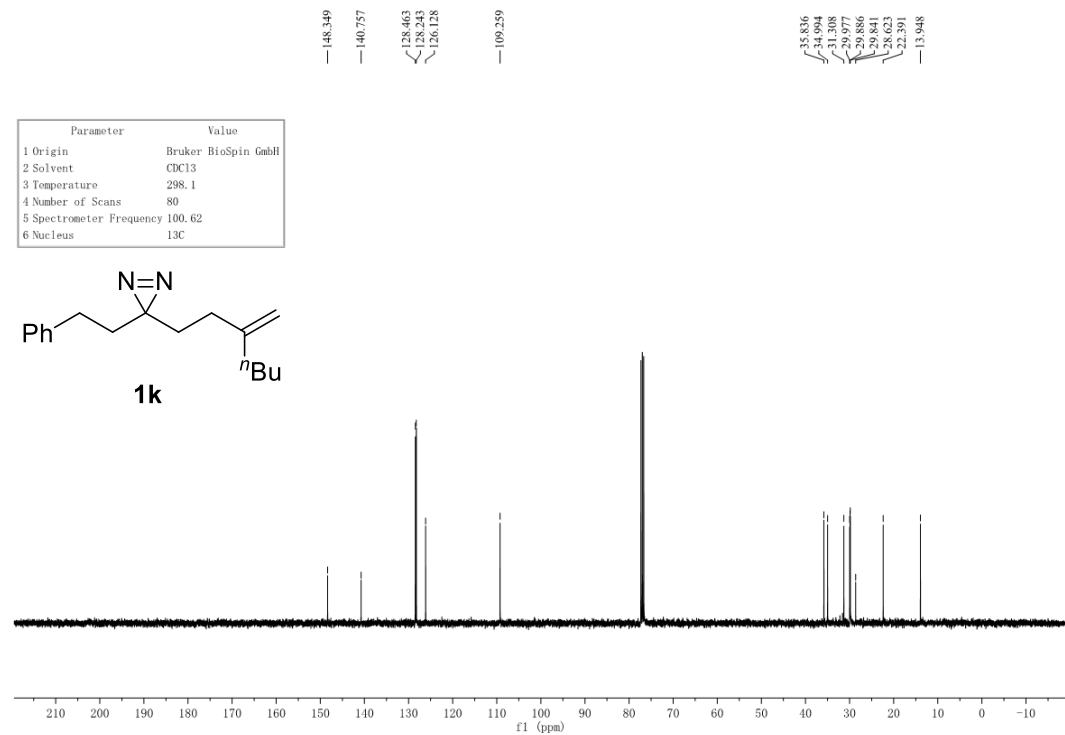

| Parameter                | Value               |
|--------------------------|---------------------|
| 1 Origin                 | Bruker BioSpin GmbH |
| 2 Solvent                | CDCl3               |
| 3 Temperature            | 298.1               |
| 4 Number of Scans        | 2                   |
| 5 Spectrometer Frequency | 400.13              |
| 6 Nucleus                | 1H                  |

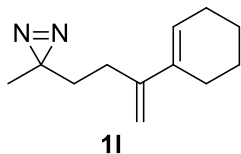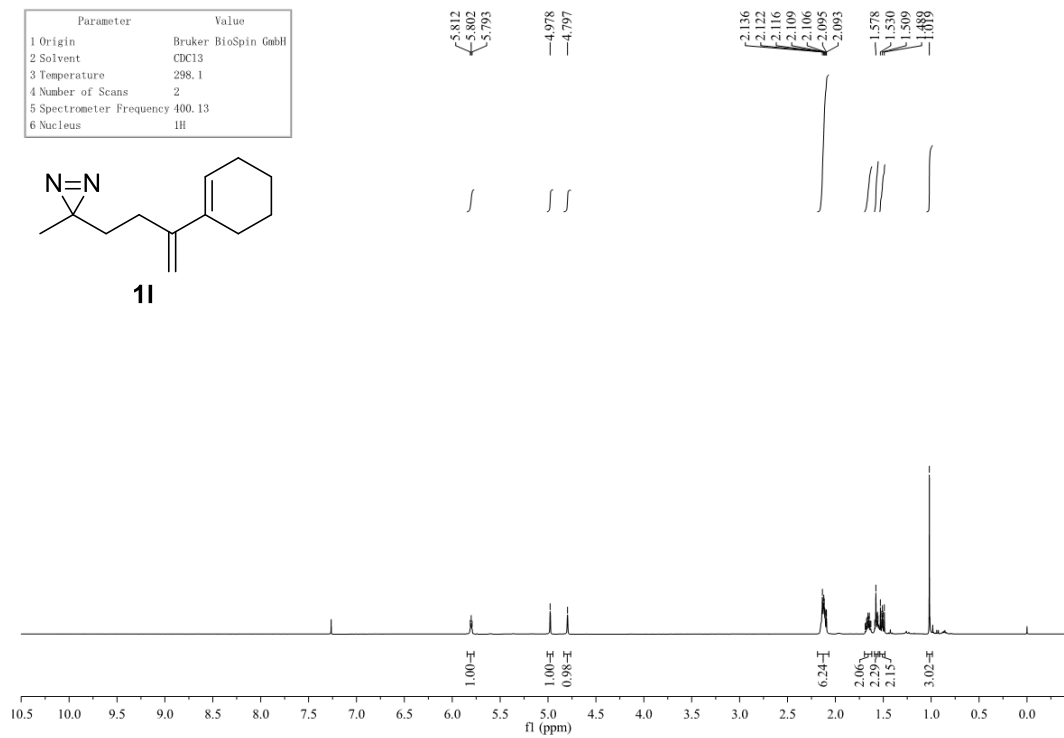

| Parameter                | Value               |
|--------------------------|---------------------|
| 1 Origin                 | Bruker BioSpin GmbH |
| 2 Solvent                | CDCl3               |
| 3 Temperature            | 298.1               |
| 4 Number of Scans        | 80                  |
| 5 Spectrometer Frequency | 100.62              |
| 6 Nucleus                | 13C                 |

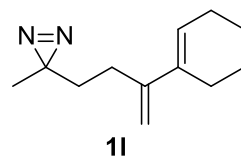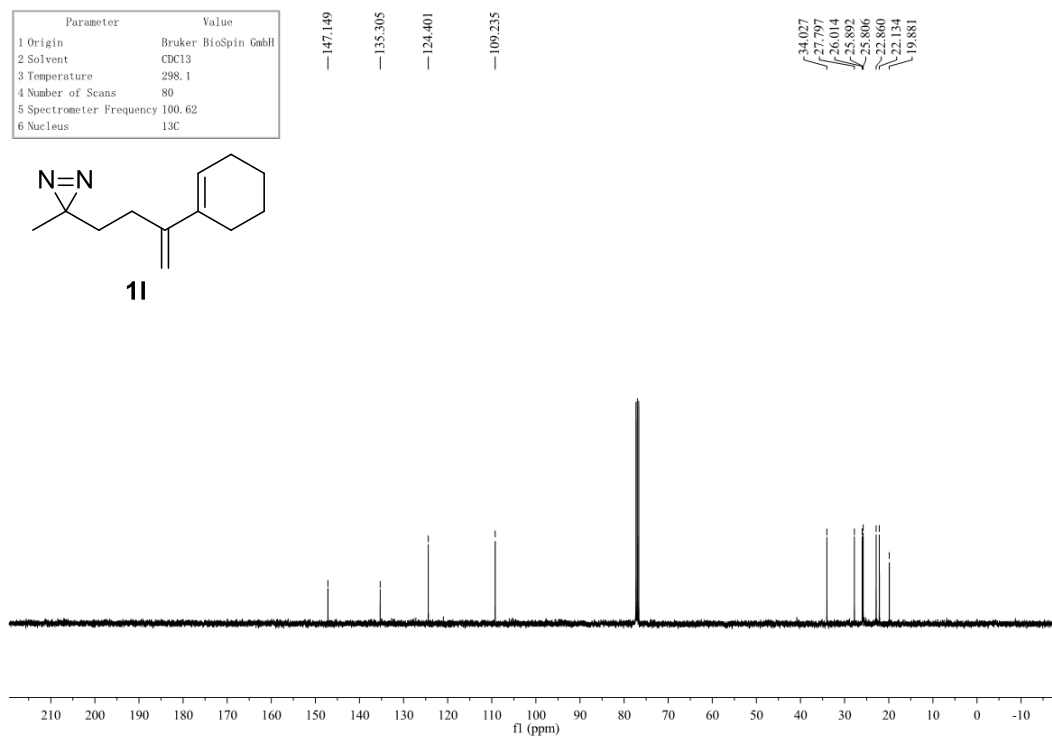

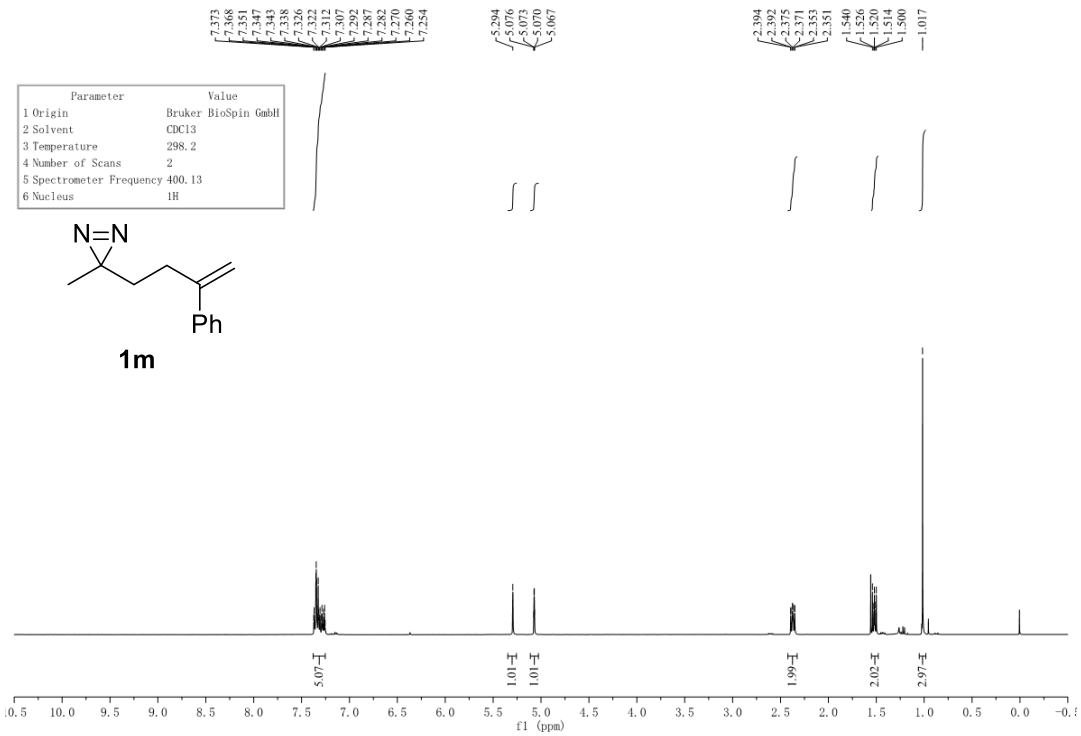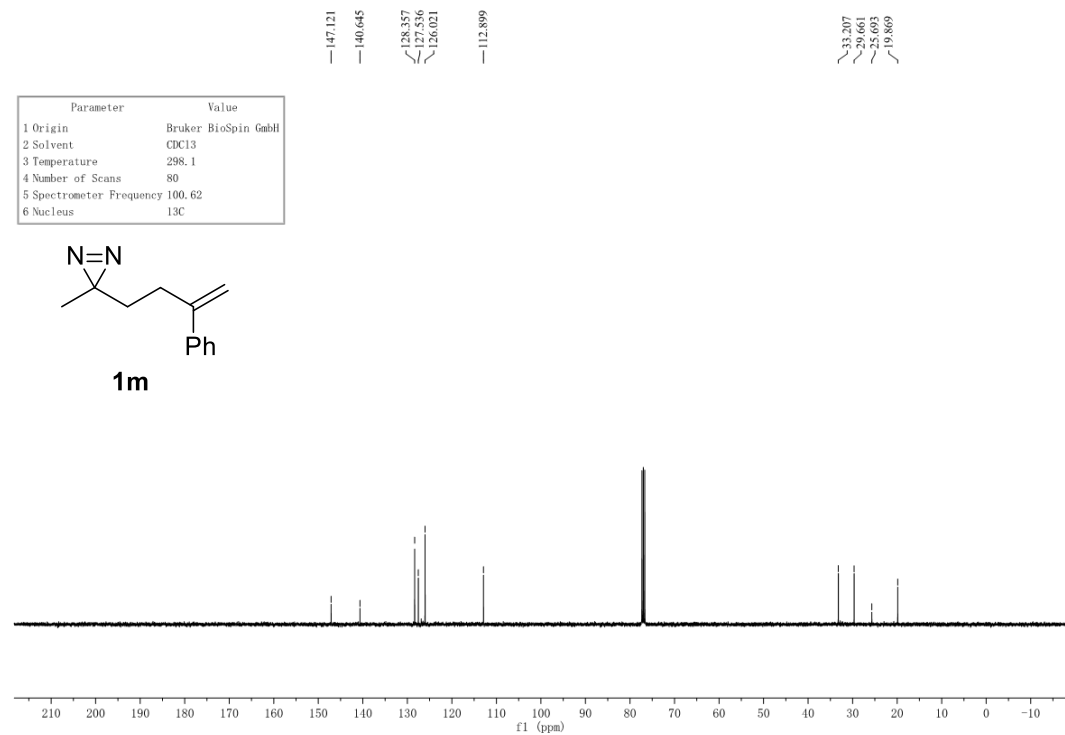

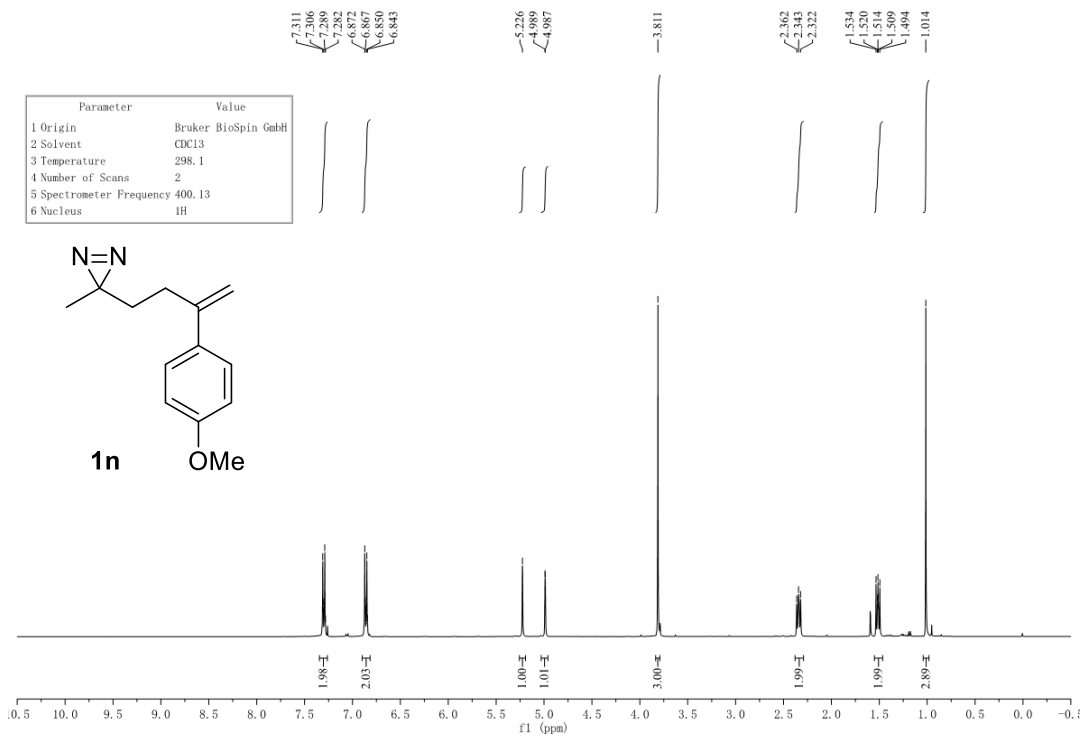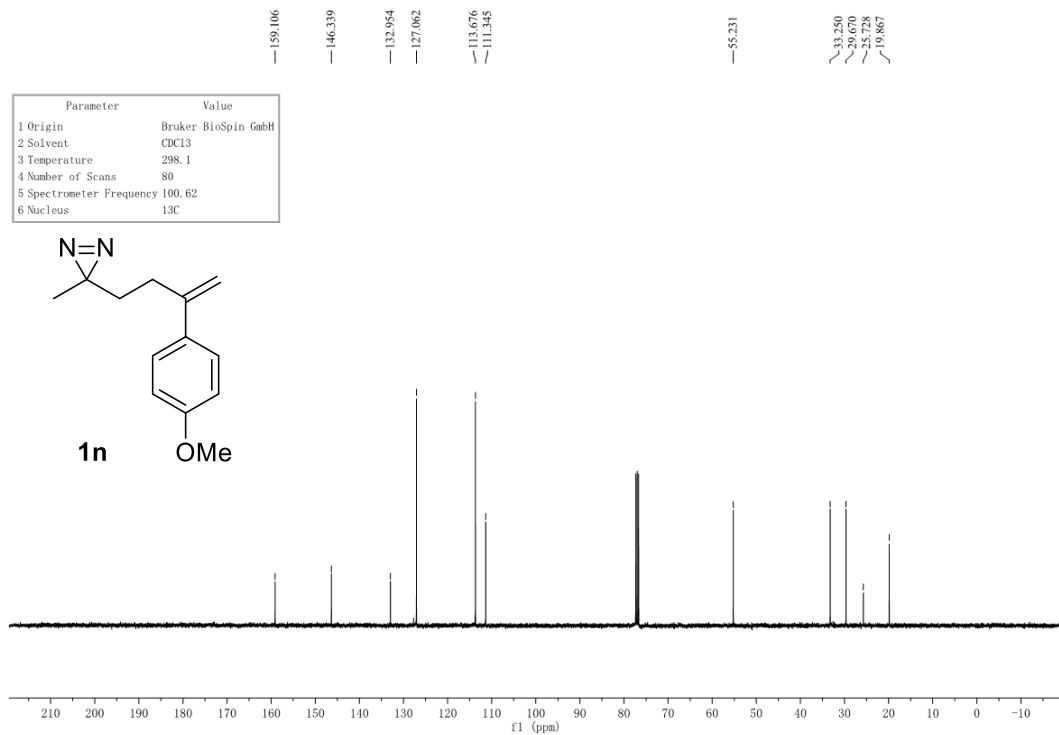

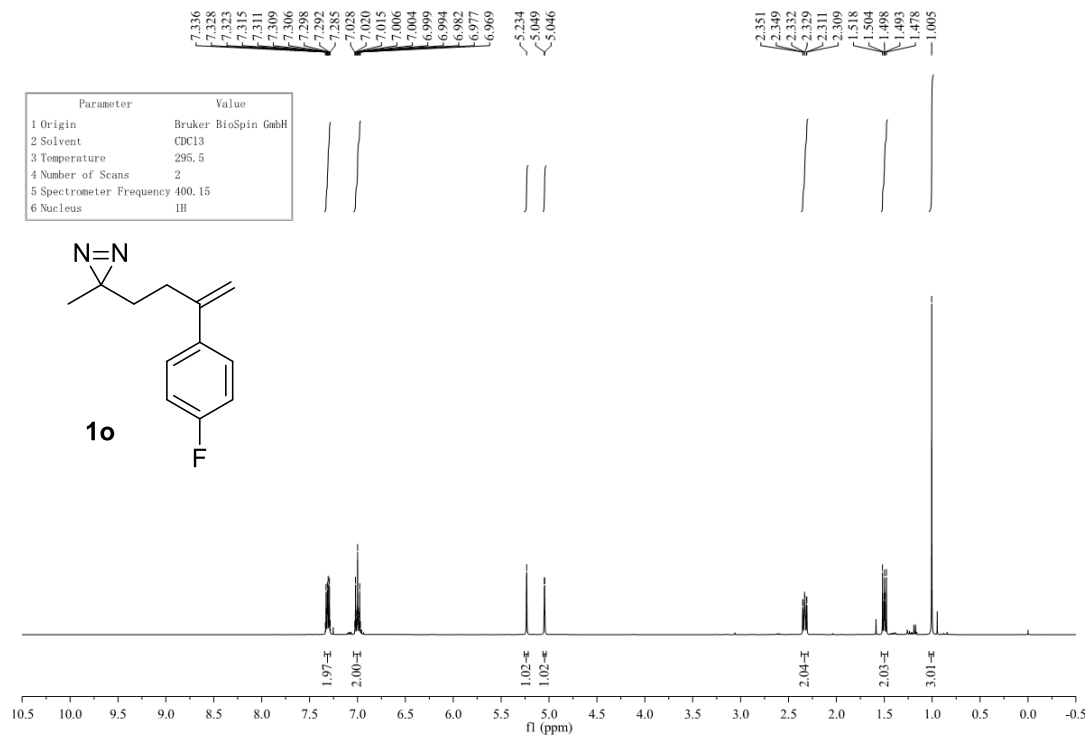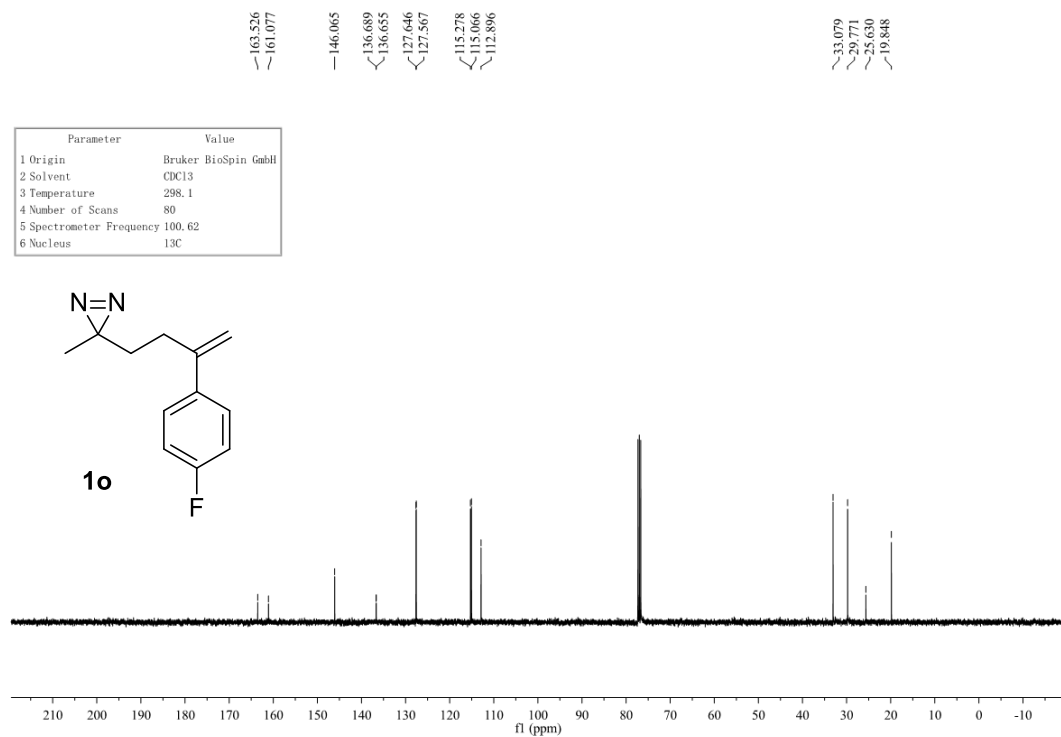

| Parameter                | Value               |
|--------------------------|---------------------|
| 1 Origin                 | Bruker BioSpin GmbH |
| 2 Solvent                | CDCl3               |
| 3 Temperature            | 295.5               |
| 4 Number of Scans        | 2                   |
| 5 Spectrometer Frequency | 376.52              |
| 6 Nucleus                | 19F                 |

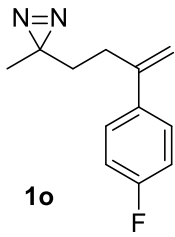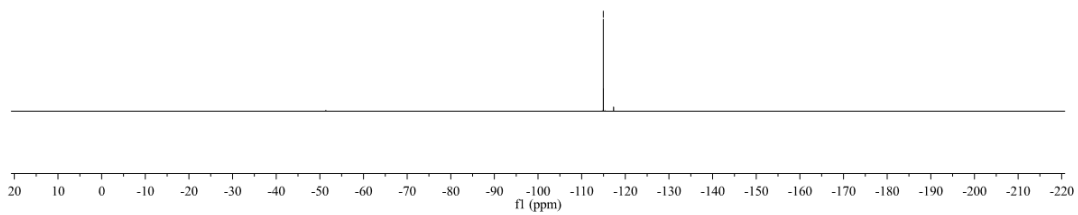

| Parameter                | Value               |
|--------------------------|---------------------|
| 1 Origin                 | Bruker BioSpin GmbH |
| 2 Solvent                | CDCl3               |
| 3 Temperature            | 298.2               |
| 4 Number of Scans        | 2                   |
| 5 Spectrometer Frequency | 400.13              |
| 6 Nucleus                | 1H                  |

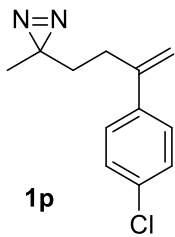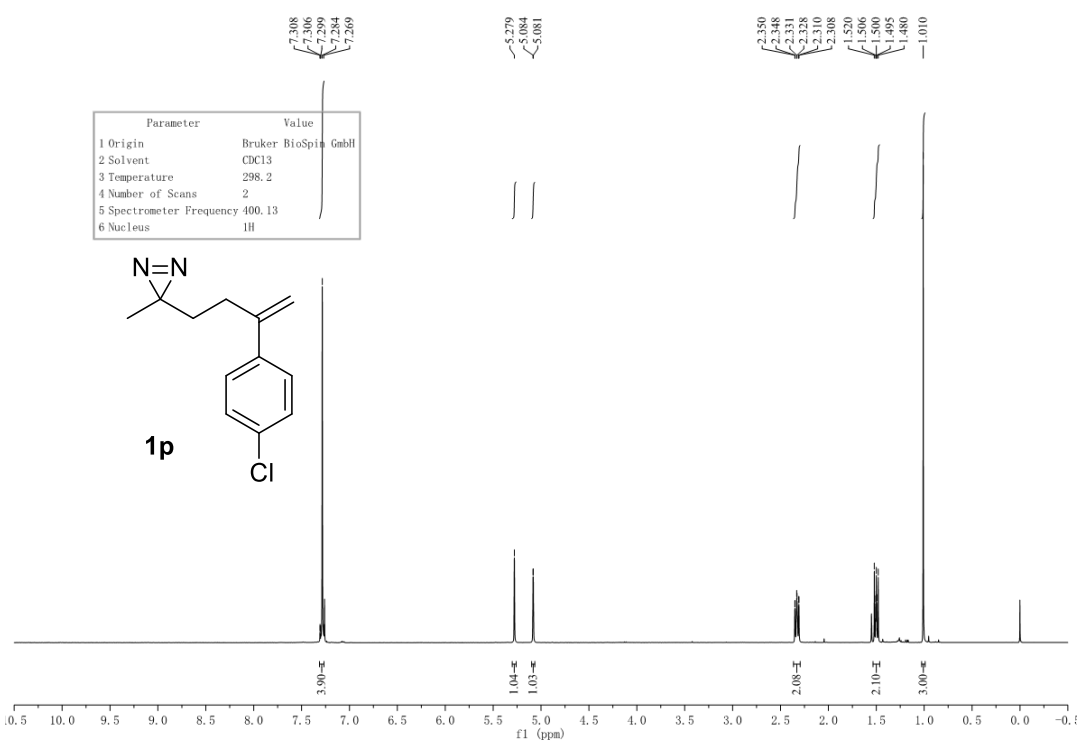

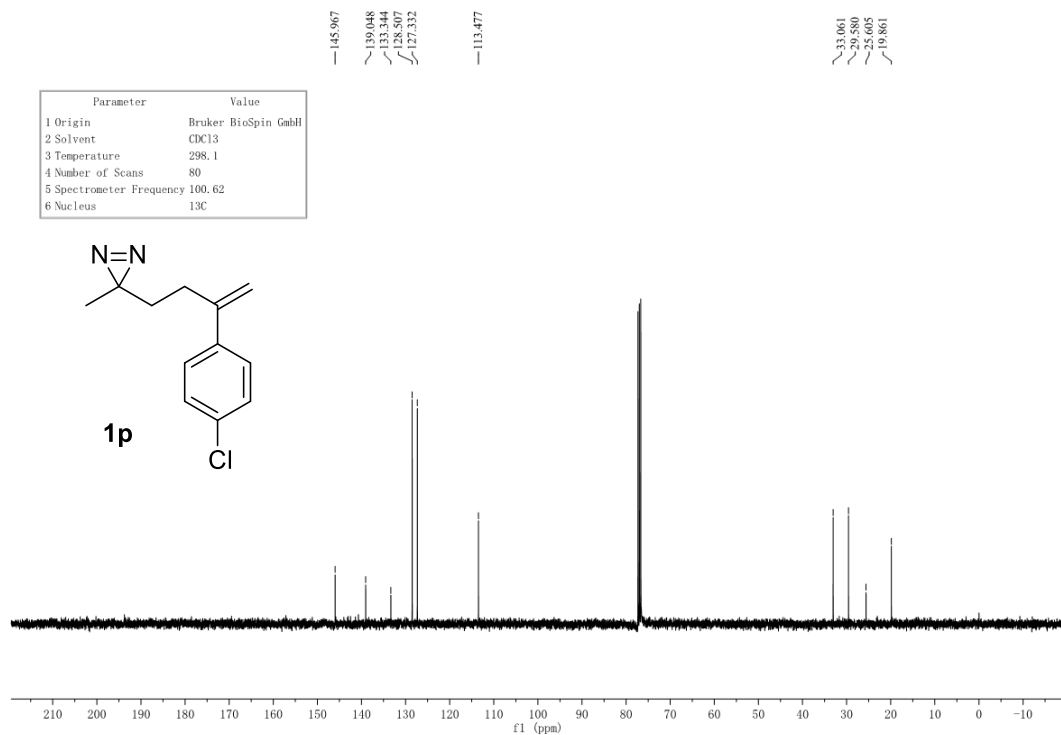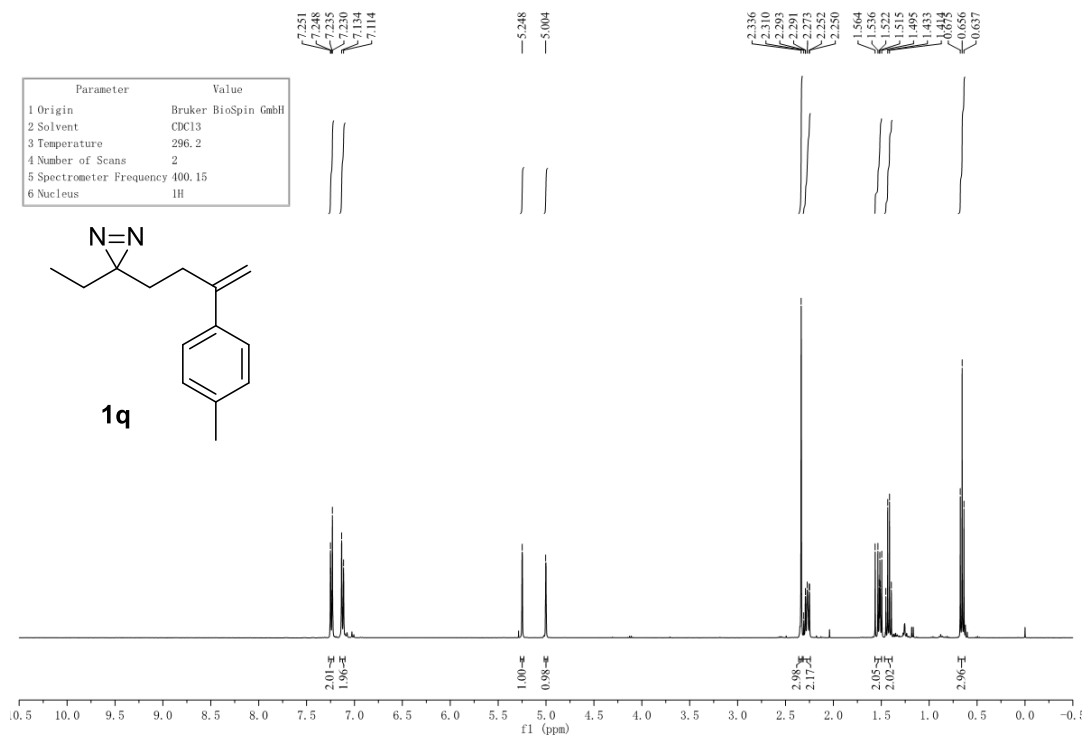

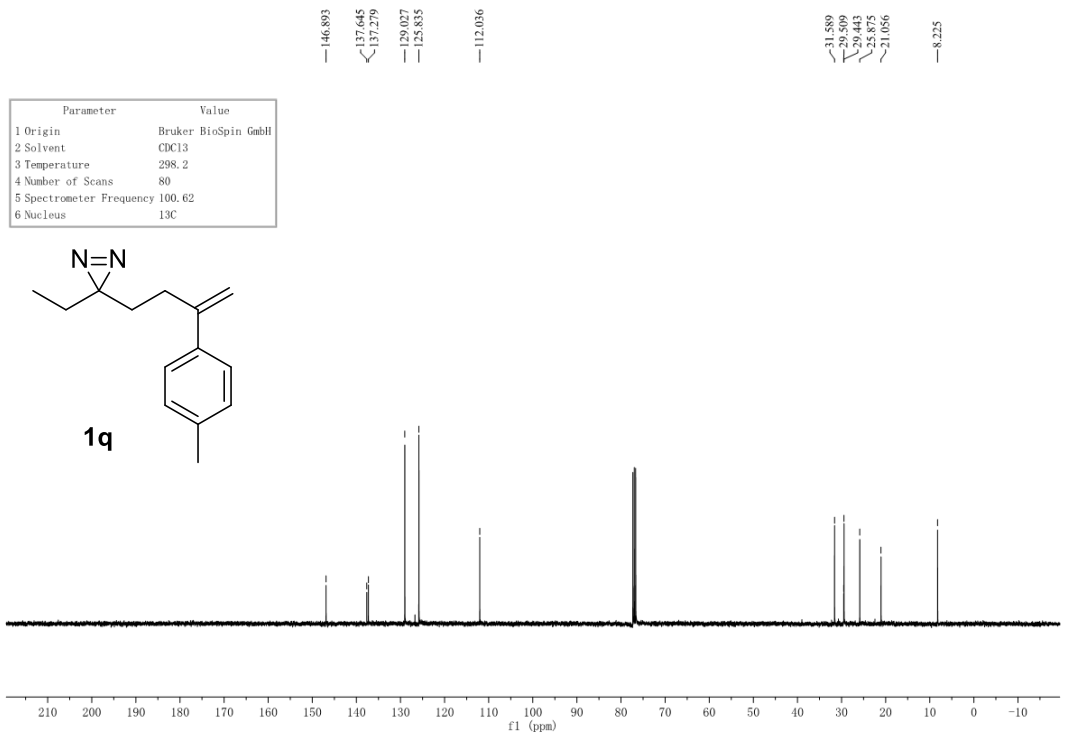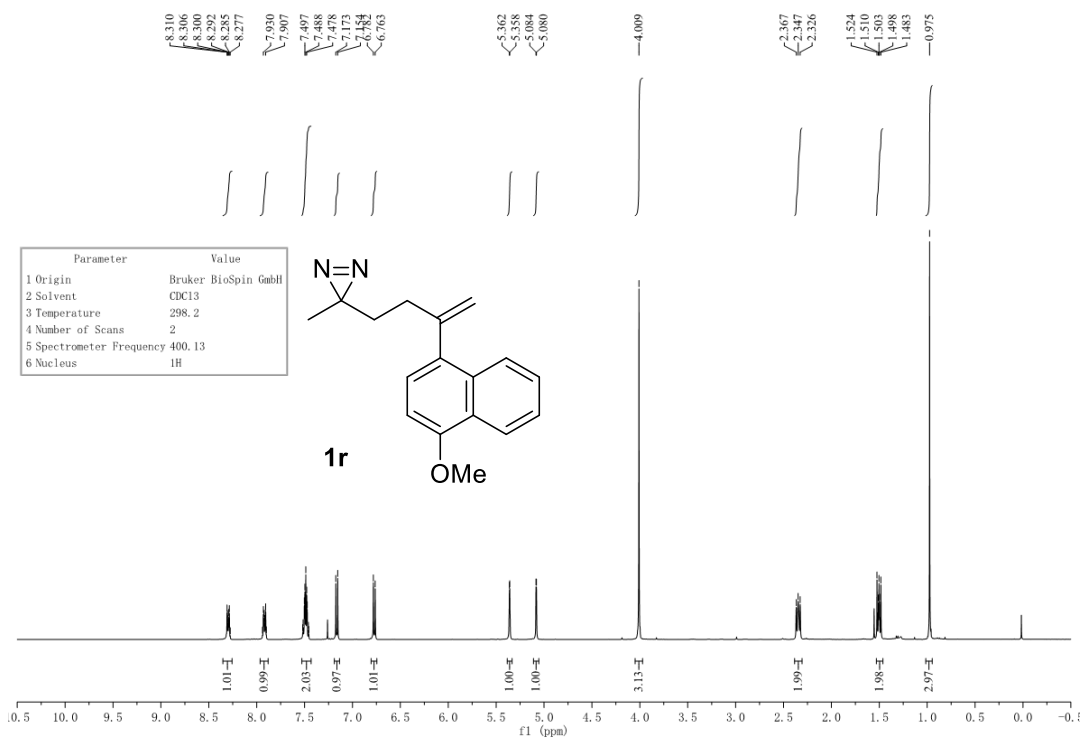



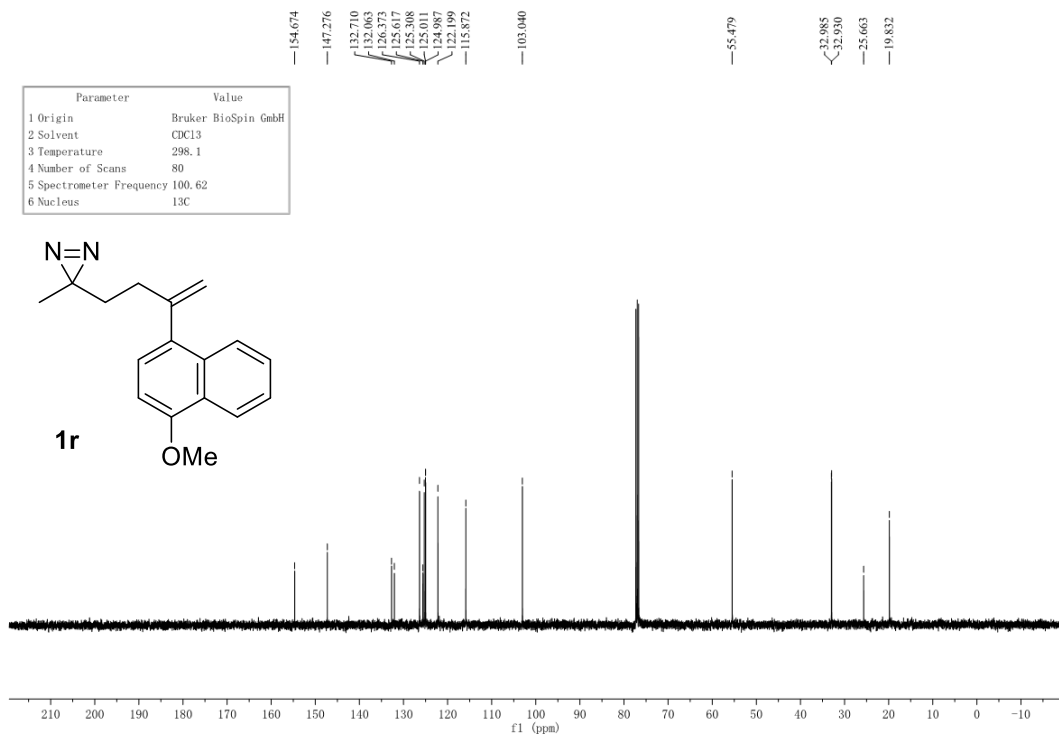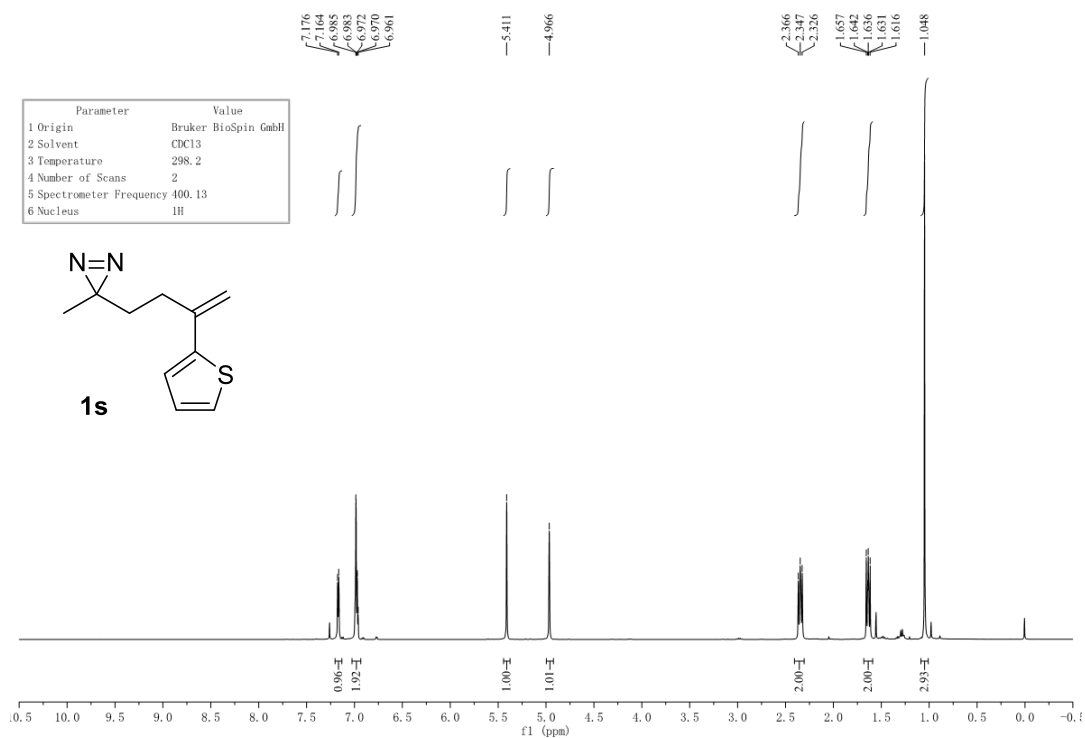

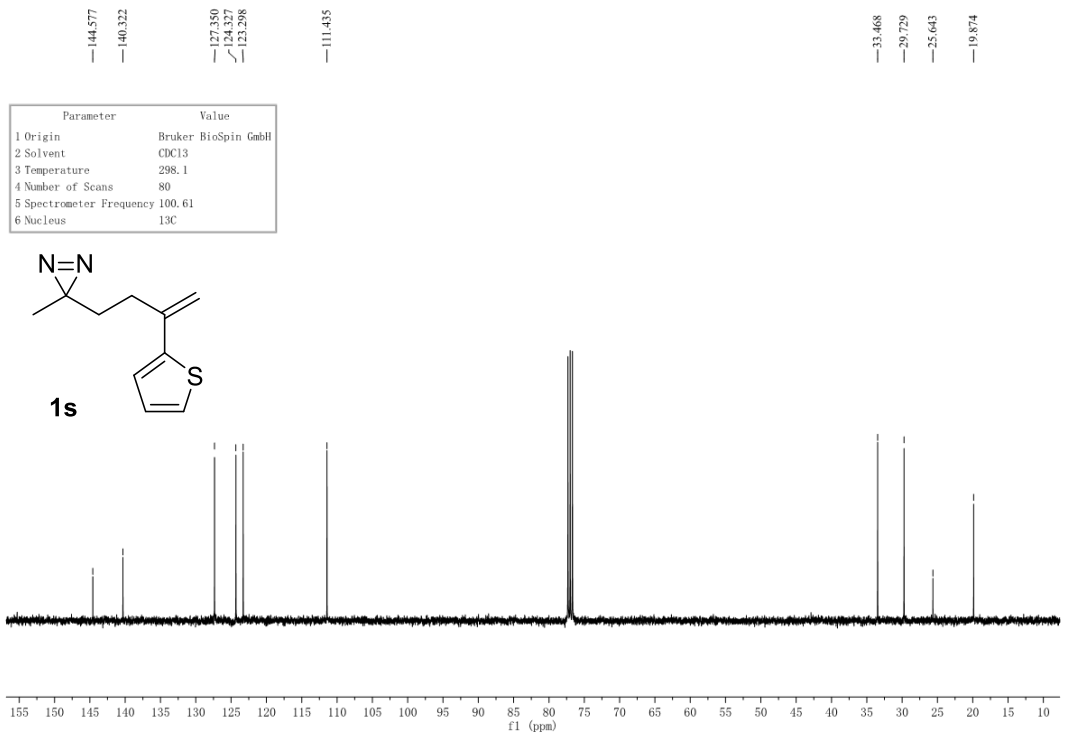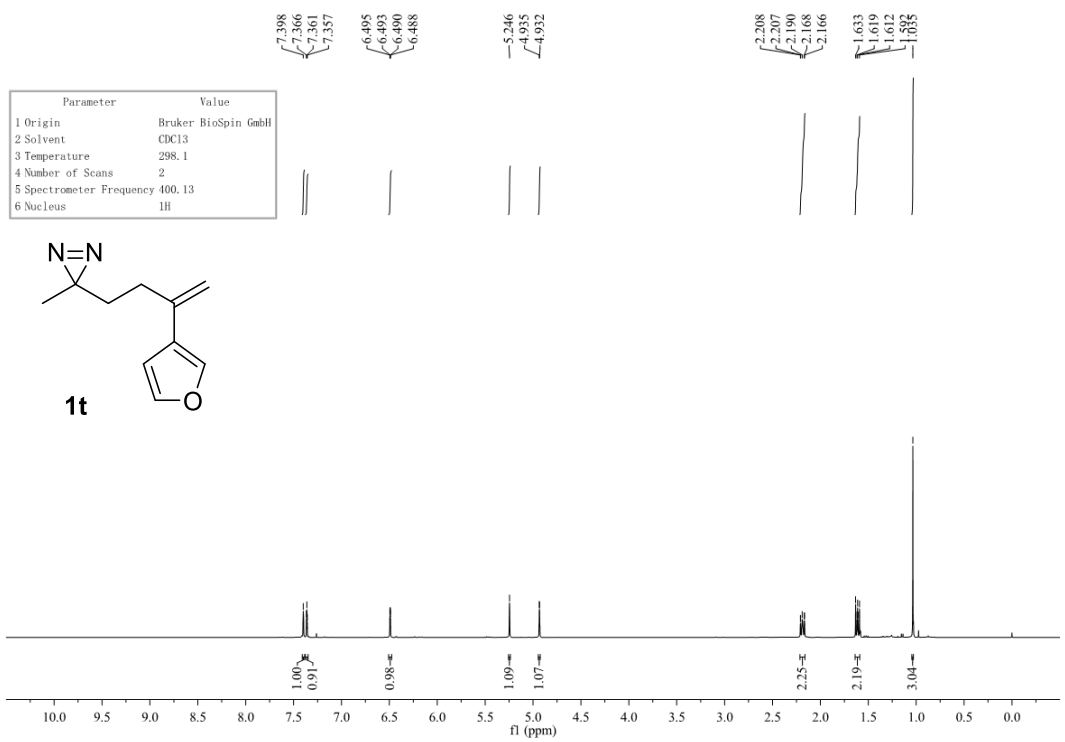

| Parameter                | Value               |
|--------------------------|---------------------|
| 1 Origin                 | Bruker BioSpin GmbH |
| 2 Solvent                | CDCl3               |
| 3 Temperature            | 298.1               |
| 4 Number of Scans        | 80                  |
| 5 Spectrometer Frequency | 100.62              |
| 6 Nucleus                | 13C                 |

143.319  
138.620  
138.069  
126.343  
110.581  
108.096

33.197  
28.960  
25.682  
19.873

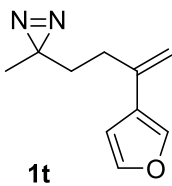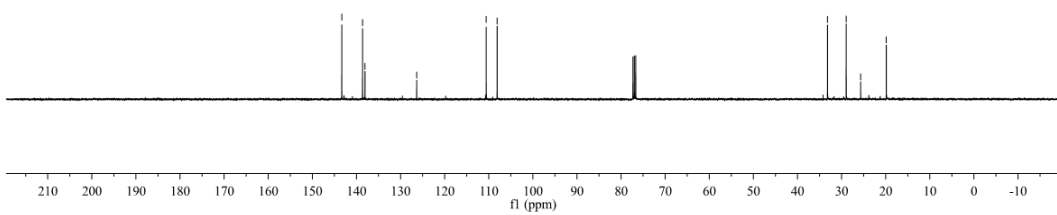

| Parameter                | Value               |
|--------------------------|---------------------|
| 1 Origin                 | Bruker BioSpin GmbH |
| 2 Solvent                | CDCl3               |
| 3 Temperature            | 292.7               |
| 4 Number of Scans        | 16                  |
| 5 Spectrometer Frequency | 400.15              |
| 6 Nucleus                | 1H                  |

5.392  
5.389  
5.386  
1.971  
1.966  
1.961  
1.957  
1.839  
1.817  
1.794  
1.773  
1.622  
1.598  
1.594  
1.580  
1.569  
1.563  
1.558  
1.555  
1.551  
1.540  
1.536  
1.526  
1.521  
1.513  
1.444  
1.430  
1.423  
1.419  
0.992

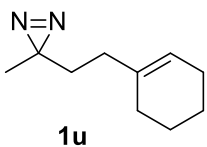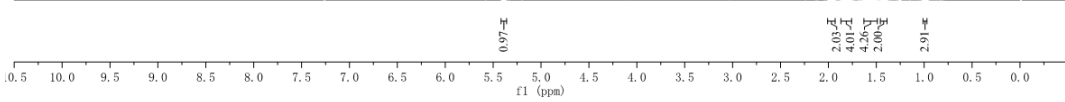

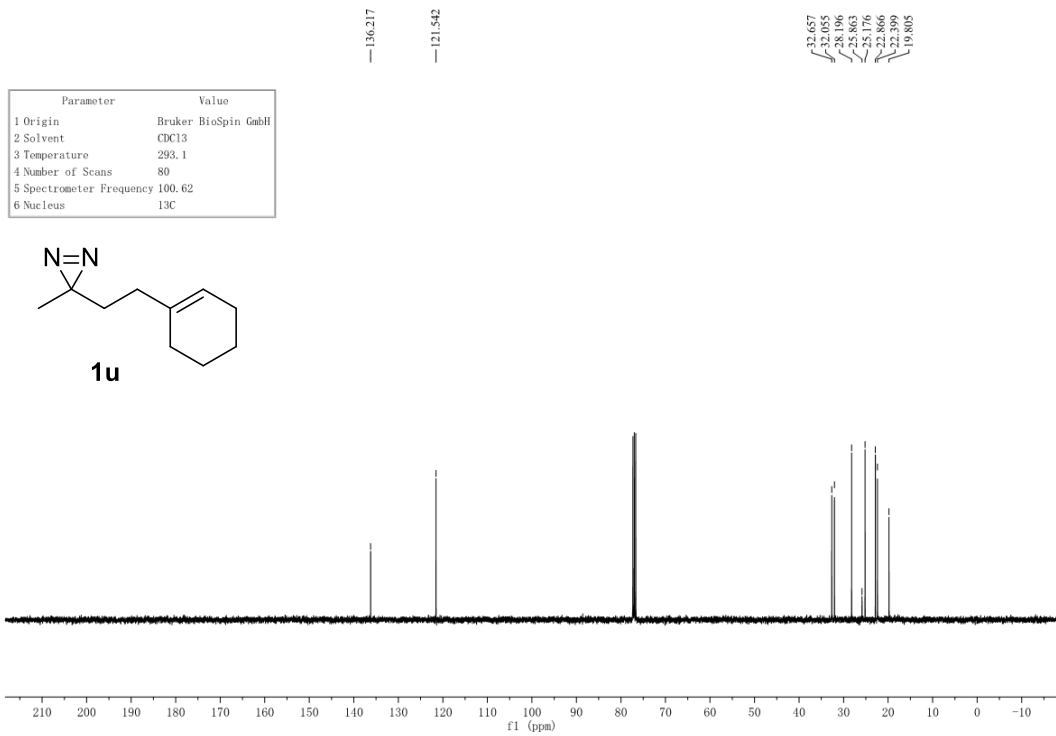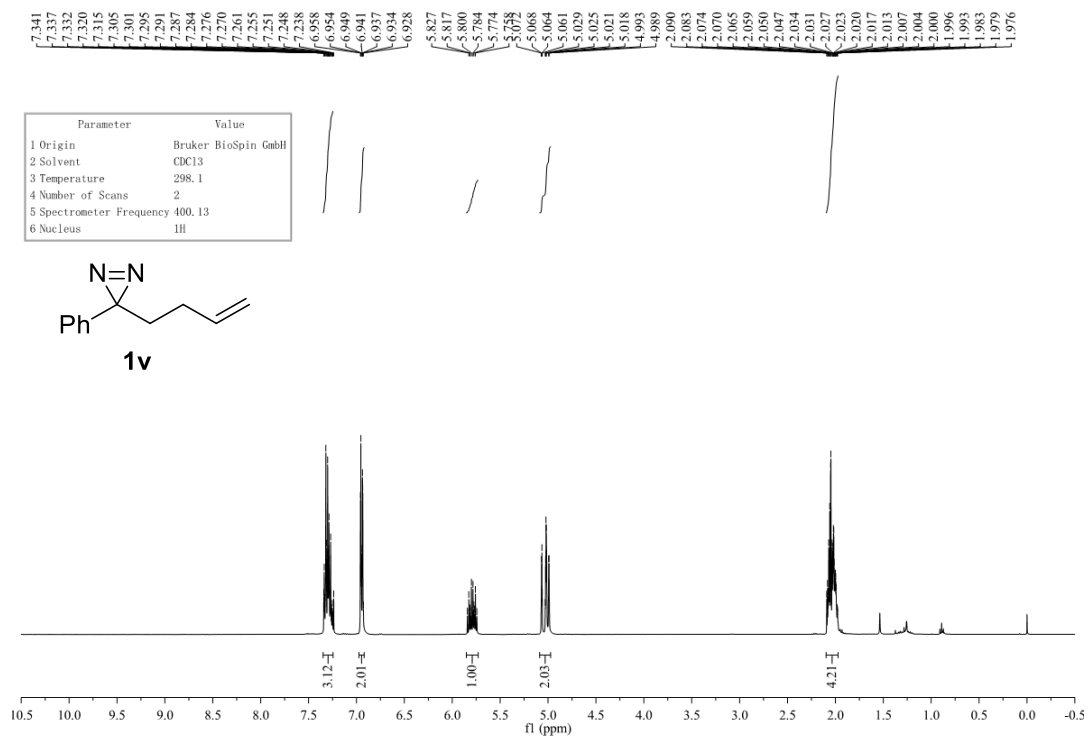

| Parameter                | Value               |
|--------------------------|---------------------|
| 1 Origin                 | Bruker BioSpin GmbH |
| 2 Solvent                | CDCl3               |
| 3 Temperature            | 298.1               |
| 4 Number of Scans        | 40                  |
| 5 Spectrometer Frequency | 100.62              |
| 6 Nucleus                | 13C                 |

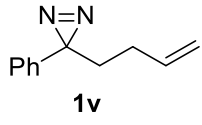

138.809  
136.807  
128.258  
127.386  
125.582  
115.543

29.609  
28.976  
28.068

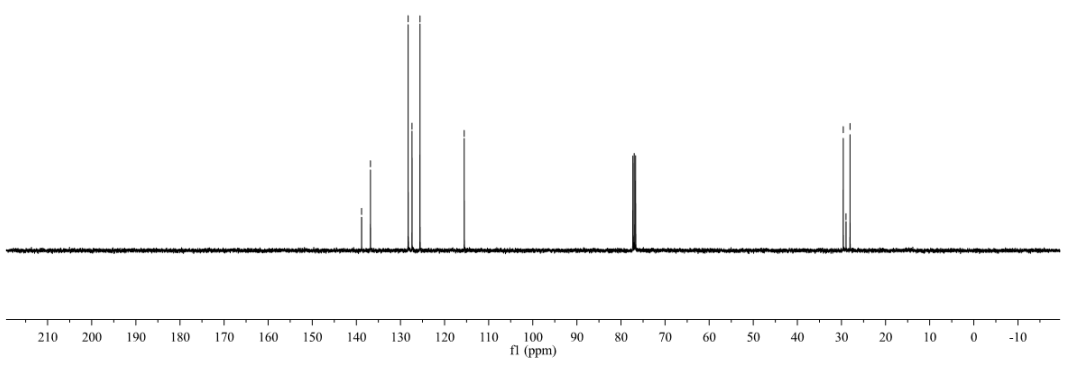

| Parameter                | Value               |
|--------------------------|---------------------|
| 1 Origin                 | Bruker BioSpin GmbH |
| 2 Solvent                | CDCl3               |
| 3 Temperature            | 298.2               |
| 4 Number of Scans        | 2                   |
| 5 Spectrometer Frequency | 400.13              |
| 6 Nucleus                | 1H                  |

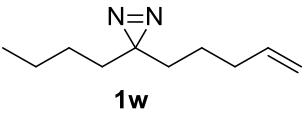

5.761  
5.745  
5.719  
5.702  
5.677  
5.660  
5.001  
4.997  
4.992  
4.950  
4.946  
4.921  
4.918  
4.916

2.012  
2.009  
2.006  
1.991  
1.973  
1.959  
1.956  
1.952  
1.359  
1.351  
1.340  
1.329  
1.319  
1.251  
1.232  
1.179  
1.068  
1.049  
0.880  
0.842  
0.823

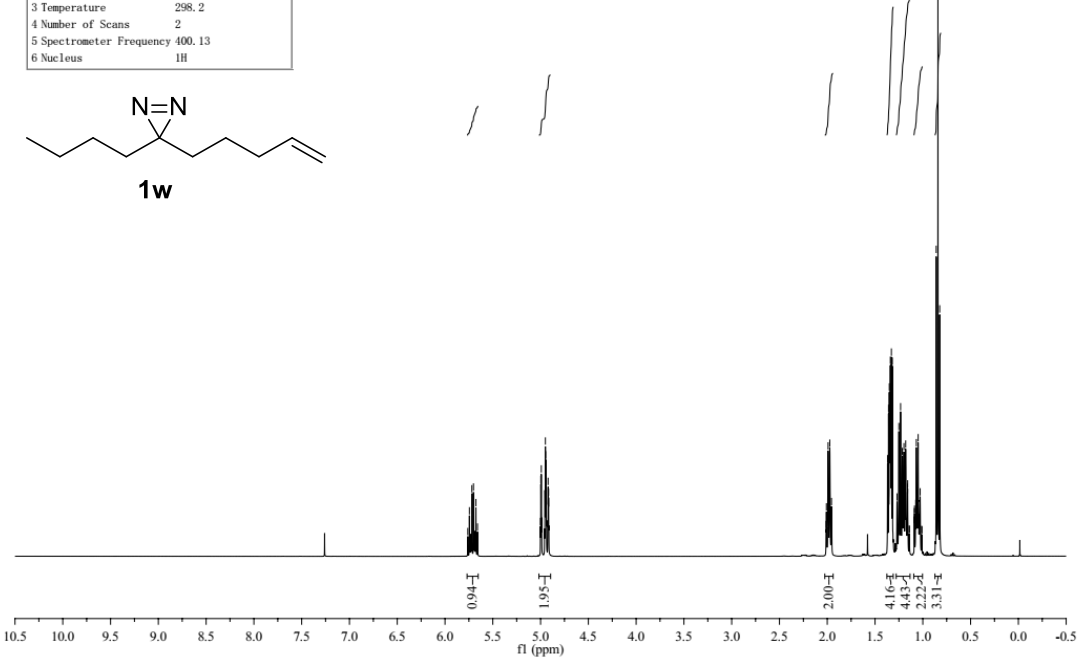

| Parameter                | Value               |
|--------------------------|---------------------|
| 1 Origin                 | Bruker BioSpin GmbH |
| 2 Solvent                | CDCl3               |
| 3 Temperature            | 298.2               |
| 4 Number of Scans        | 10                  |
| 5 Spectrometer Frequency | 100.61              |
| 6 Nucleus                | 13C                 |

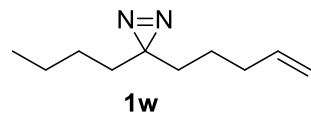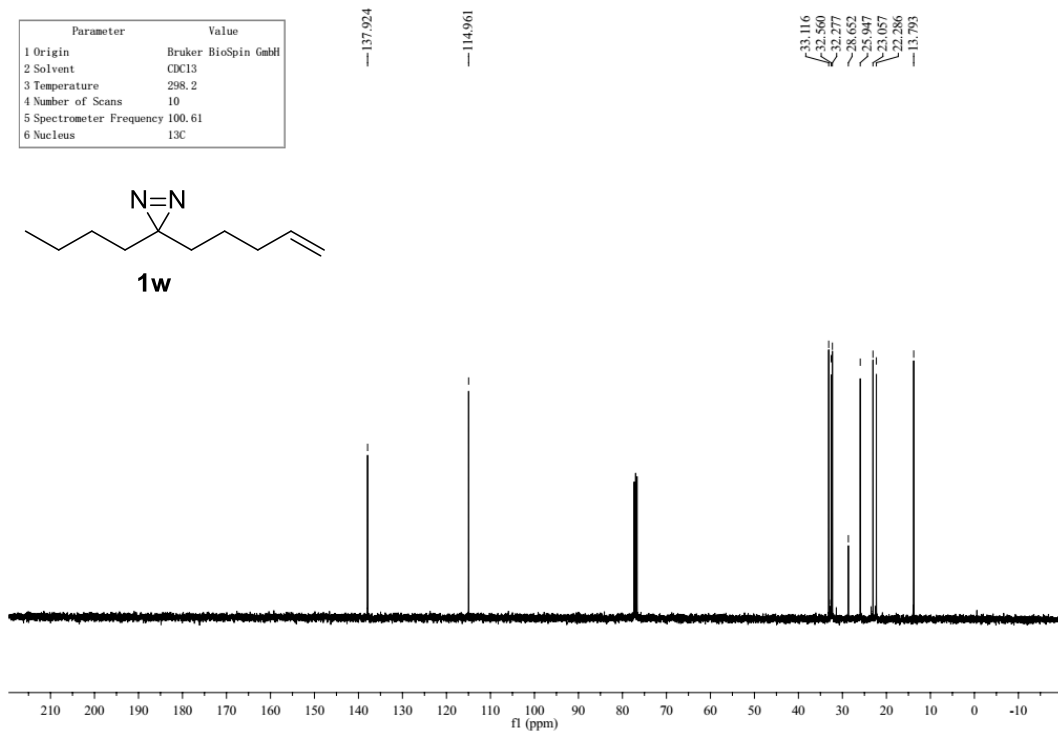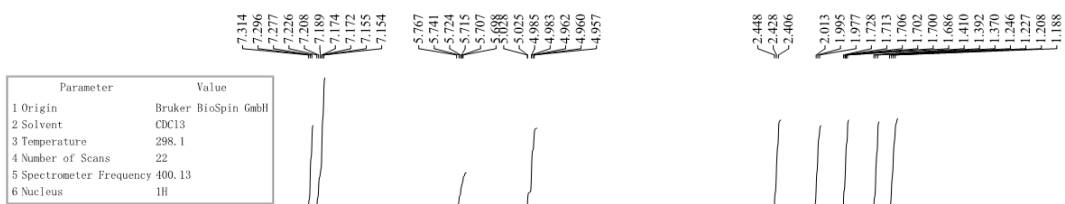

| Parameter                | Value               |
|--------------------------|---------------------|
| 1 Origin                 | Bruker BioSpin GmbH |
| 2 Solvent                | CDCl3               |
| 3 Temperature            | 298.1               |
| 4 Number of Scans        | 22                  |
| 5 Spectrometer Frequency | 400.13              |
| 6 Nucleus                | 1H                  |

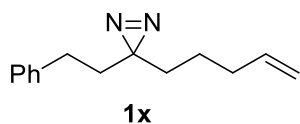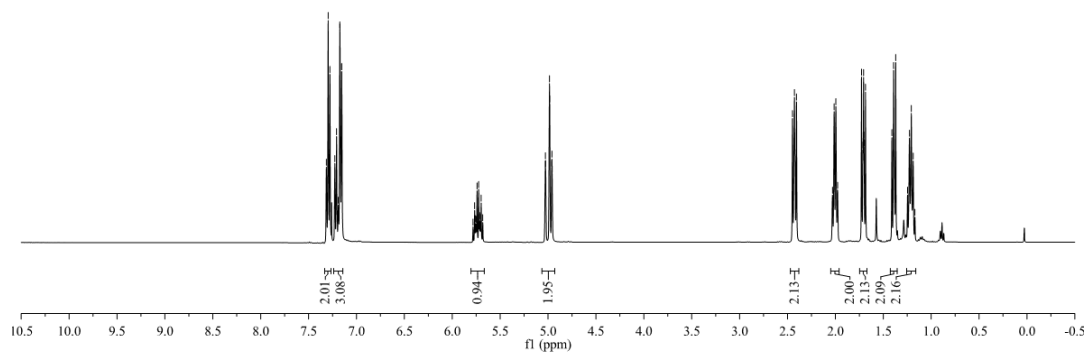

| Parameter                | Value               |
|--------------------------|---------------------|
| 1 Origin                 | Bruker BioSpin GmbH |
| 2 Solvent                | CDCl3               |
| 3 Temperature            | 298.1               |
| 4 Number of Scans        | 80                  |
| 5 Spectrometer Frequency | 100.62              |
| 6 Nucleus                | 13C                 |

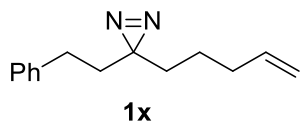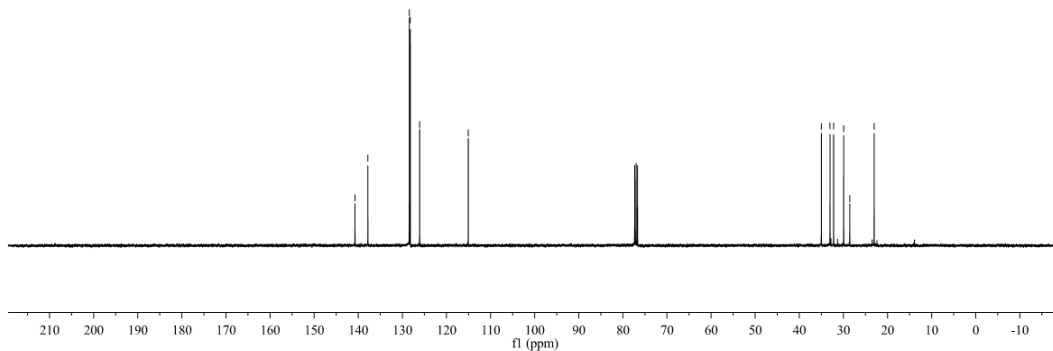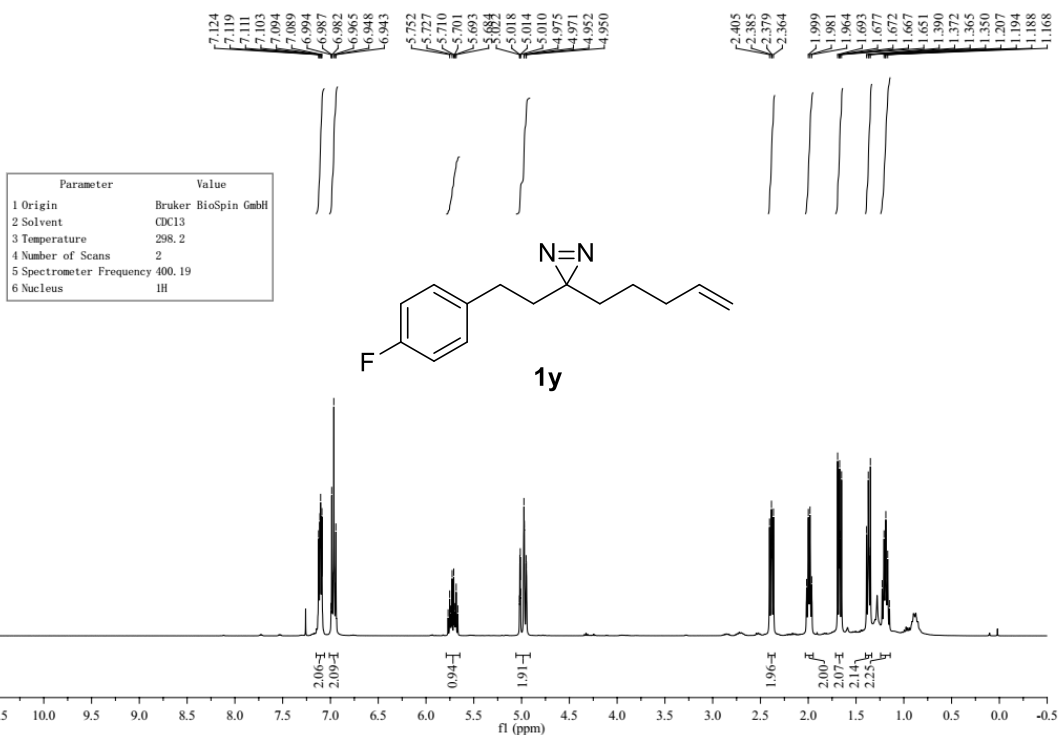

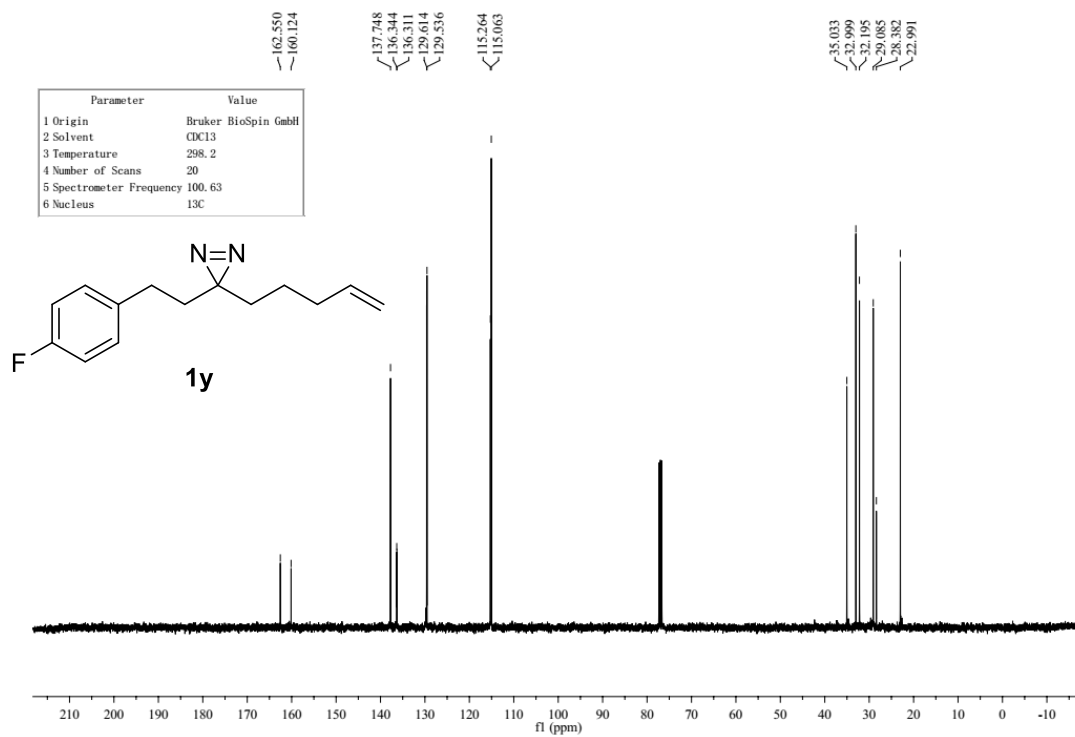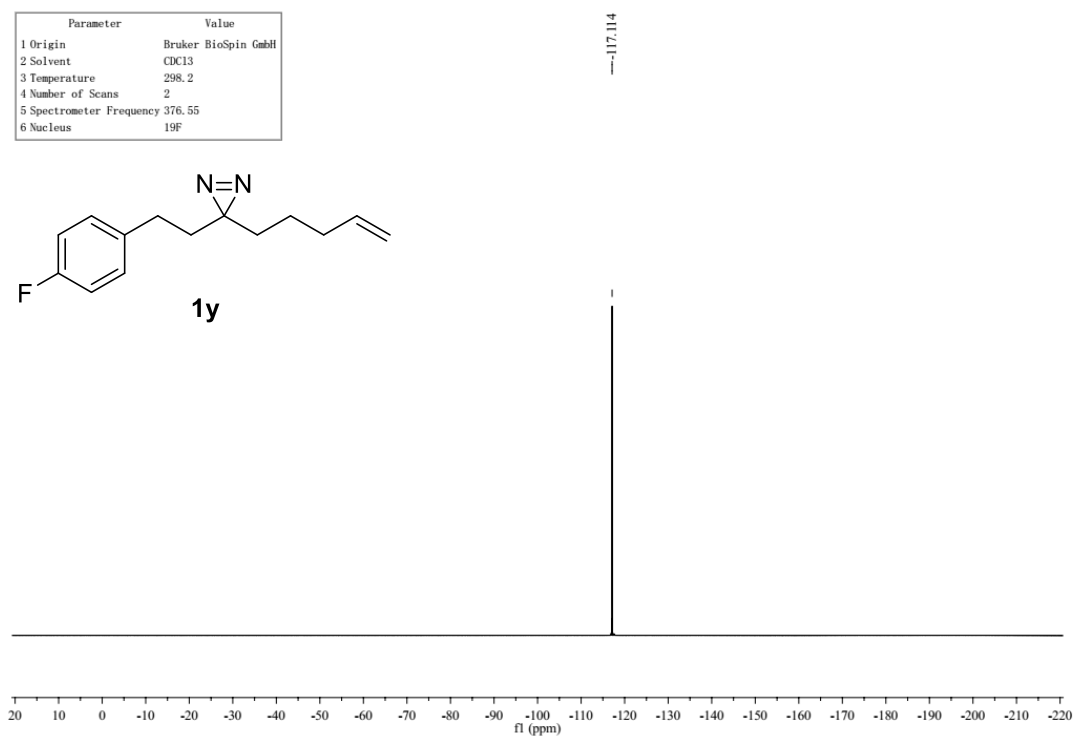



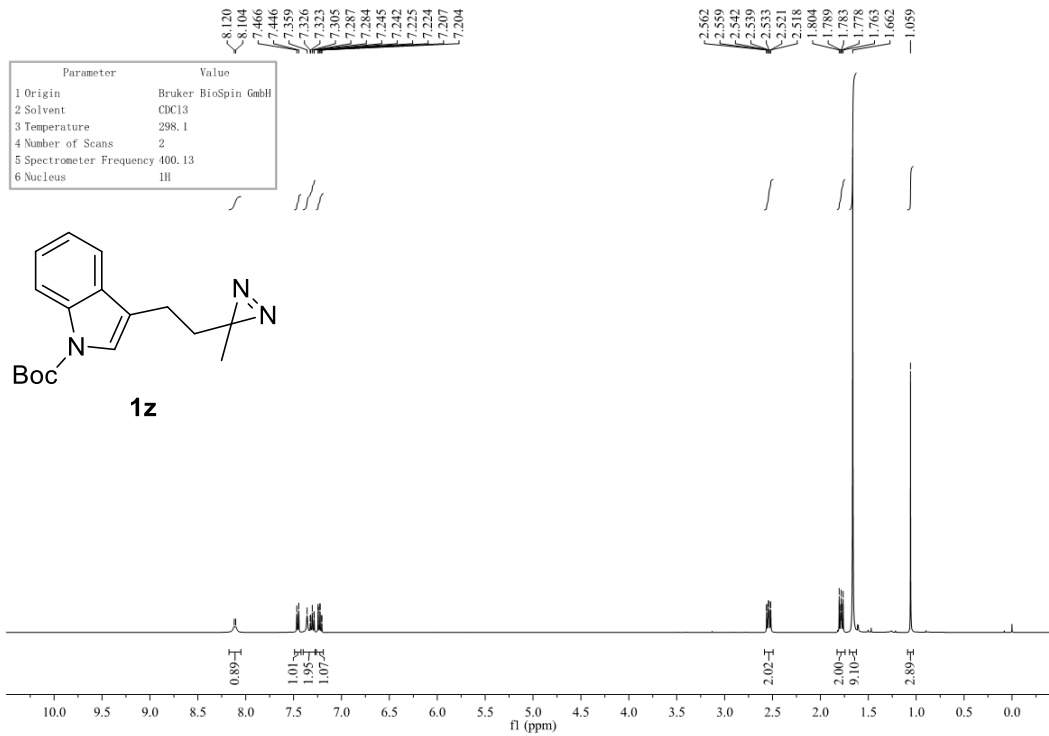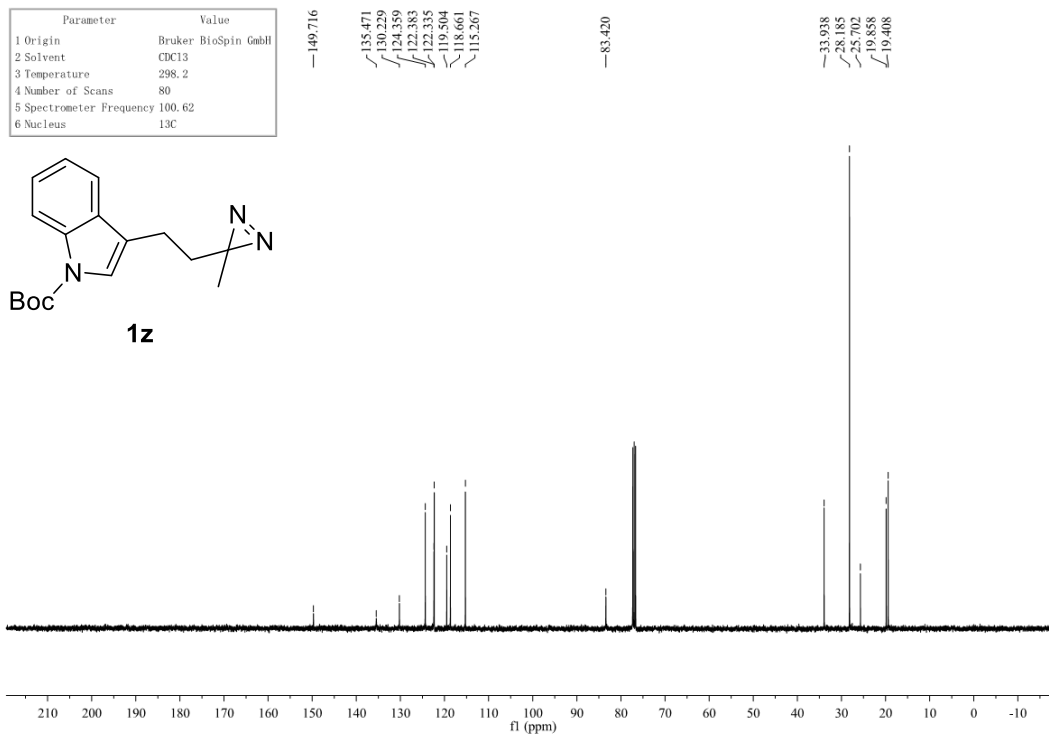

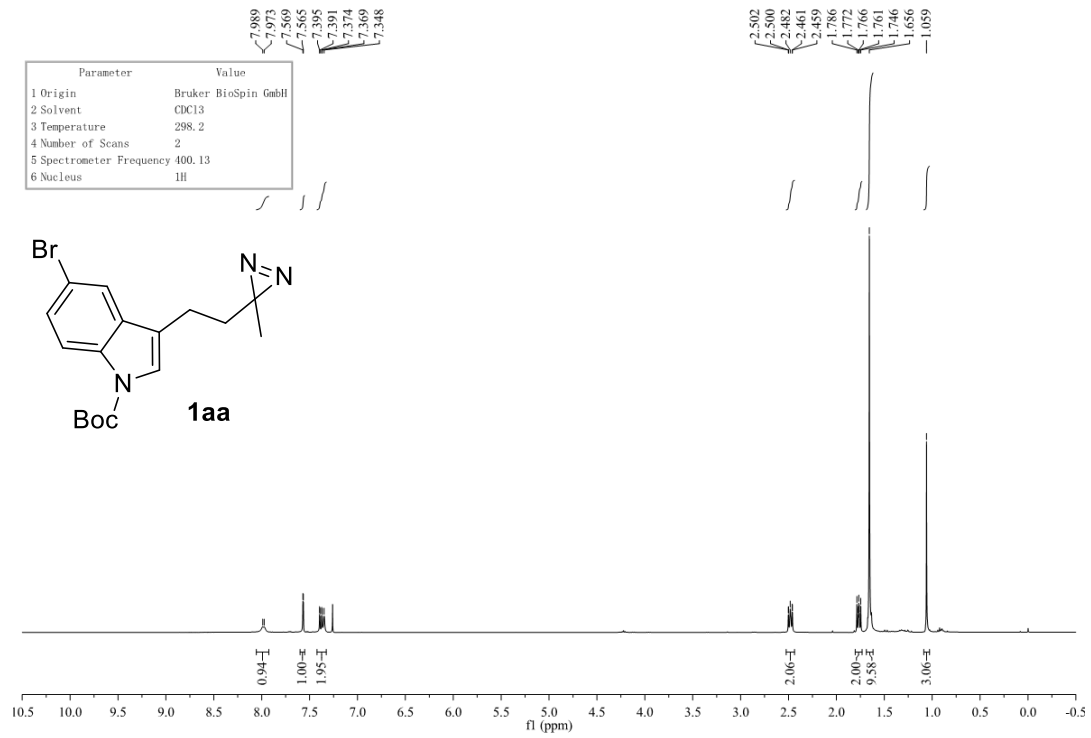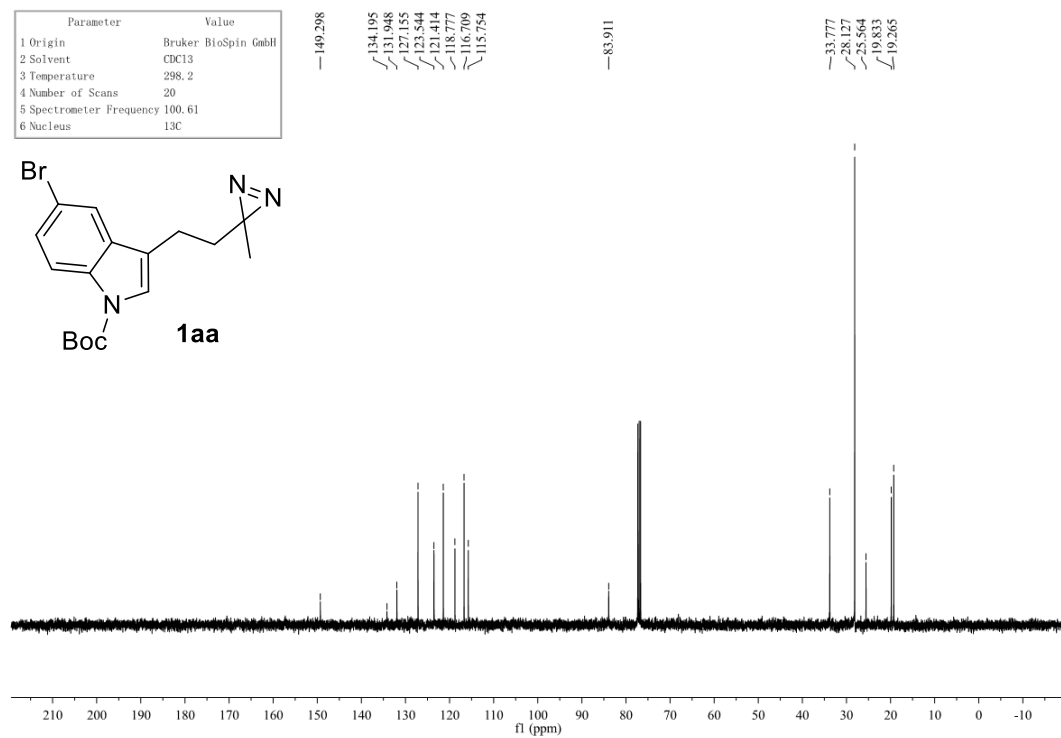

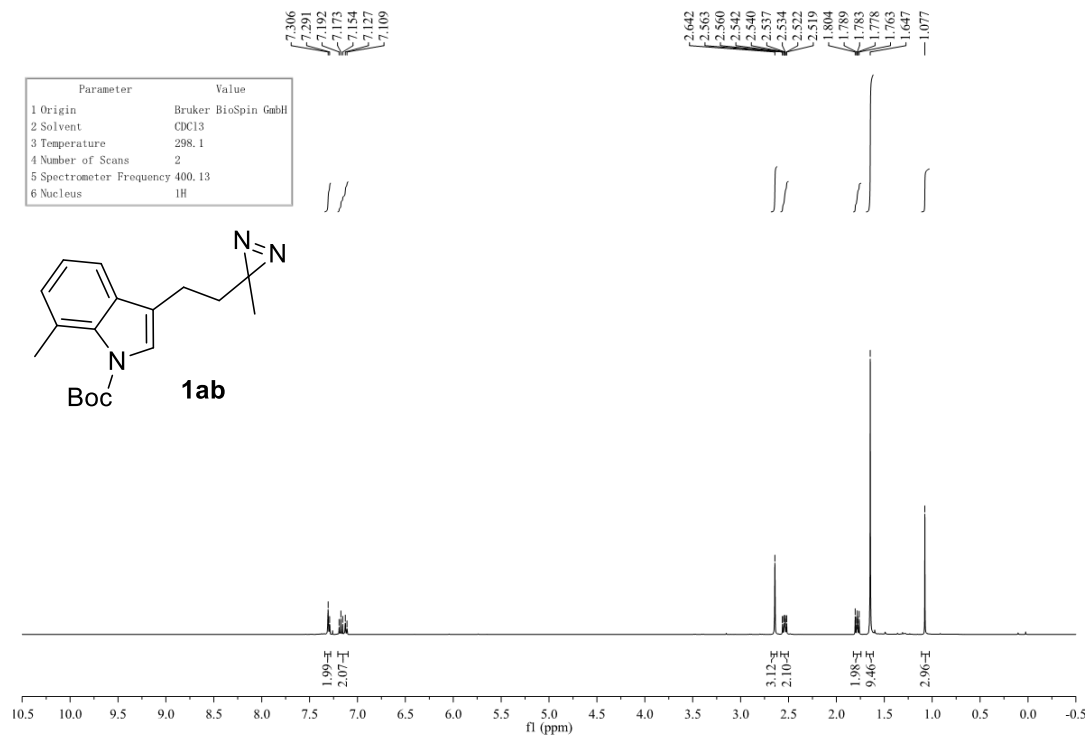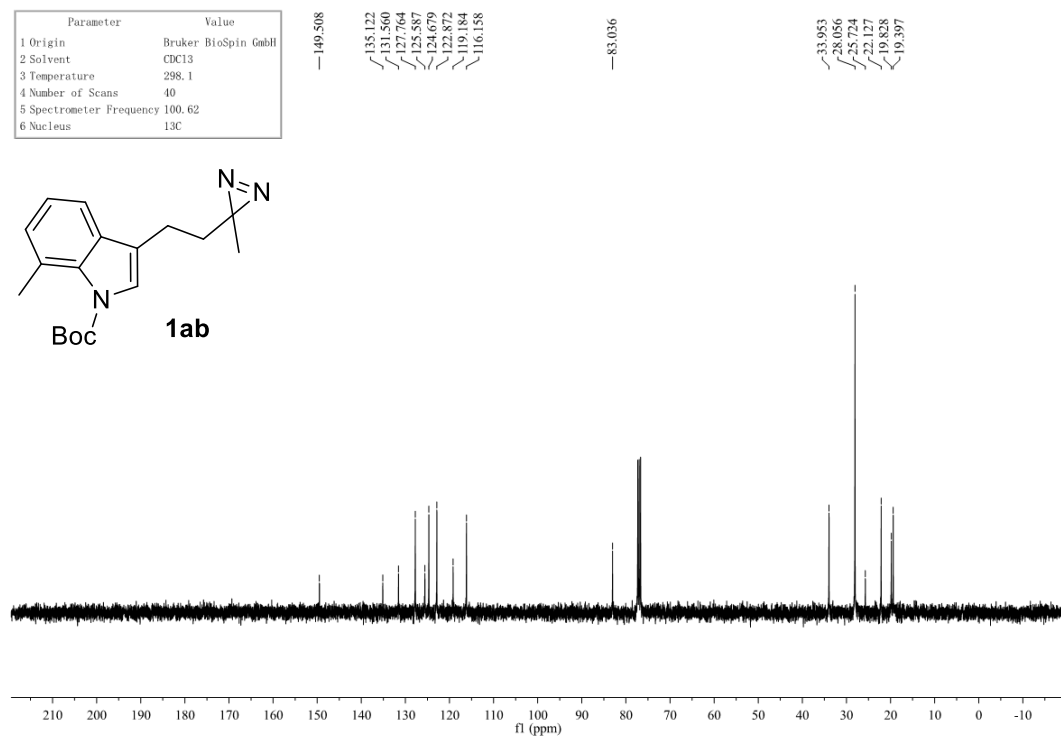

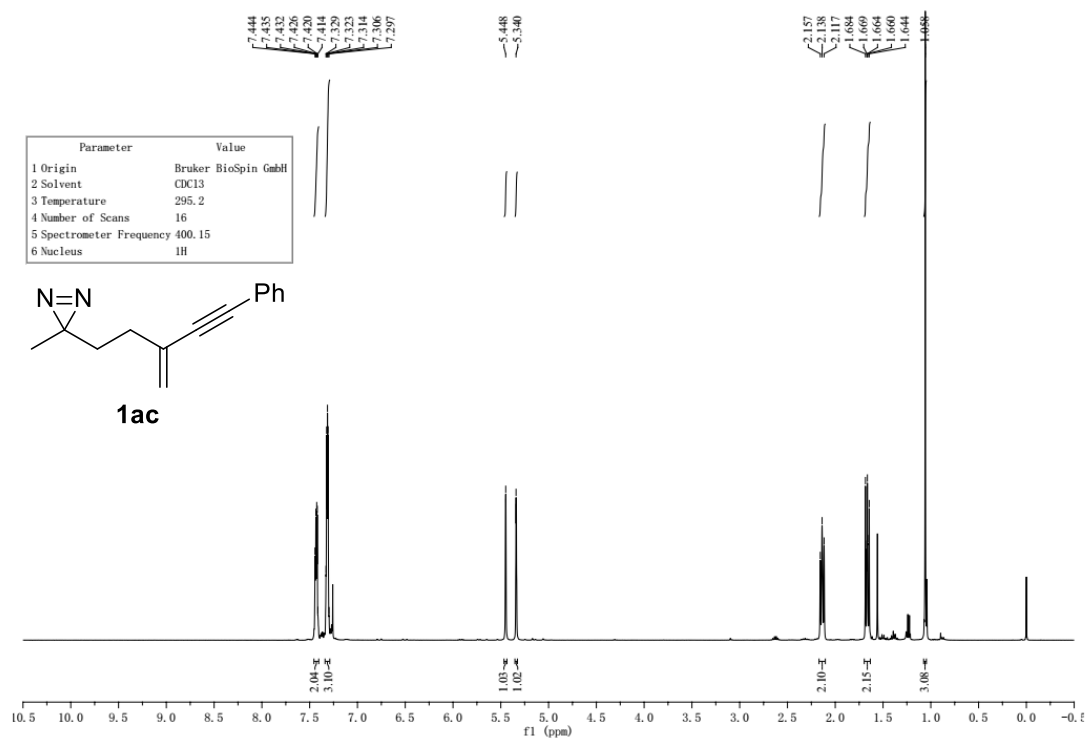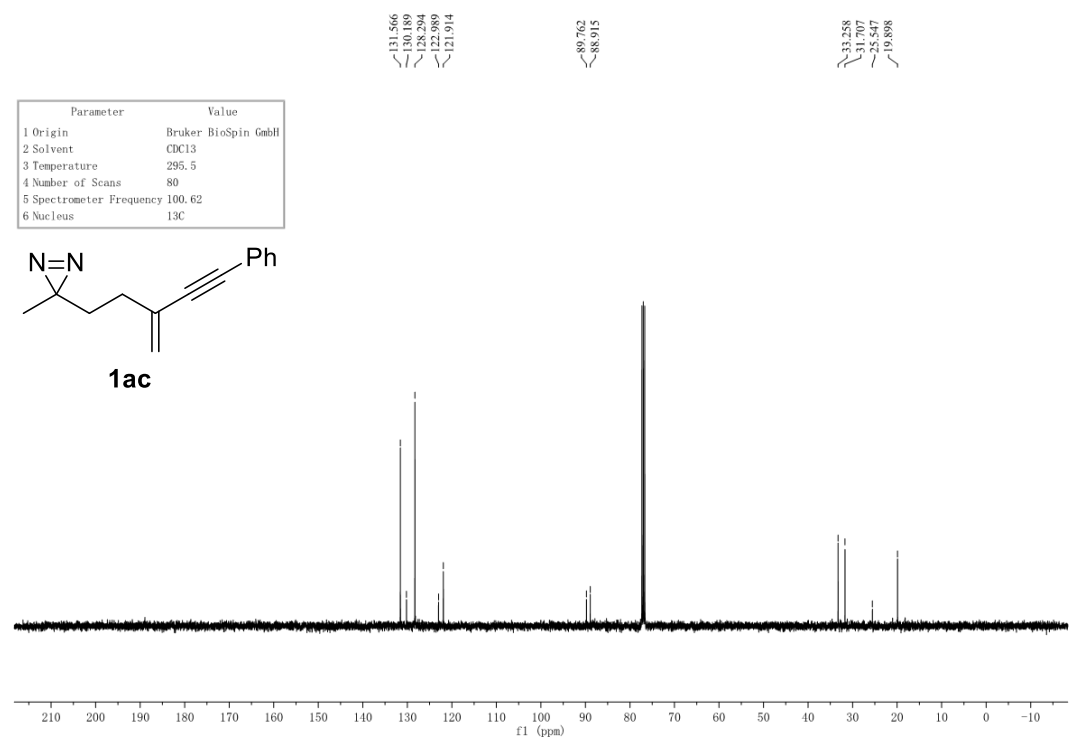

| Parameter                | Value               |
|--------------------------|---------------------|
| 1 Origin                 | Bruker BioSpin GmbH |
| 2 Solvent                | CDCl3               |
| 3 Temperature            | 298.2               |
| 4 Number of Scans        | 2                   |
| 5 Spectrometer Frequency | 400.13              |
| 6 Nucleus                | 1H                  |

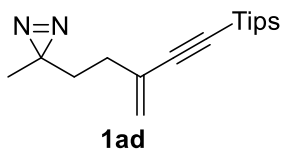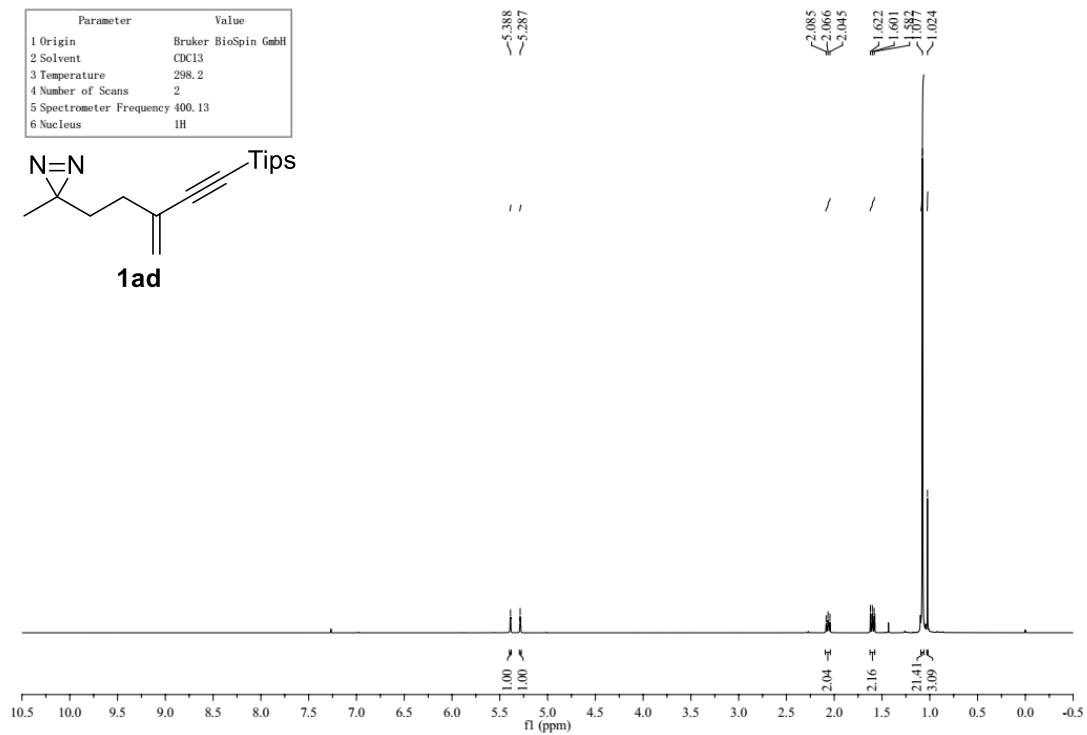

| Parameter                | Value               |
|--------------------------|---------------------|
| 1 Origin                 | Bruker BioSpin GmbH |
| 2 Solvent                | CDCl3               |
| 3 Temperature            | 298.1               |
| 4 Number of Scans        | 80                  |
| 5 Spectrometer Frequency | 100.62              |
| 6 Nucleus                | 13C                 |

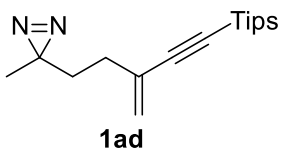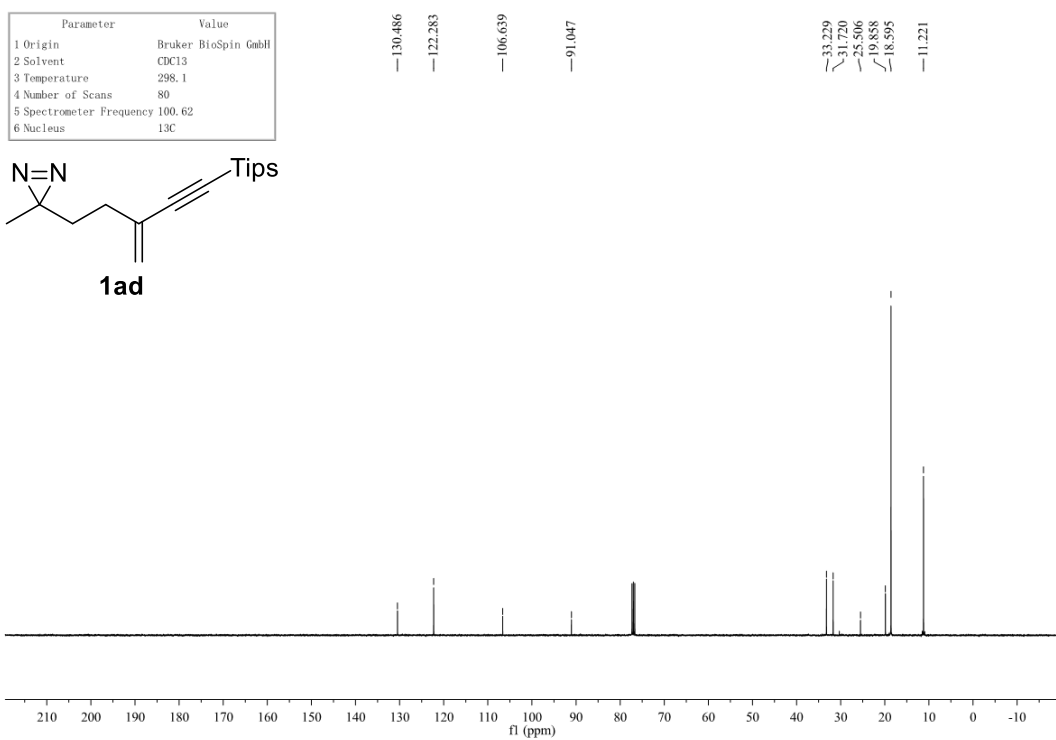

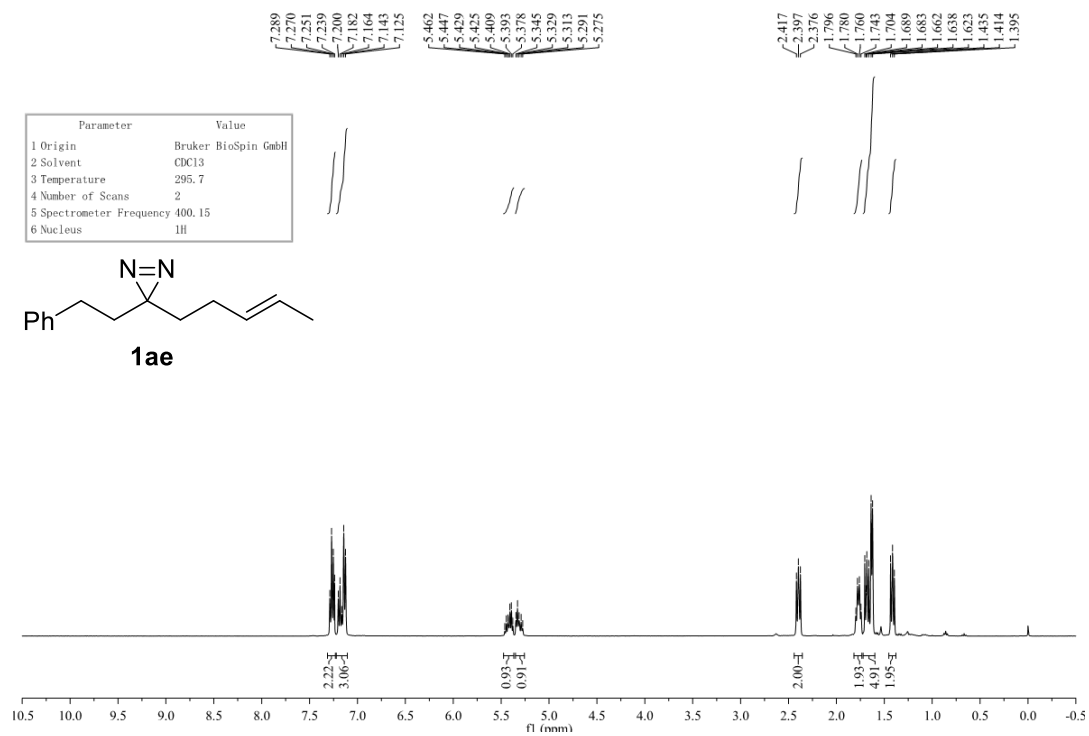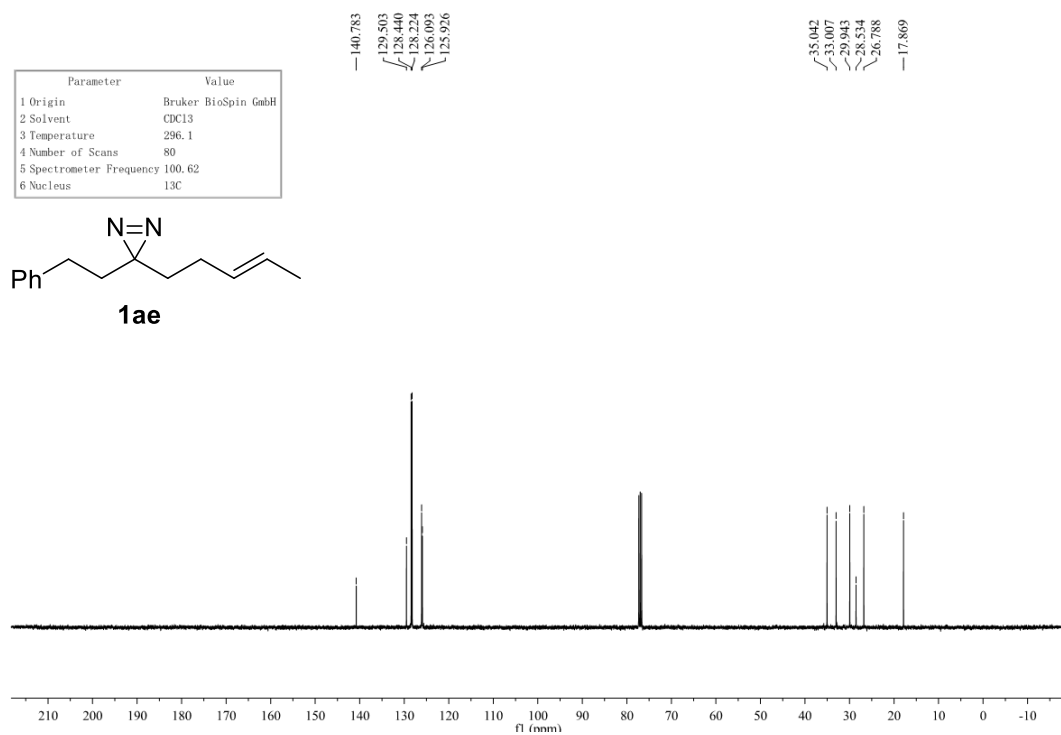

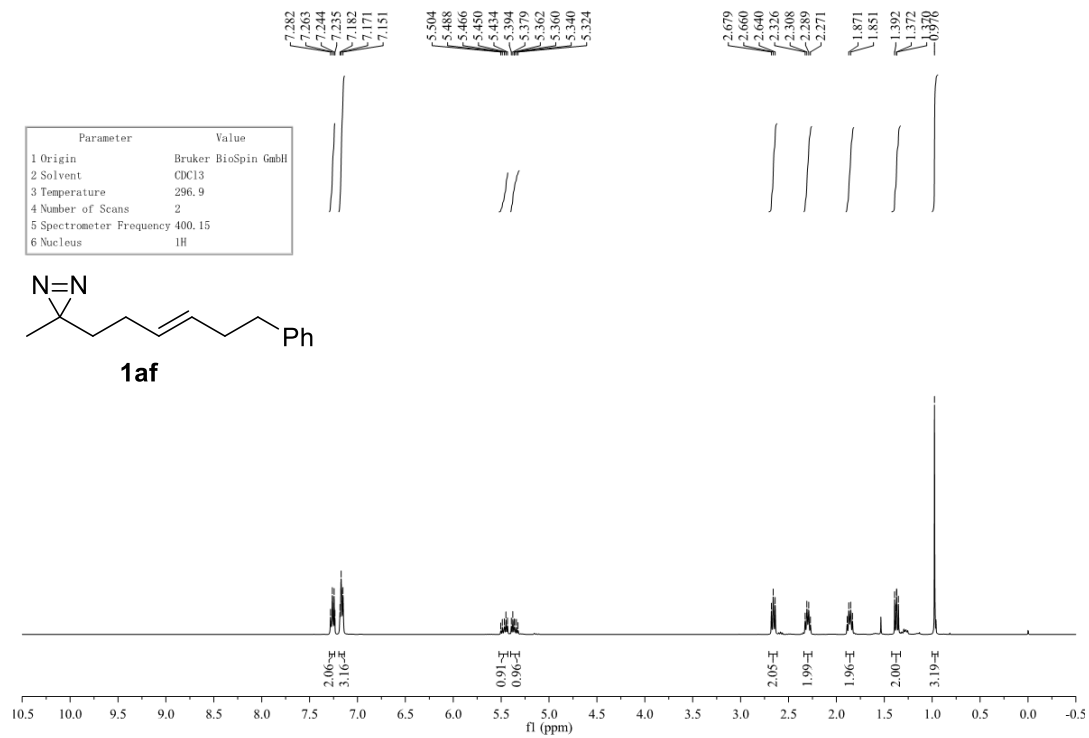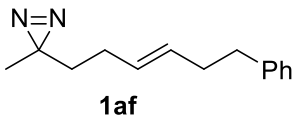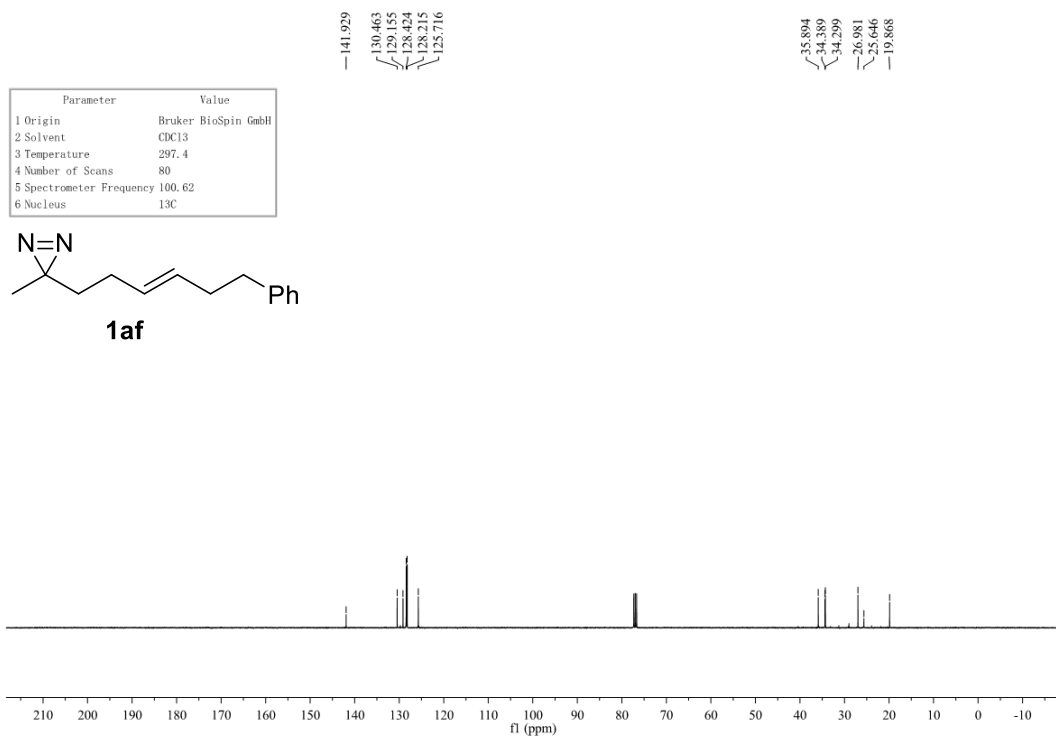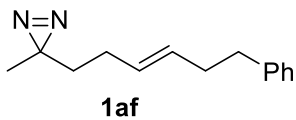

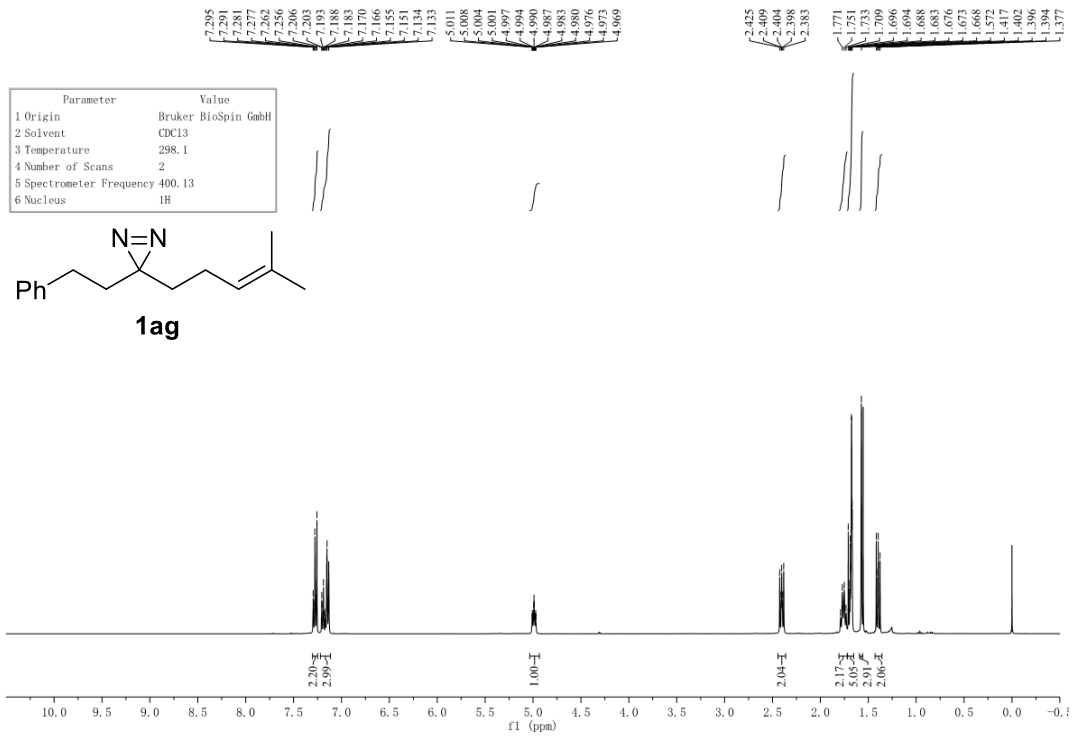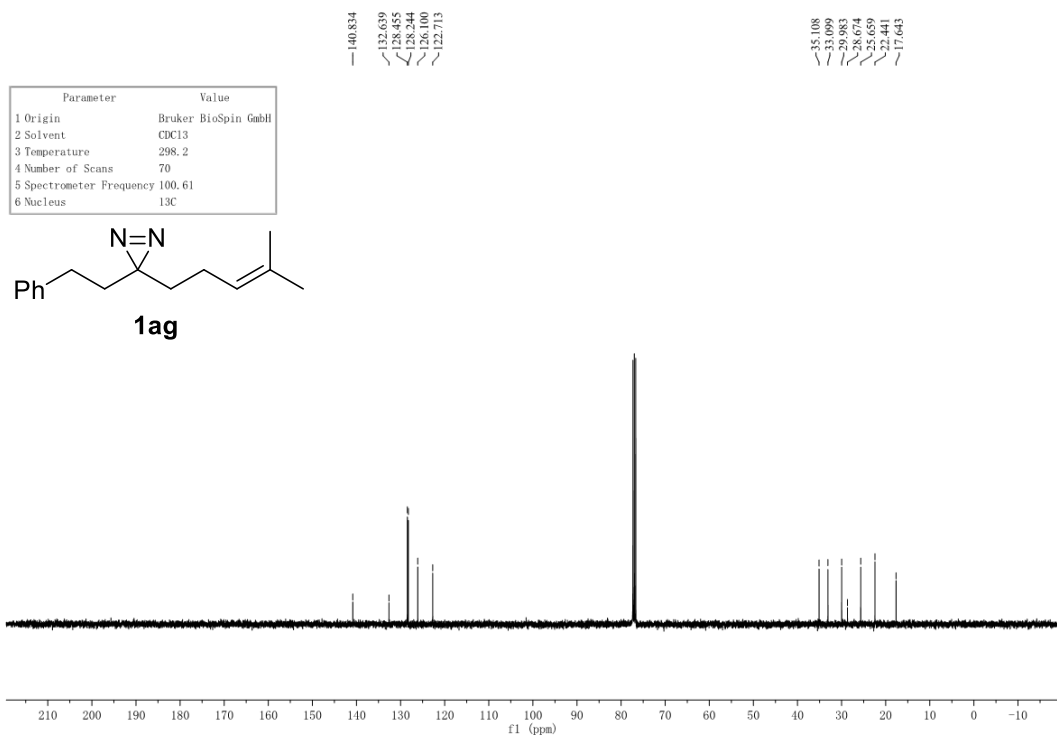



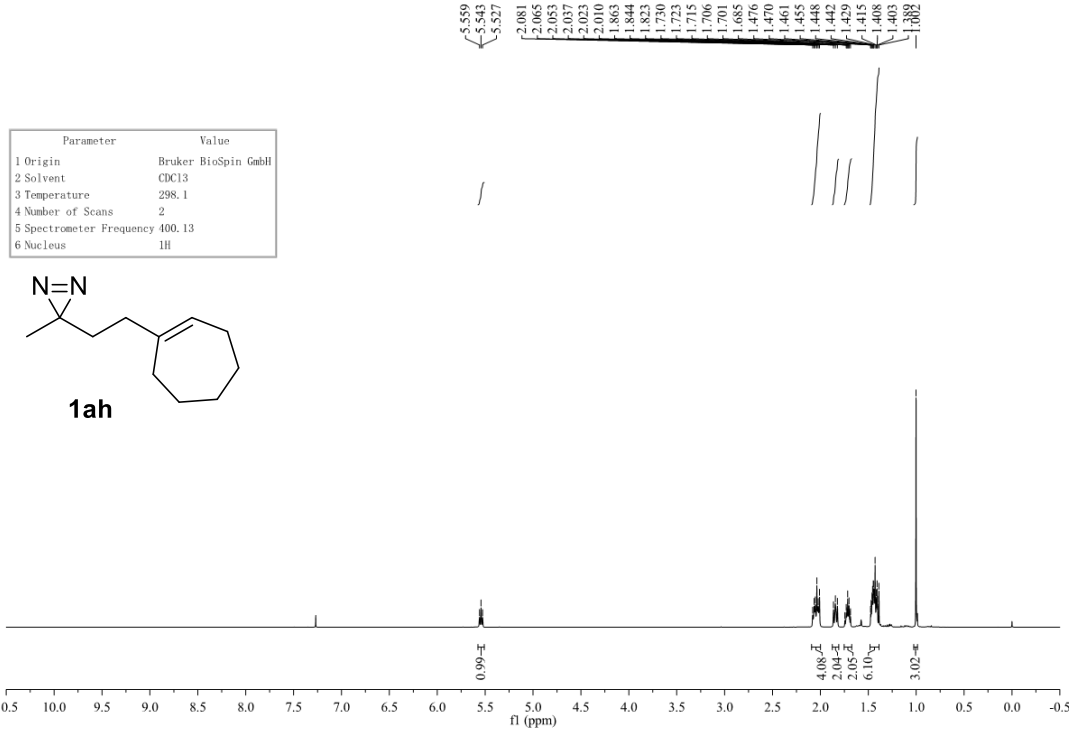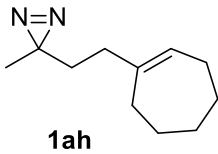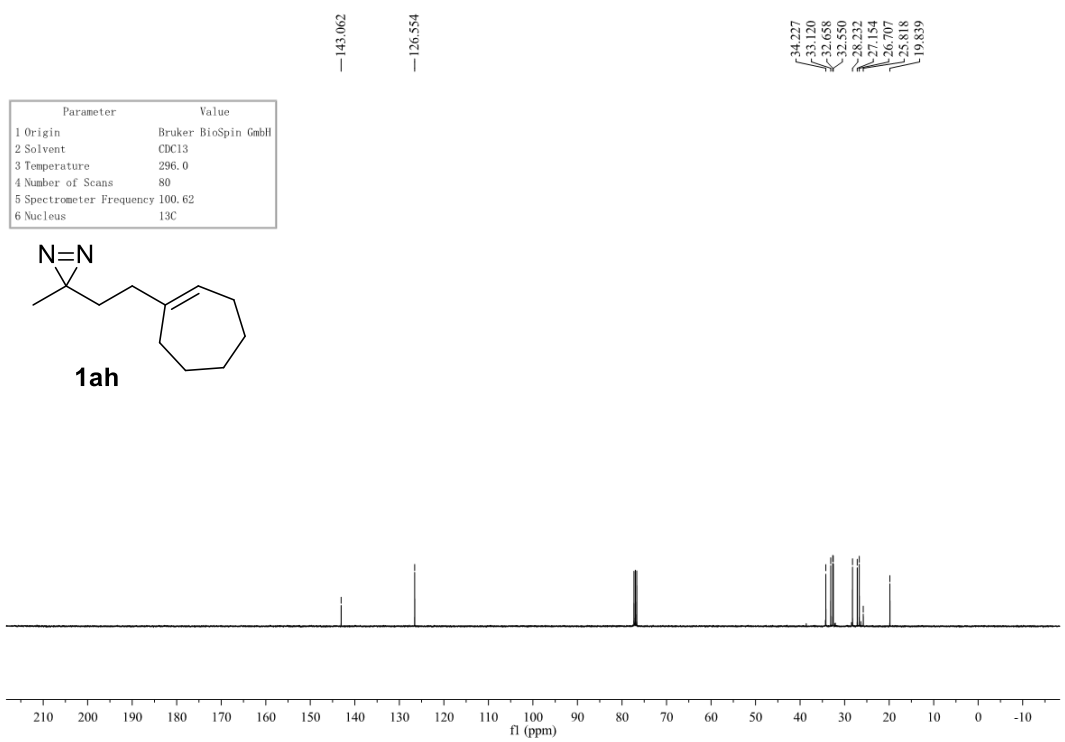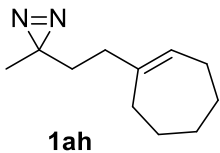

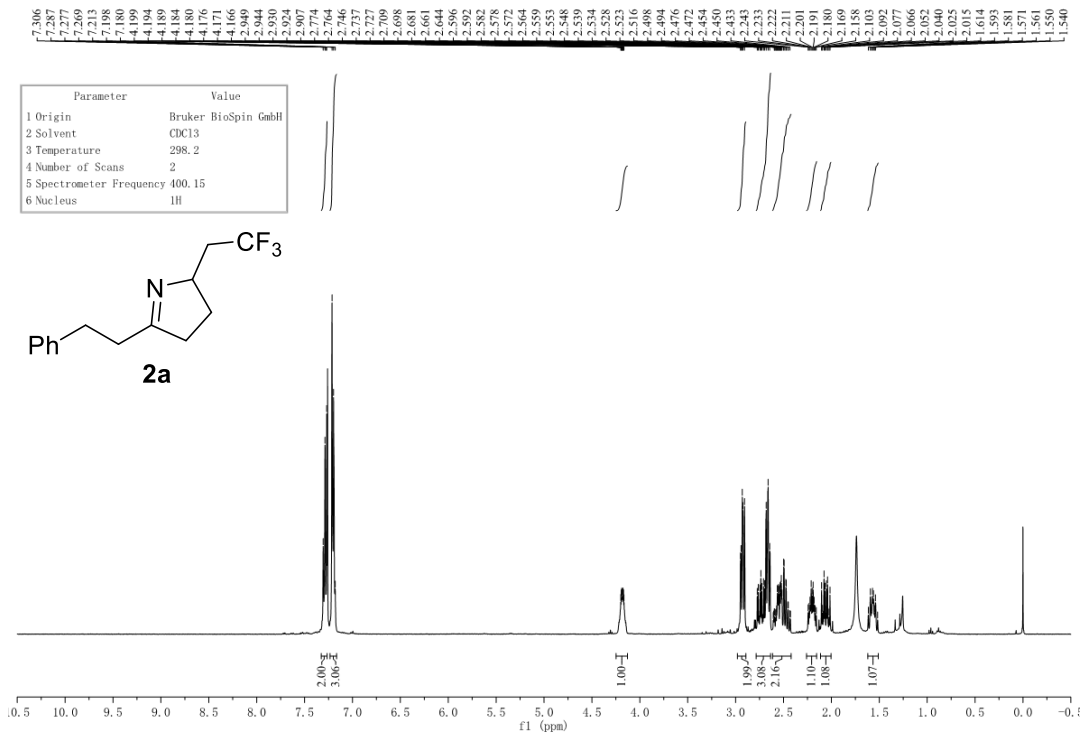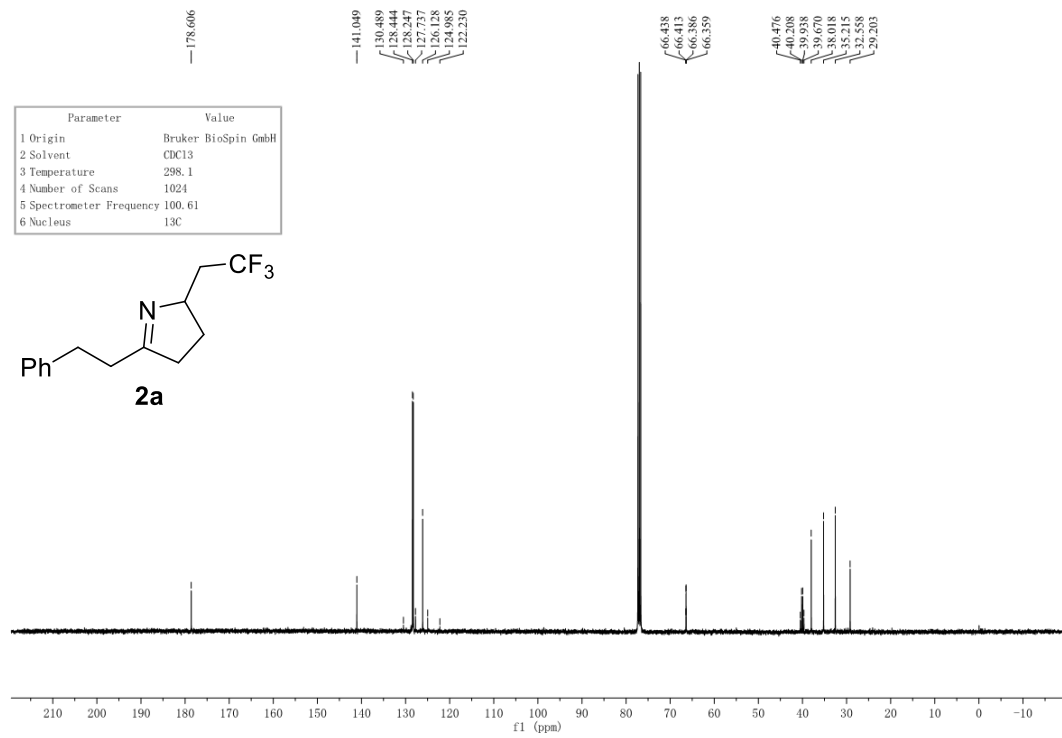

| Parameter                | Value               |
|--------------------------|---------------------|
| 1 Origin                 | Bruker BioSpin GmbH |
| 2 Solvent                | CDCl3               |
| 3 Temperature            | 298.2               |
| 4 Number of Scans        | 2                   |
| 5 Spectrometer Frequency | 376.52              |
| 6 Nucleus                | 19F                 |

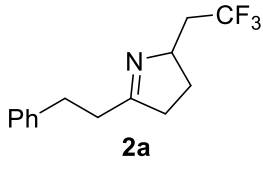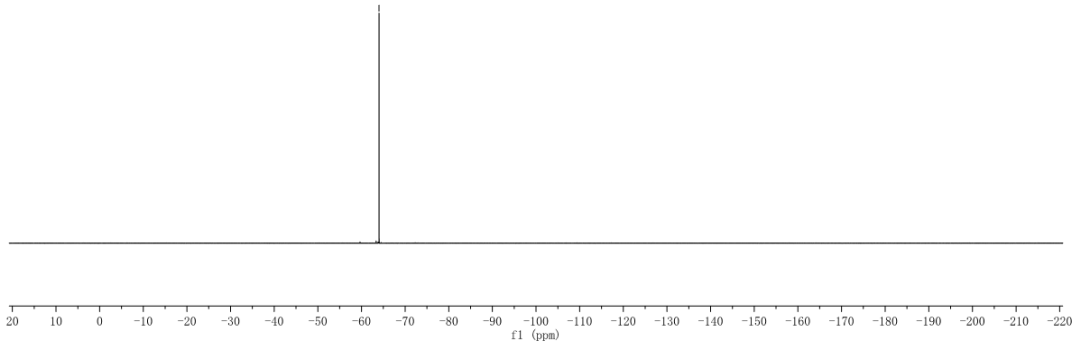

4.174  
4.169  
4.164  
4.159  
4.155  
4.150  
4.145  
4.141  
3.766  
2.779  
2.770  
2.760  
2.752  
2.742  
2.731  
2.723  
2.715  
2.622  
2.616  
2.612  
2.601  
2.597  
2.591  
2.583  
2.575  
2.573  
2.568  
2.558  
2.554  
2.548  
2.544  
2.528  
2.516  
2.505  
2.501  
2.483  
2.479  
2.462  
2.458  
2.440  
2.434  
2.427  
2.344  
2.326  
2.308  
2.305  
2.244  
2.234  
2.224  
2.212  
2.202  
2.192  
2.182  
2.170  
2.160  
2.114  
2.104  
2.088  
2.078  
2.063  
2.052  
2.036  
2.026  
1.914  
1.894  
1.573  
1.559  
1.539  
1.520  
1.293  
1.282  
1.186  
1.182  
0.872  
0.854

| Parameter                | Value               |
|--------------------------|---------------------|
| 1 Origin                 | Bruker BioSpin GmbH |
| 2 Solvent                | CDCl3               |
| 3 Temperature            | 296.2               |
| 4 Number of Scans        | 2                   |
| 5 Spectrometer Frequency | 400.15              |
| 6 Nucleus                | 1H                  |

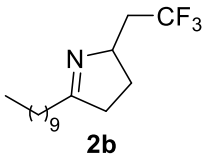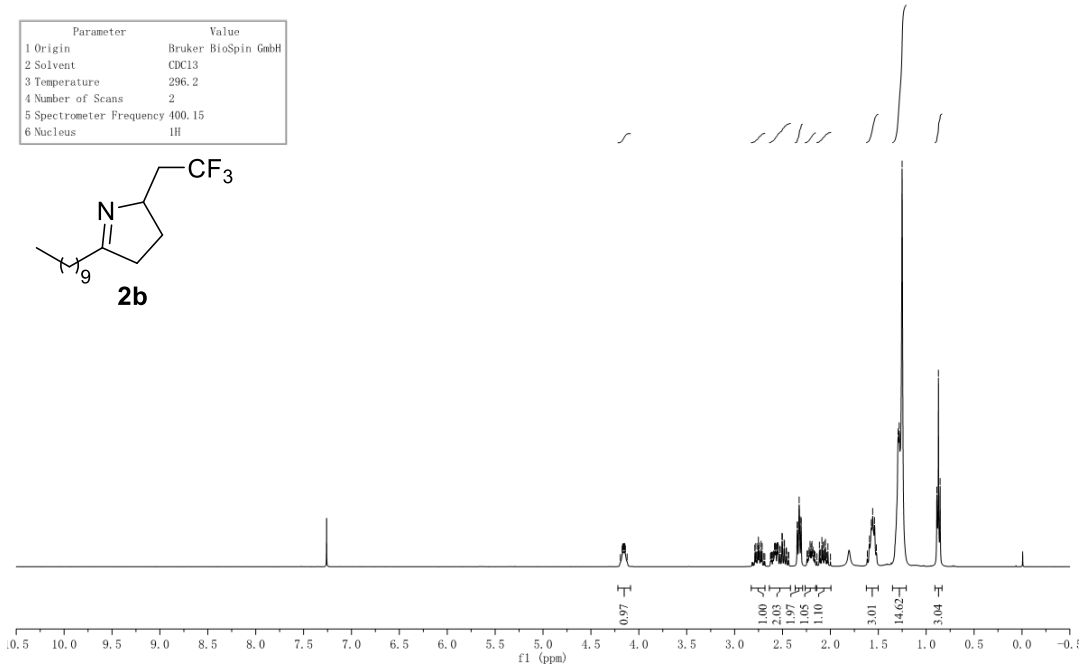

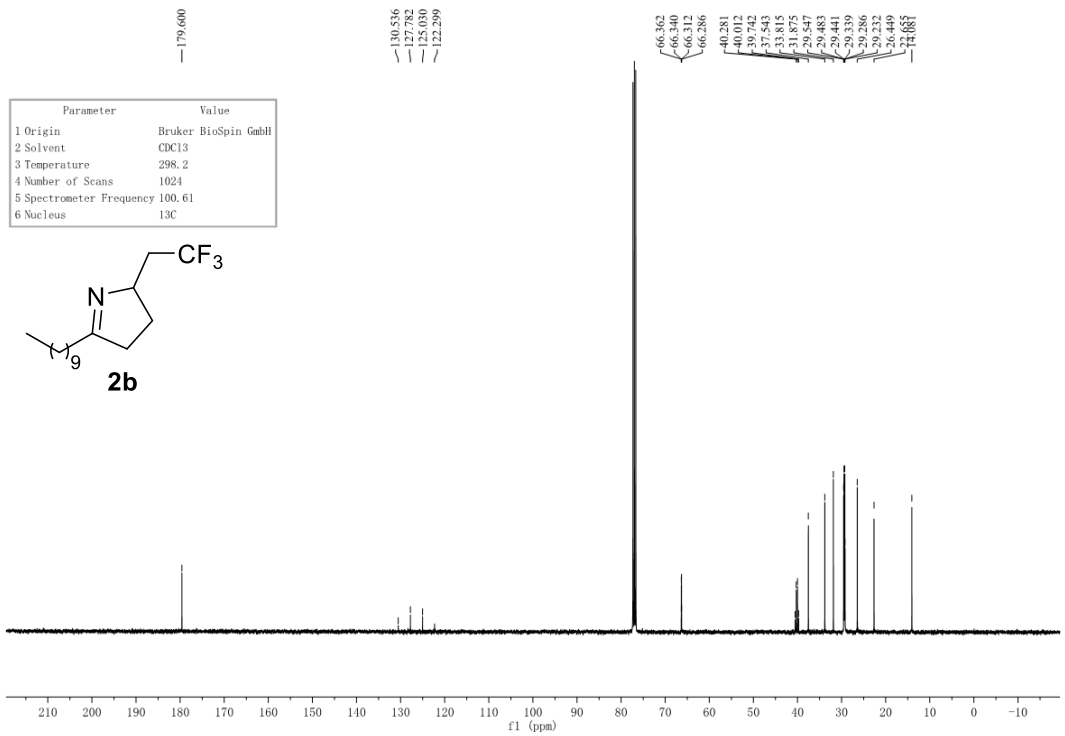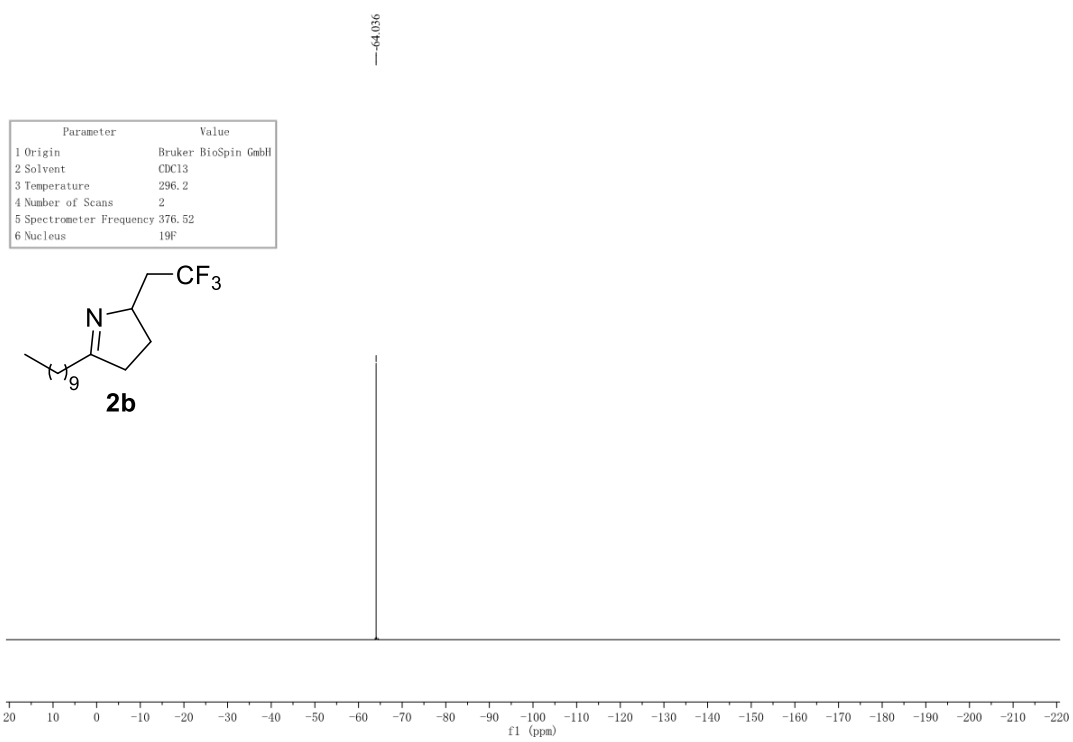

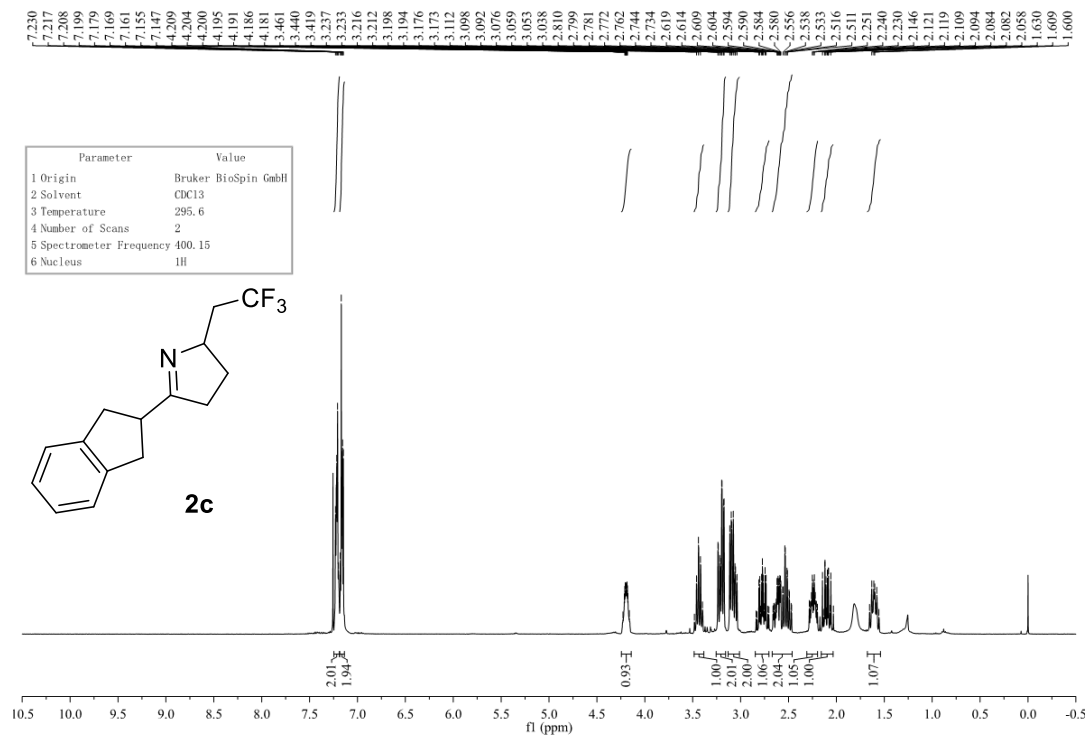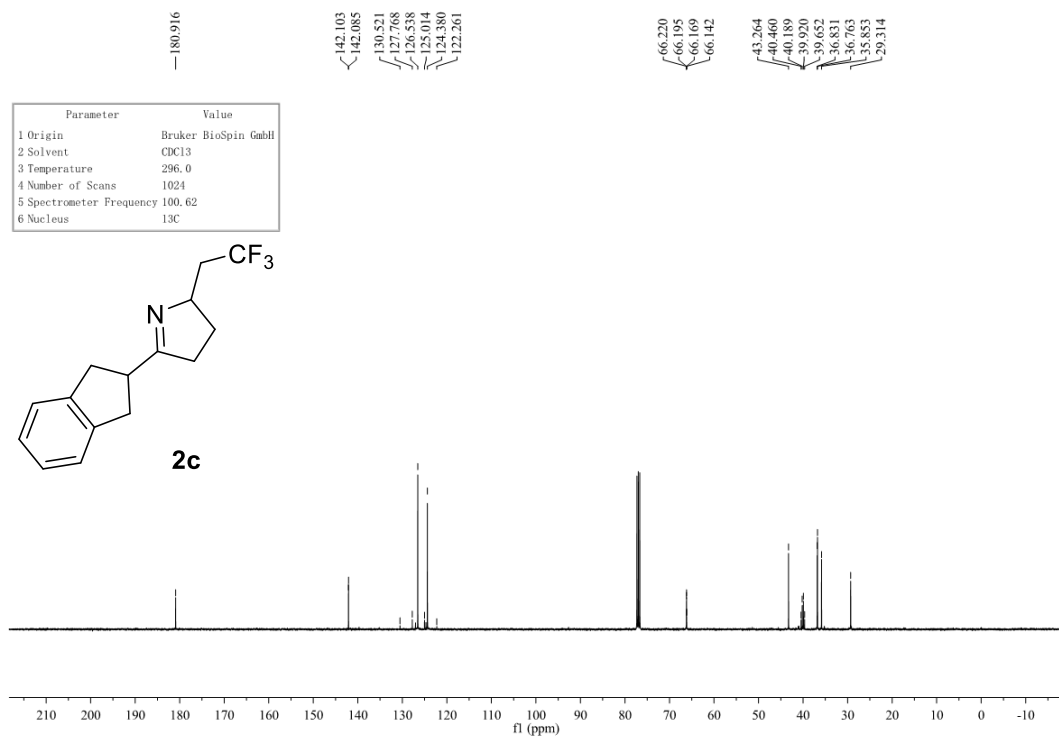

| Parameter                | Value               |
|--------------------------|---------------------|
| 1 Origin                 | Bruker BioSpin GmbH |
| 2 Solvent                | CDCl3               |
| 3 Temperature            | 295.7               |
| 4 Number of Scans        | 2                   |
| 5 Spectrometer Frequency | 376.52              |
| 6 Nucleus                | 19F                 |

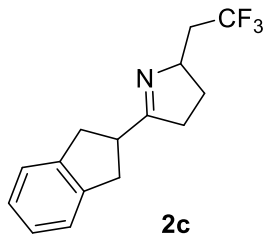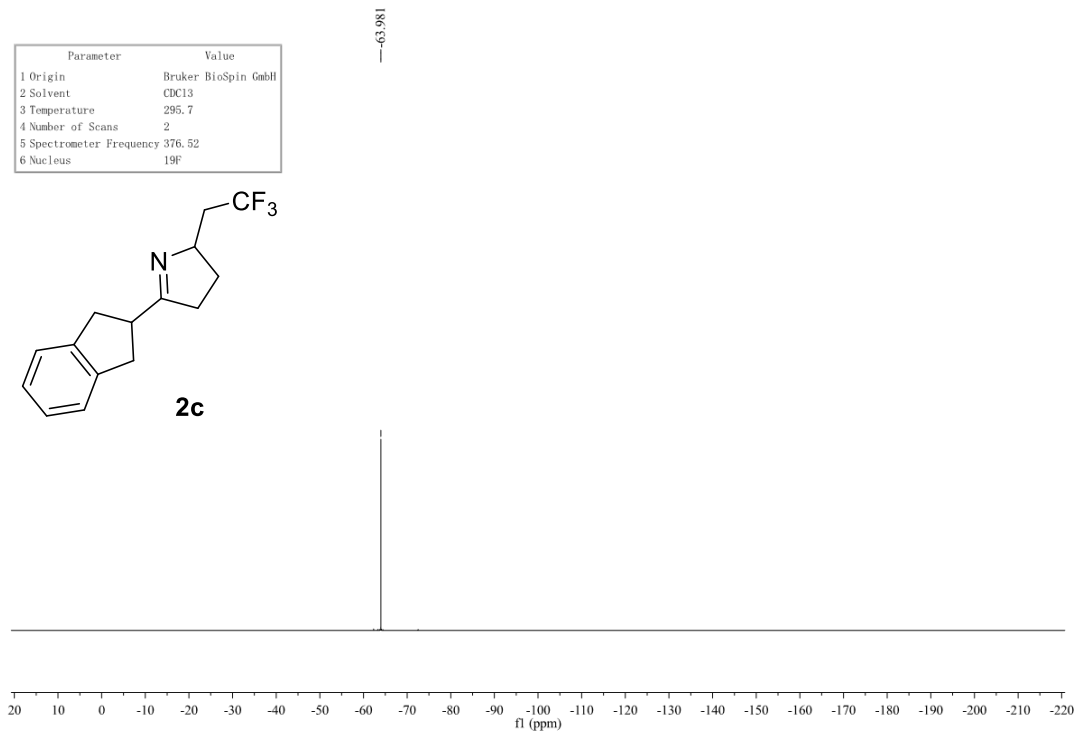

| Parameter                | Value               |
|--------------------------|---------------------|
| 1 Origin                 | Bruker BioSpin GmbH |
| 2 Solvent                | CDCl3               |
| 3 Temperature            | 298.2               |
| 4 Number of Scans        | 2                   |
| 5 Spectrometer Frequency | 400.15              |
| 6 Nucleus                | 1H                  |

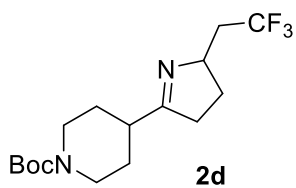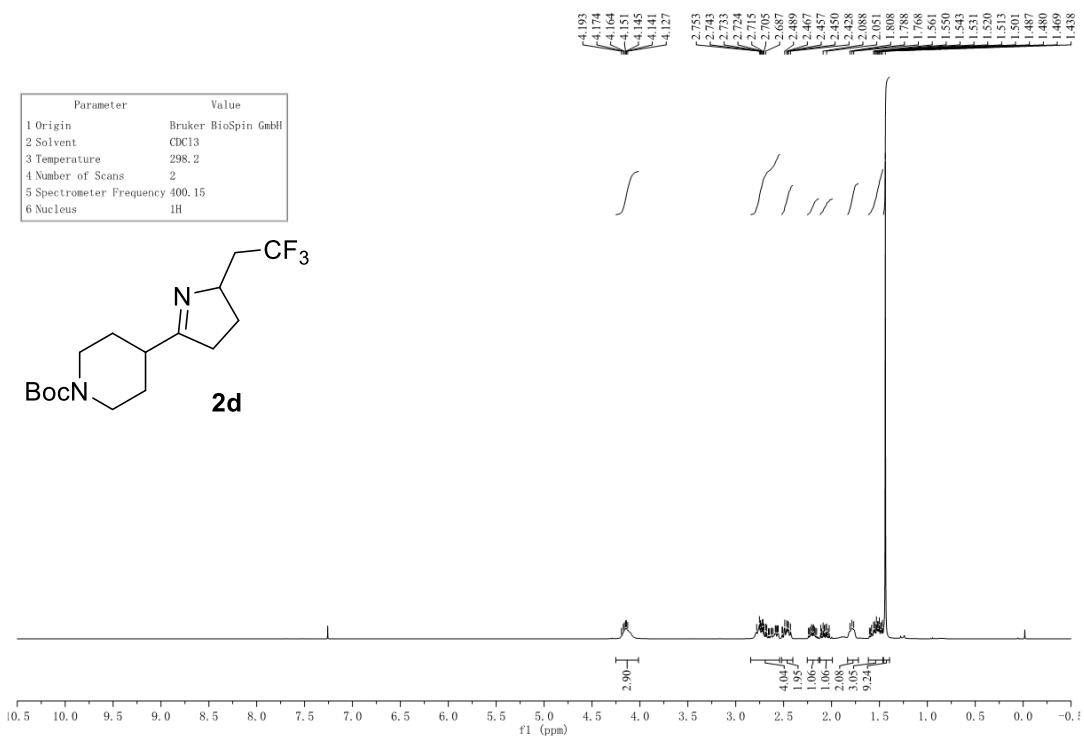

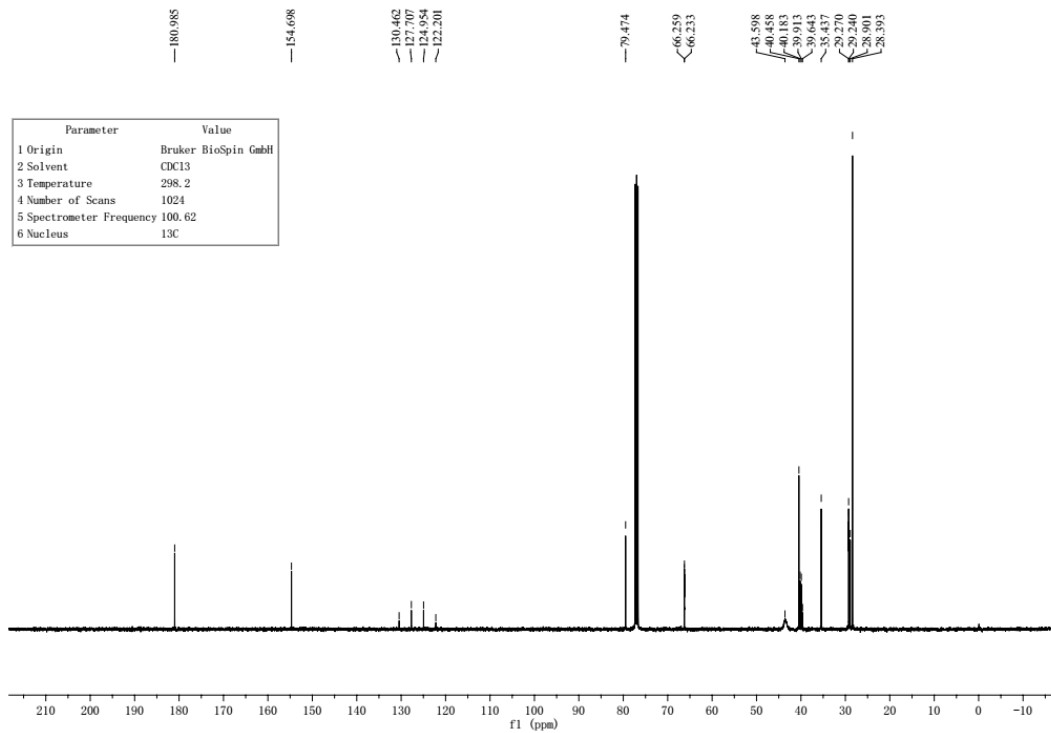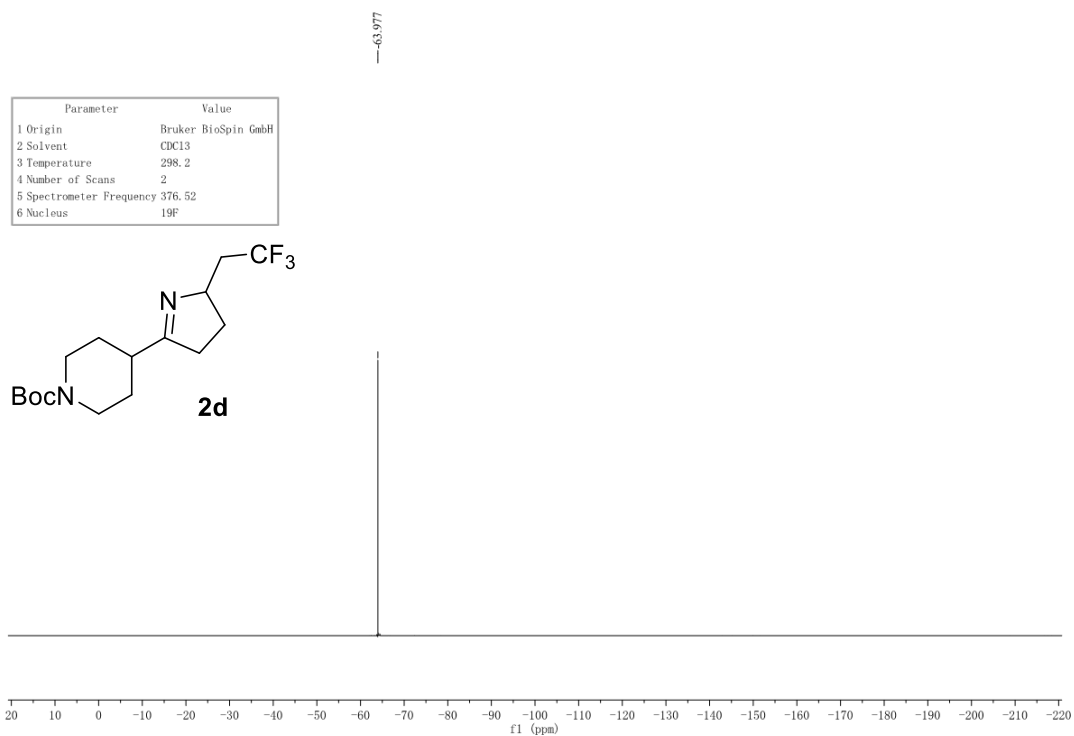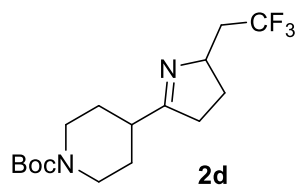

| Parameter                | Value               |
|--------------------------|---------------------|
| 1 Origin                 | Bruker BioSpin GmbH |
| 2 Solvent                | CDCl3               |
| 3 Temperature            | 297.5               |
| 4 Number of Scans        | 2                   |
| 5 Spectrometer Frequency | 400.15              |
| 6 Nucleus                | <sup>1</sup> H      |

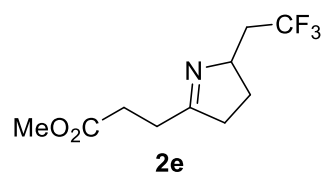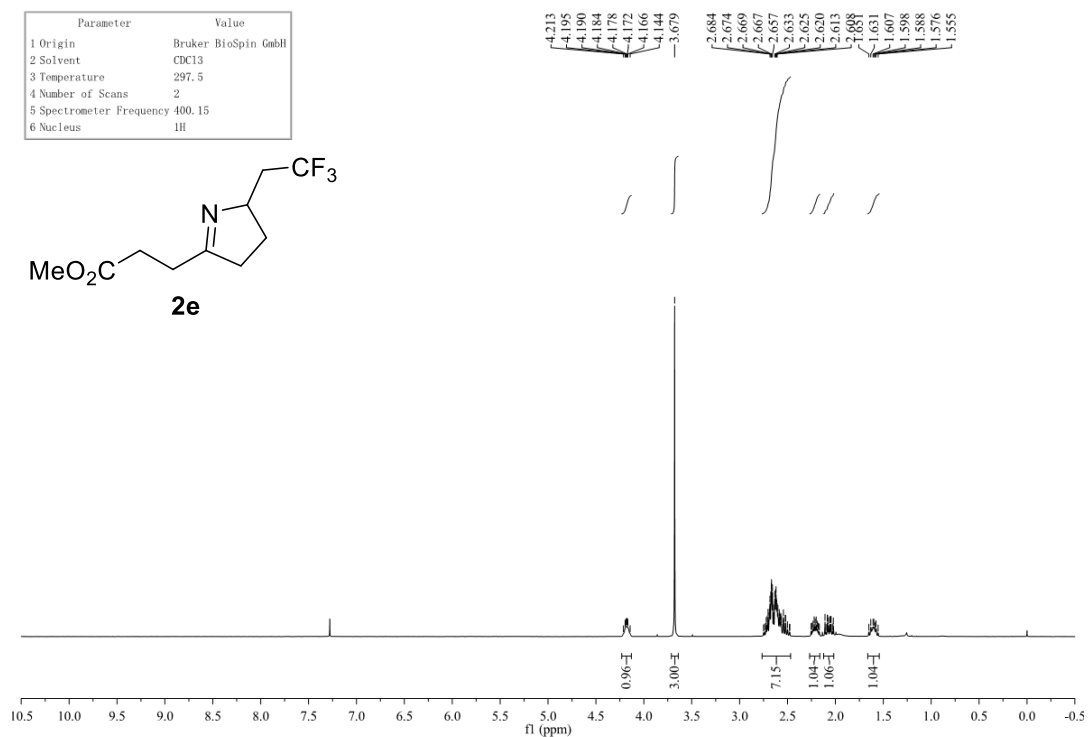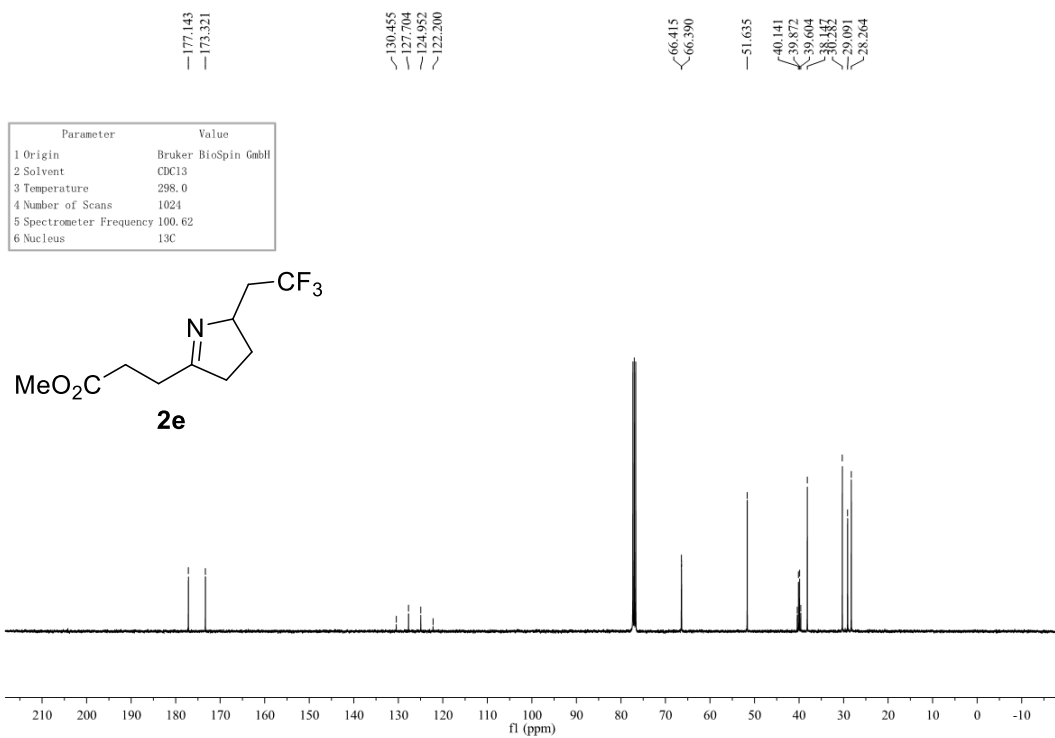

| Parameter                | Value               |
|--------------------------|---------------------|
| 1 Origin                 | Bruker BioSpin GmbH |
| 2 Solvent                | CDCl3               |
| 3 Temperature            | 298.0               |
| 4 Number of Scans        | 1024                |
| 5 Spectrometer Frequency | 100.62              |
| 6 Nucleus                | <sup>13</sup> C     |

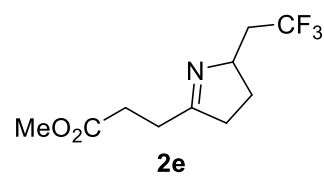



| Parameter                | Value               |
|--------------------------|---------------------|
| 1 Origin                 | Bruker BioSpin GmbH |
| 2 Solvent                | CDCl3               |
| 3 Temperature            | 297.5               |
| 4 Number of Scans        | 2                   |
| 5 Spectrometer Frequency | 376.52              |
| 6 Nucleus                | 19F                 |

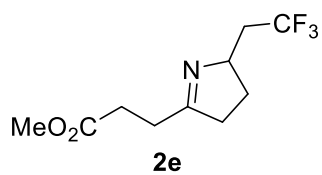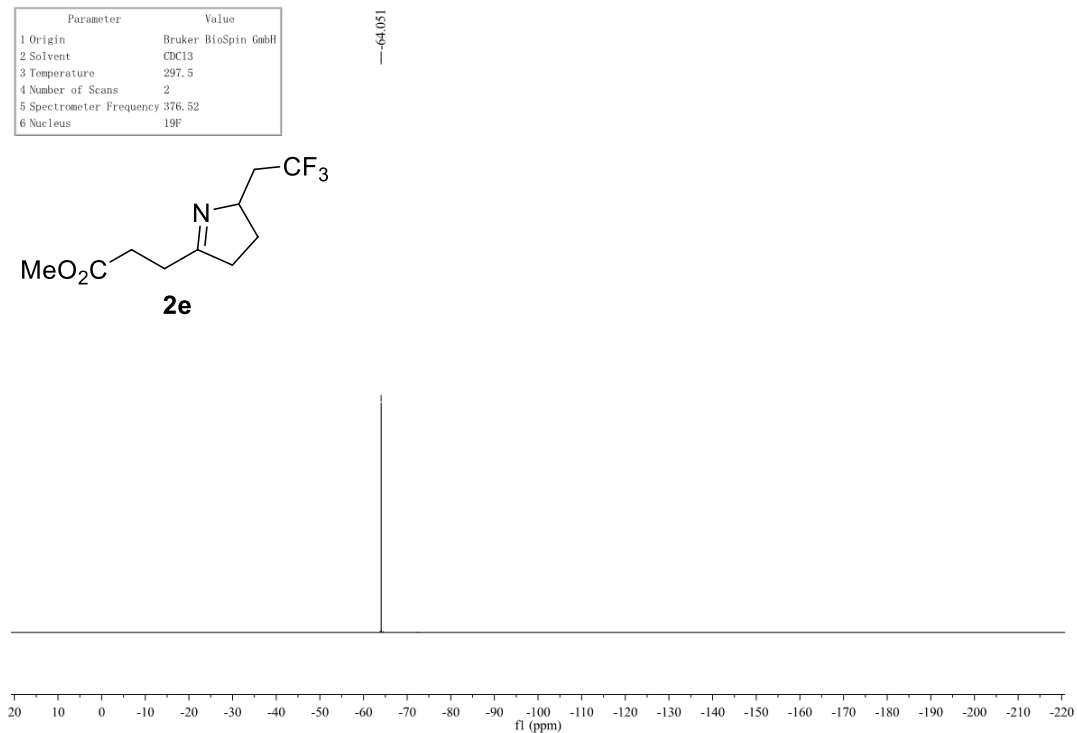

7.282  
7.262  
7.250  
7.244  
7.228  
7.209  
7.204  
7.187  
7.166  
7.149  
6.966  
6.945  
4.211  
4.206  
4.200  
4.186  
4.189  
4.183  
4.177  
2.961  
2.937  
2.919  
2.906  
2.891  
2.890  
2.864  
2.774  
2.762  
2.745  
2.734  
2.724  
2.717  
2.706  
2.694  
2.689  
2.677  
2.669  
2.651  
2.640  
2.633  
2.628  
2.622  
2.618  
2.608  
2.603  
2.592  
2.567  
2.546  
2.524  
2.502  
2.266  
2.255  
2.245  
2.234  
2.223  
2.213  
2.203  
2.191  
2.181  
2.123  
2.113  
2.098  
2.086  
2.071  
2.061  
2.046  
2.036  
1.669  
1.641  
1.632  
1.600  
1.578  
1.556

| Parameter                | Value               |
|--------------------------|---------------------|
| 1 Origin                 | Bruker BioSpin GmbH |
| 2 Solvent                | CDCl3               |
| 3 Temperature            | 298.1               |
| 4 Number of Scans        | 2                   |
| 5 Spectrometer Frequency | 400.15              |
| 6 Nucleus                | 1H                  |

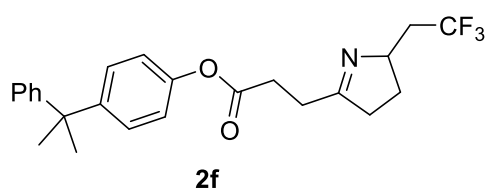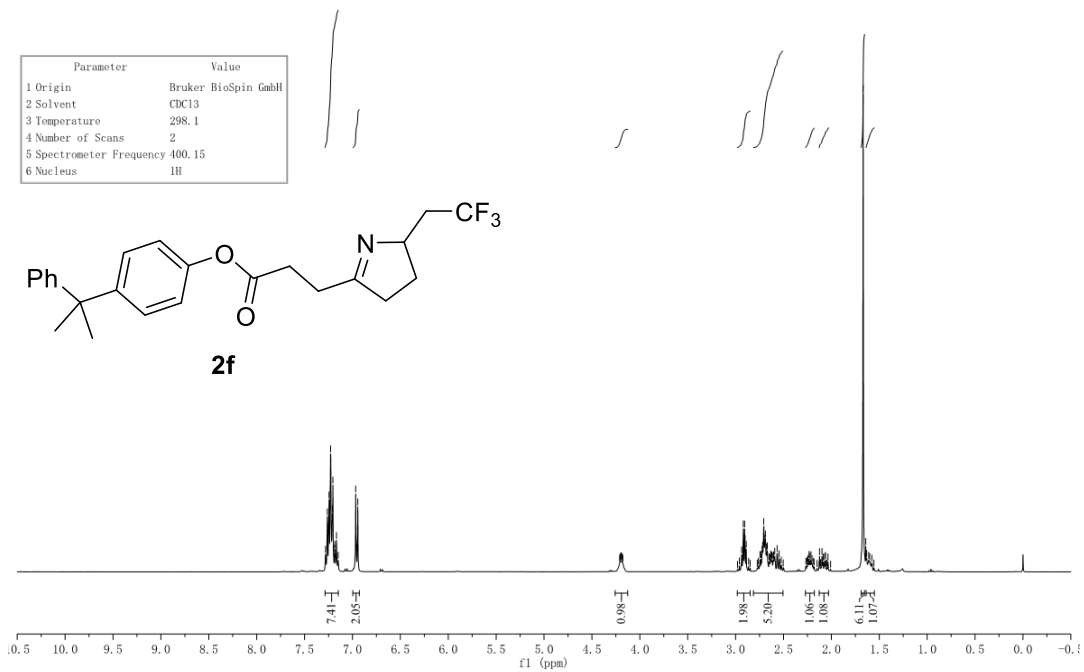

176.980  
 171.597  
 150.293  
 148.475  
 148.160  
 130.469  
 128.006  
 127.735  
 127.715  
 126.719  
 125.686  
 124.963  
 122.209  
 120.741  
 66.483  
 66.458  
 66.432  
 66.405  
 42.671  
 40.481  
 39.442  
 39.042  
 39.673  
 38.308  
 30.787  
 30.668  
 29.219  
 28.192

| Parameter                | Value               |
|--------------------------|---------------------|
| 1 Origin                 | Bruker BioSpin GmbH |
| 2 Solvent                | CDCl3               |
| 3 Temperature            | 298.2               |
| 4 Number of Scans        | 1024                |
| 5 Spectrometer Frequency | 100.61              |
| 6 Nucleus                | 13C                 |

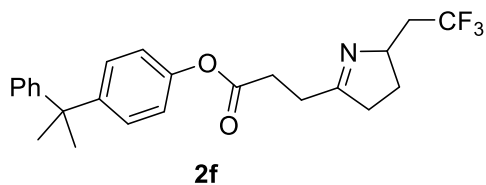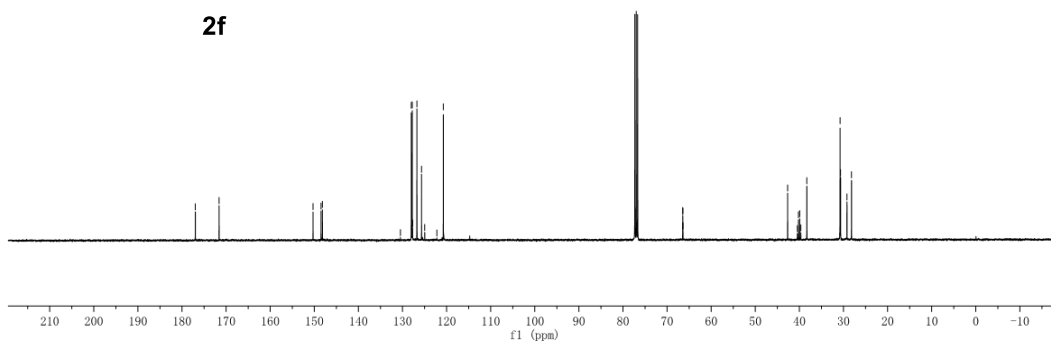

-63.978

| Parameter                | Value               |
|--------------------------|---------------------|
| 1 Origin                 | Bruker BioSpin GmbH |
| 2 Solvent                | CDCl3               |
| 3 Temperature            | 298.2               |
| 4 Number of Scans        | 2                   |
| 5 Spectrometer Frequency | 376.52              |
| 6 Nucleus                | 19F                 |

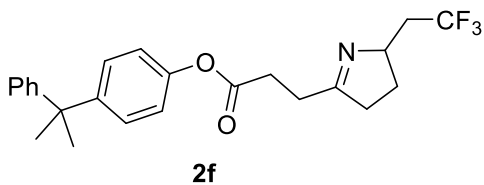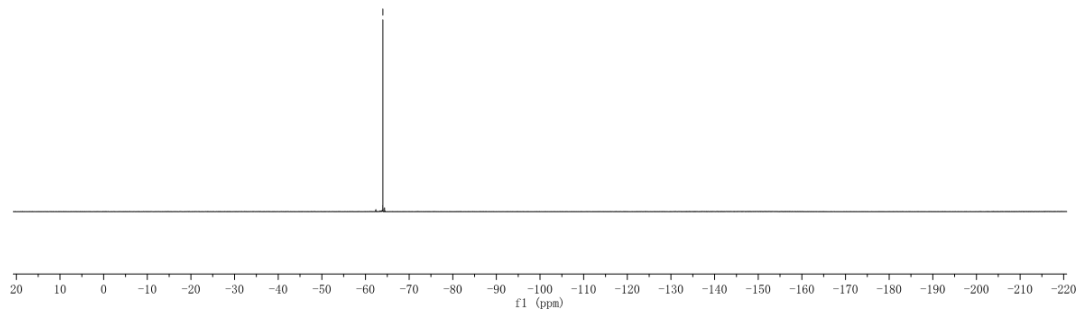

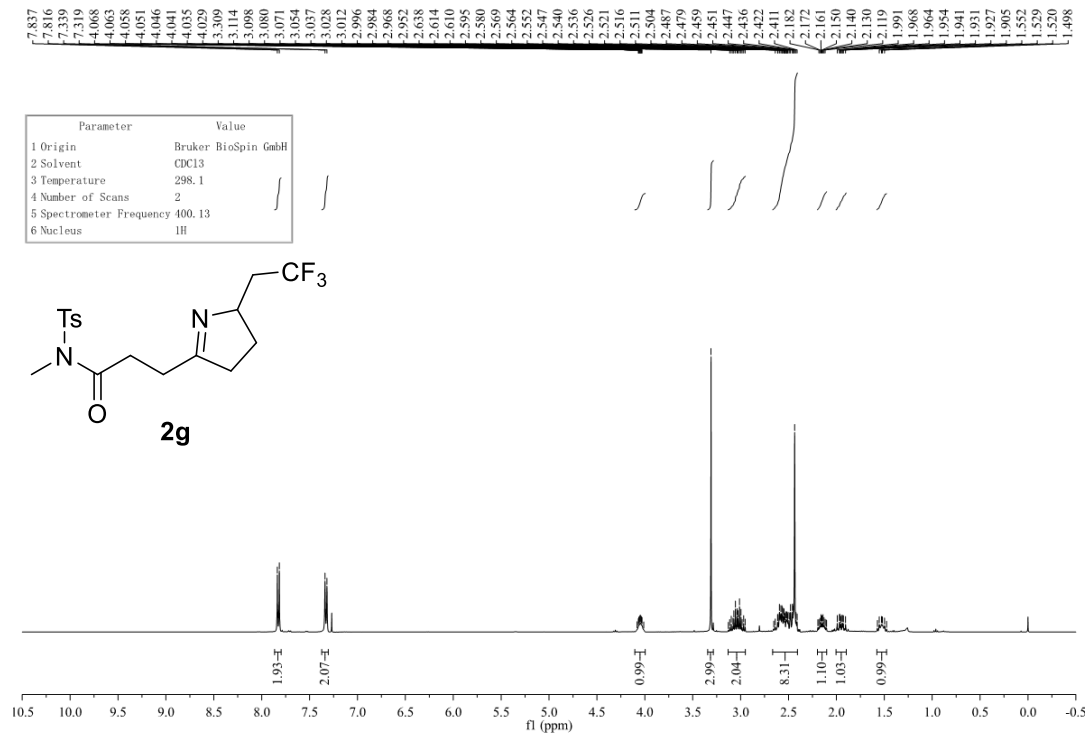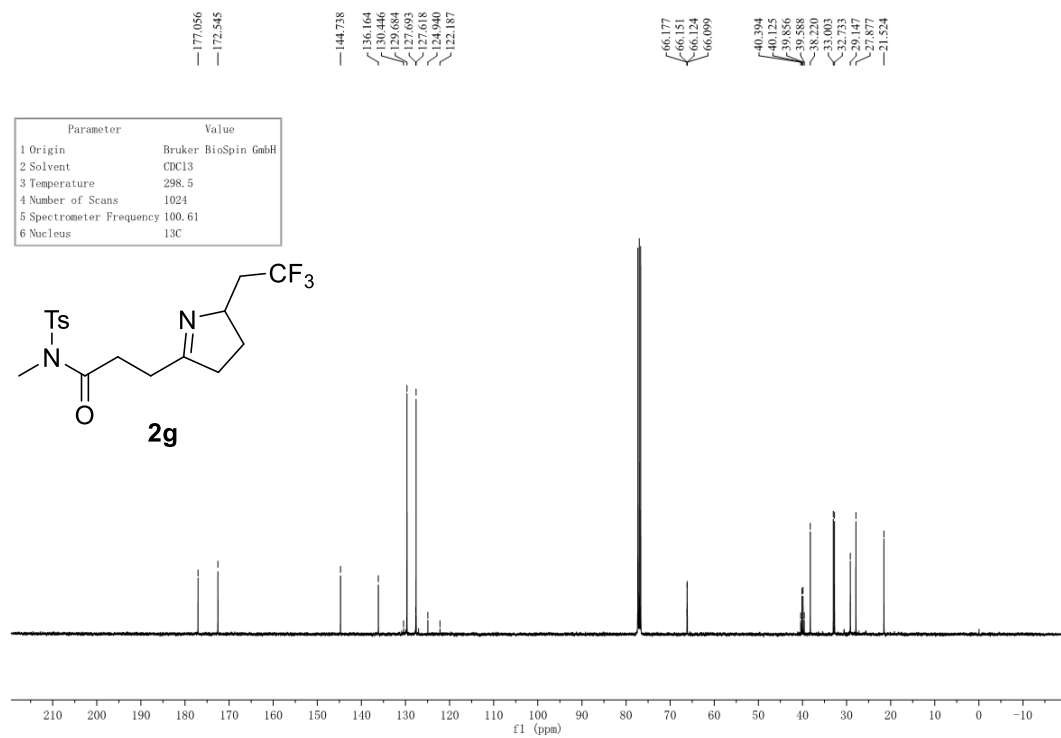

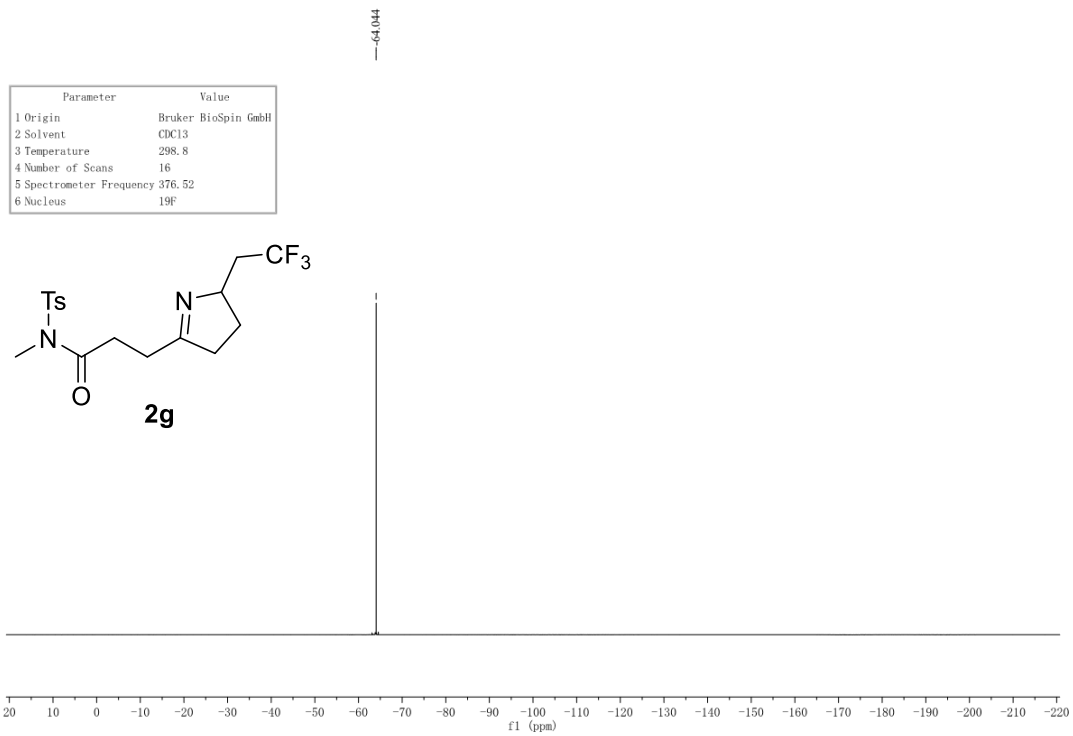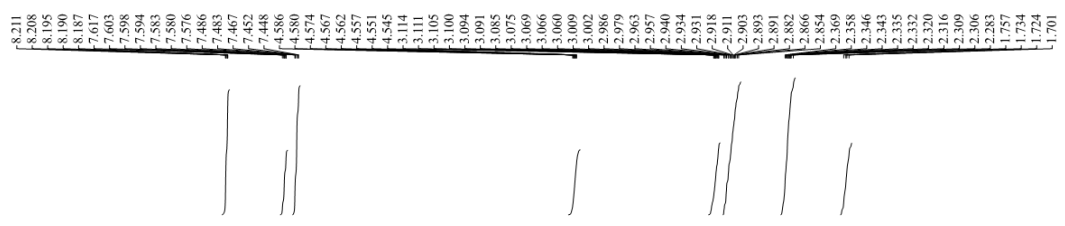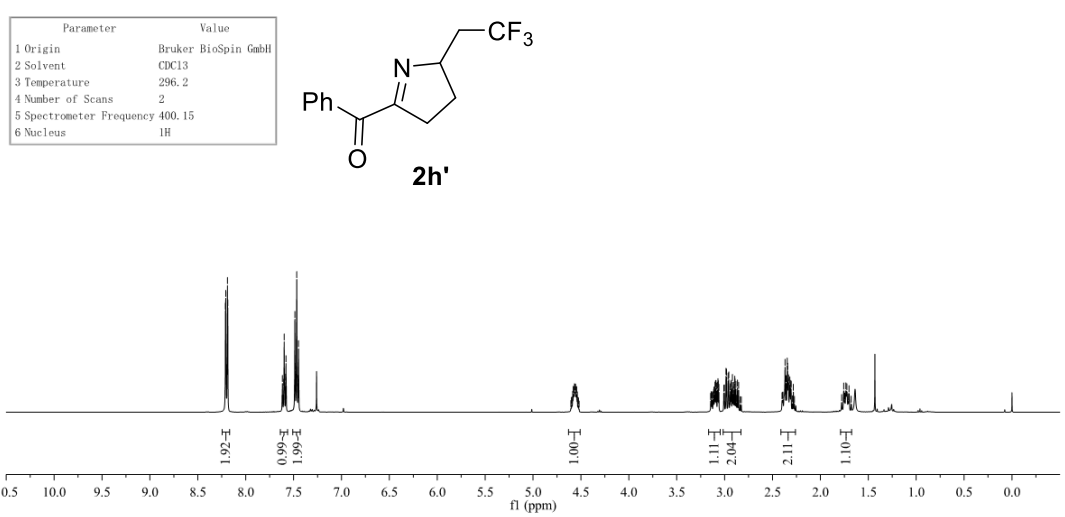

190.374

174.226

135.098  
133.743  
130.549  
130.245  
128.382  
127.493  
124.740  
121.988

68.988  
68.962  
68.935  
68.909

40.125  
39.850  
39.574  
39.297  
36.308  
28.259

| Parameter                | Value               |
|--------------------------|---------------------|
| 1 Origin                 | Bruker BioSpin GmbH |
| 2 Solvent                | CDCl3               |
| 3 Temperature            | 298.2               |
| 4 Number of Scans        | 1024                |
| 5 Spectrometer Frequency | 100.61              |
| 6 Nucleus                | 13C                 |

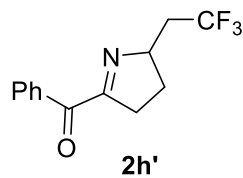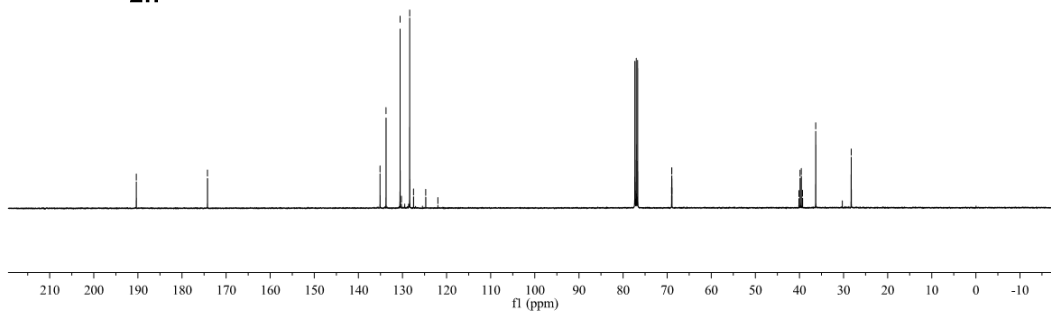

| Parameter                | Value               |
|--------------------------|---------------------|
| 1 Origin                 | Bruker BioSpin GmbH |
| 2 Solvent                | CDCl3               |
| 3 Temperature            | 296.3               |
| 4 Number of Scans        | 2                   |
| 5 Spectrometer Frequency | 376.52              |
| 6 Nucleus                | 19F                 |

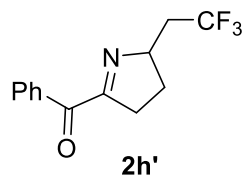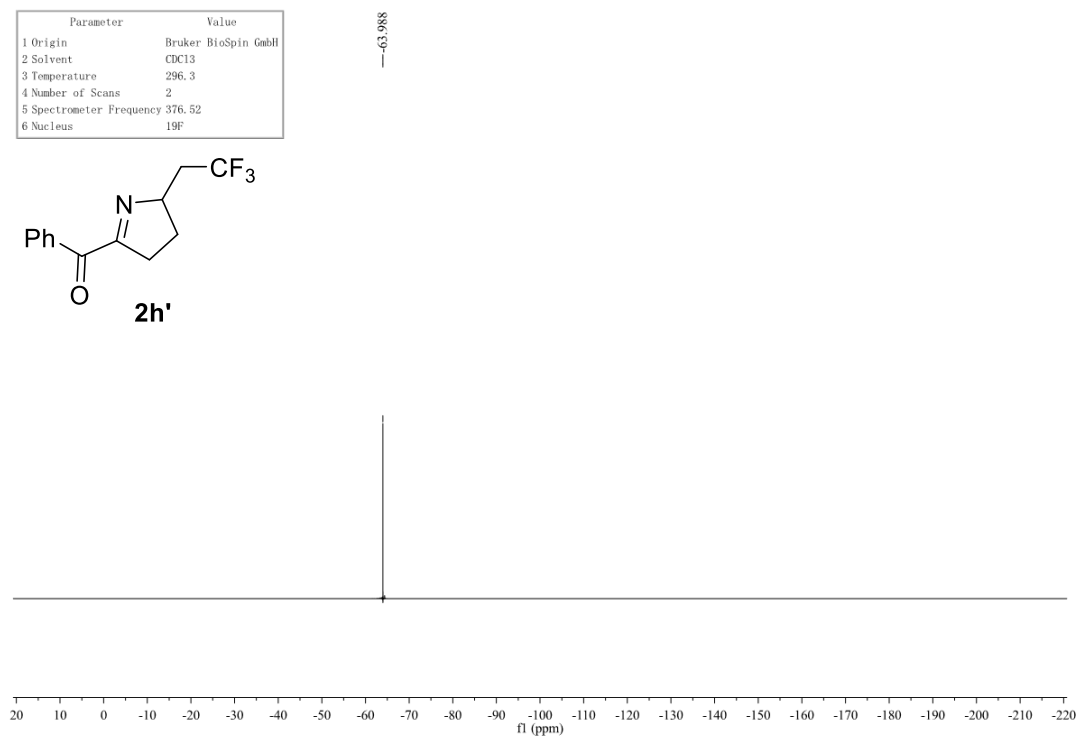

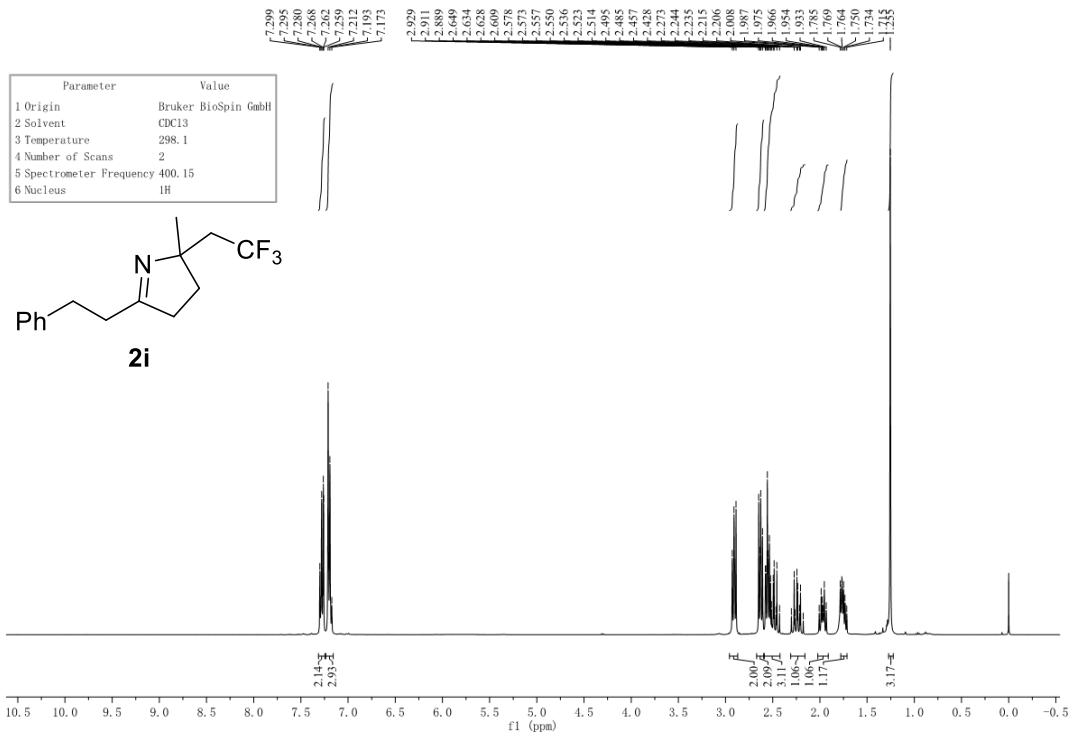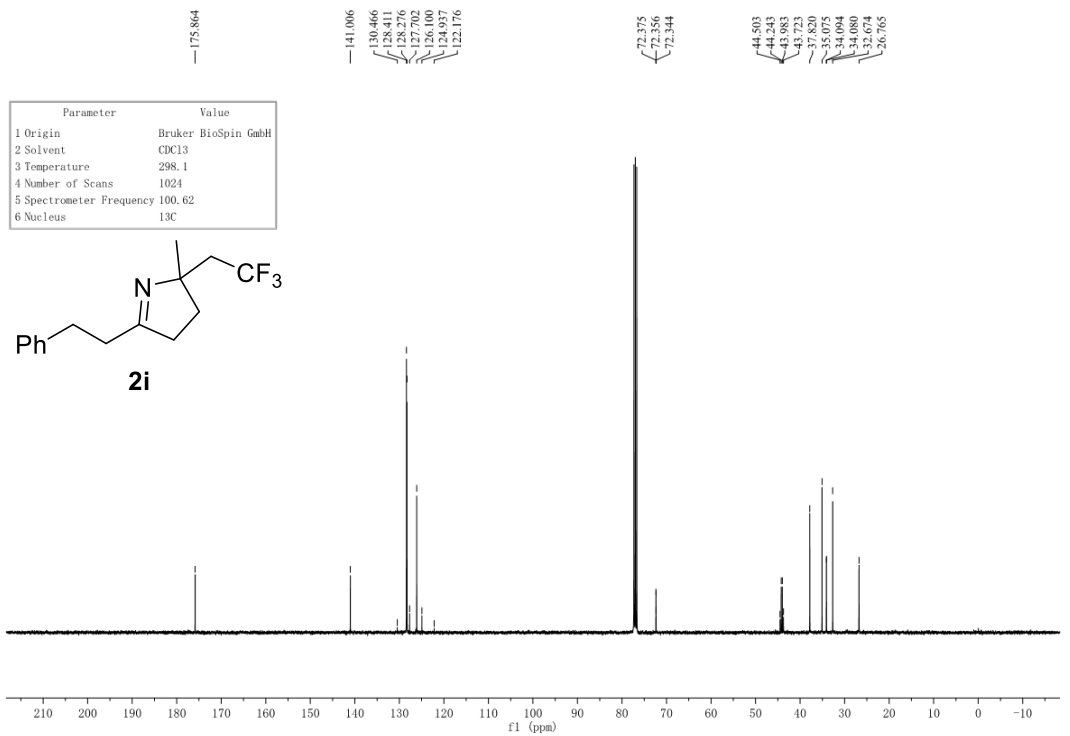

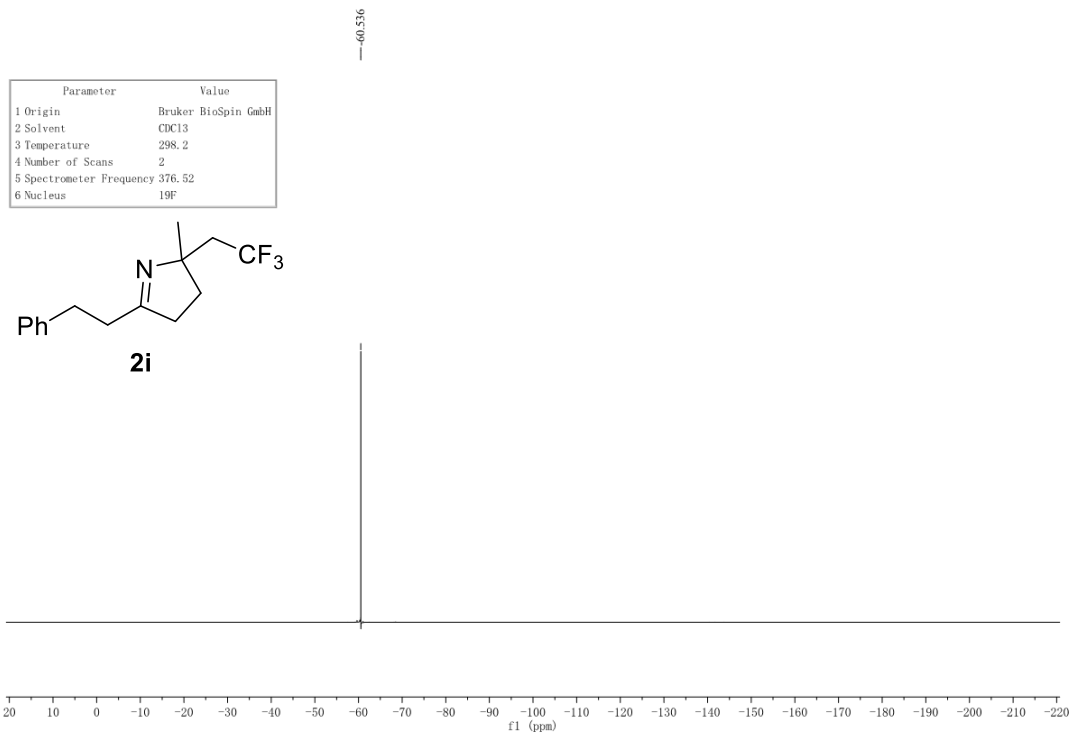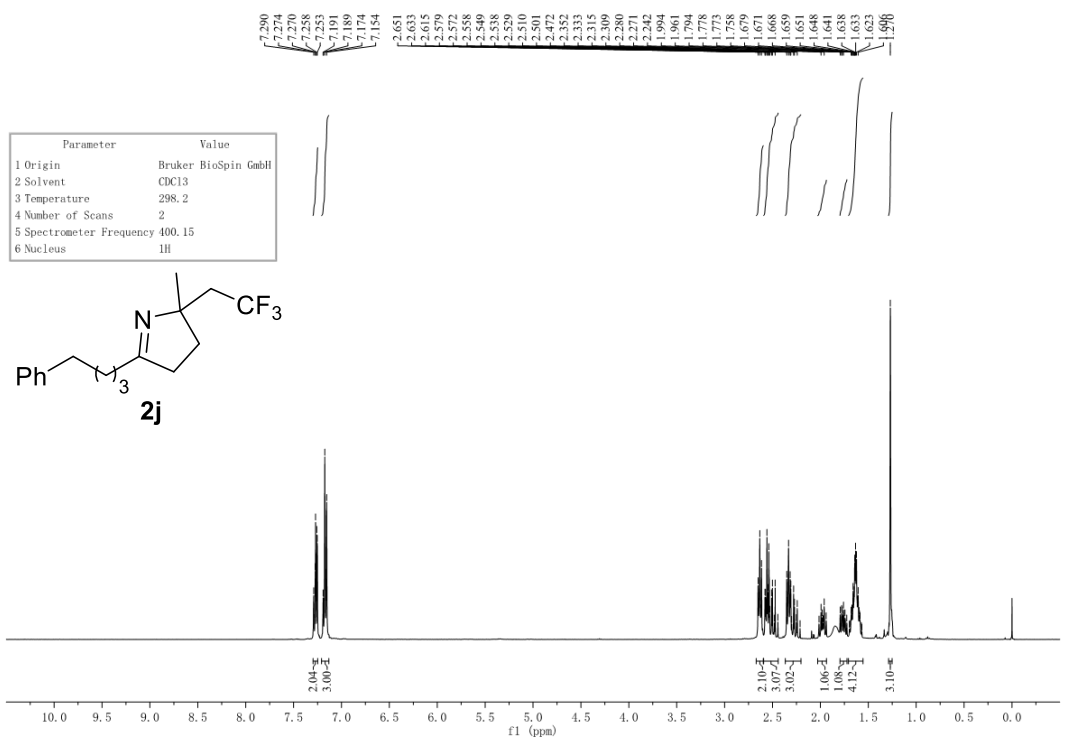

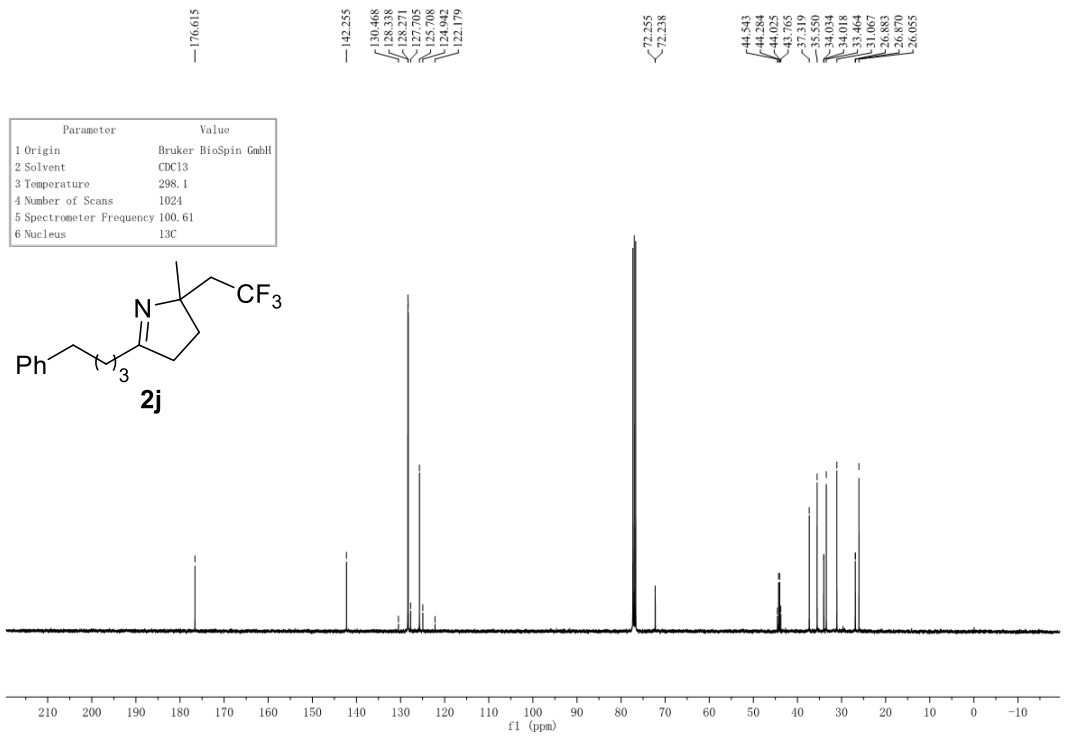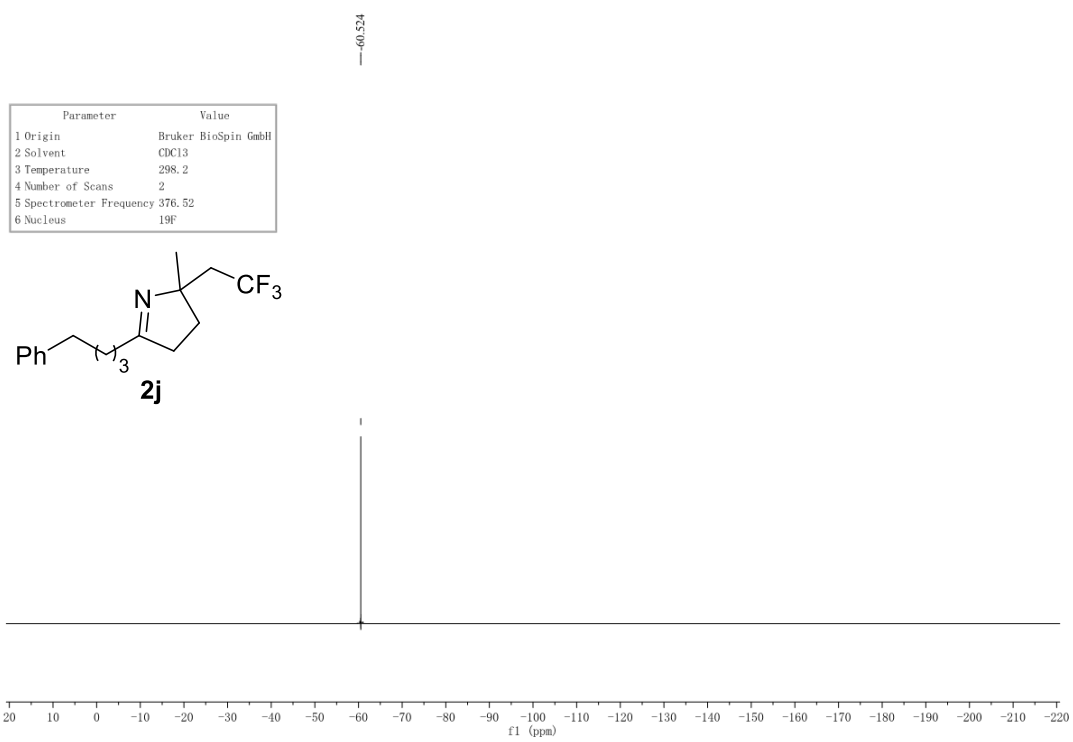



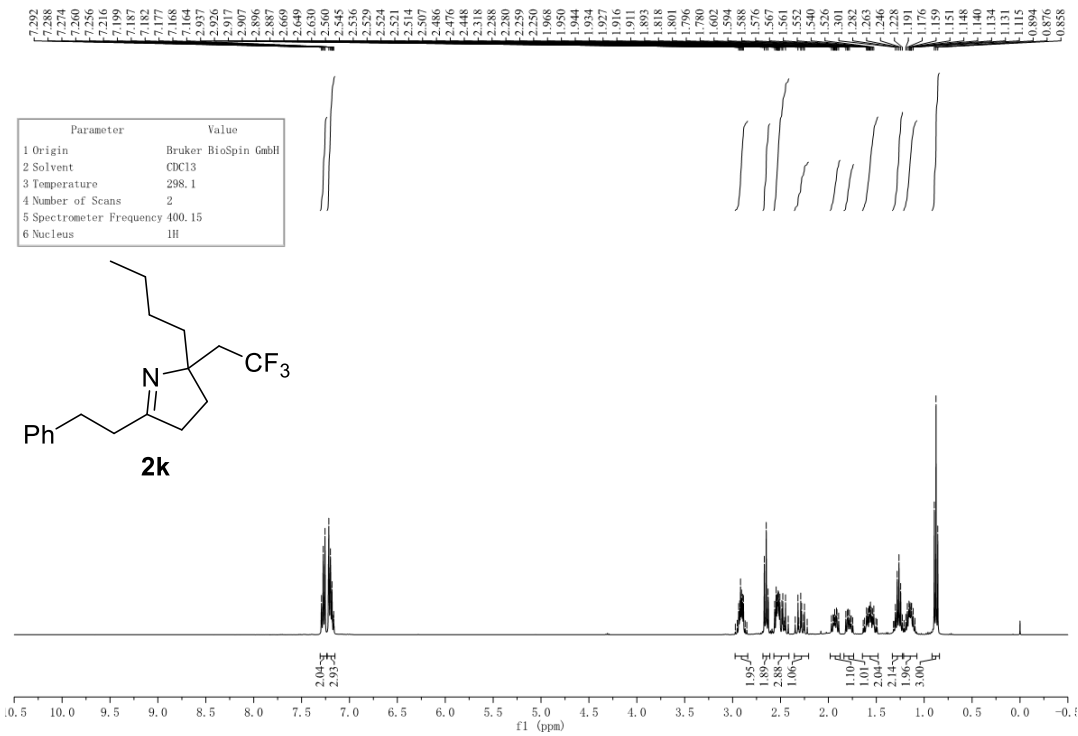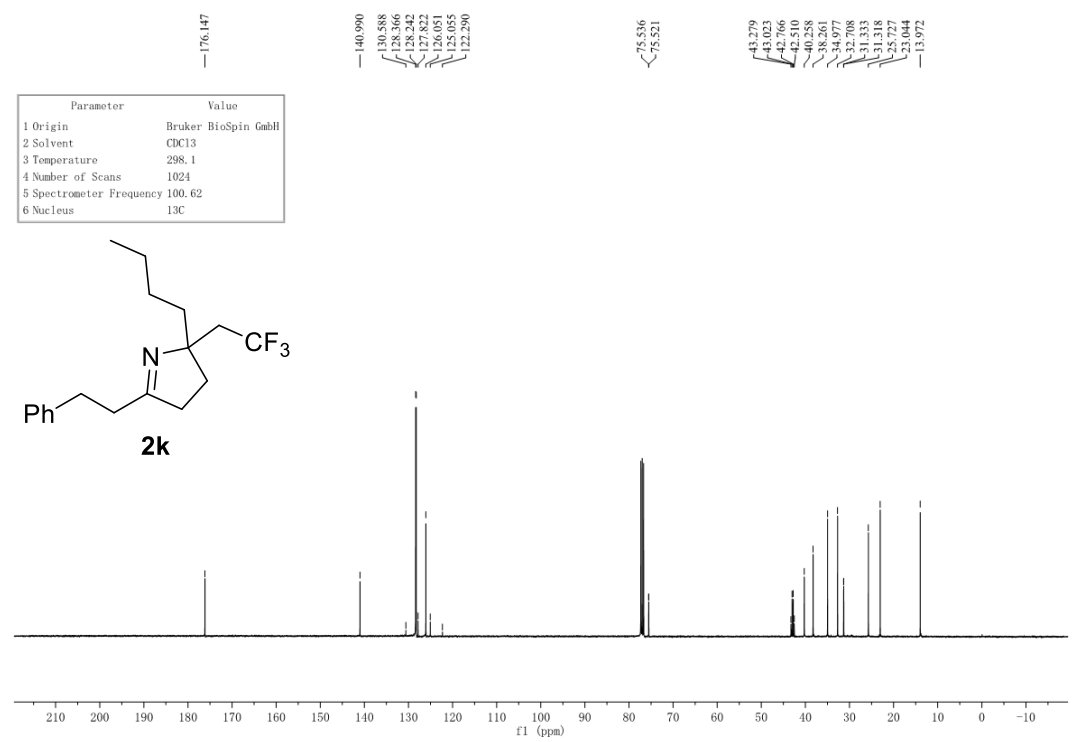

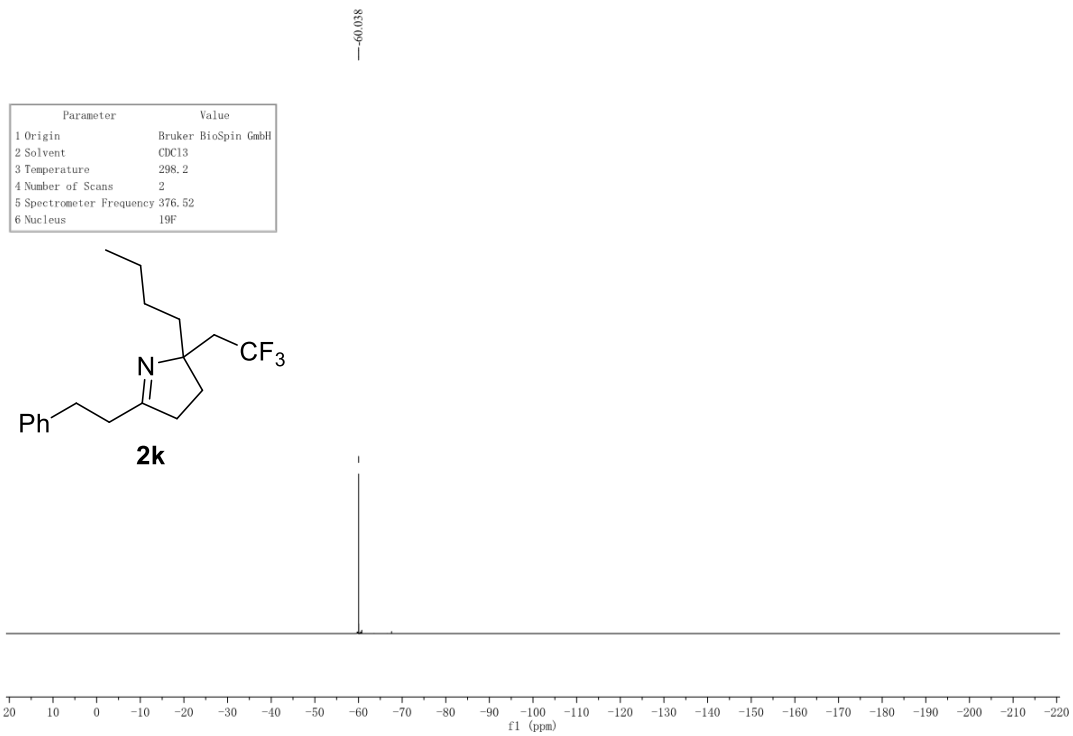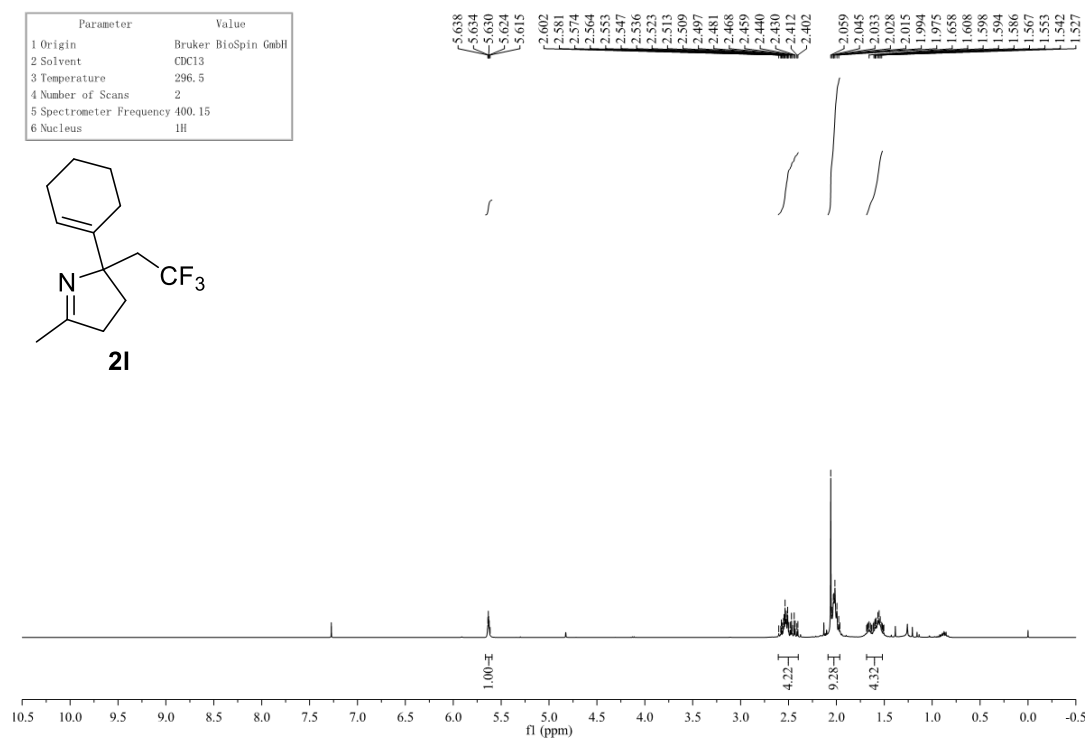

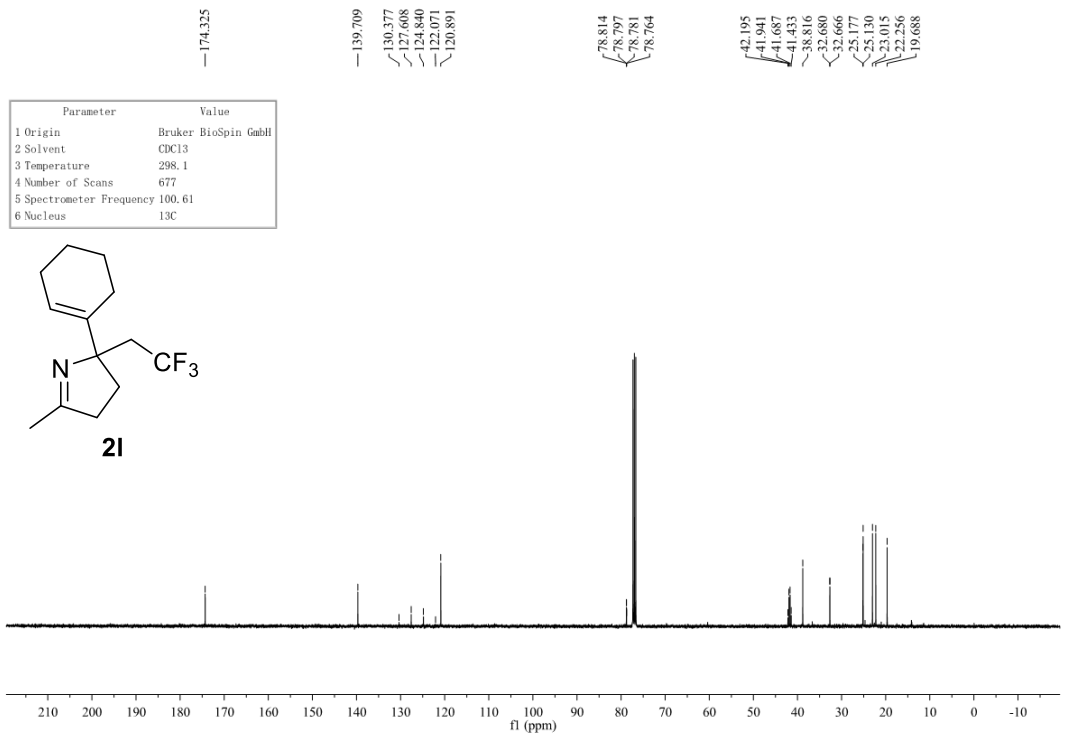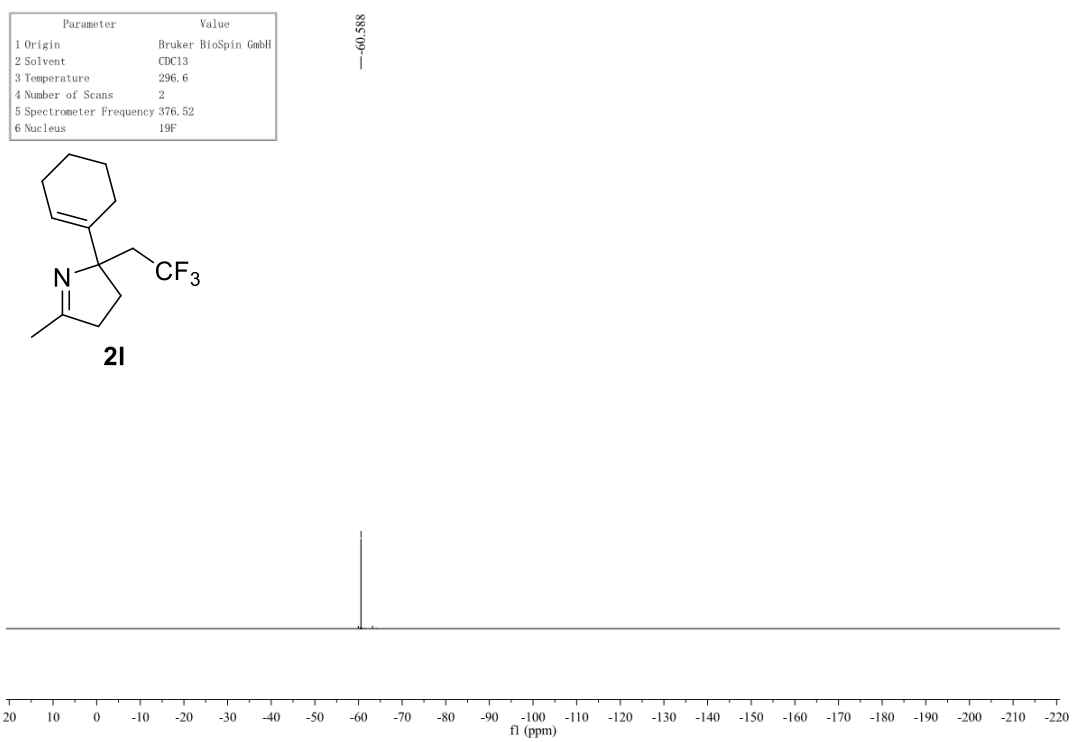

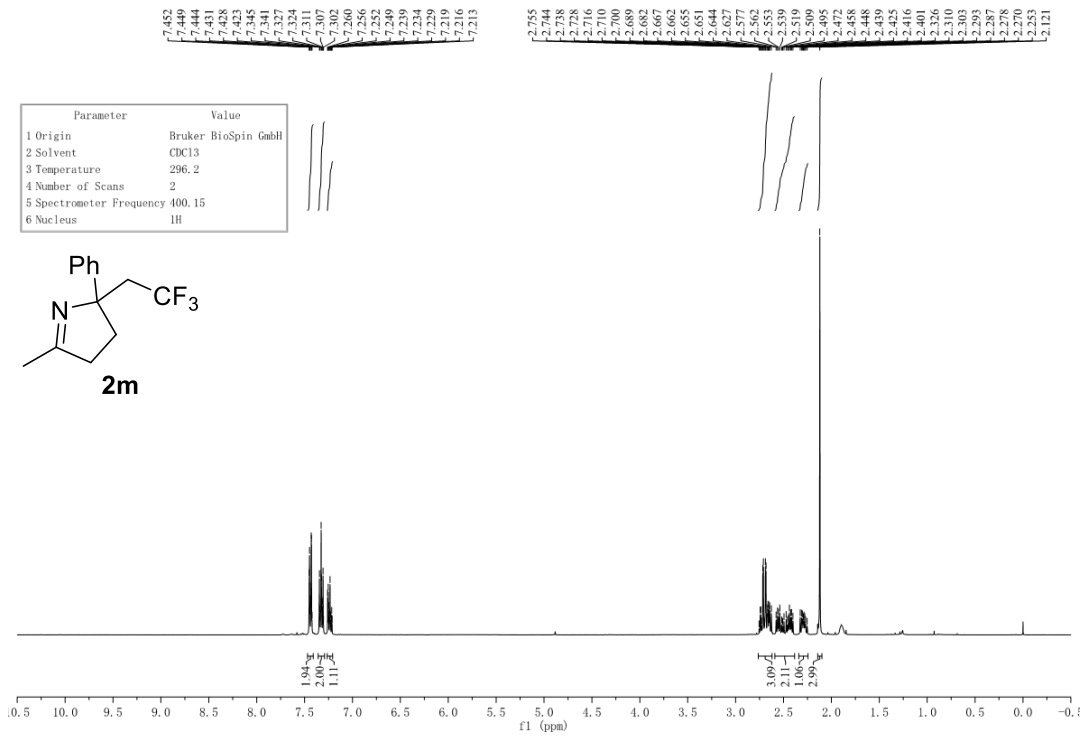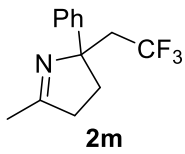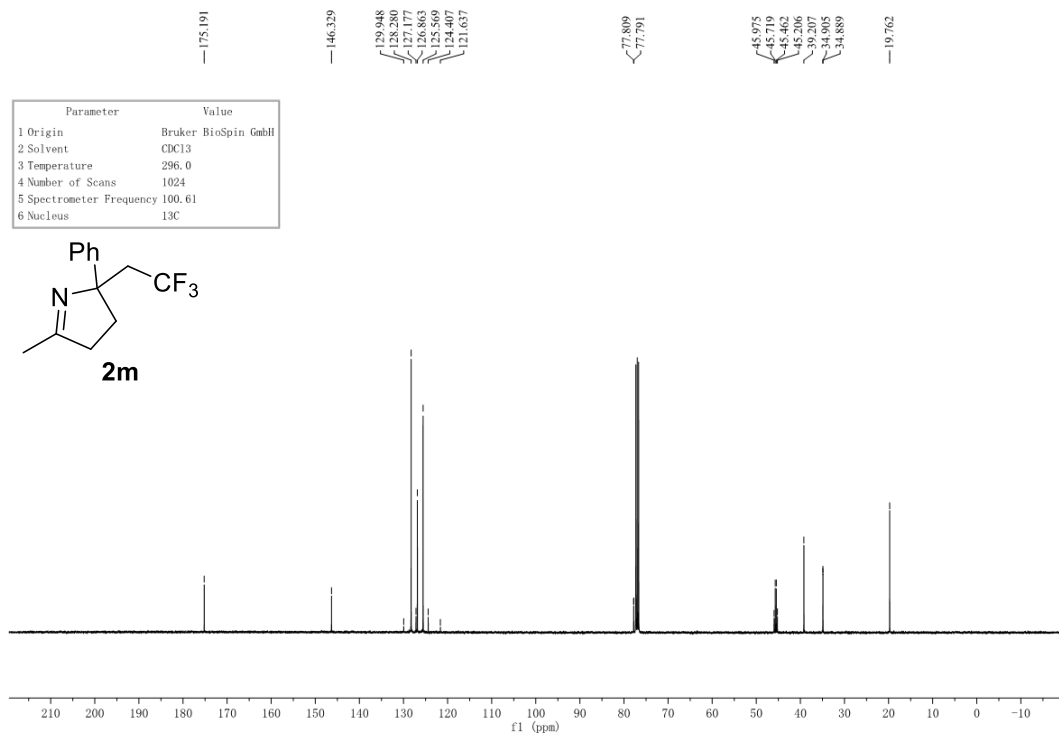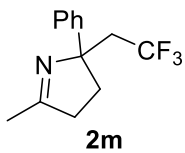

| Parameter                | Value               |
|--------------------------|---------------------|
| 1 Origin                 | Bruker BioSpin GmbH |
| 2 Solvent                | CDCl3               |
| 3 Temperature            | 296.2               |
| 4 Number of Scans        | 2                   |
| 5 Spectrometer Frequency | 376.52              |
| 6 Nucleus                | 19F                 |

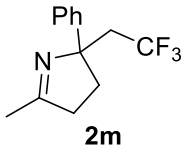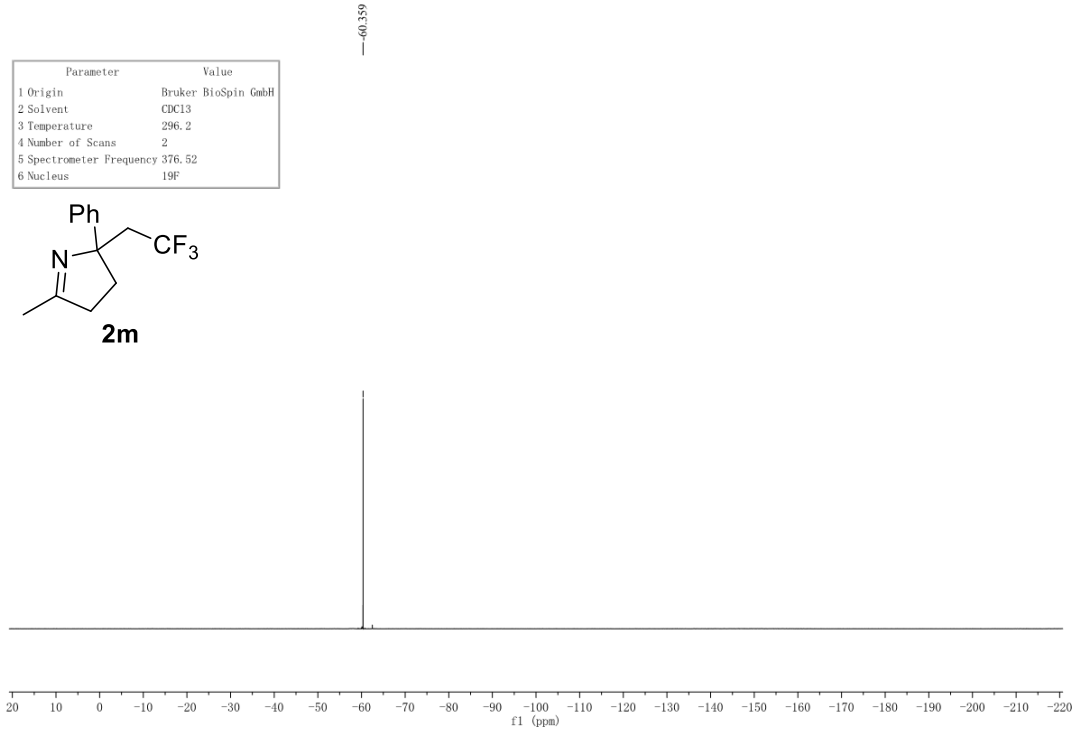

| Parameter                | Value               |
|--------------------------|---------------------|
| 1 Origin                 | Bruker BioSpin GmbH |
| 2 Solvent                | CDCl3               |
| 3 Temperature            | 298.2               |
| 4 Number of Scans        | 2                   |
| 5 Spectrometer Frequency | 400.15              |
| 6 Nucleus                | 1H                  |

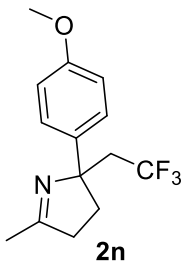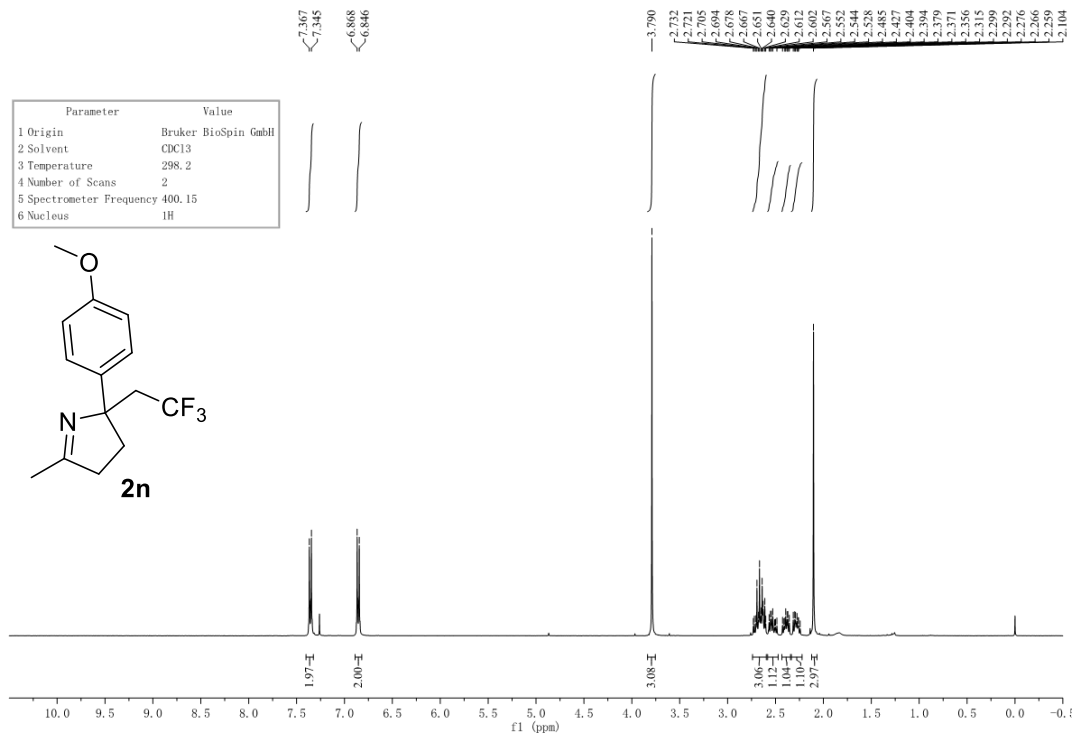

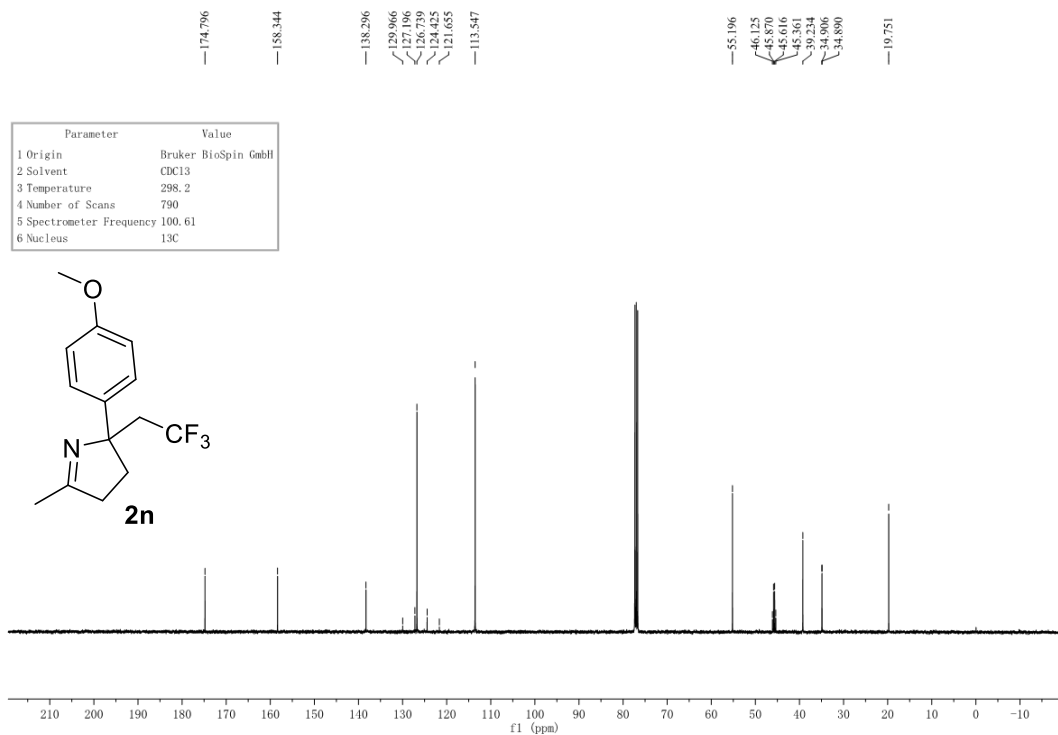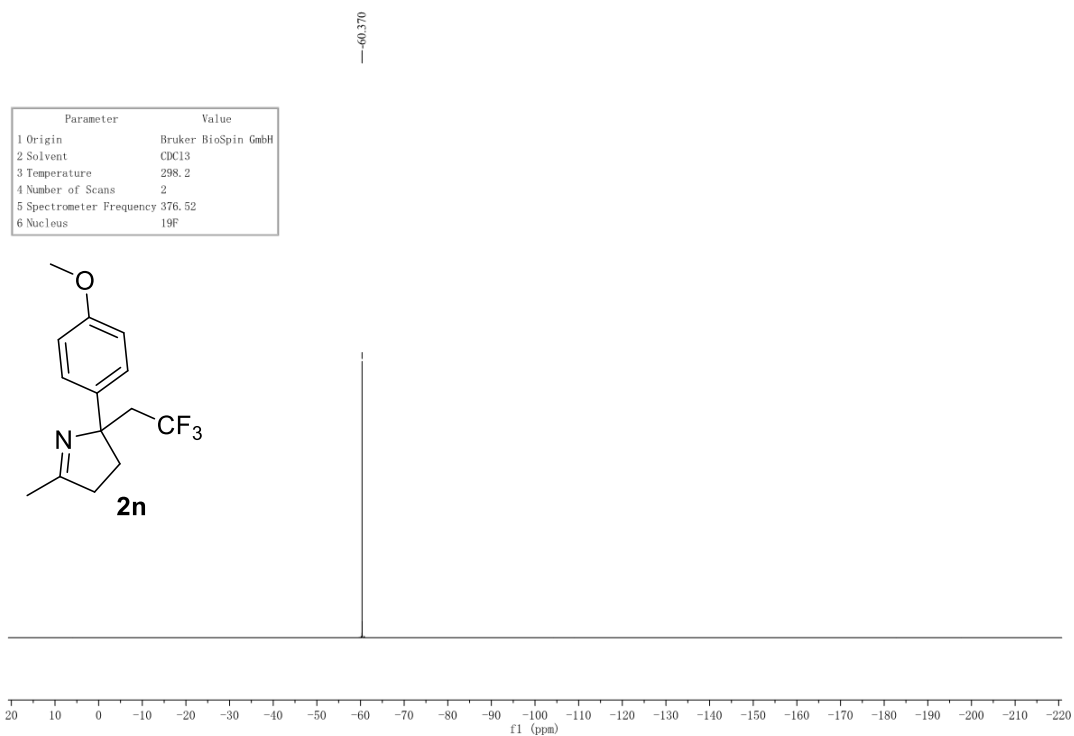

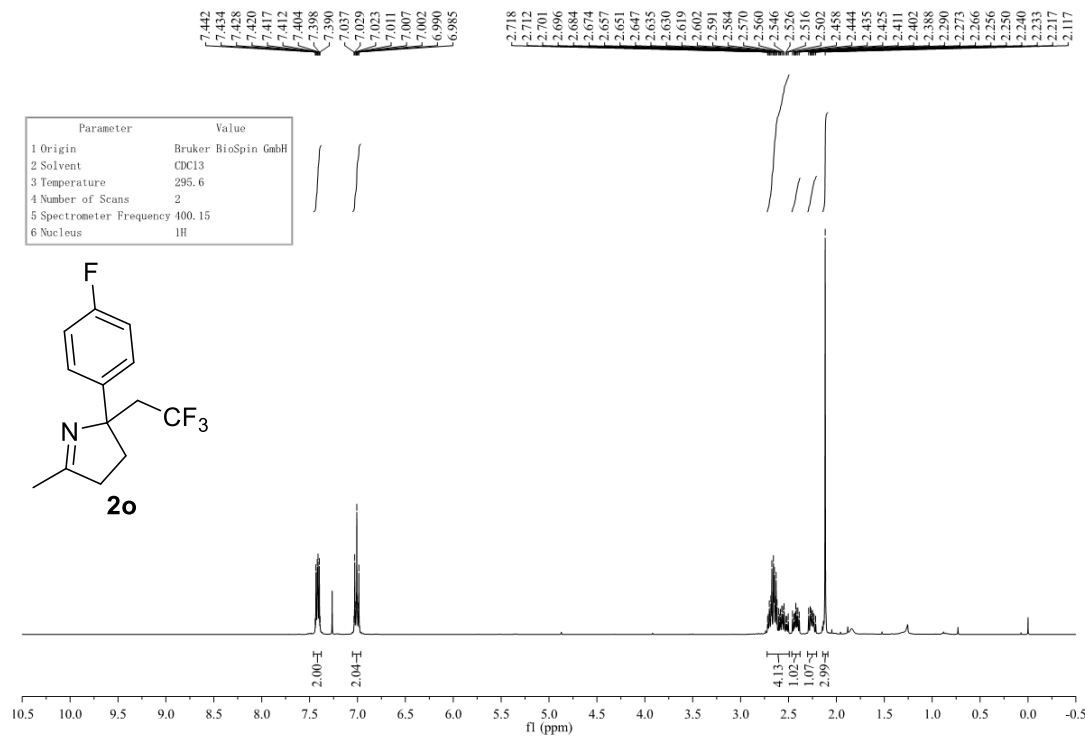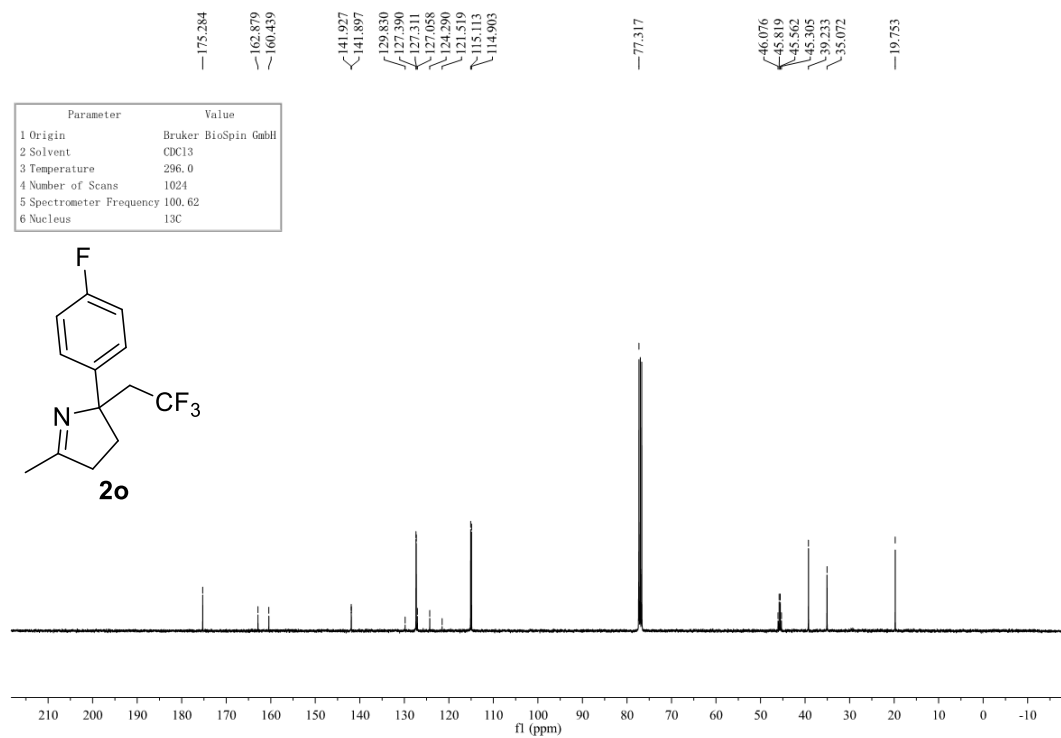

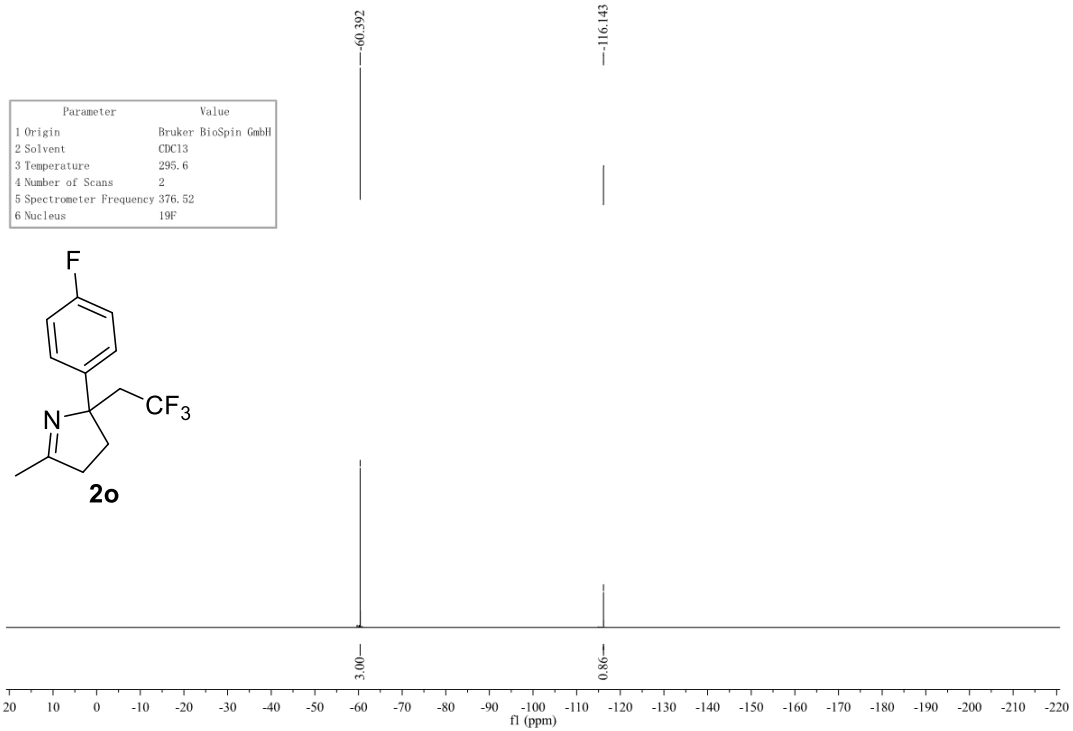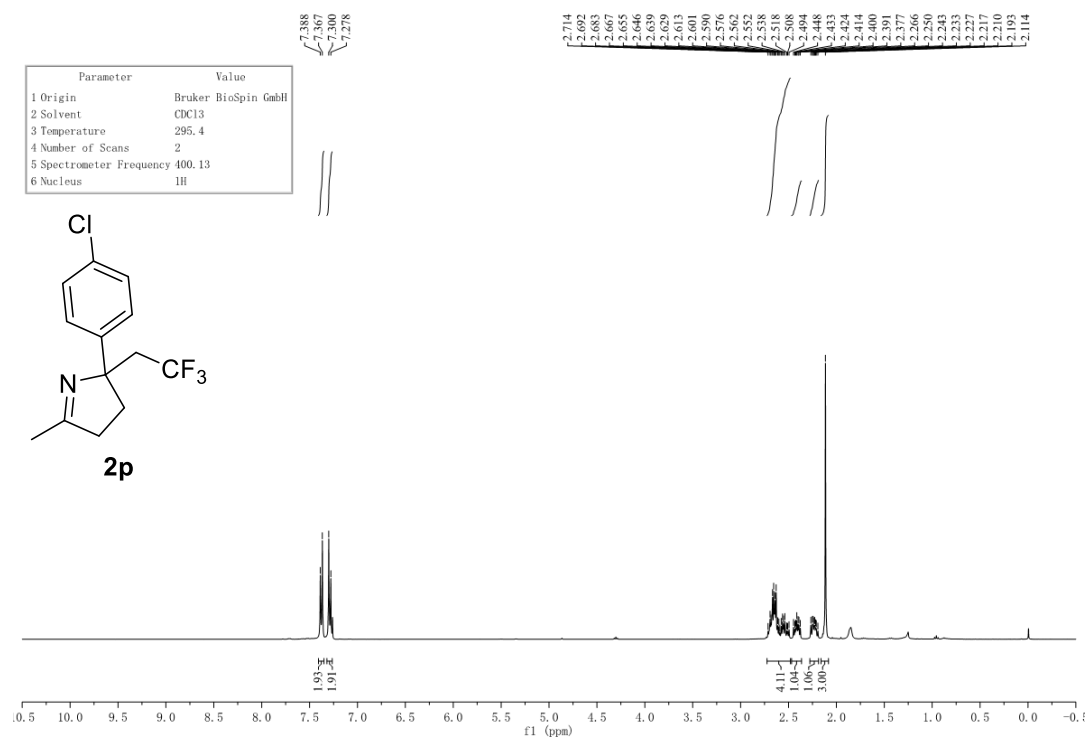



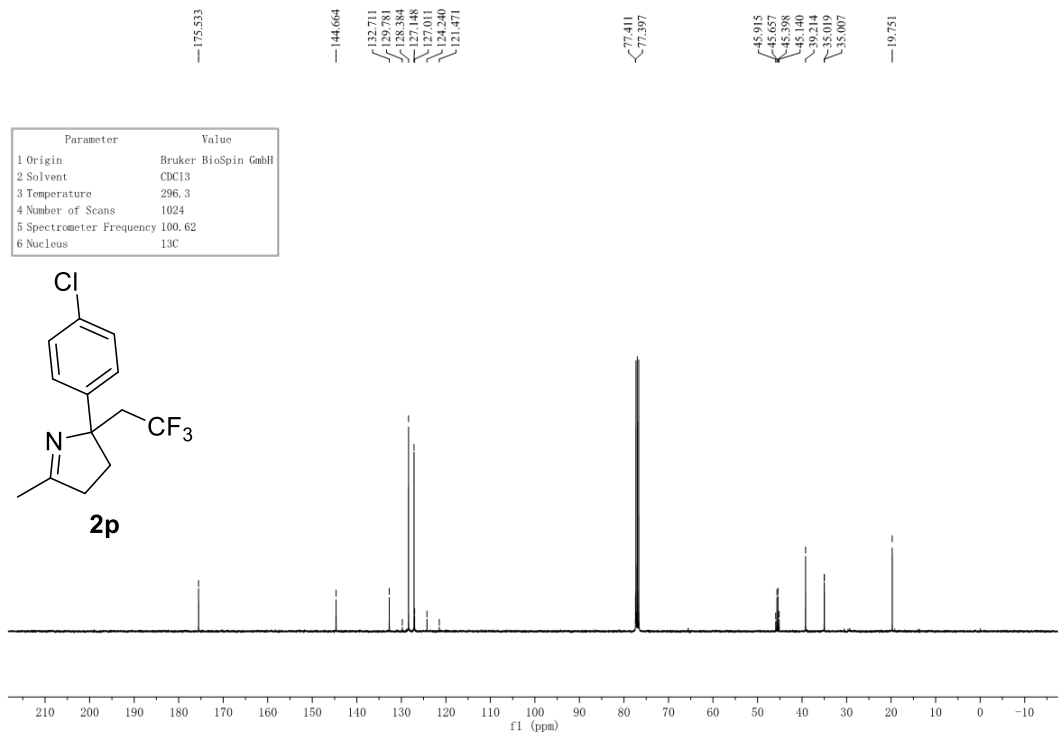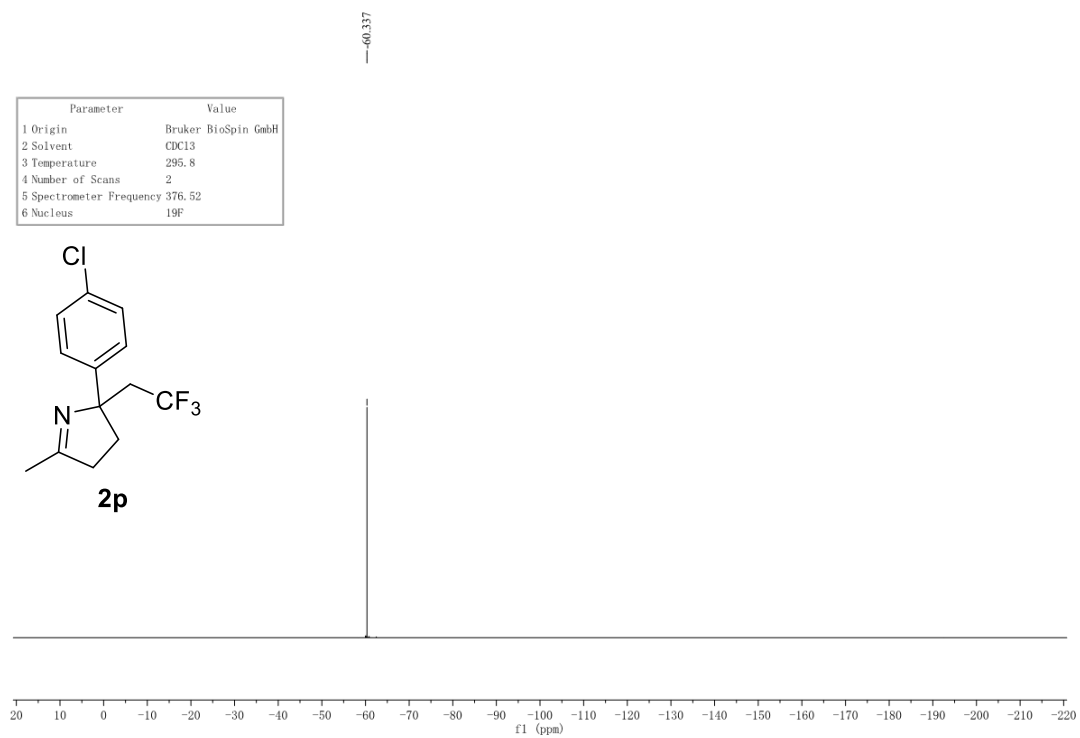

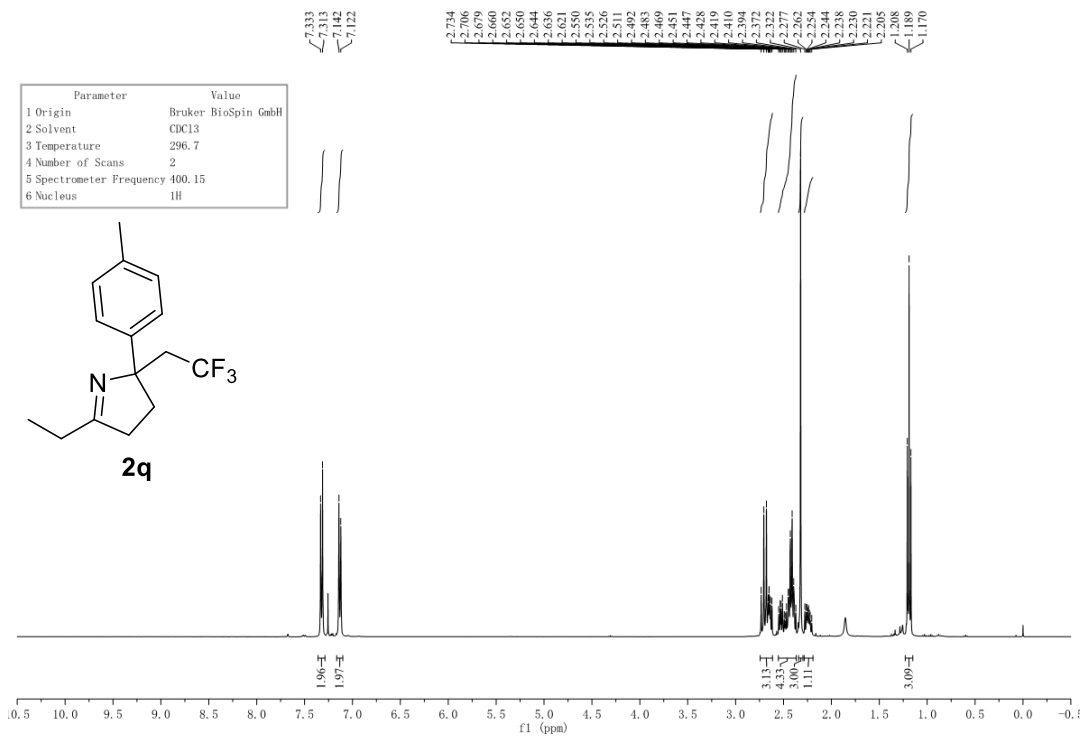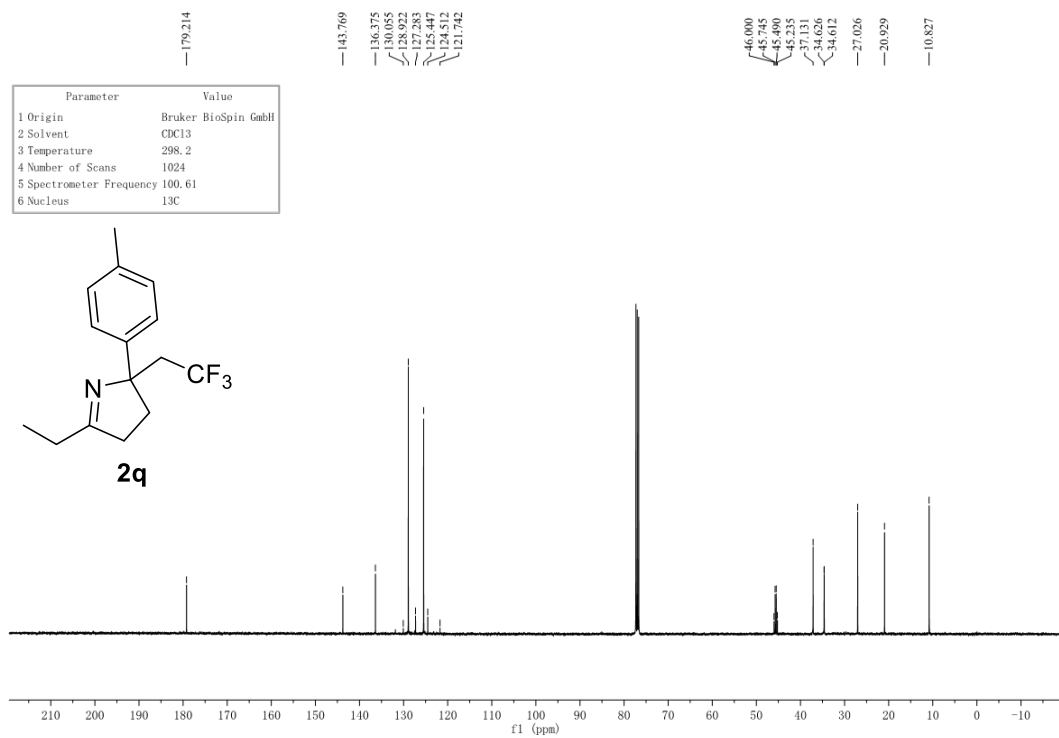

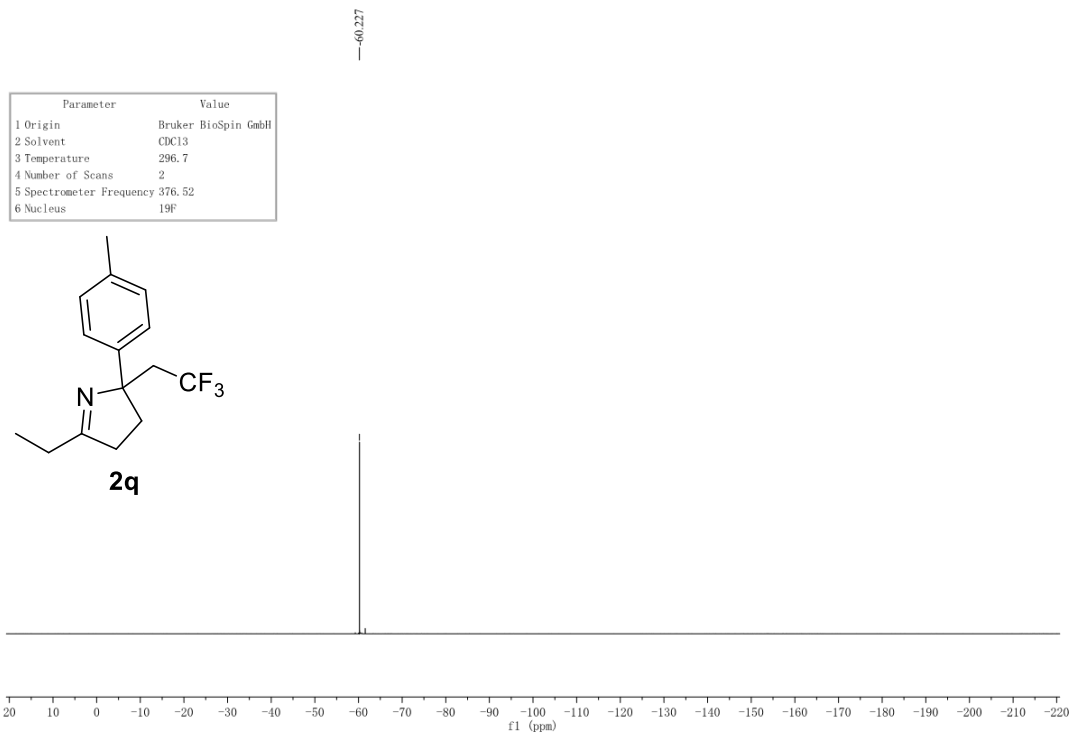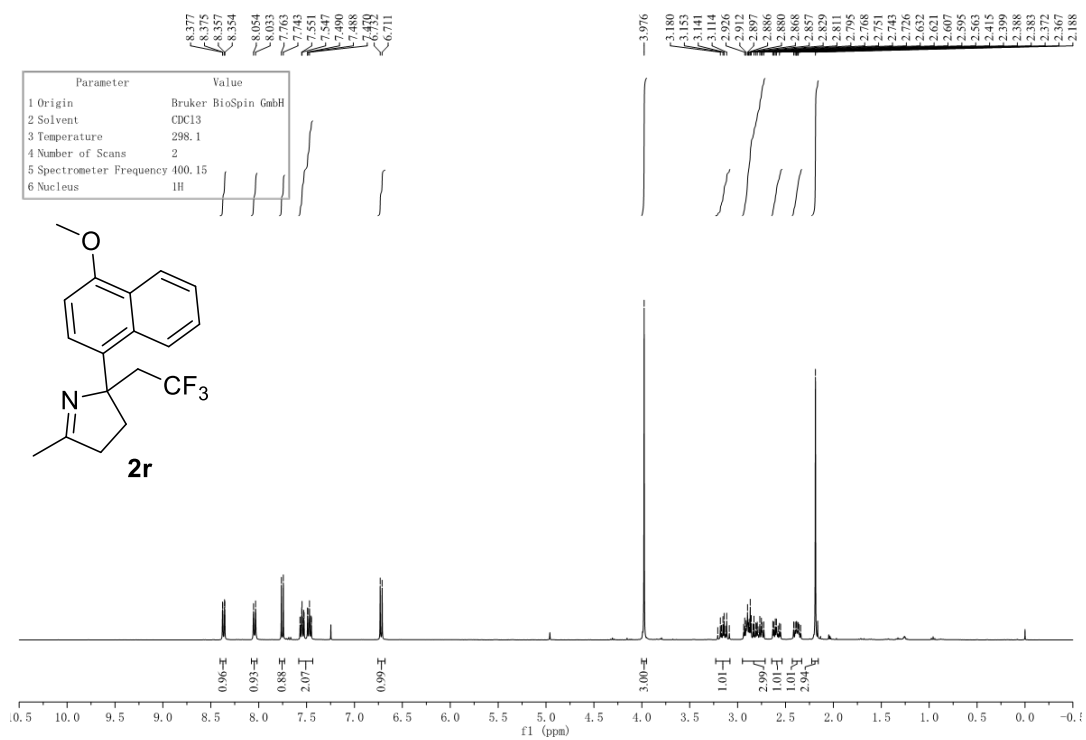

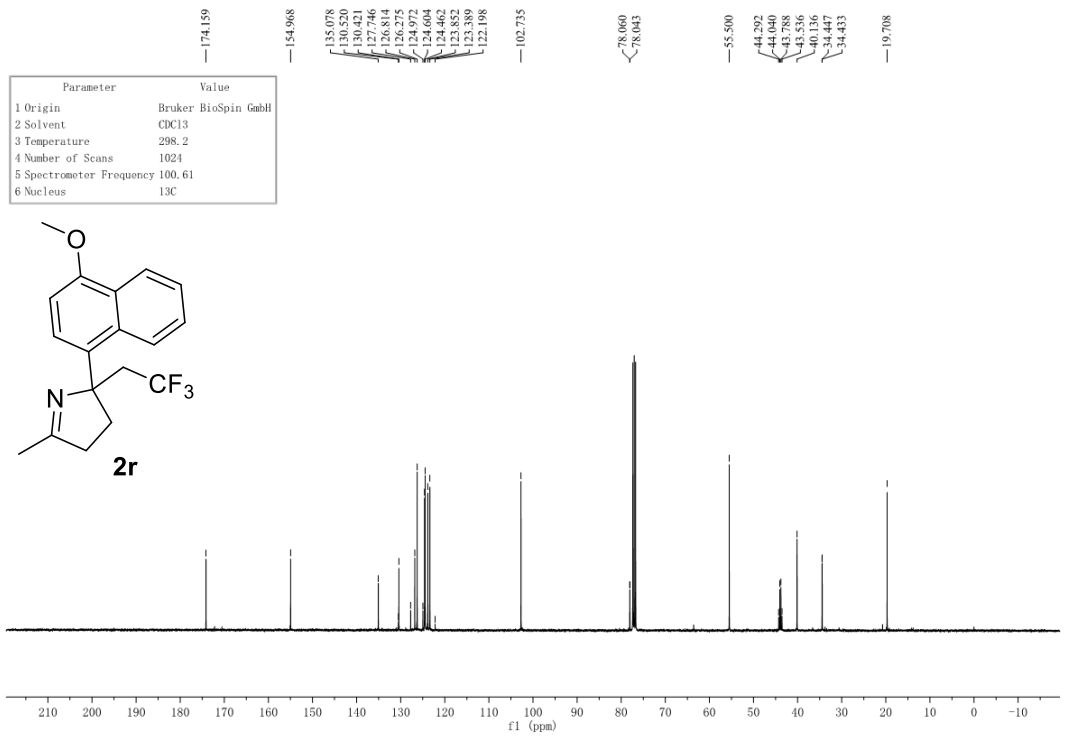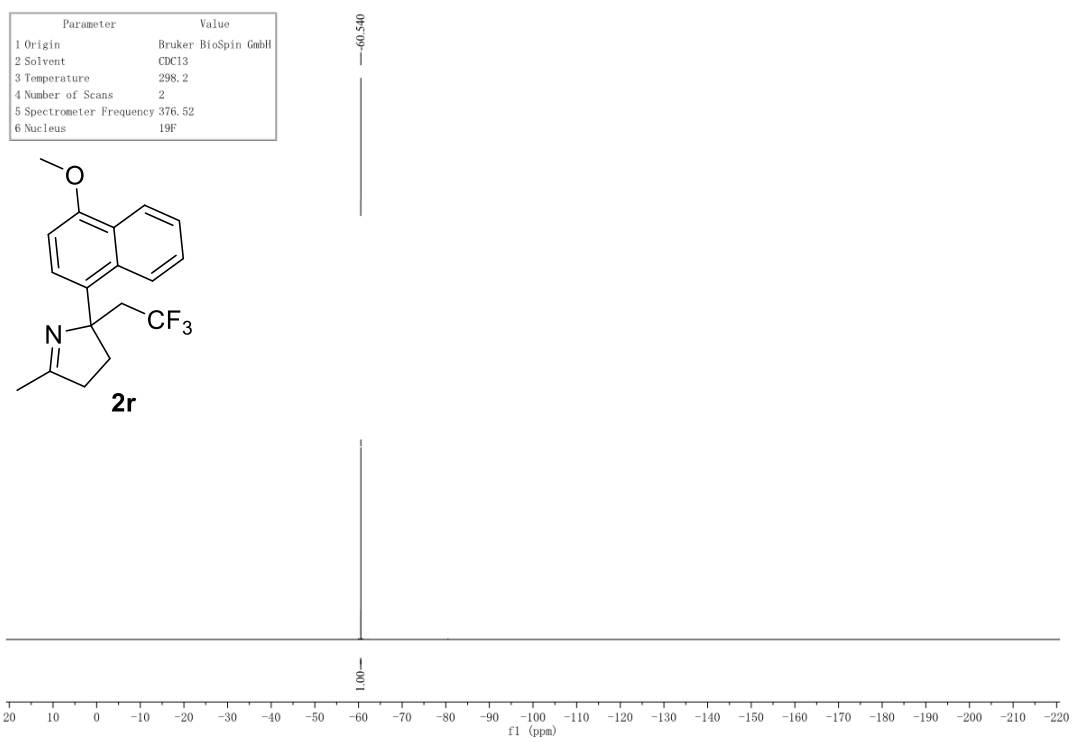

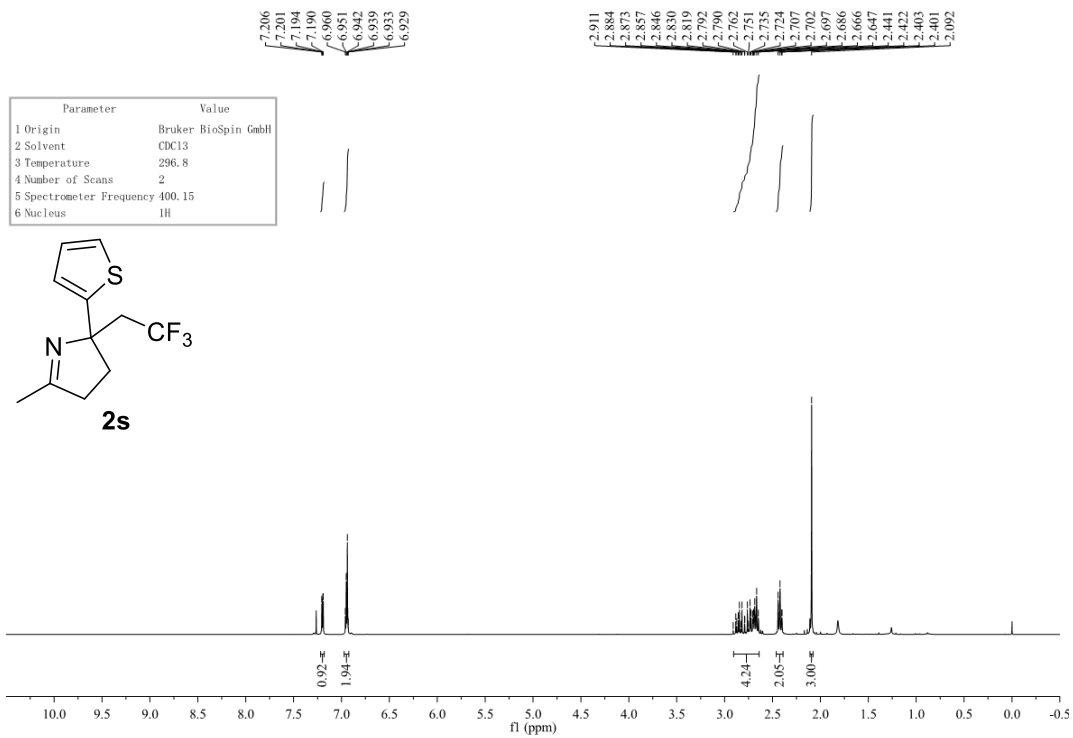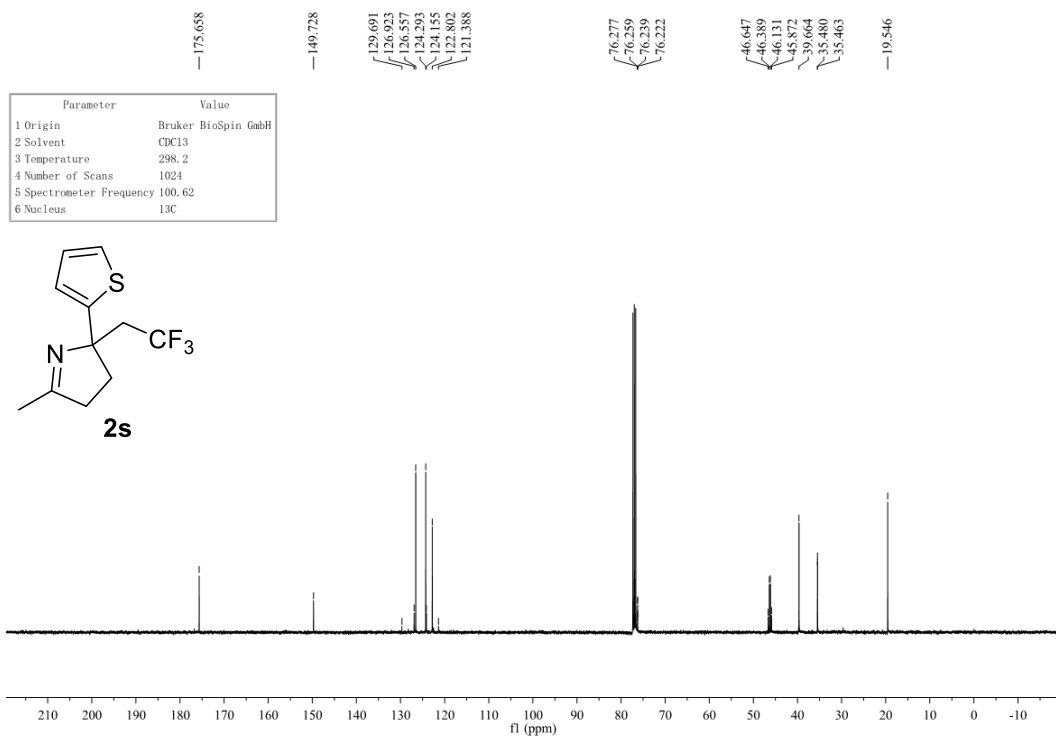

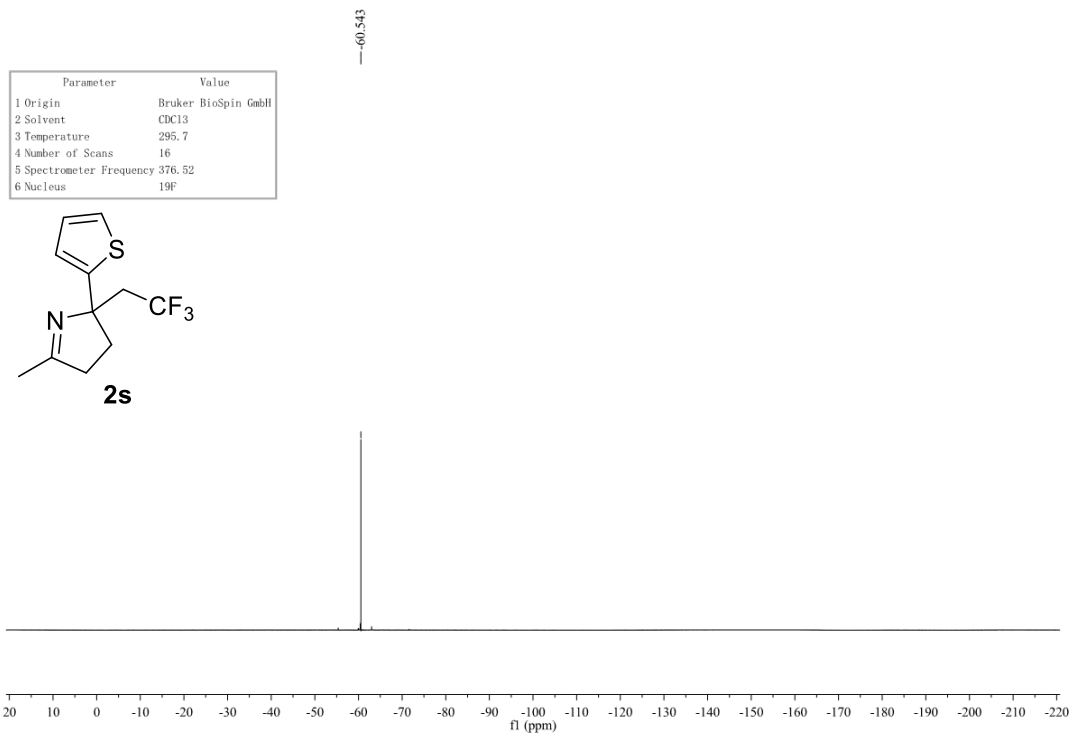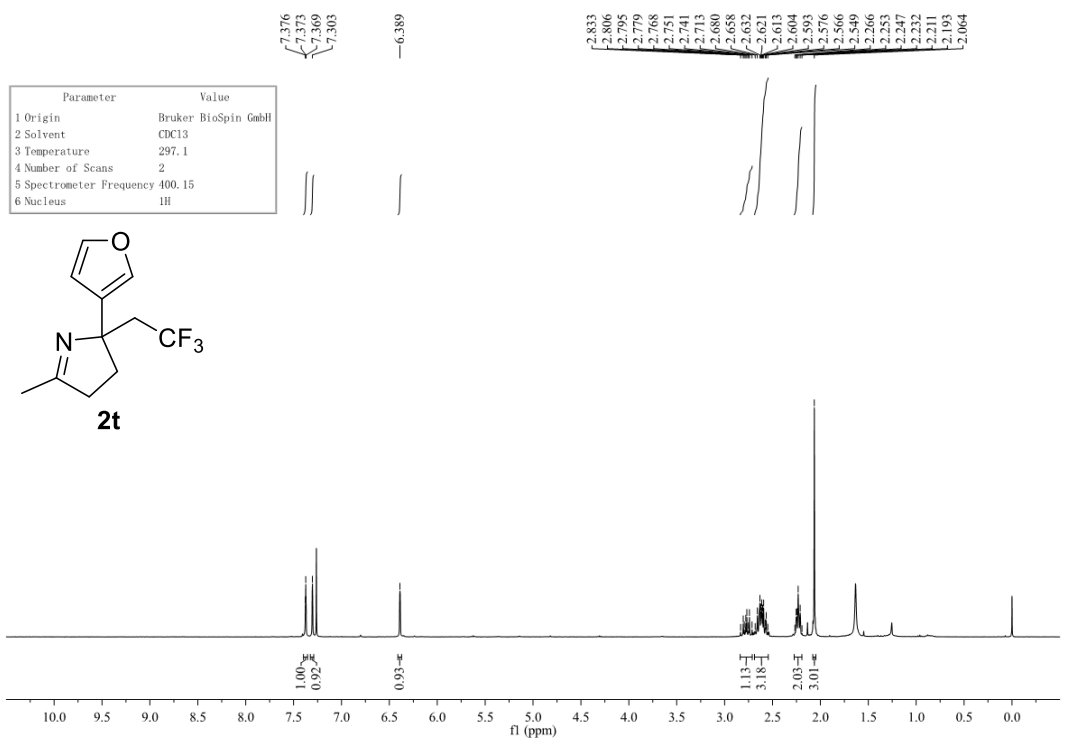

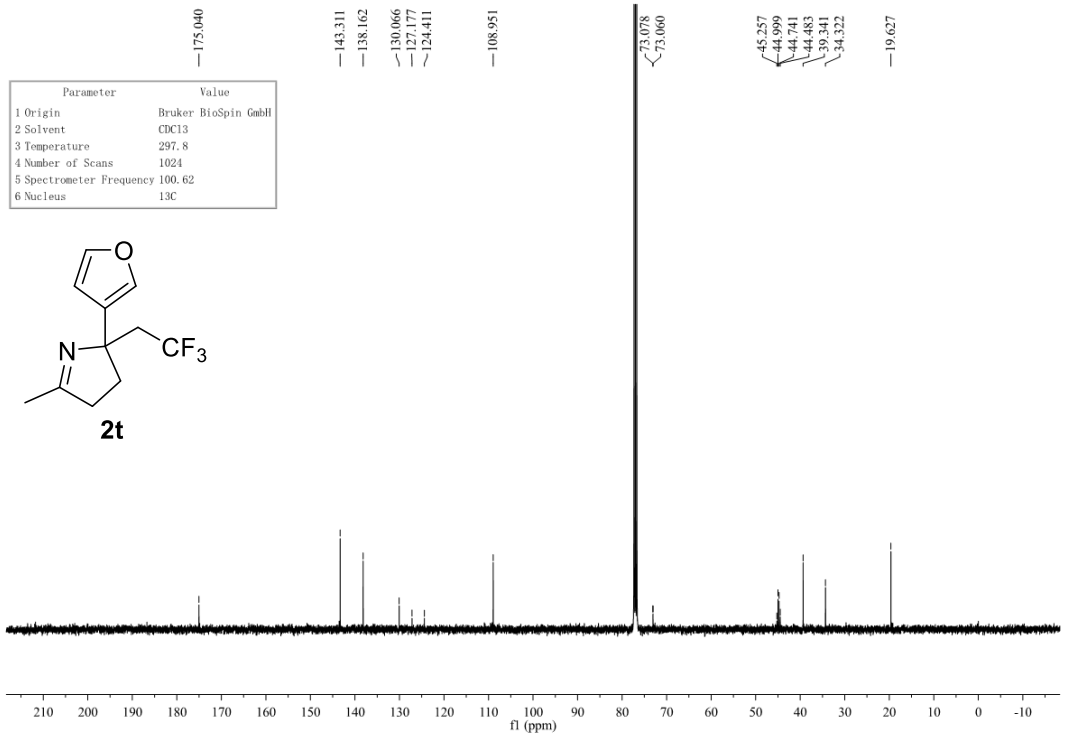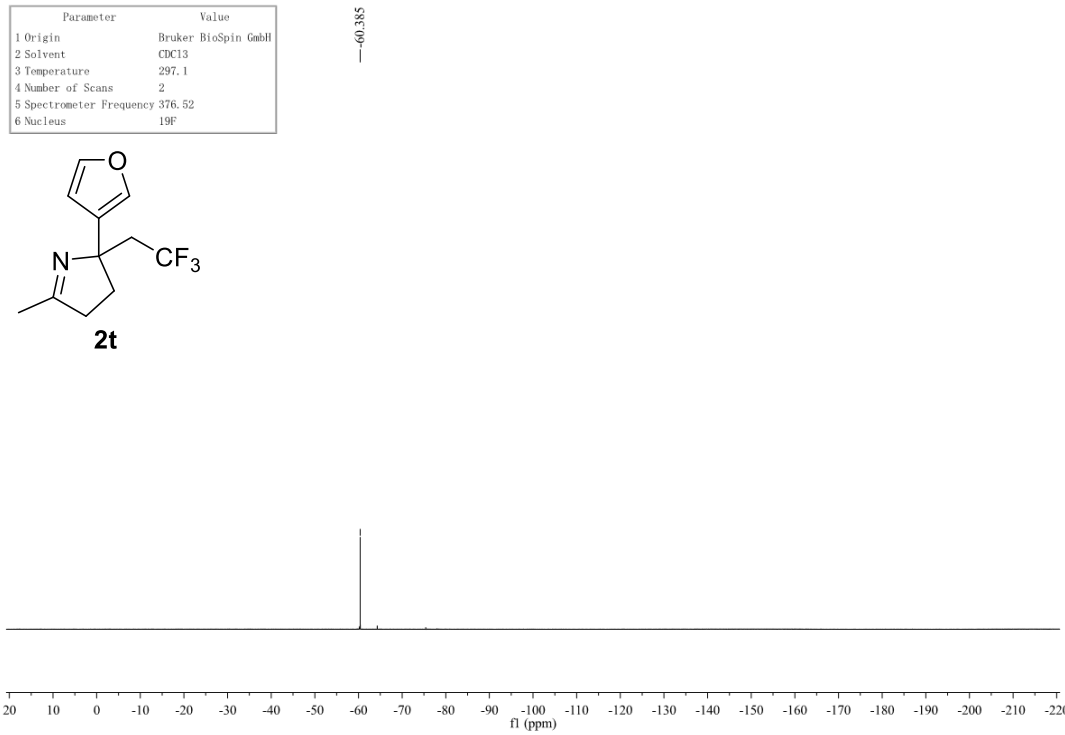

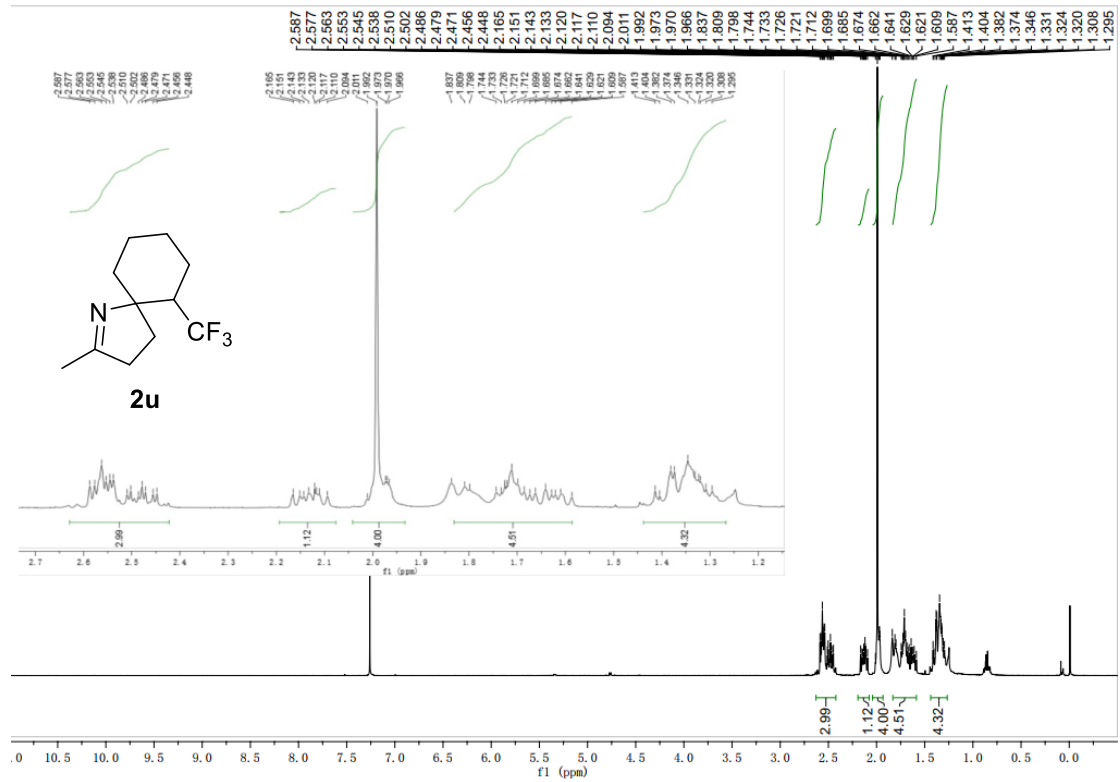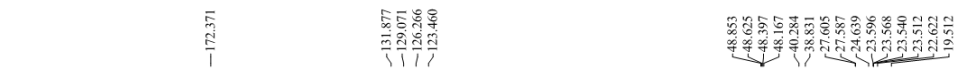

| Parameter                | Value               |
|--------------------------|---------------------|
| 1 Origin                 | Bruker BioSpin GmbH |
| 2 Solvent                | CDCl3               |
| 3 Temperature            | 296.4               |
| 4 Number of Scans        | 1024                |
| 5 Spectrometer Frequency | 100.62              |
| 6 Nucleus                | 13C                 |

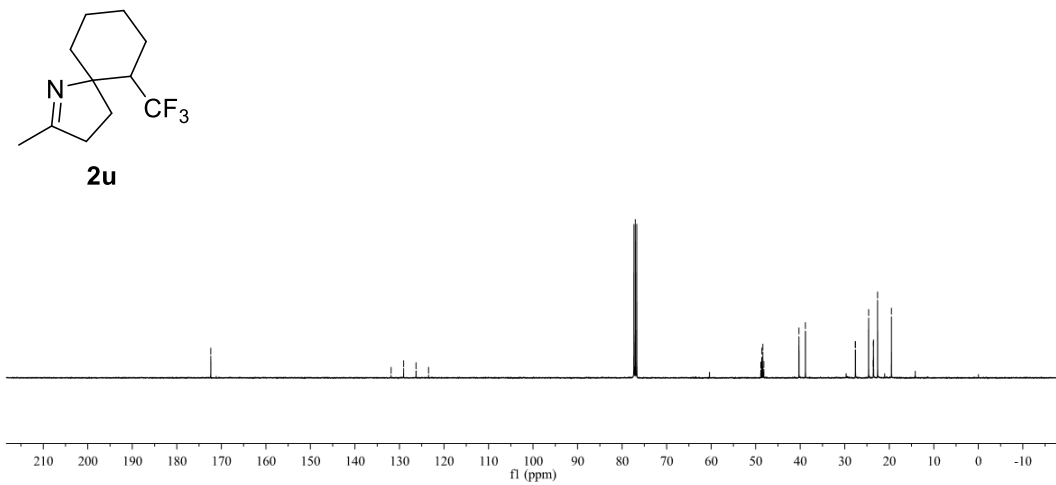



| Parameter                | Value               |
|--------------------------|---------------------|
| 1 Origin                 | Bruker BioSpin GmbH |
| 2 Solvent                | CDCl3               |
| 3 Temperature            | 296.4               |
| 4 Number of Scans        | 2                   |
| 5 Spectrometer Frequency | 376.52              |
| 6 Nucleus                | 19F                 |

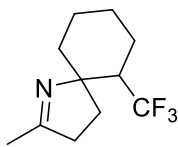

**2u**

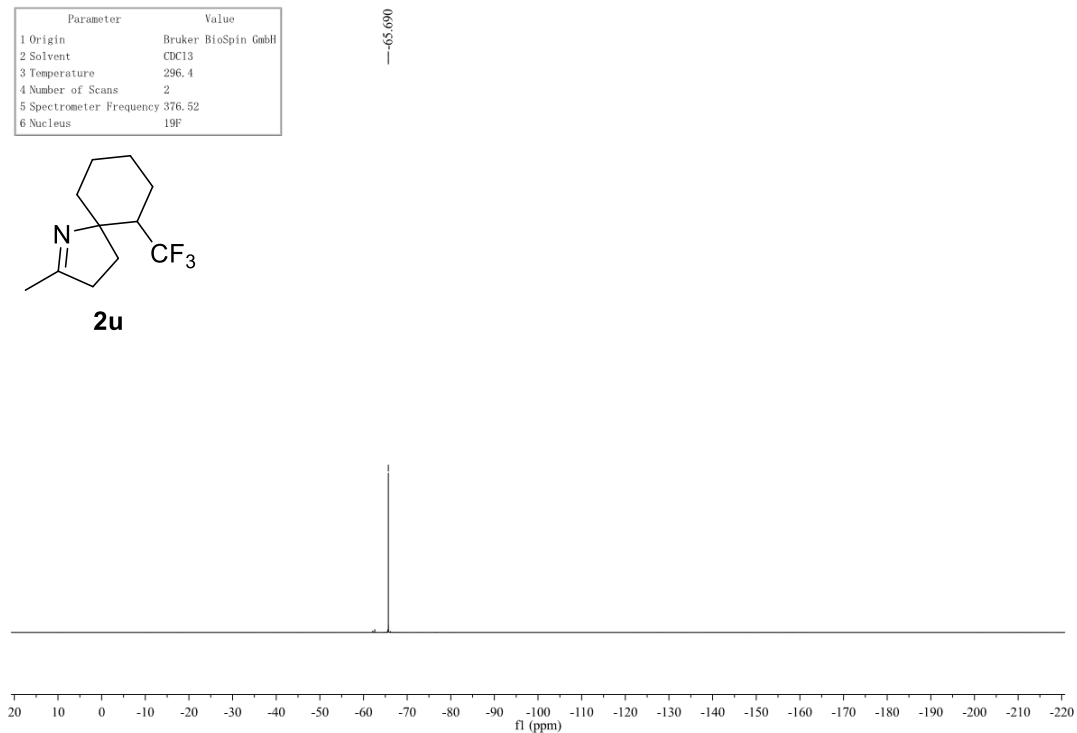

7.845  
7.841  
7.830  
7.825  
7.821  
7.469  
7.450  
7.443  
7.439  
7.434  
7.430  
7.426  
7.419  
7.415  
7.412  
7.390  
7.386  
7.380  
4.432  
4.426  
4.421  
4.415  
4.408  
4.402  
4.397  
3.147  
3.143  
3.138  
3.128  
3.122  
3.118  
3.112  
3.110  
3.105  
3.100  
3.095  
3.085  
3.080  
3.075  
3.070  
2.989  
2.984  
2.966  
2.961  
2.944  
2.939  
2.932  
2.922  
2.913  
2.903  
2.895  
2.884  
2.884  
2.866  
2.856  
2.851  
2.831  
2.820  
2.240  
2.213  
2.203  
2.188  
2.177  
2.151  
1.801  
1.780  
1.756  
1.747  
1.725

| Parameter                | Value               |
|--------------------------|---------------------|
| 1 Origin                 | Bruker BioSpin GmbH |
| 2 Solvent                | CDCl3               |
| 3 Temperature            | 295.6               |
| 4 Number of Scans        | 2                   |
| 5 Spectrometer Frequency | 400.15              |
| 6 Nucleus                | 1H                  |

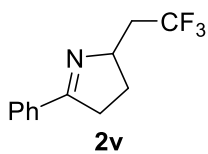

**2v**

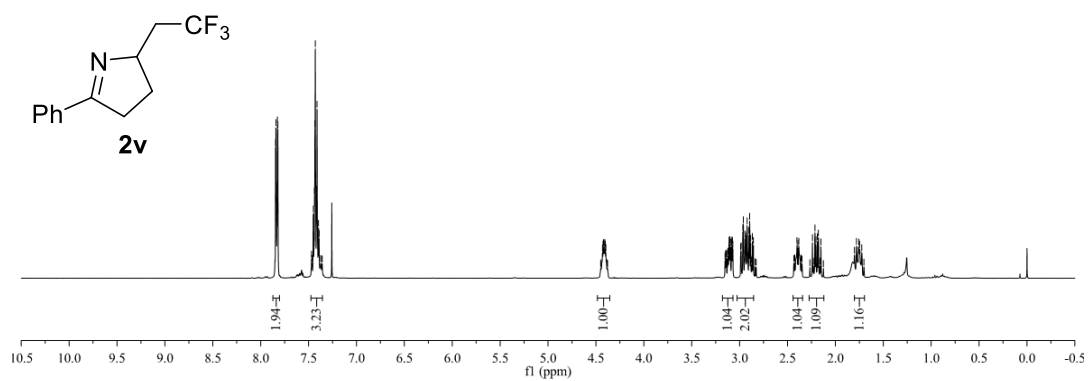

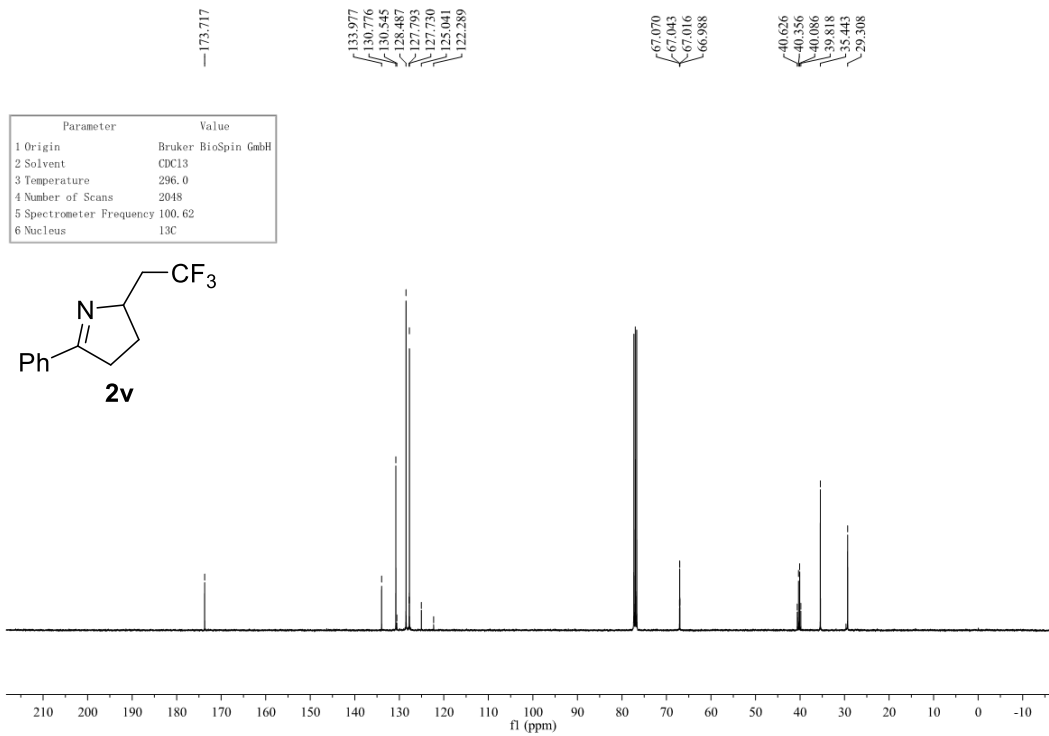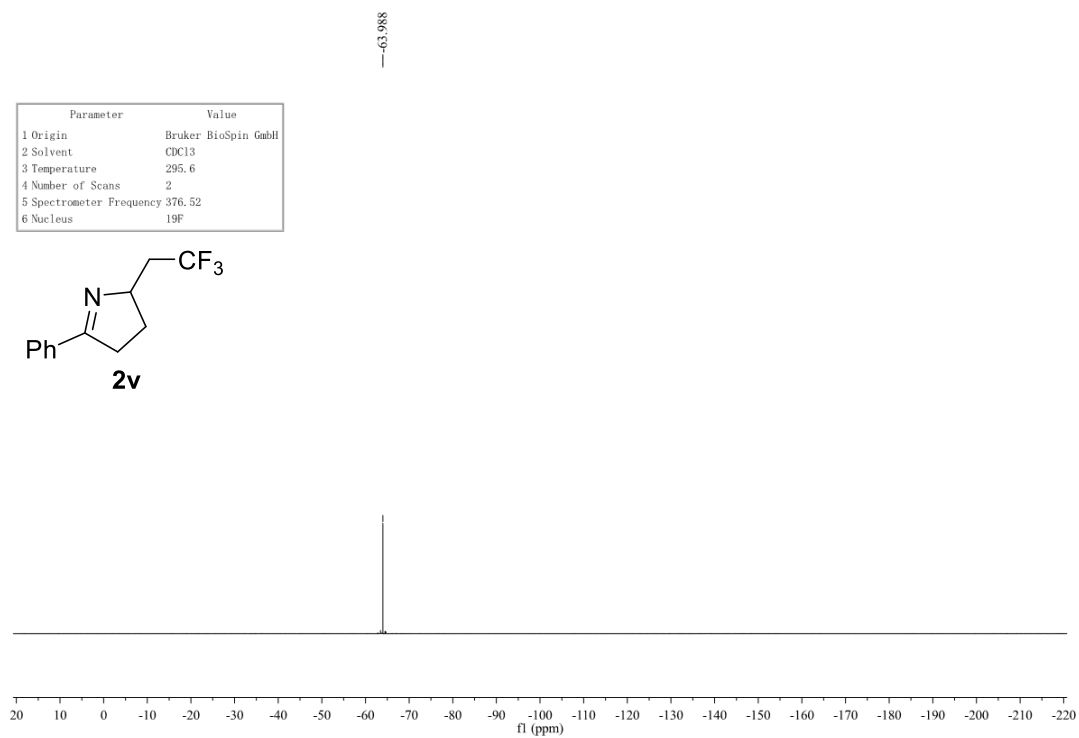

| Parameter                | Value               |
|--------------------------|---------------------|
| 1 Origin                 | Bruker BioSpin GmbH |
| 2 Solvent                | CDCl3               |
| 3 Temperature            | 301.0               |
| 4 Number of Scans        | 4                   |
| 5 Spectrometer Frequency | 400.13              |
| 6 Nucleus                | <sup>1</sup> H      |

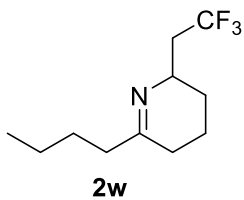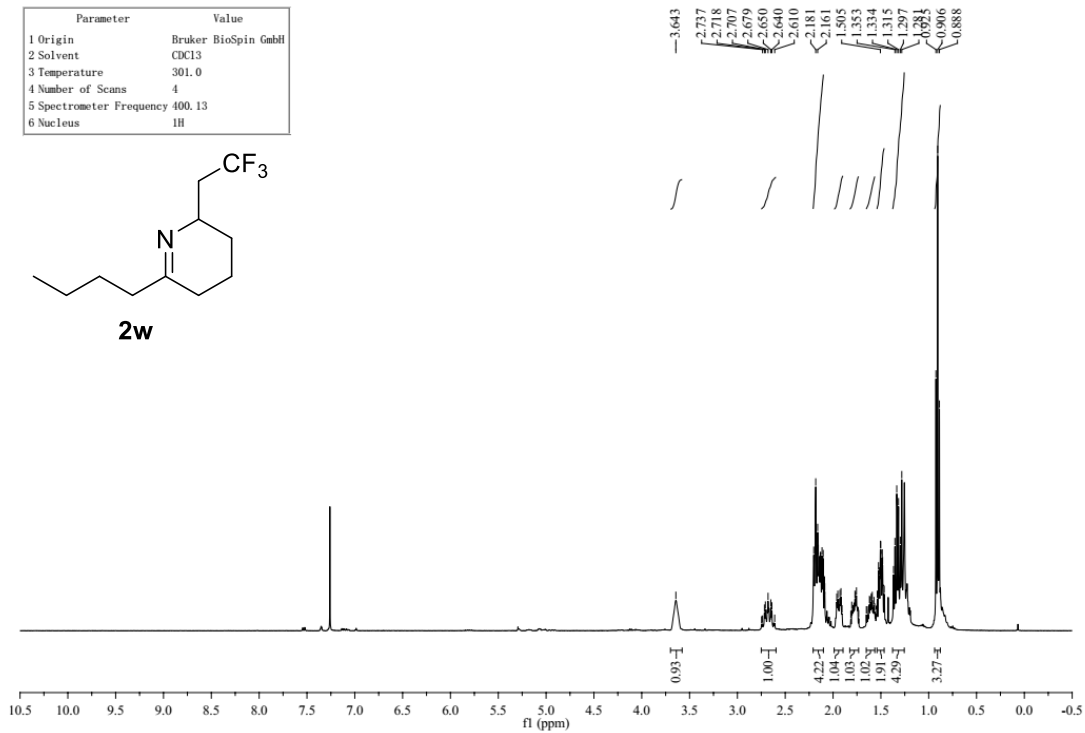

| Parameter                | Value               |
|--------------------------|---------------------|
| 1 Origin                 | Bruker BioSpin GmbH |
| 2 Solvent                | CDCl3               |
| 3 Temperature            | 298.2               |
| 4 Number of Scans        | 80                  |
| 5 Spectrometer Frequency | 100.61              |
| 6 Nucleus                | <sup>13</sup> C     |

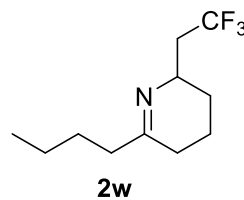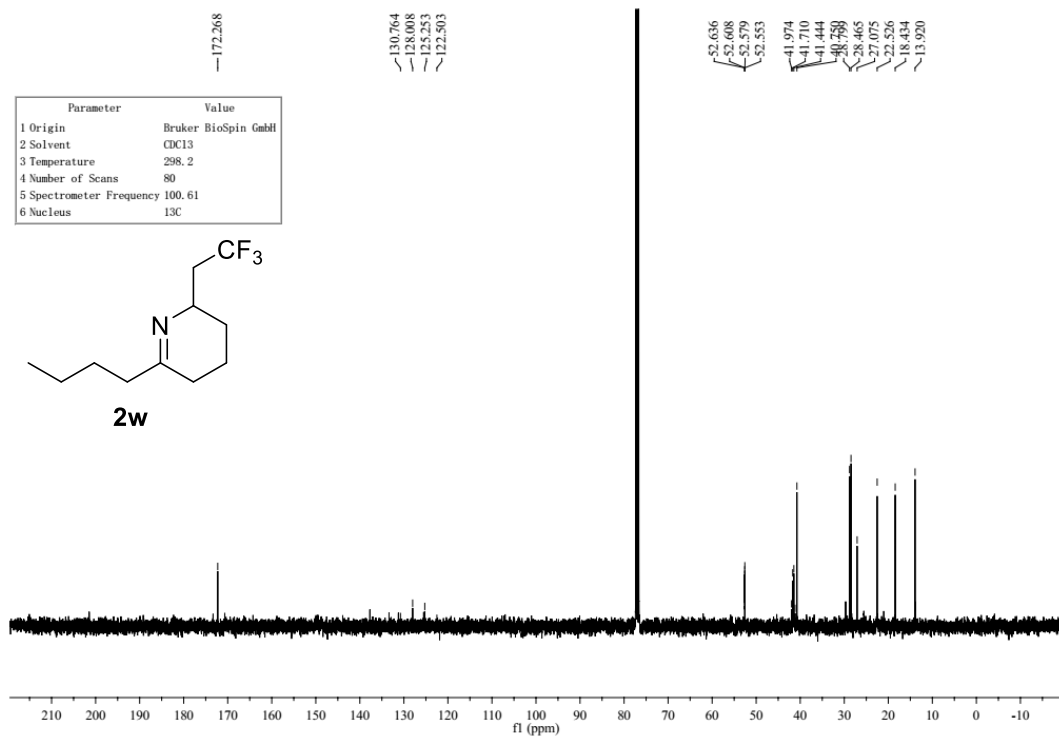

| Parameter                | Value               |
|--------------------------|---------------------|
| 1 Origin                 | Bruker BioSpin GmbH |
| 2 Solvent                | CDCl3               |
| 3 Temperature            | 301.1               |
| 4 Number of Scans        | 16                  |
| 5 Spectrometer Frequency | 376.50              |
| 6 Nucleus                | 19F                 |

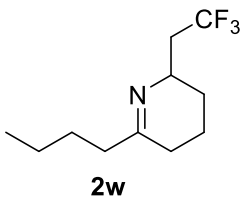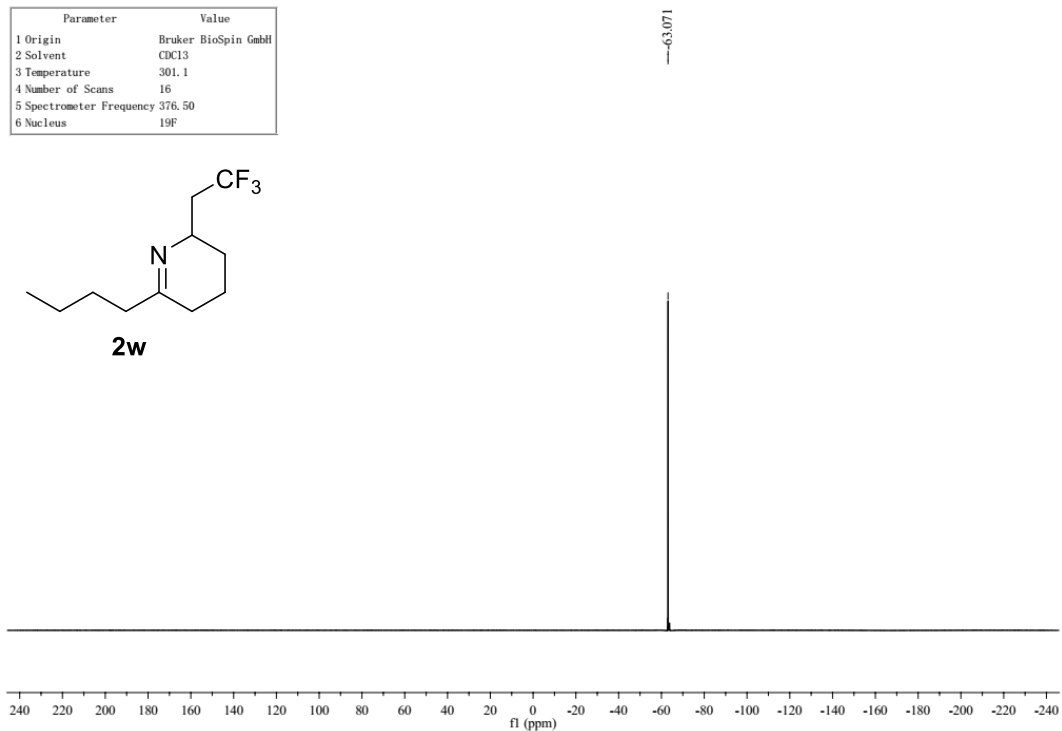

7.290  
7.286  
7.271  
7.256  
7.253  
7.201  
7.183  
7.181  
7.164  
7.161  
3.667  
3.656  
3.651  
3.646  
3.634  
3.631  
3.627  
3.623  
3.620  
3.613  
3.594  
3.583  
3.487  
3.484  
3.473  
3.468  
3.464  
3.446  
2.146  
2.135  
2.123  
2.118  
2.113  
2.108  
2.096  
2.086  
2.081  
2.073  
2.067  
2.058  
2.050  
2.043  
2.033  
2.027  
1.940  
1.929  
1.918  
1.907  
1.896  
1.877  
1.776  
1.750  
1.598  
1.581  
1.578  
1.569  
1.256  
1.248  
1.239  
1.224  
1.215  
1.209  
1.191  
1.185

| Parameter                | Value               |
|--------------------------|---------------------|
| 1 Origin                 | Bruker BioSpin GmbH |
| 2 Solvent                | CDCl3               |
| 3 Temperature            | 297.0               |
| 4 Number of Scans        | 2                   |
| 5 Spectrometer Frequency | 400.15              |
| 6 Nucleus                | 1H                  |

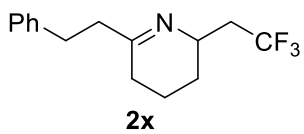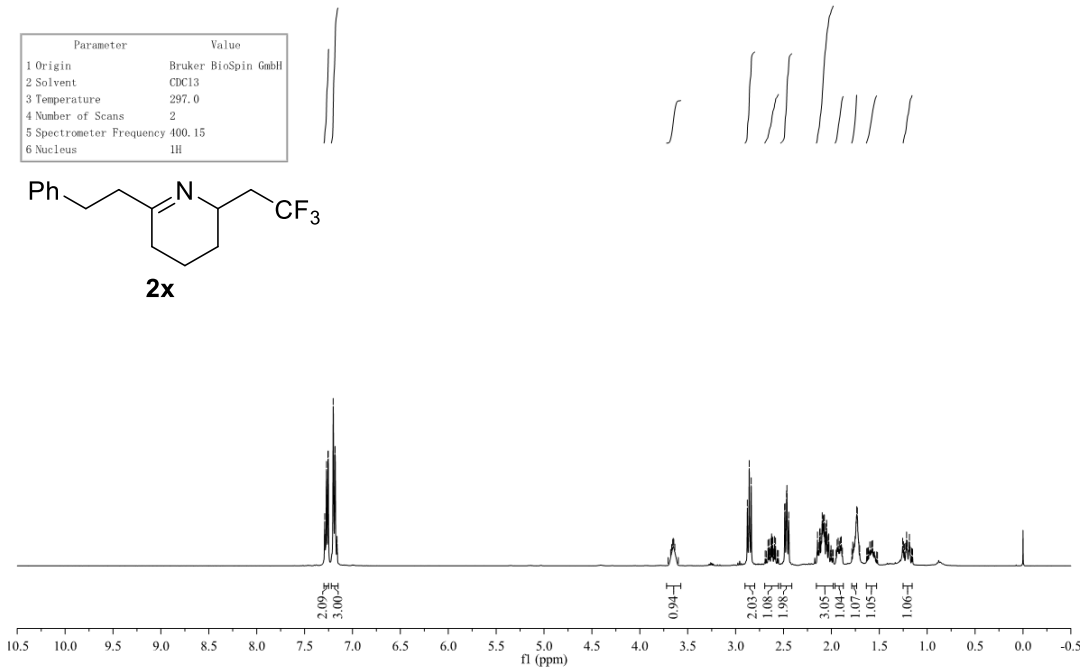

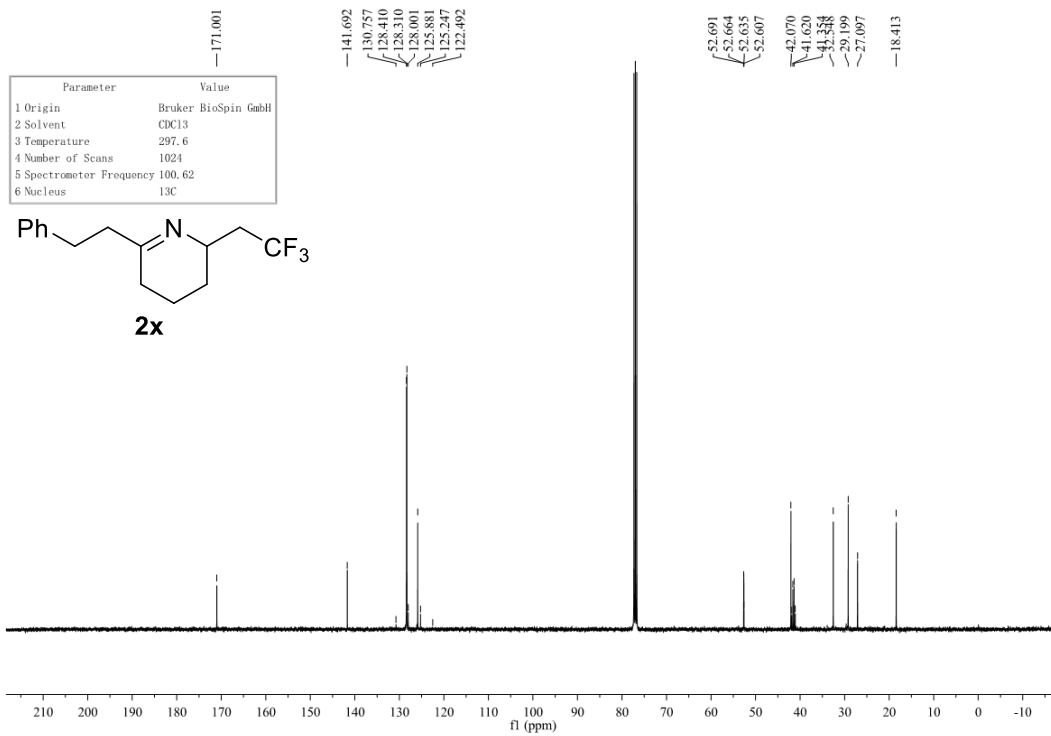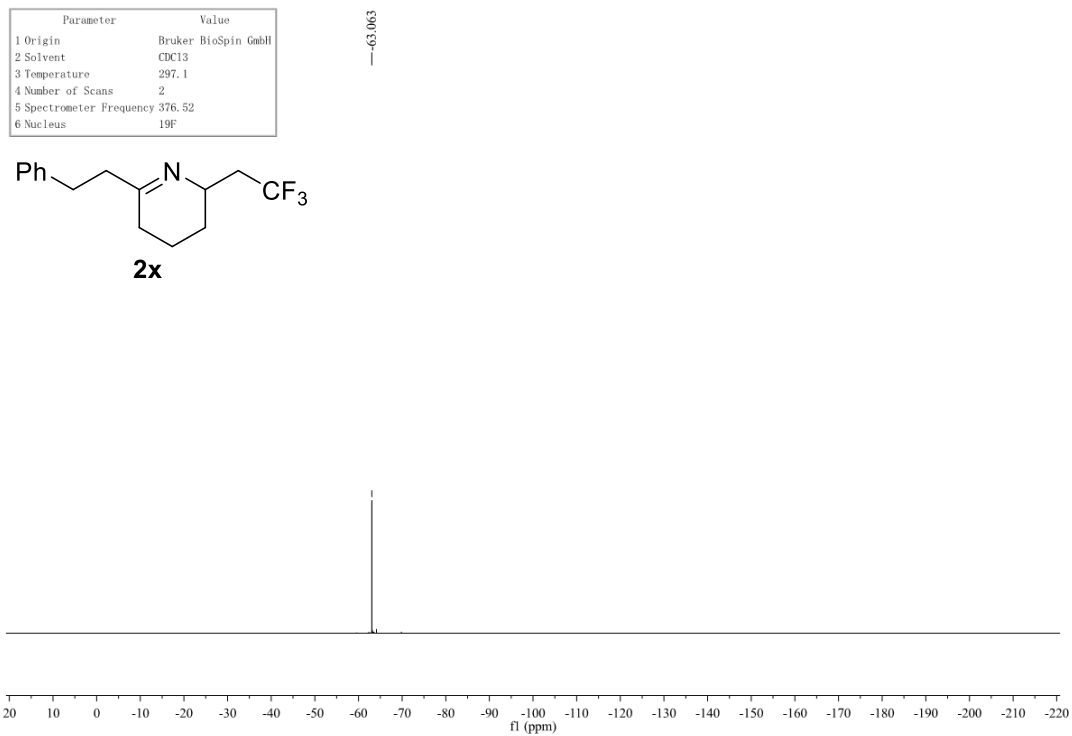

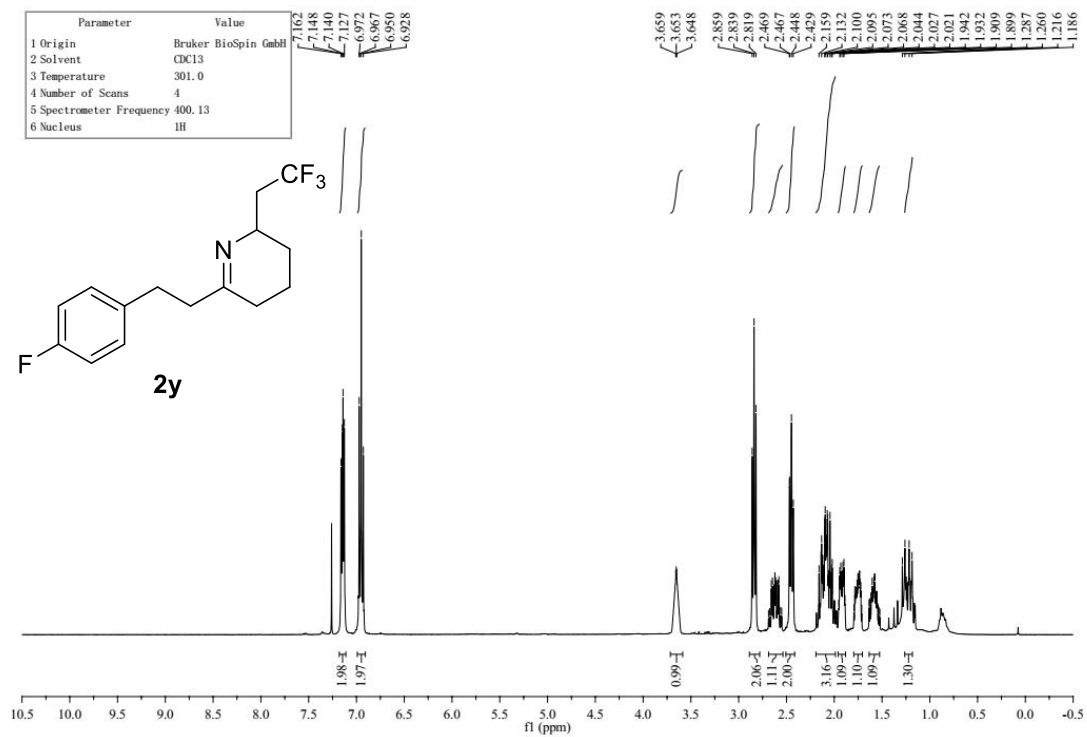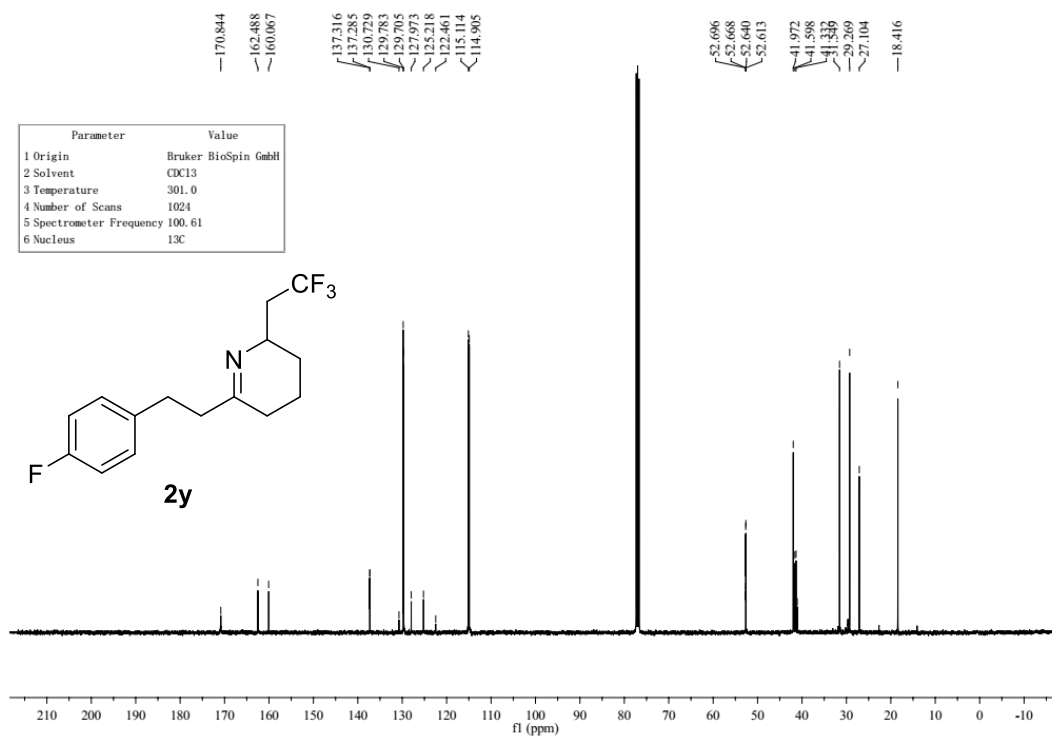

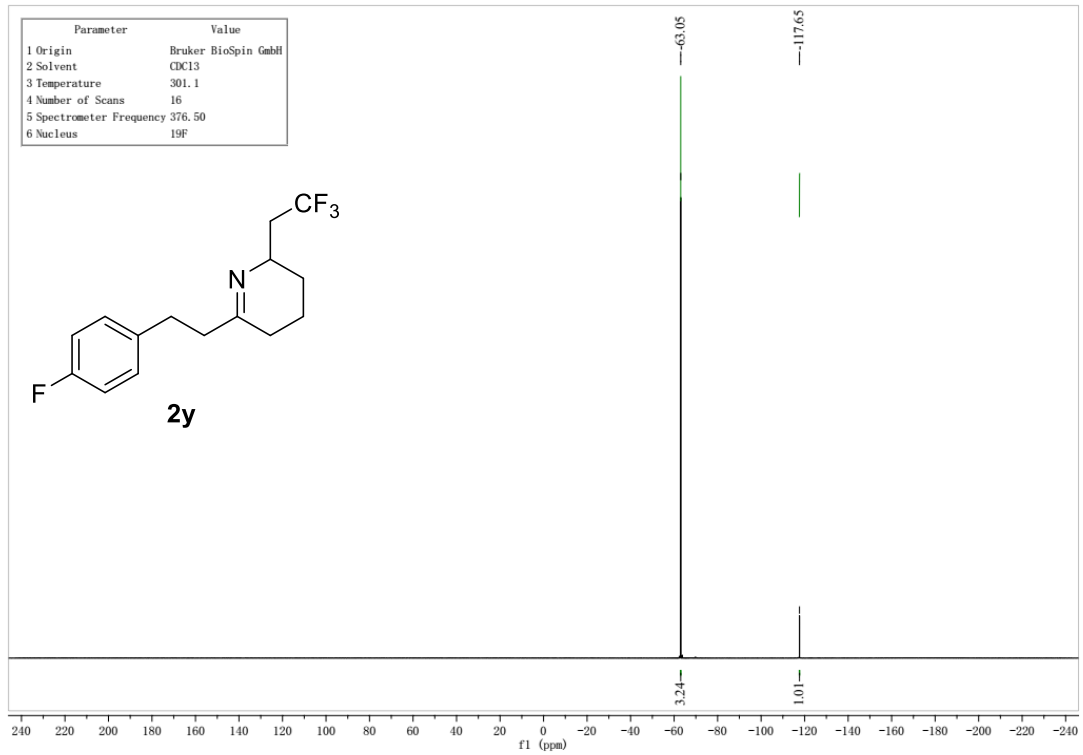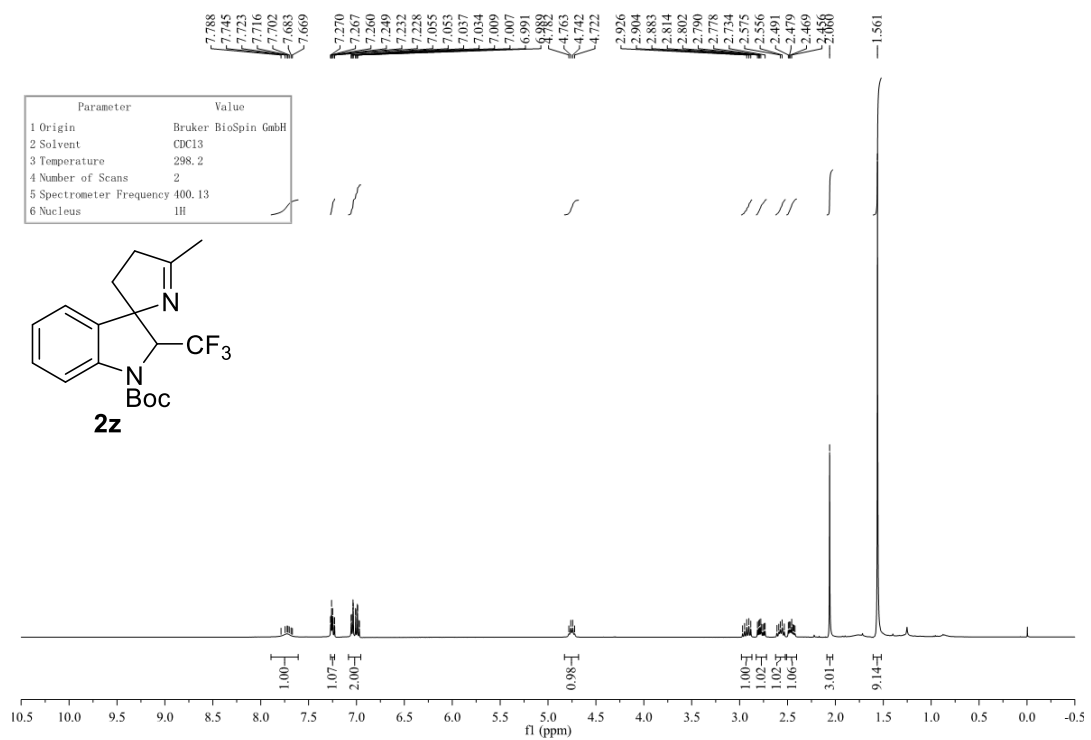

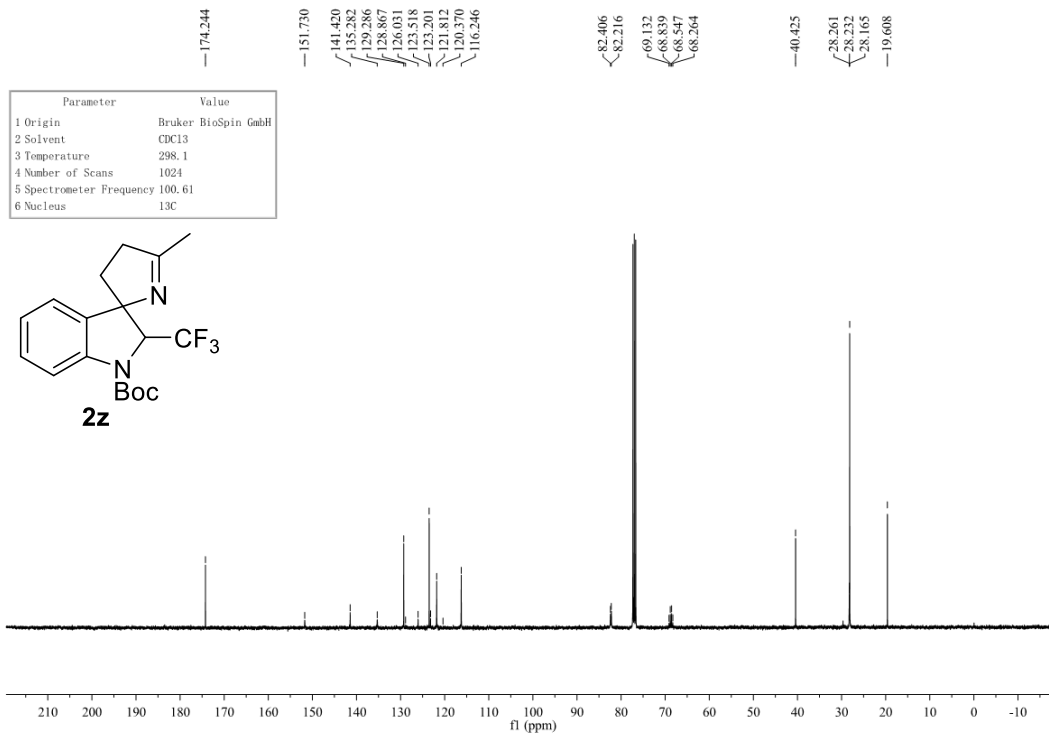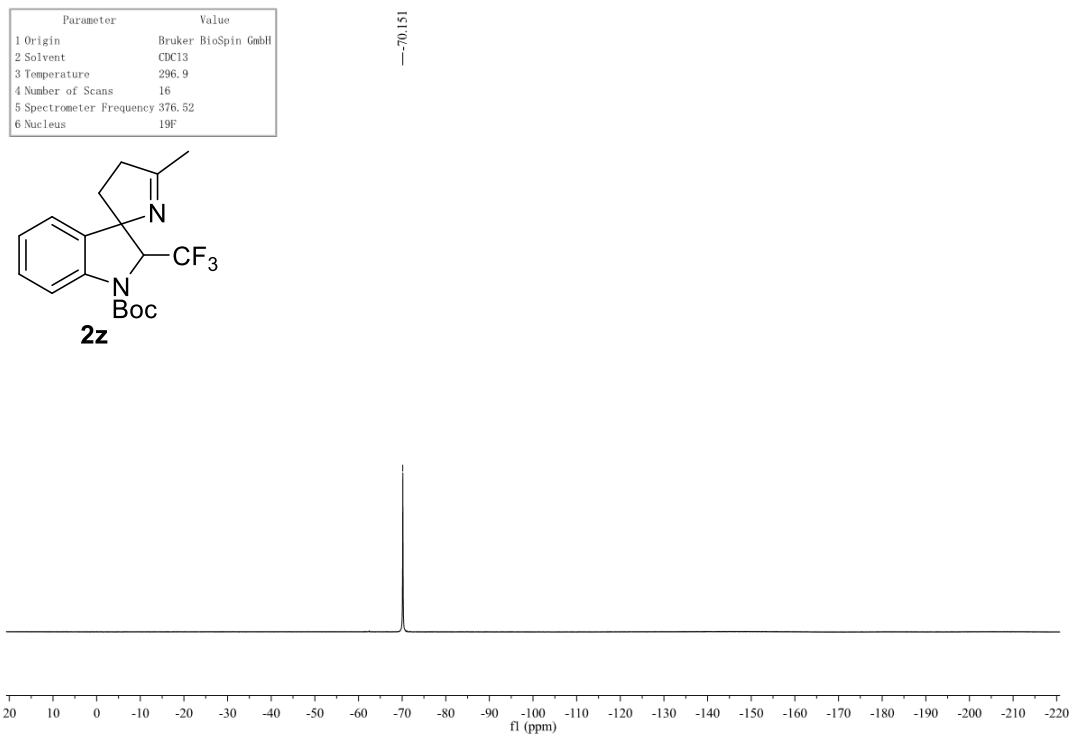



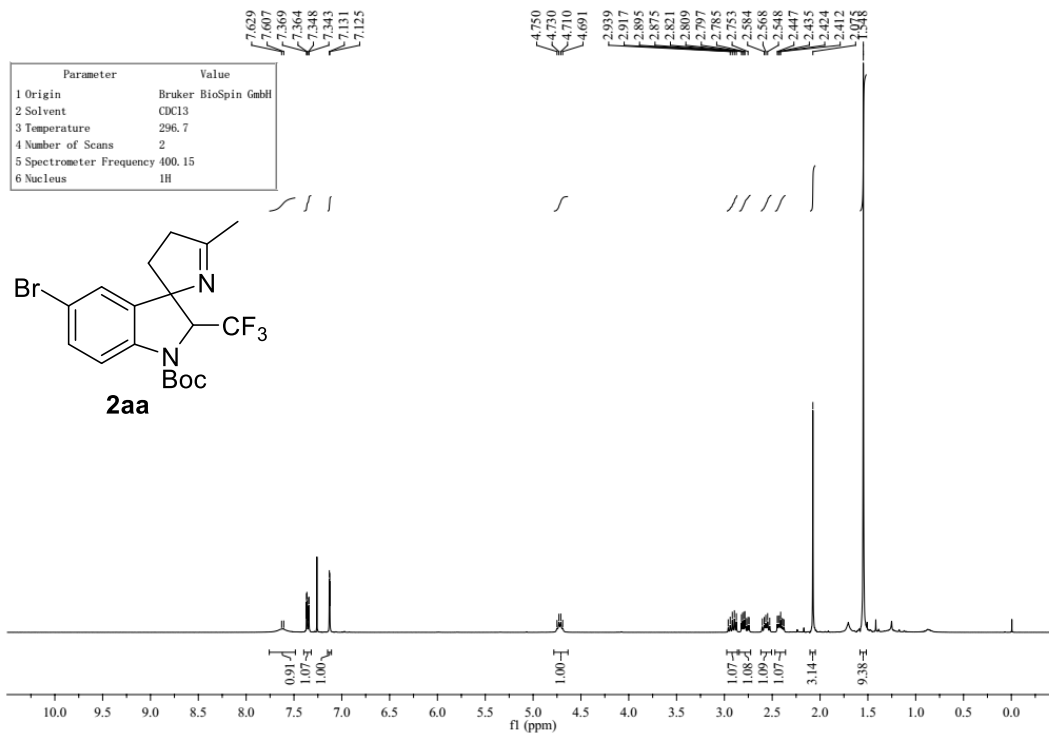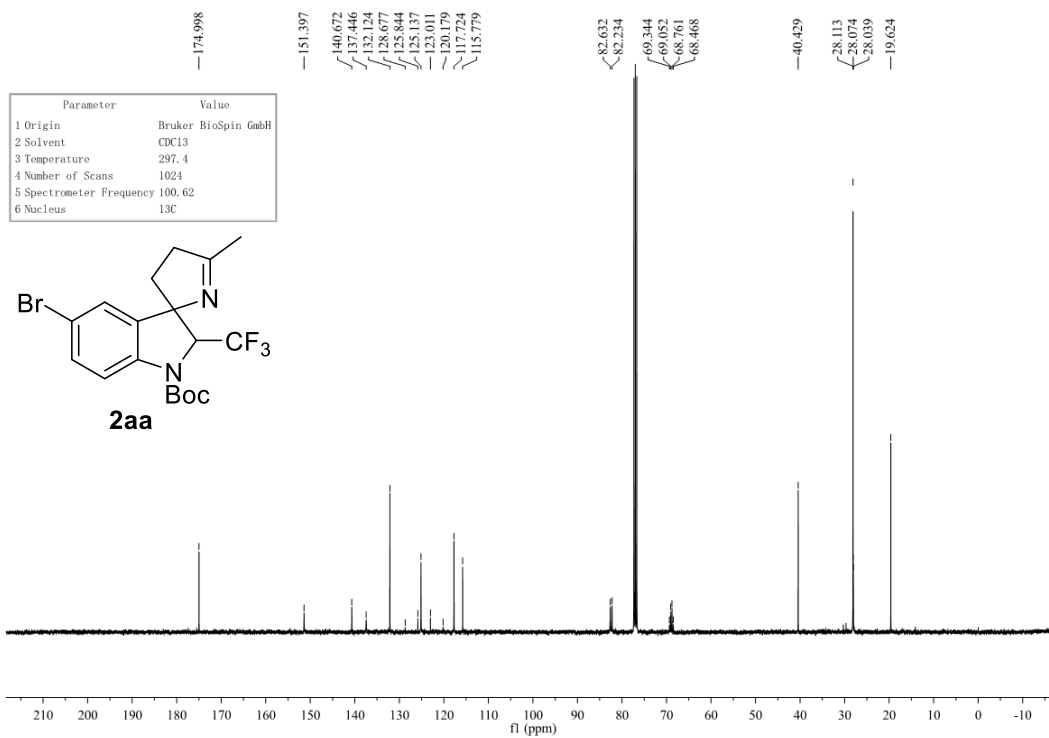

| Parameter                | Value               |
|--------------------------|---------------------|
| 1 Origin                 | Bruker BioSpin GmbH |
| 2 Solvent                | CDCl3               |
| 3 Temperature            | 297.9               |
| 4 Number of Scans        | 2                   |
| 5 Spectrometer Frequency | 376.52              |
| 6 Nucleus                | 19F                 |

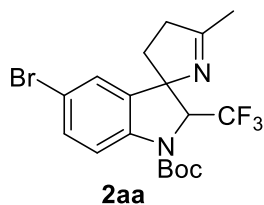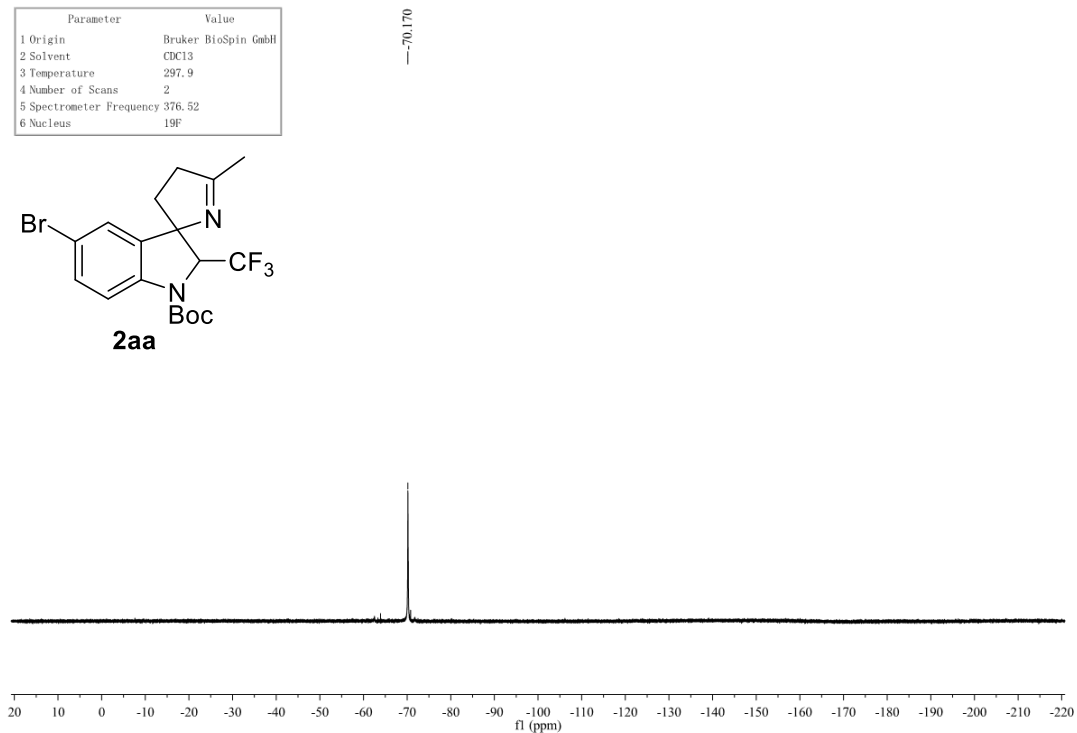

| Parameter                | Value               |
|--------------------------|---------------------|
| 1 Origin                 | Bruker BioSpin GmbH |
| 2 Solvent                | CDCl3               |
| 3 Temperature            | 296.1               |
| 4 Number of Scans        | 2                   |
| 5 Spectrometer Frequency | 400.15              |
| 6 Nucleus                | 1H                  |

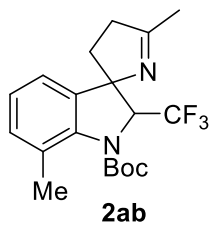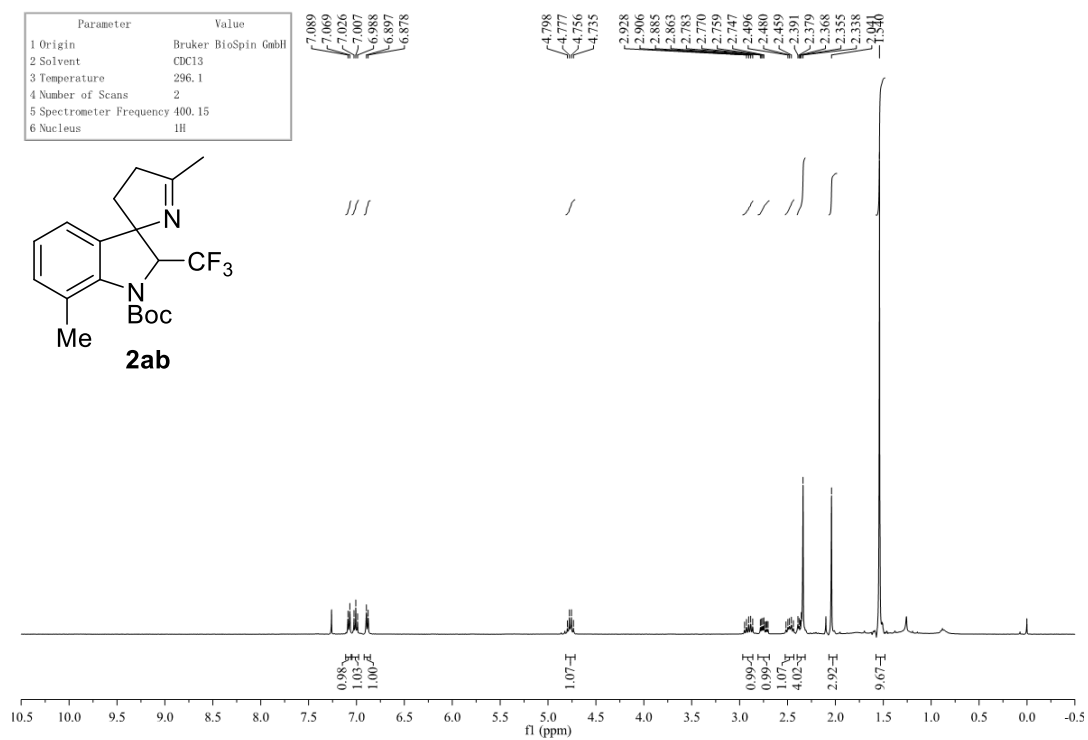

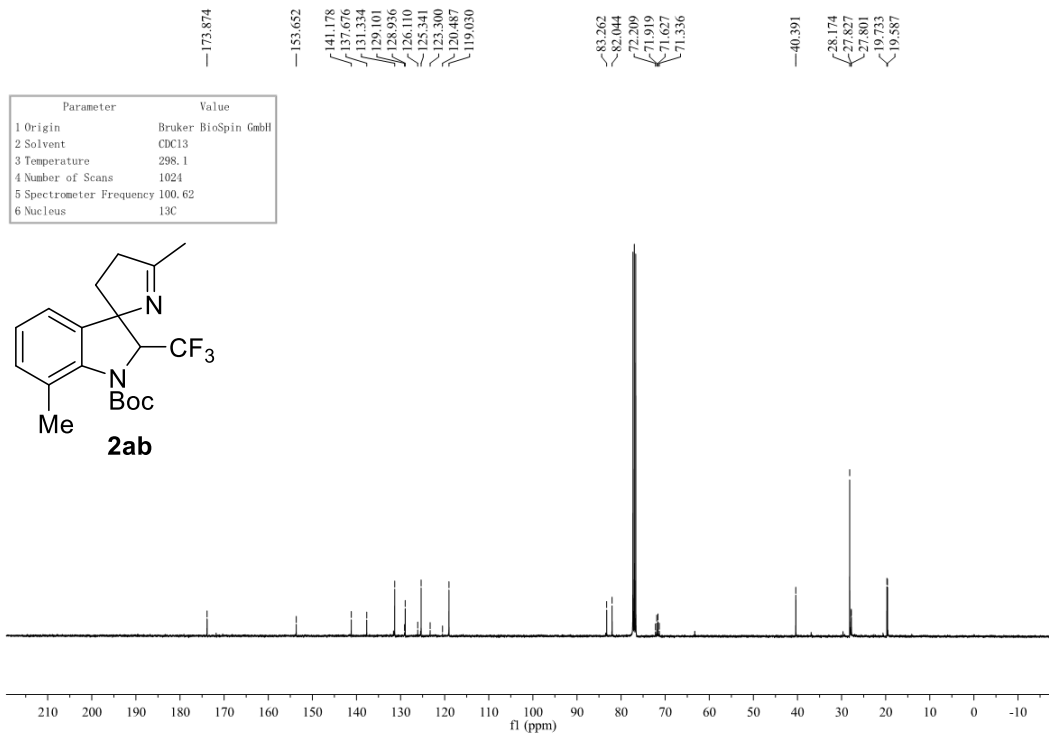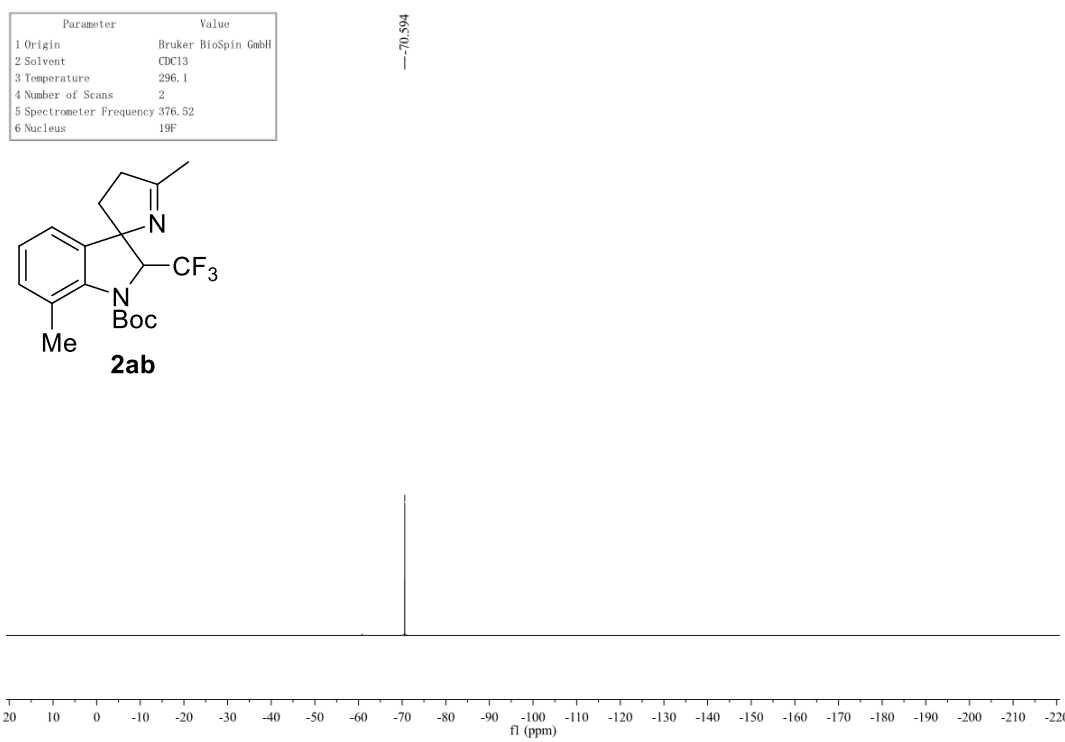

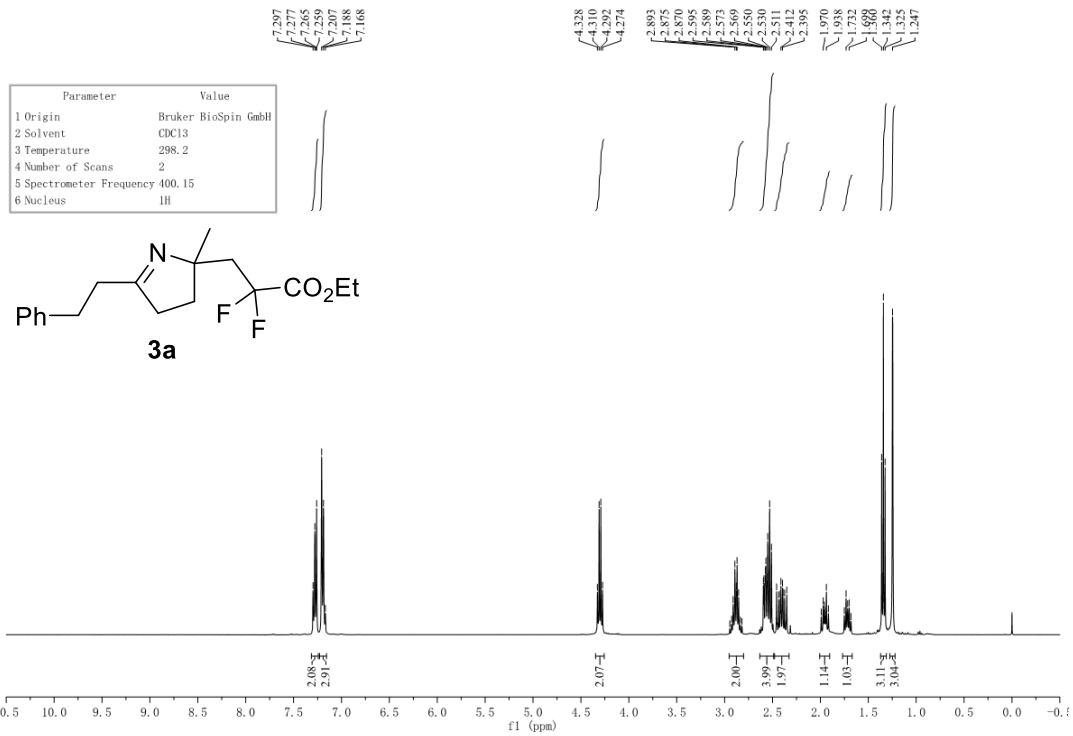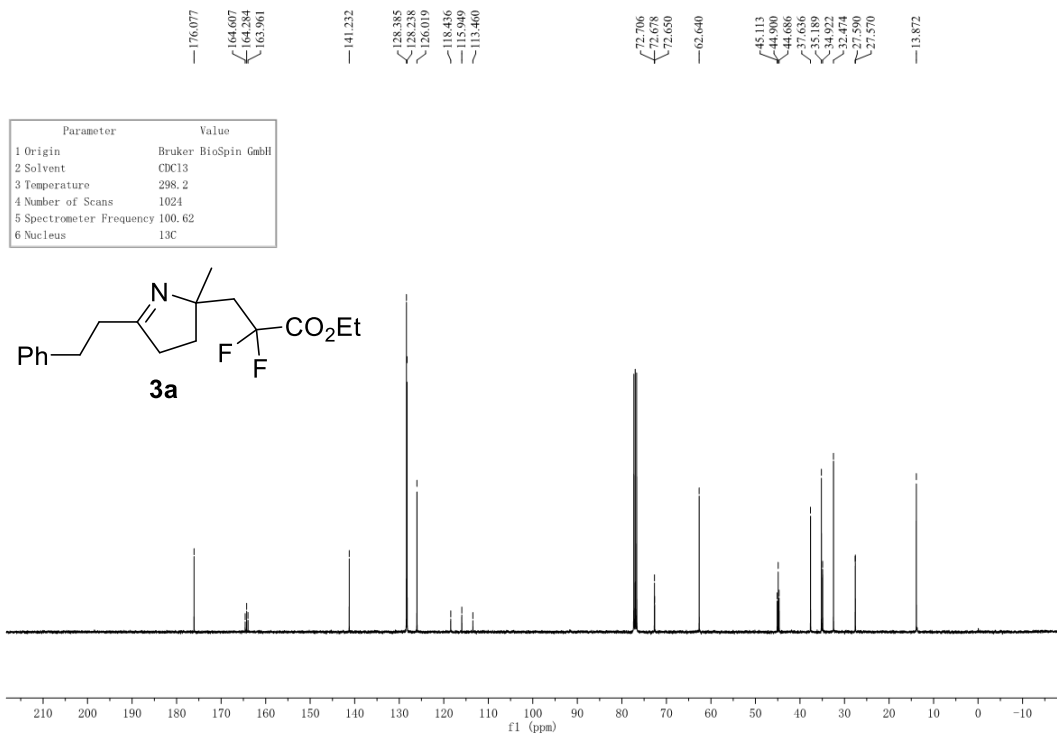

| Parameter                | Value               |
|--------------------------|---------------------|
| 1 Origin                 | Bruker BioSpin GmbH |
| 2 Solvent                | CDCl3               |
| 3 Temperature            | 298.2               |
| 4 Number of Scans        | 2                   |
| 5 Spectrometer Frequency | 376.52              |
| 6 Nucleus                | 19F                 |

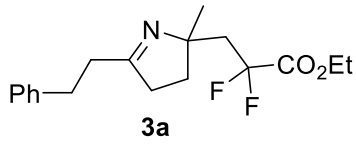

100.548  
-101.148  
-101.863  
-102.562

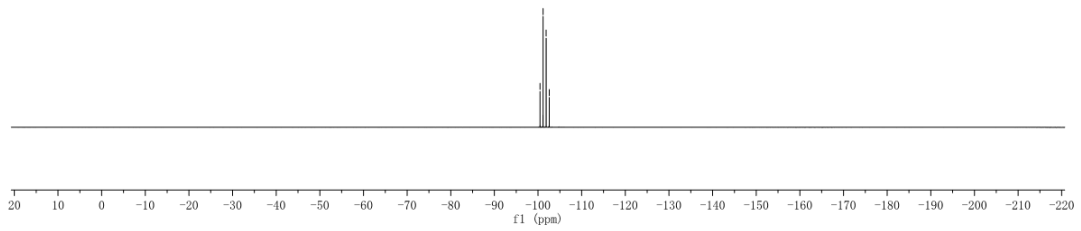

8.525  
7.605  
7.586  
7.540  
7.340  
7.330  
7.259  
7.247  
7.229  
7.211  
7.176  
7.138  
7.108  
7.048  
7.030

2.866  
2.845  
2.831  
2.811  
2.791  
2.772  
2.757  
2.737  
2.717  
2.694  
2.573  
2.556  
2.535  
2.524  
2.515  
2.504  
2.488  
2.427  
2.420  
2.382

| Parameter                | Value               |
|--------------------------|---------------------|
| 1 Origin                 | Bruker BioSpin GmbH |
| 2 Solvent                | CDCl3               |
| 3 Temperature            | 295.5               |
| 4 Number of Scans        | 2                   |
| 5 Spectrometer Frequency | 400.15              |
| 6 Nucleus                | 1H                  |

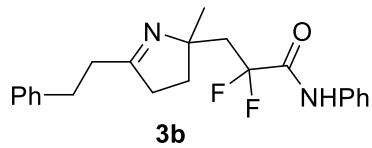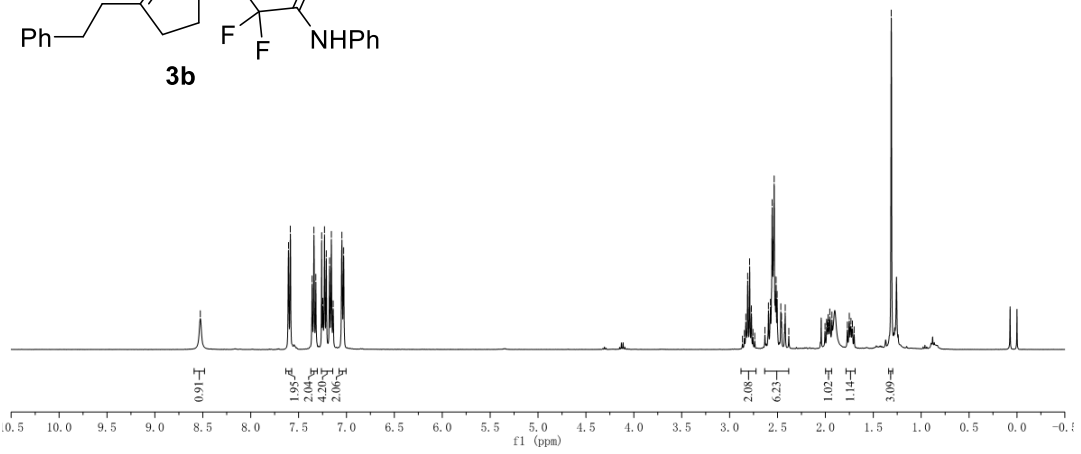

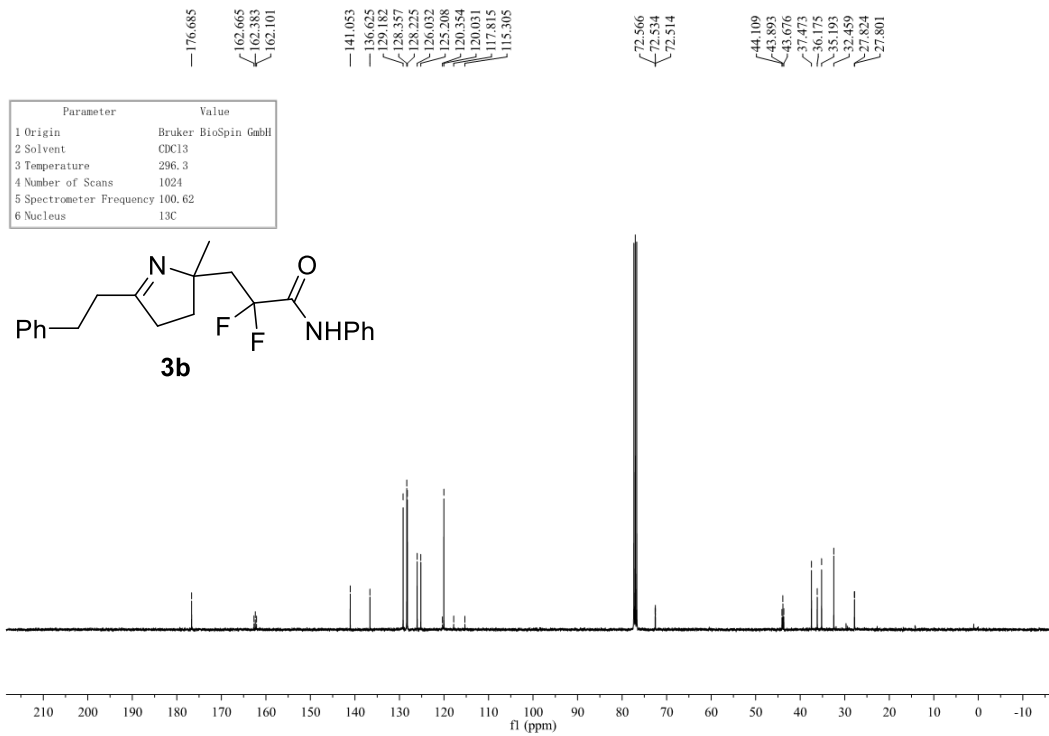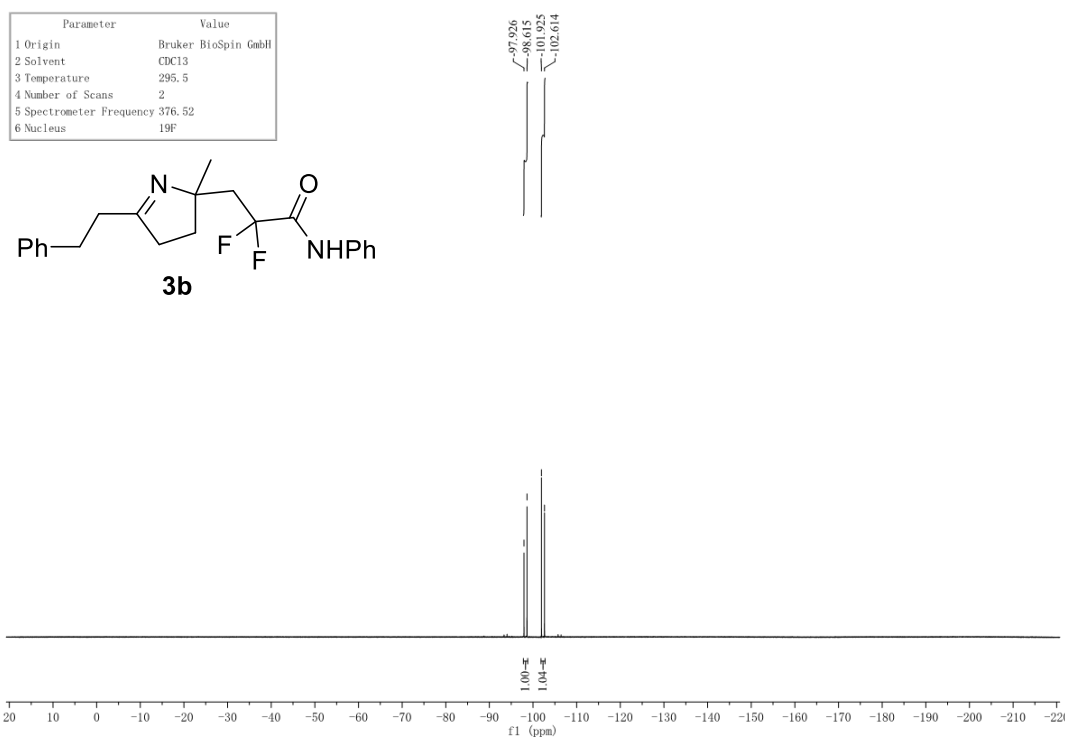

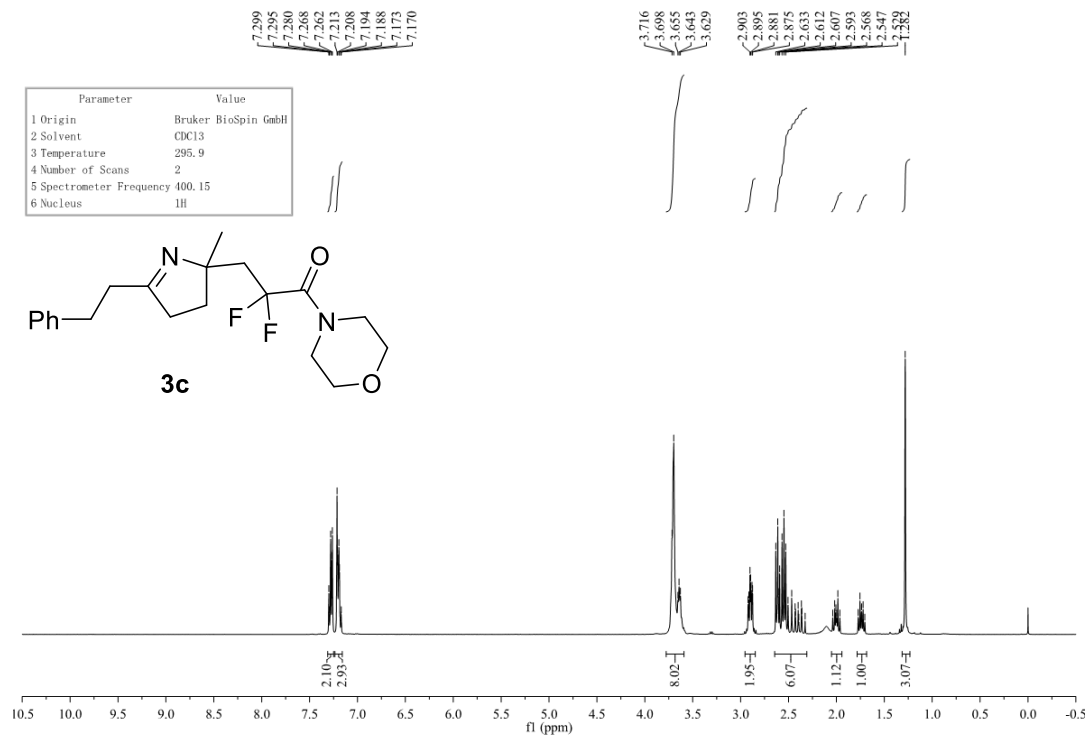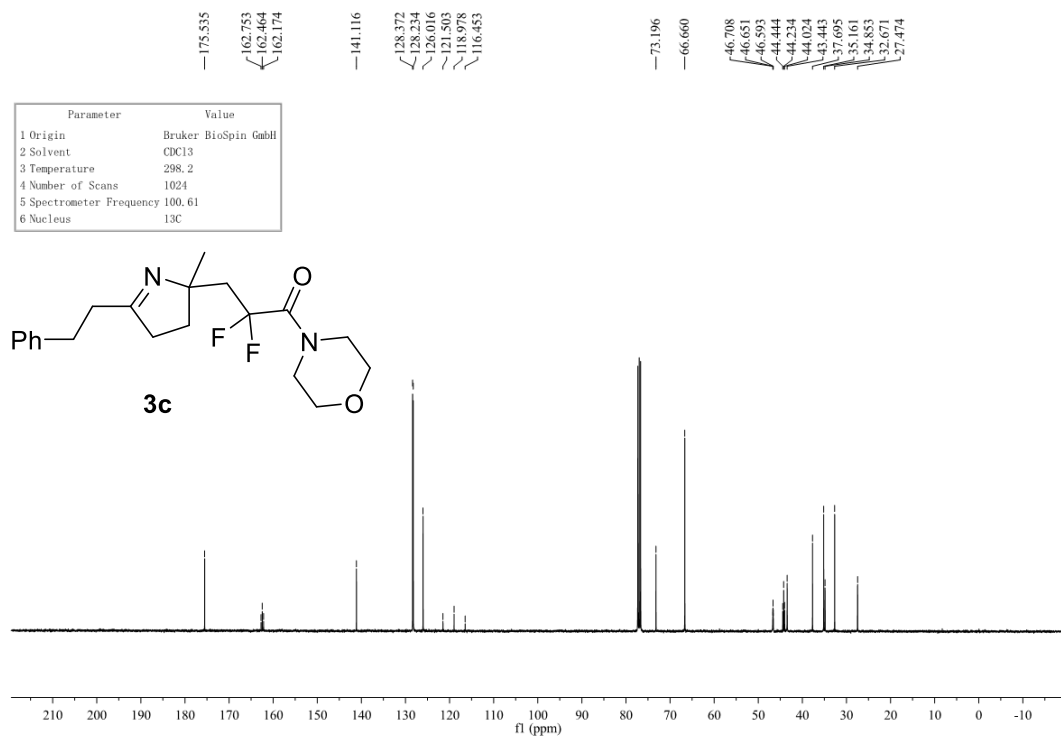

| Parameter                | Value               |
|--------------------------|---------------------|
| 1 Origin                 | Bruker BioSpin GmbH |
| 2 Solvent                | CDCl3               |
| 3 Temperature            | 296.0               |
| 4 Number of Scans        | 2                   |
| 5 Spectrometer Frequency | 376.52              |
| 6 Nucleus                | 19F                 |

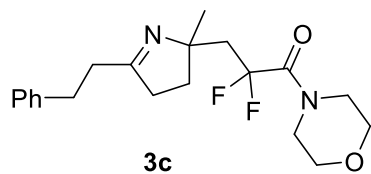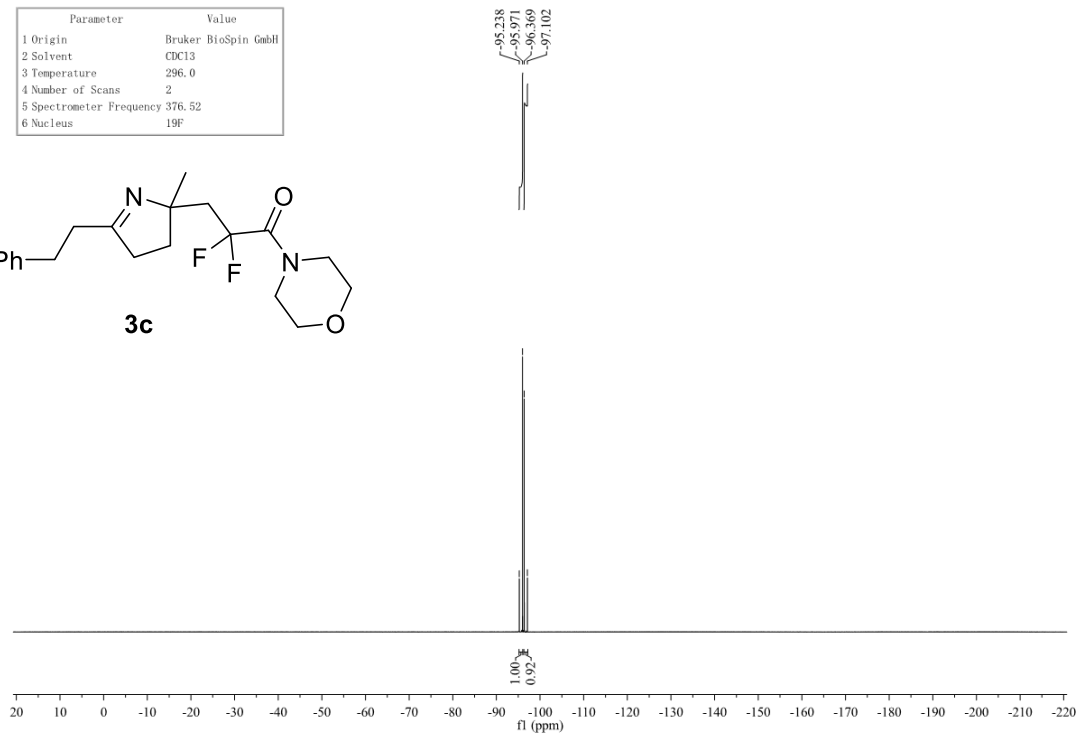

| Parameter                | Value               |
|--------------------------|---------------------|
| 1 Origin                 | Bruker BioSpin GmbH |
| 2 Solvent                | CDCl3               |
| 3 Temperature            | 298.2               |
| 4 Number of Scans        | 2                   |
| 5 Spectrometer Frequency | 400.15              |
| 6 Nucleus                | 1H                  |

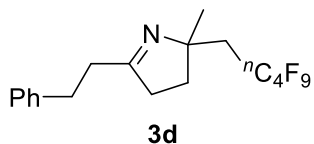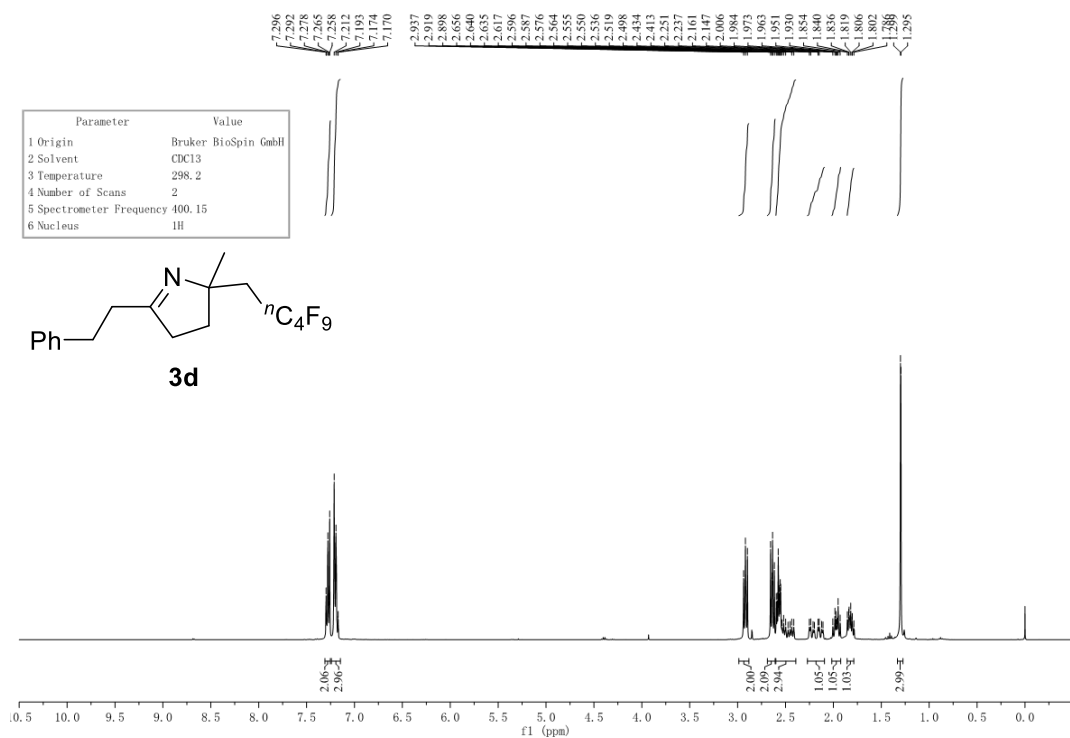



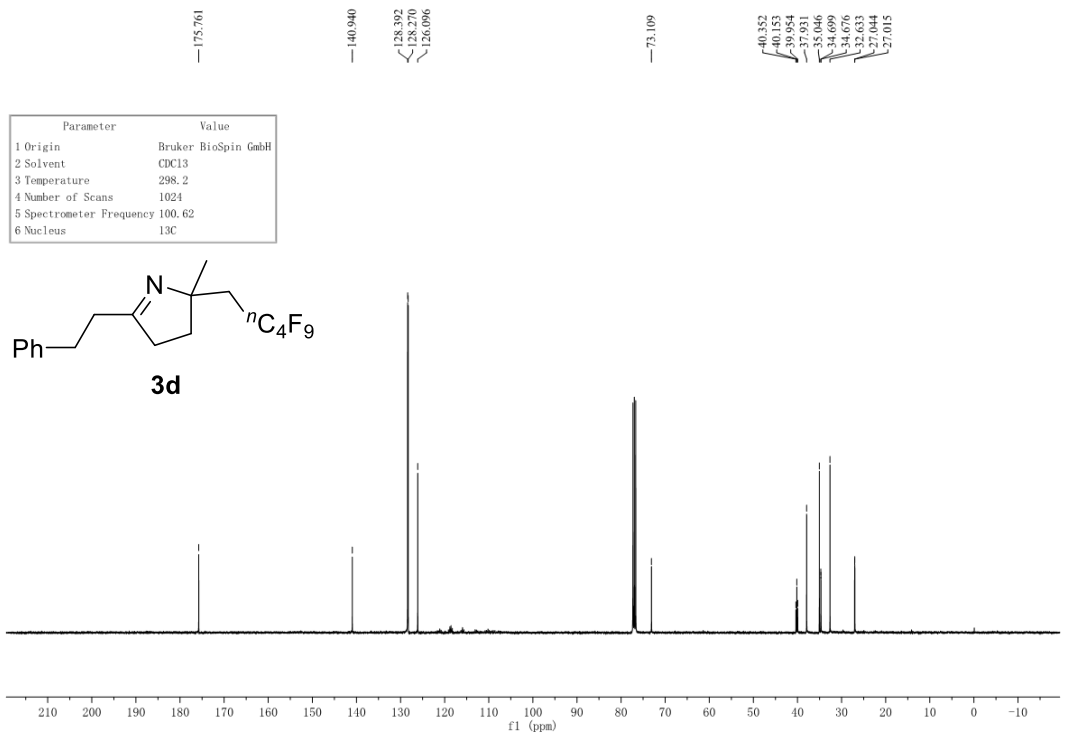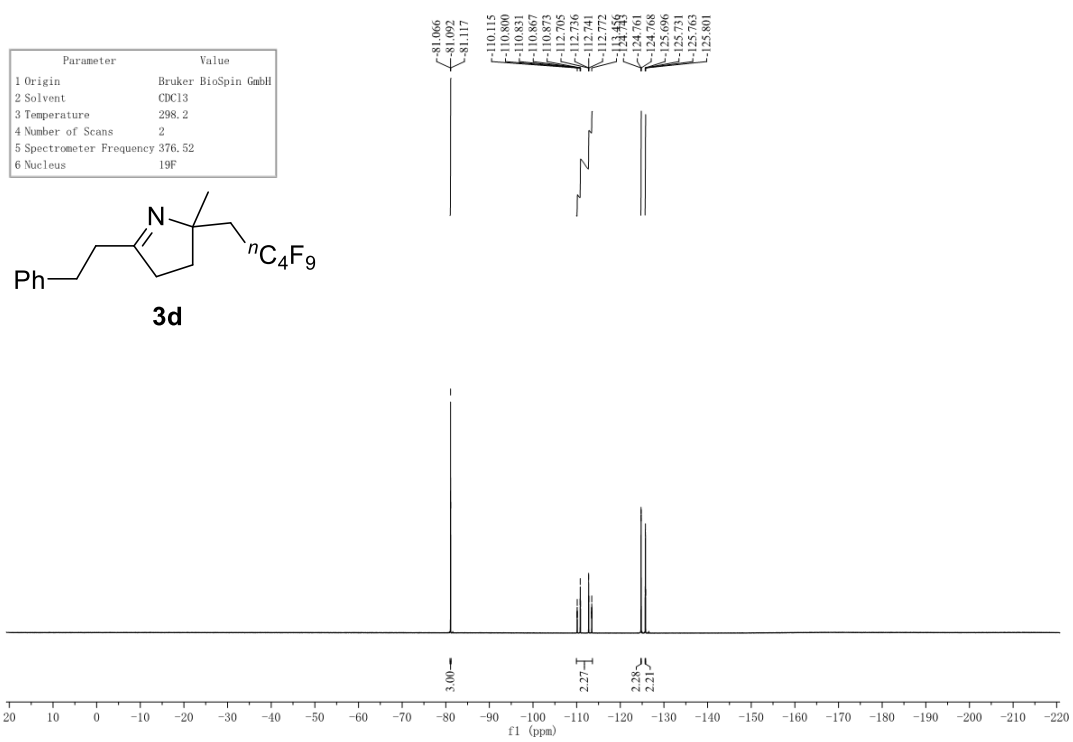

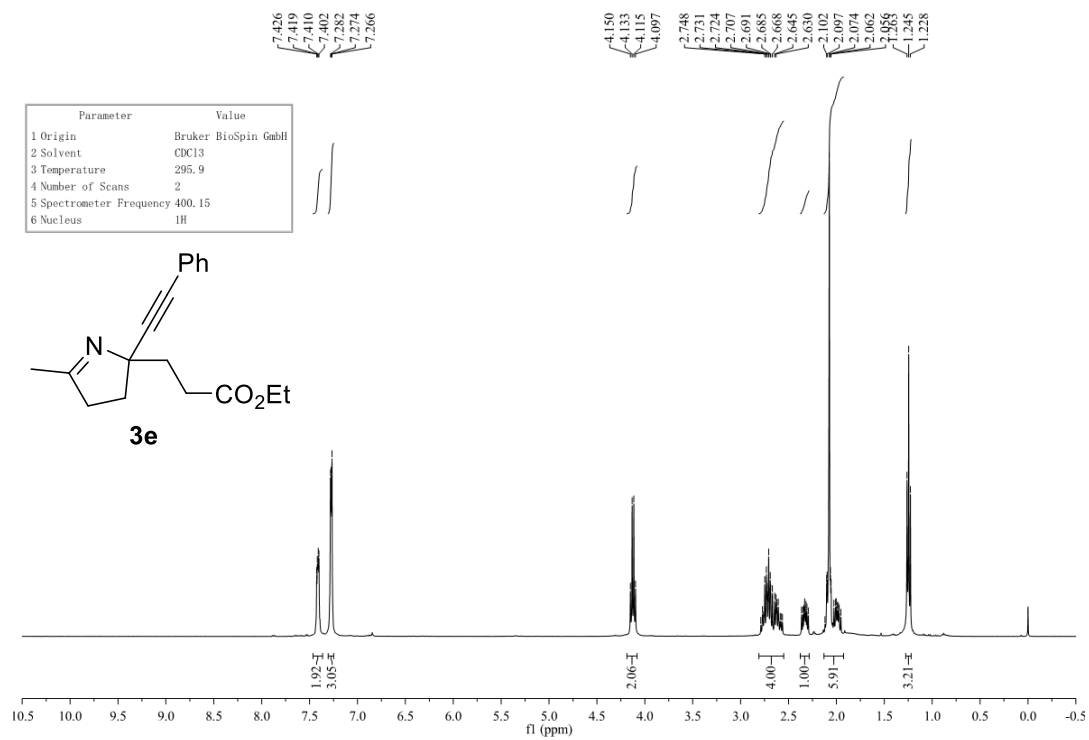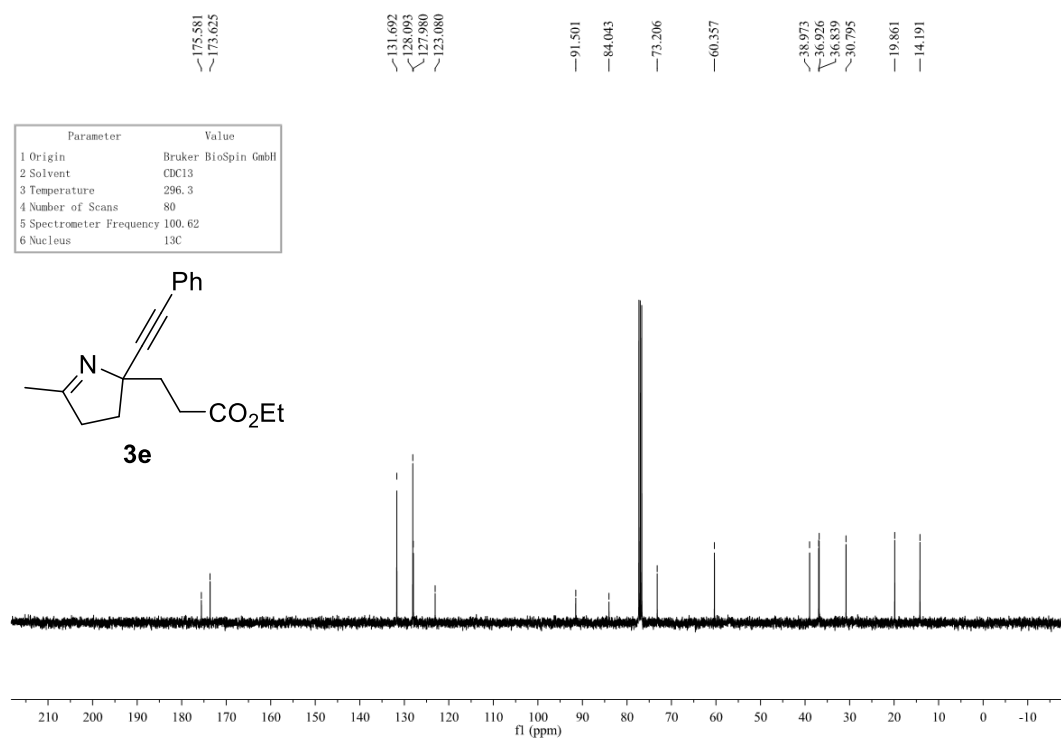

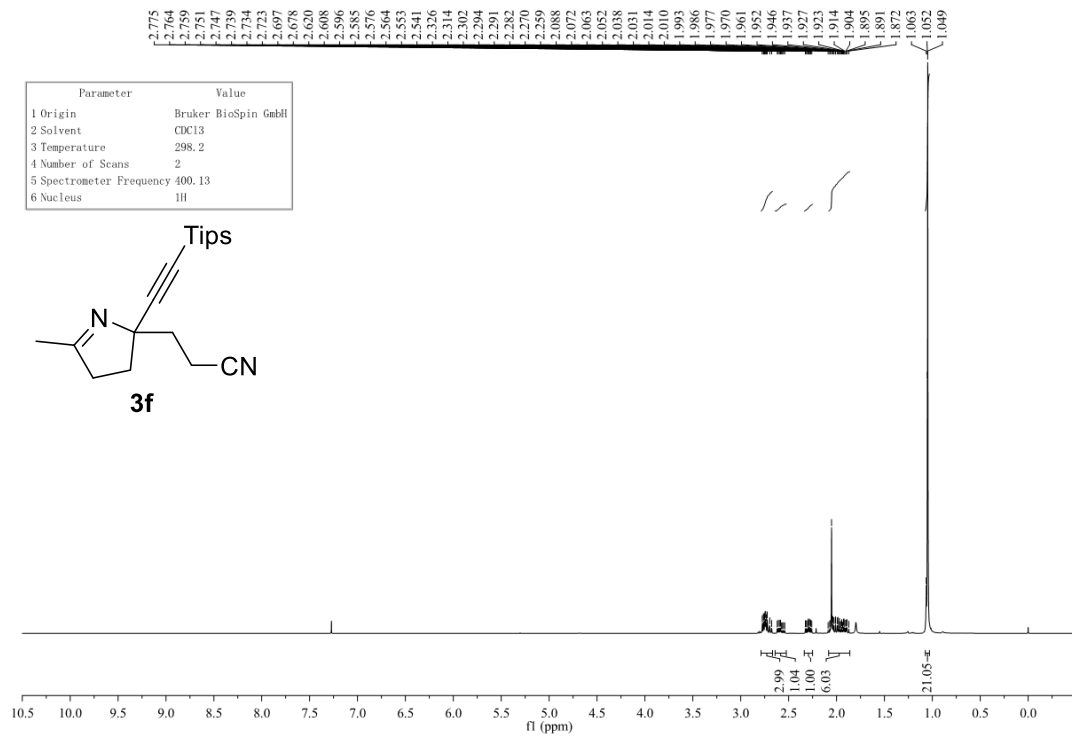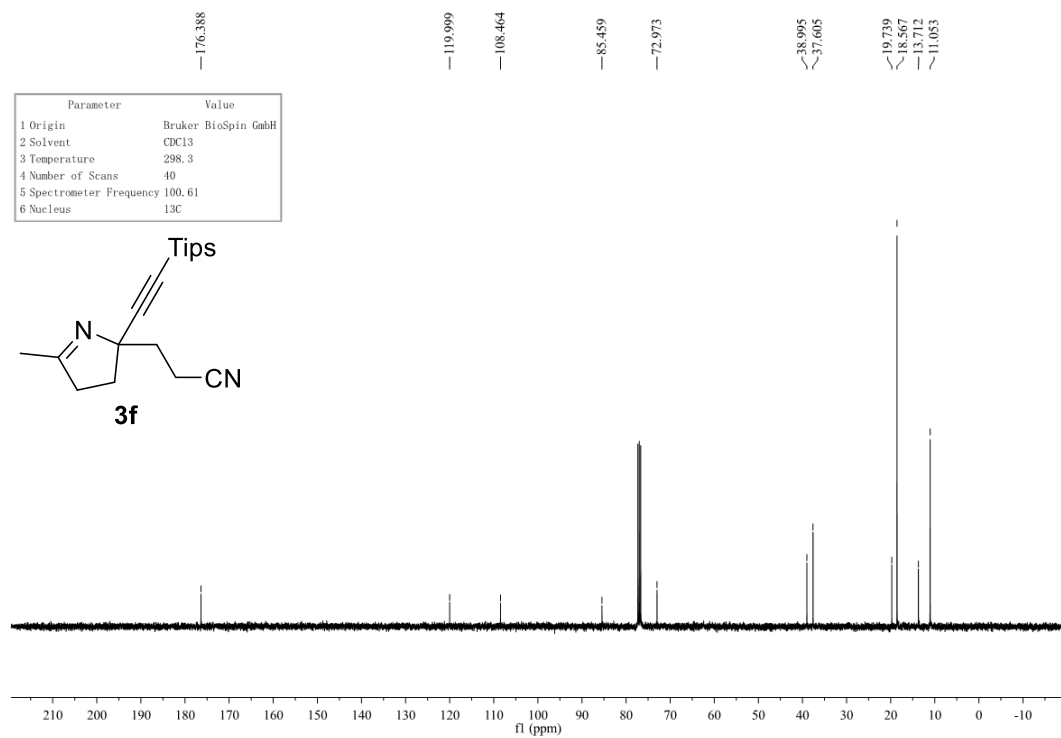

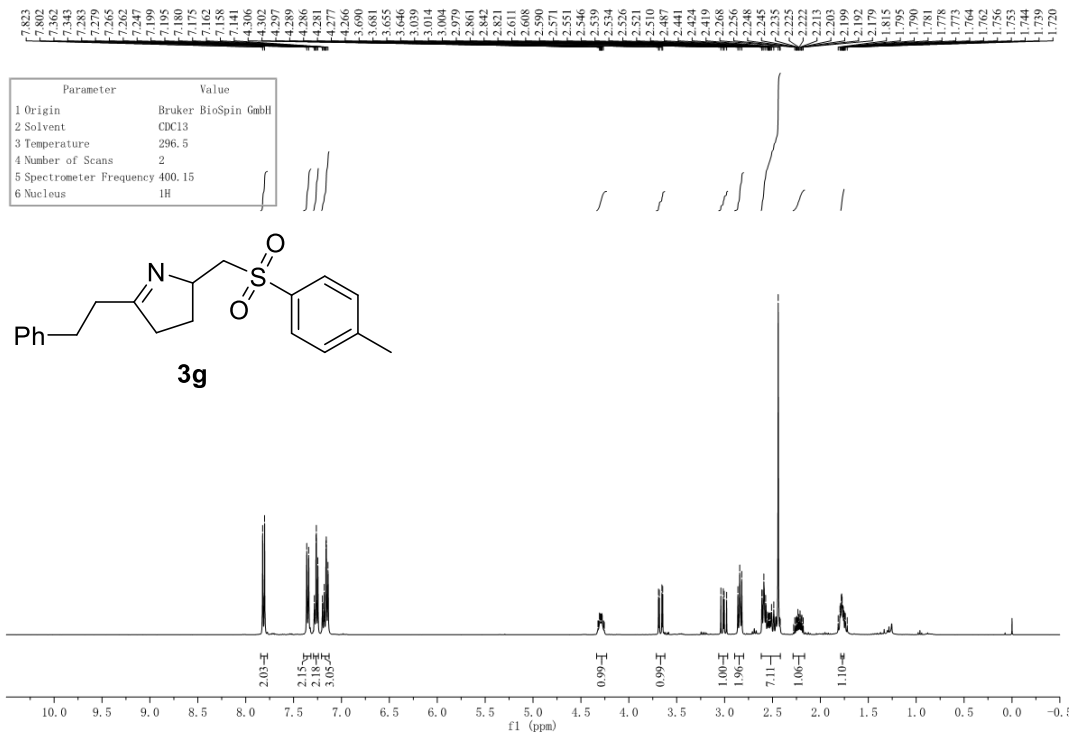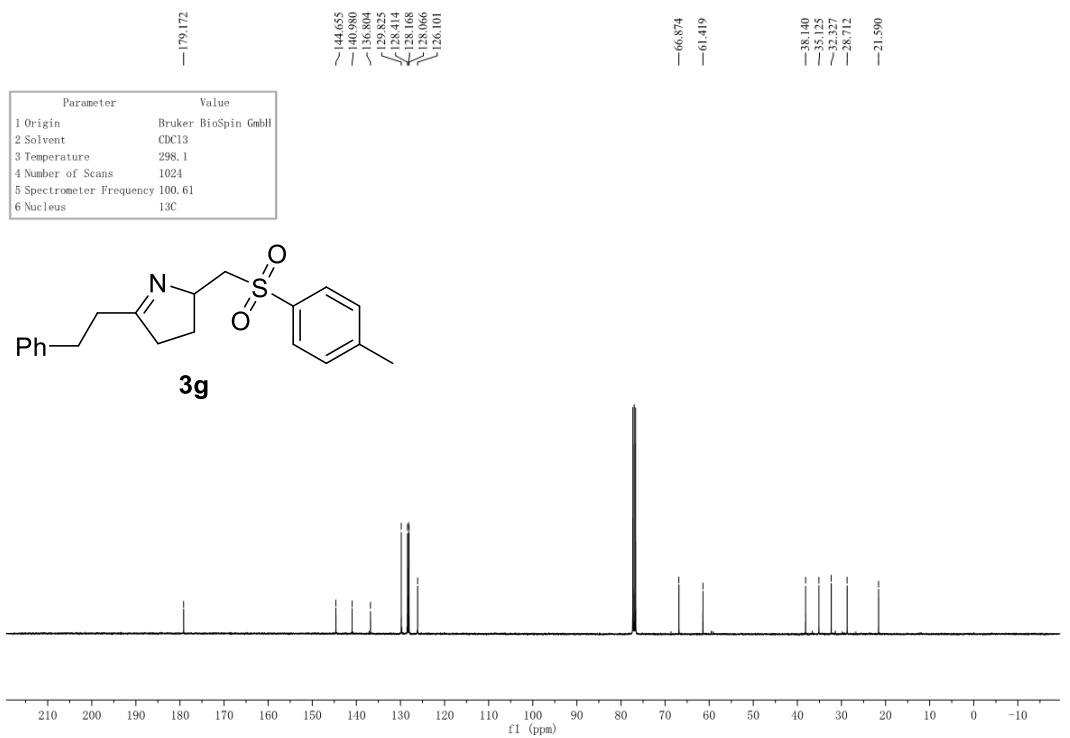

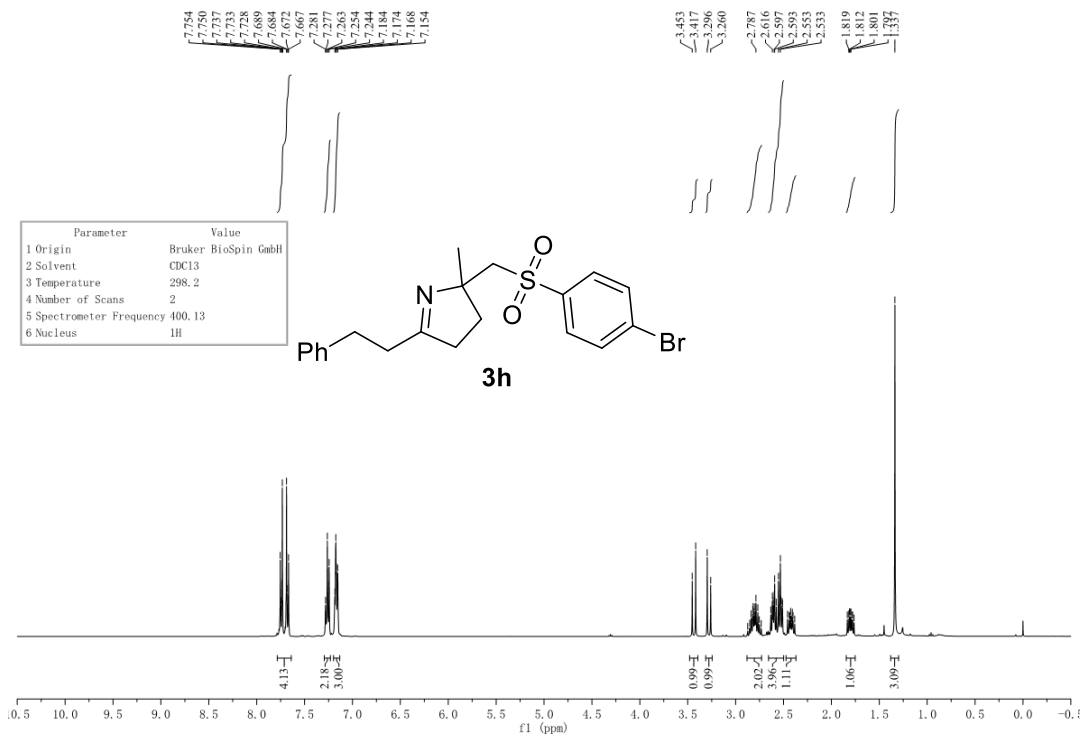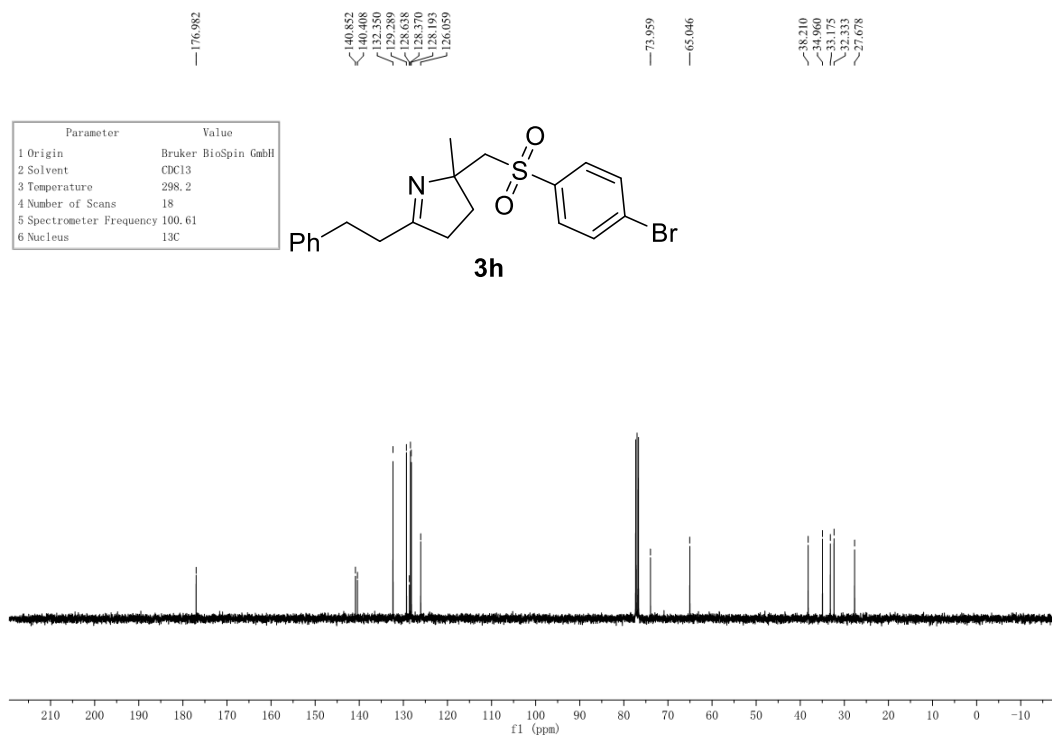

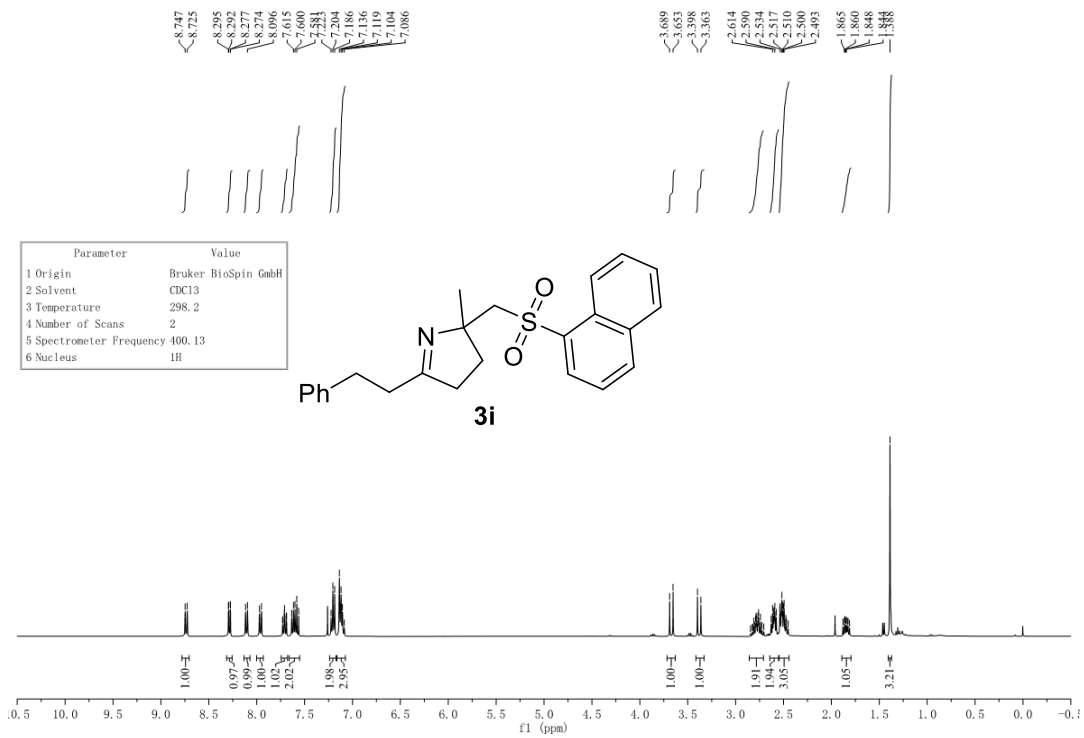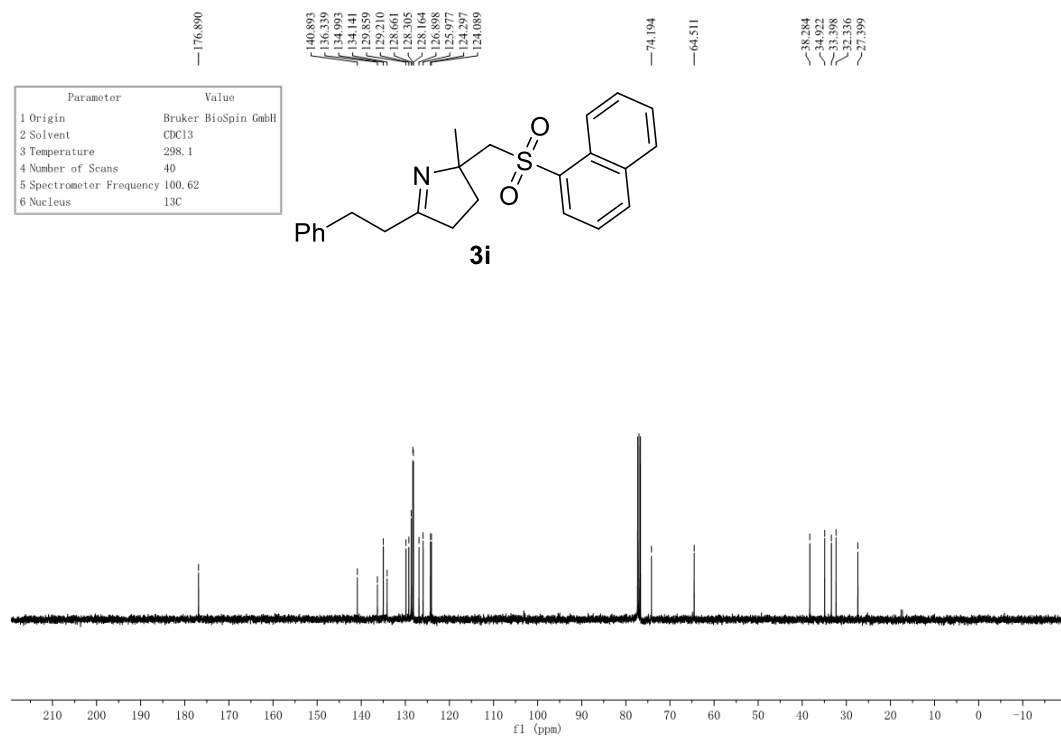

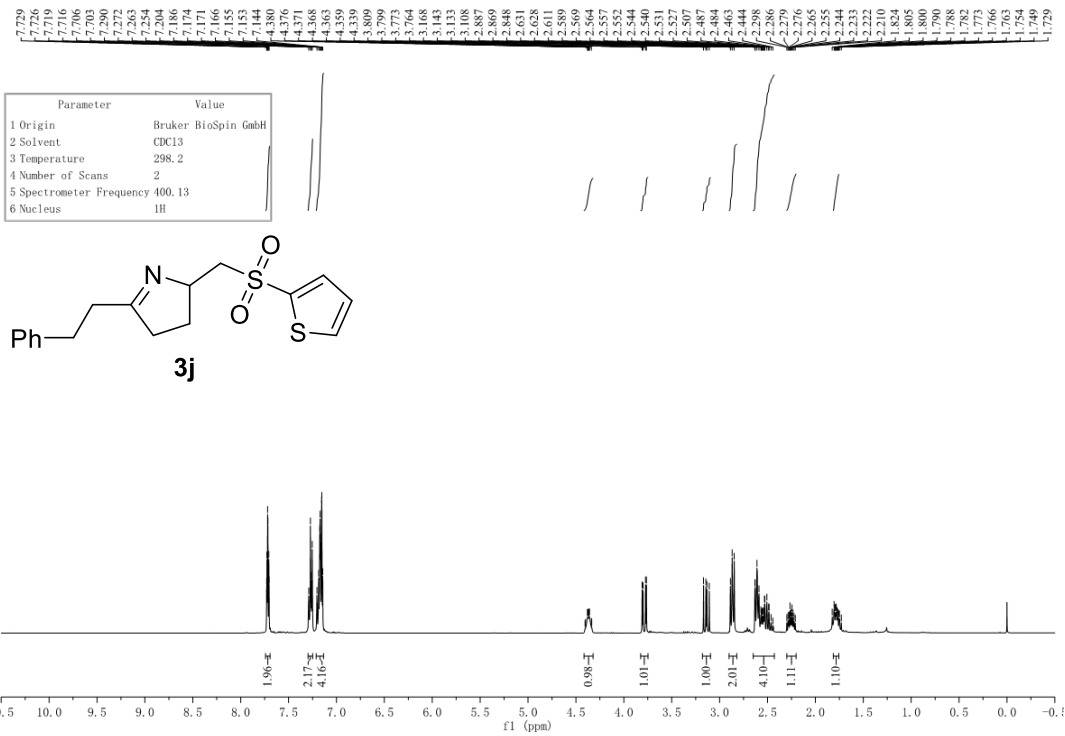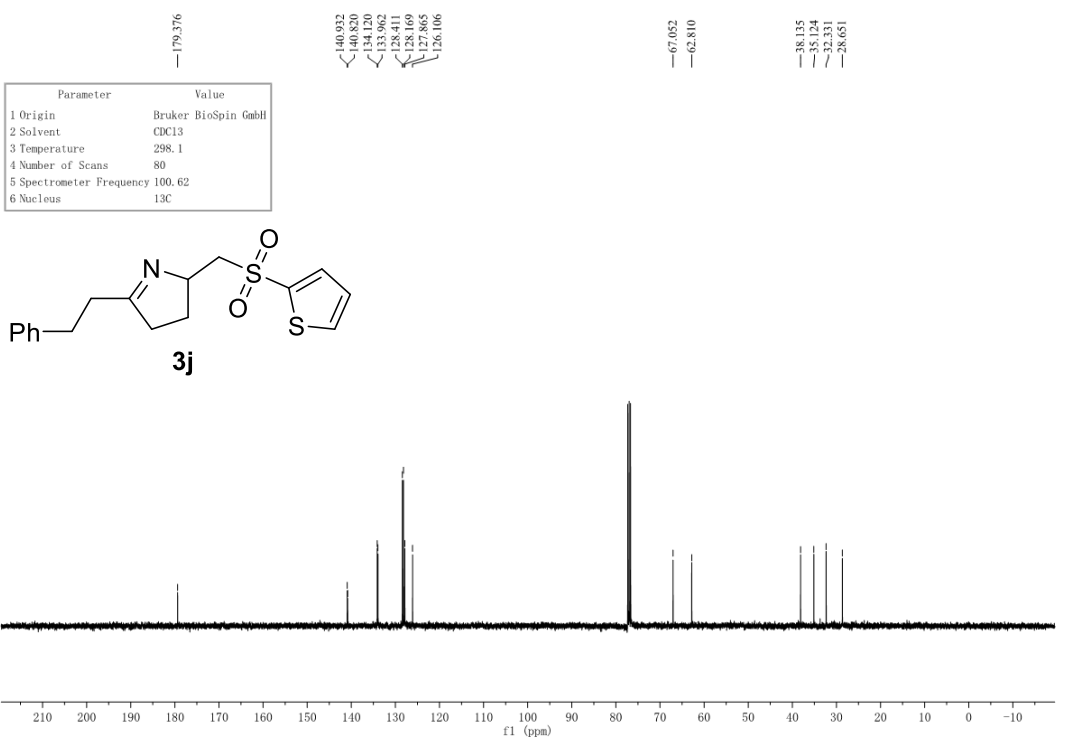

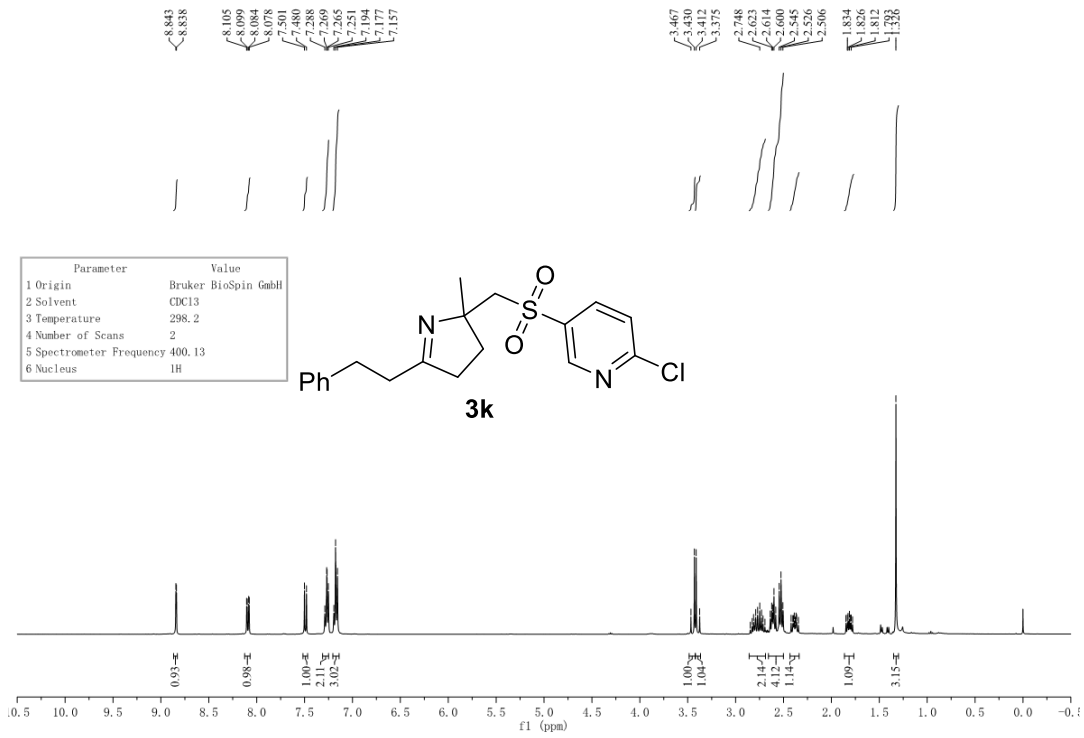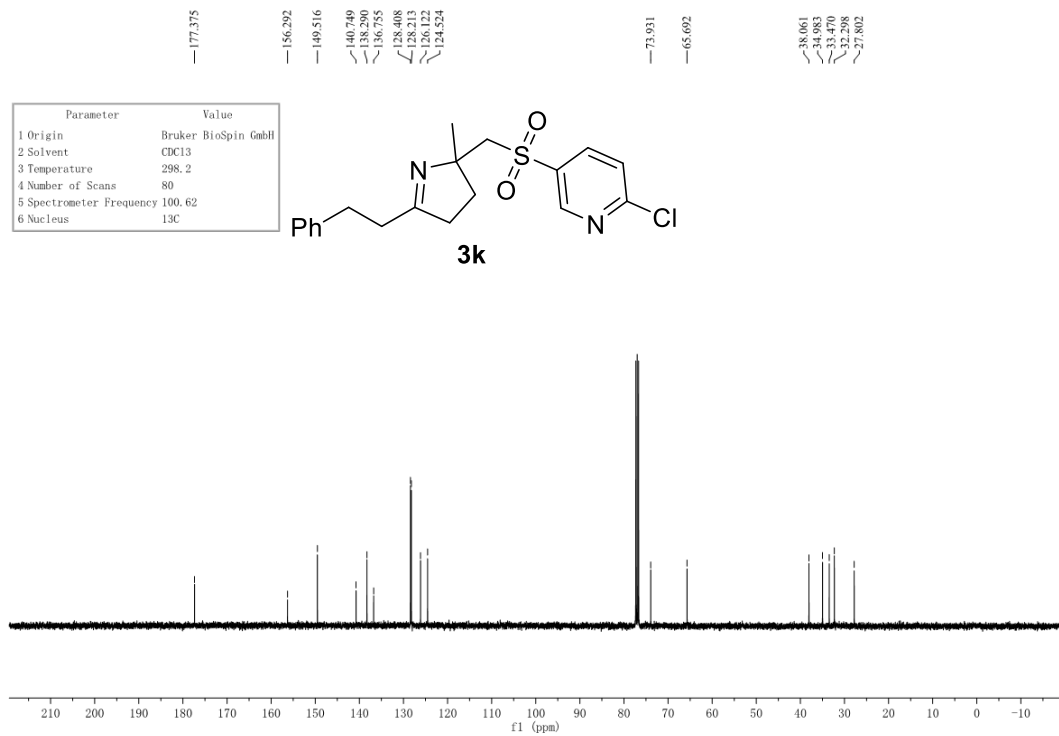



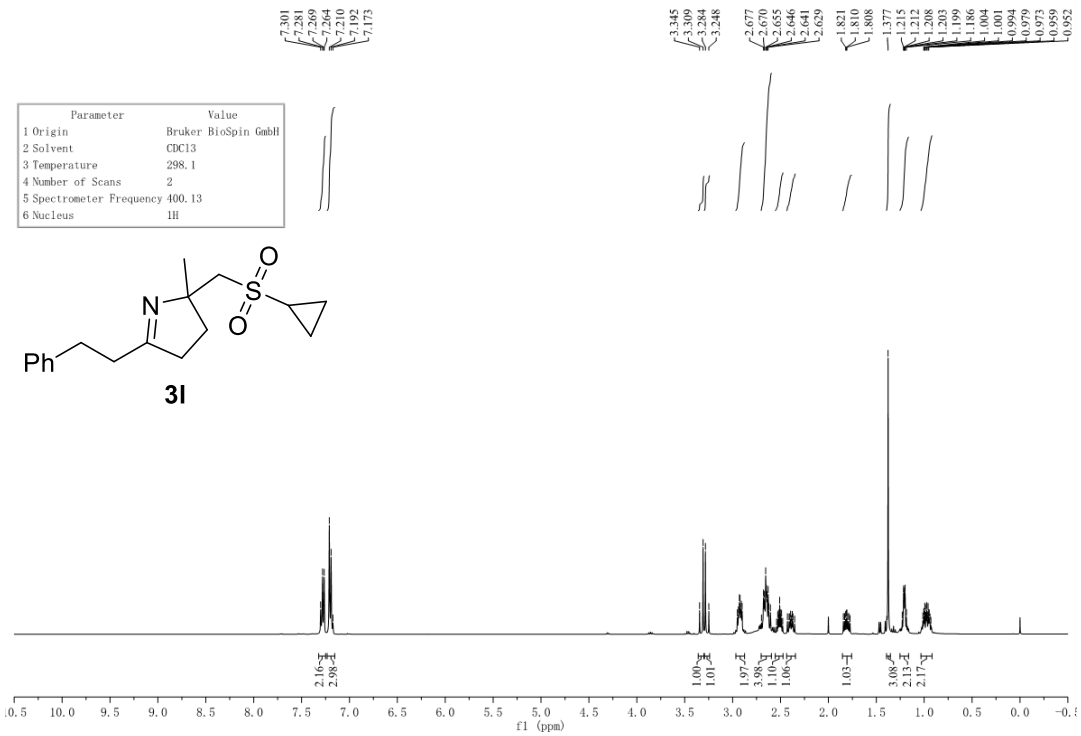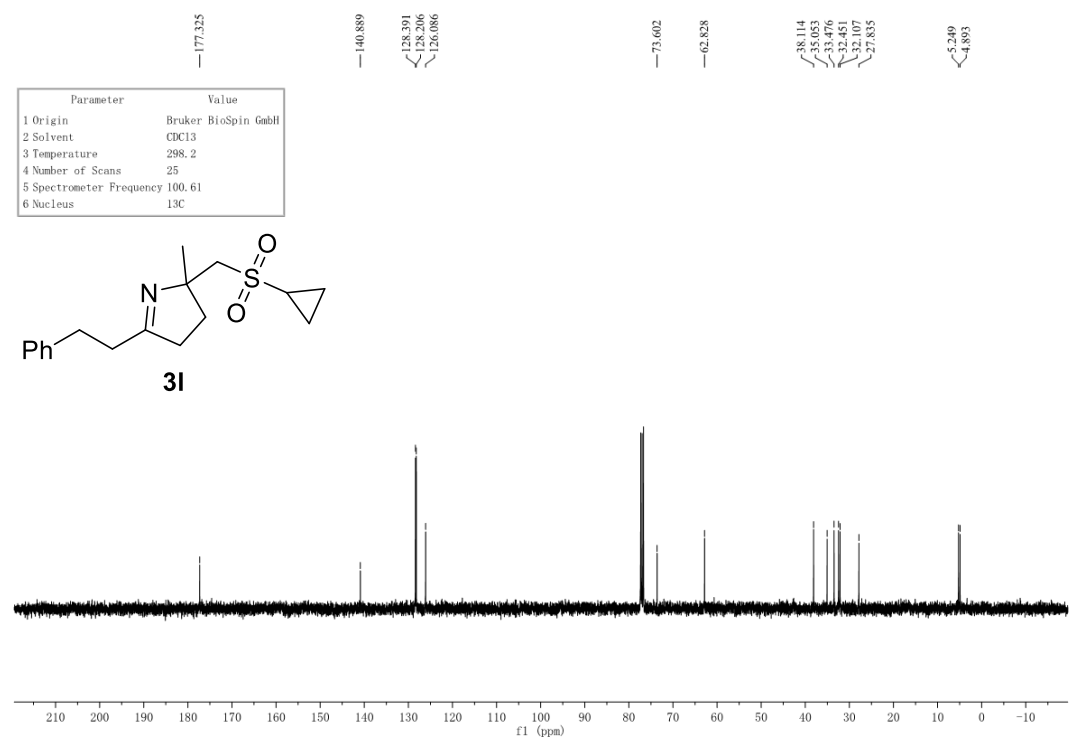

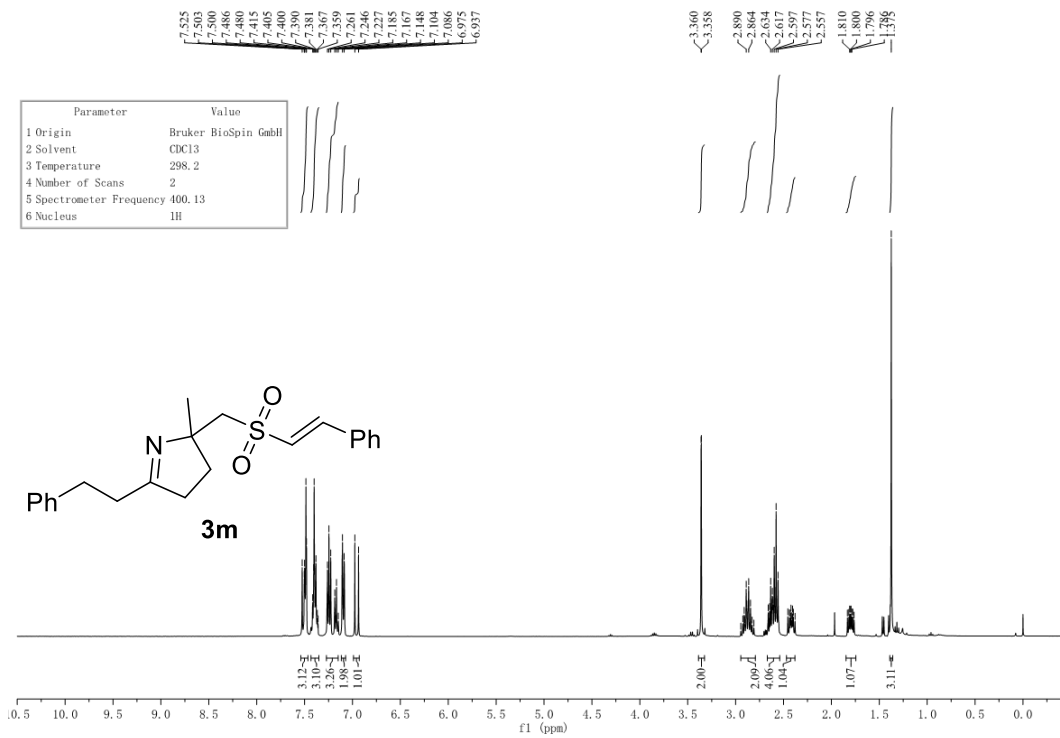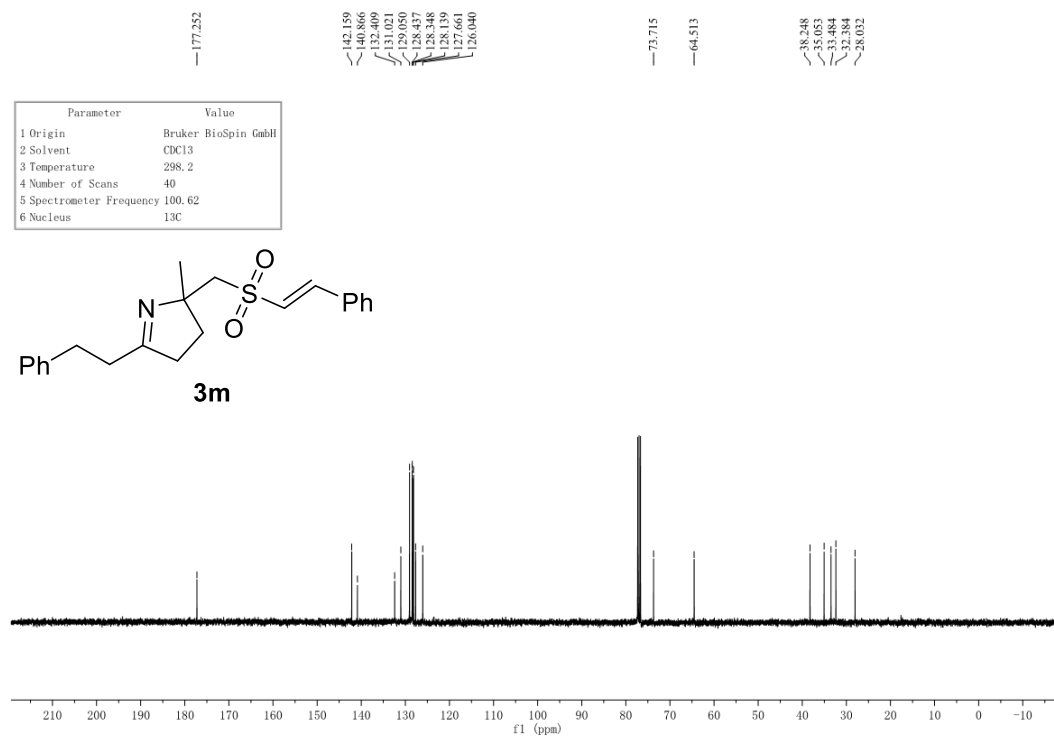

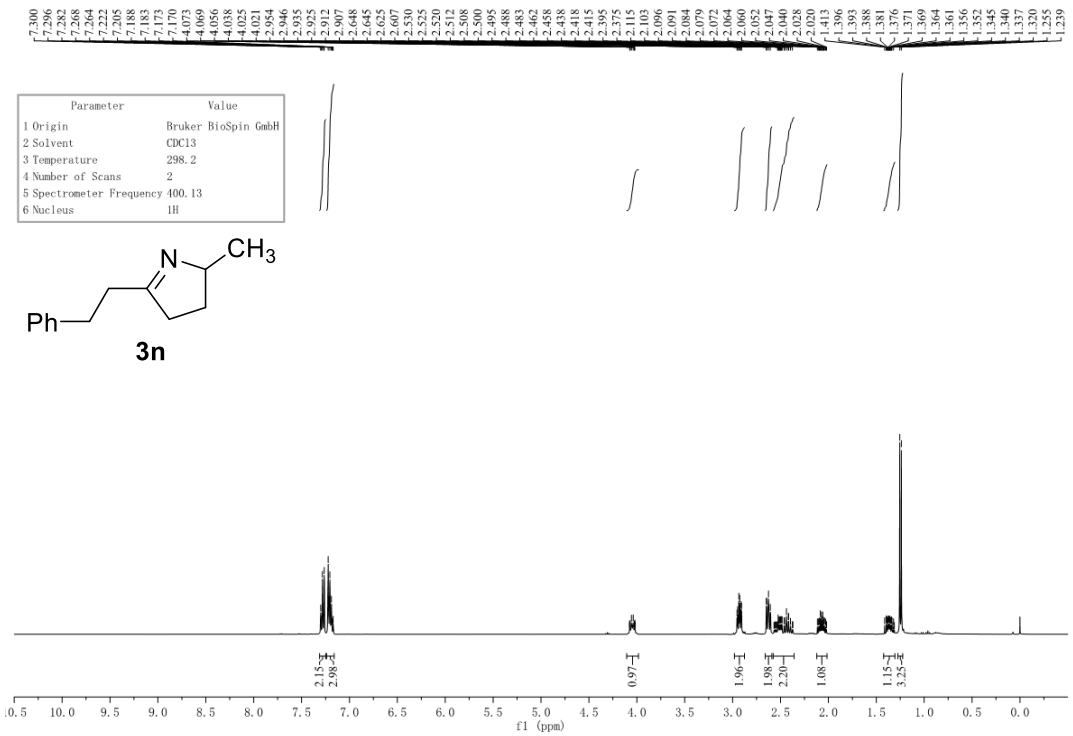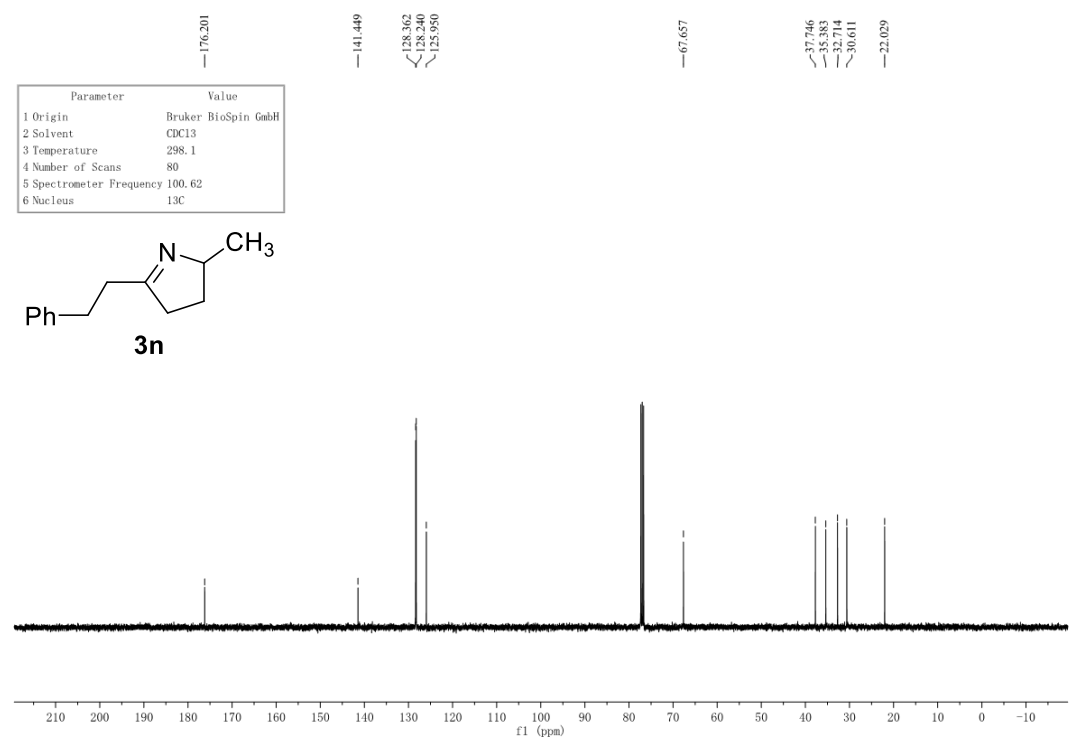

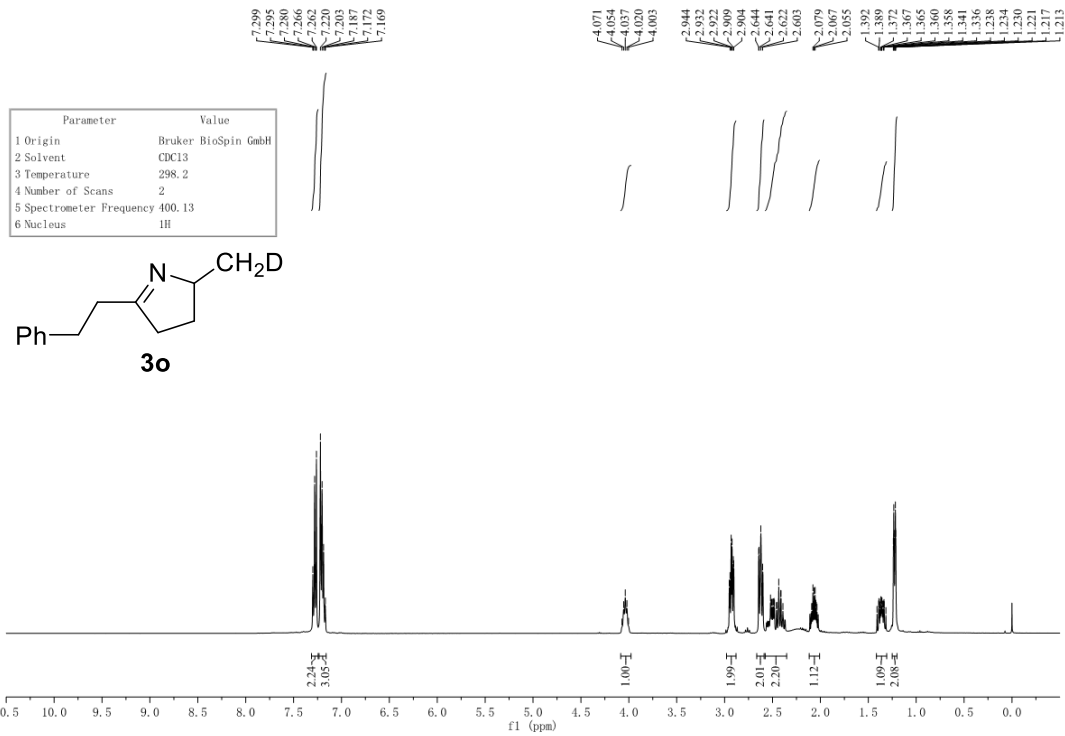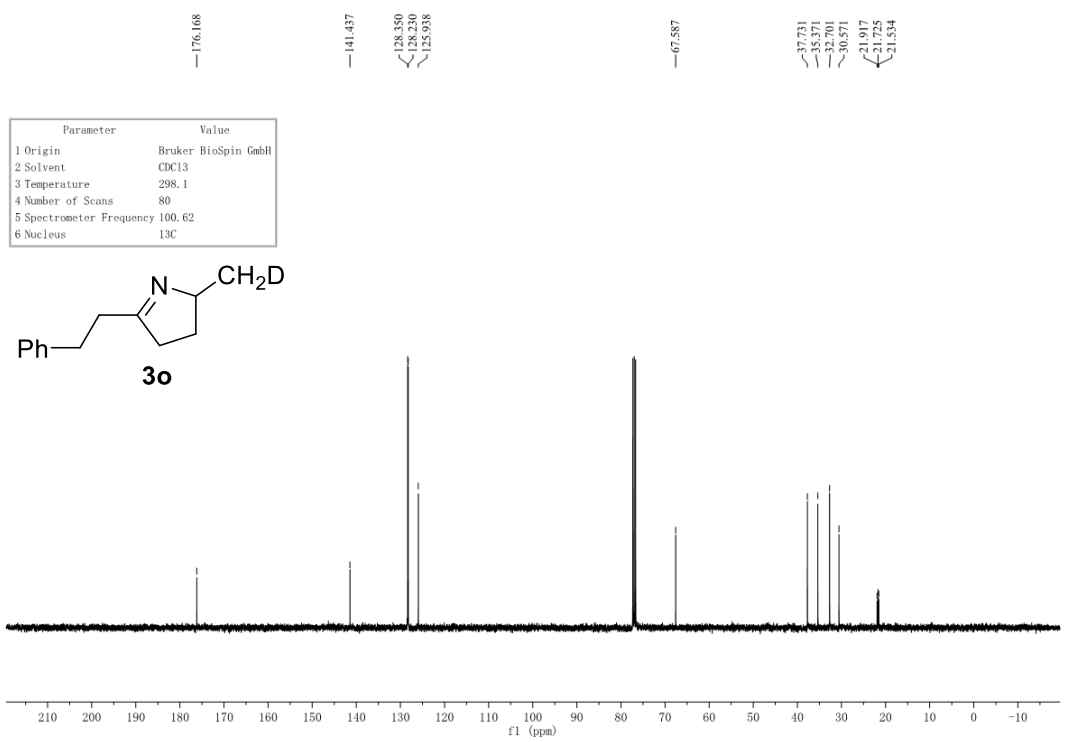

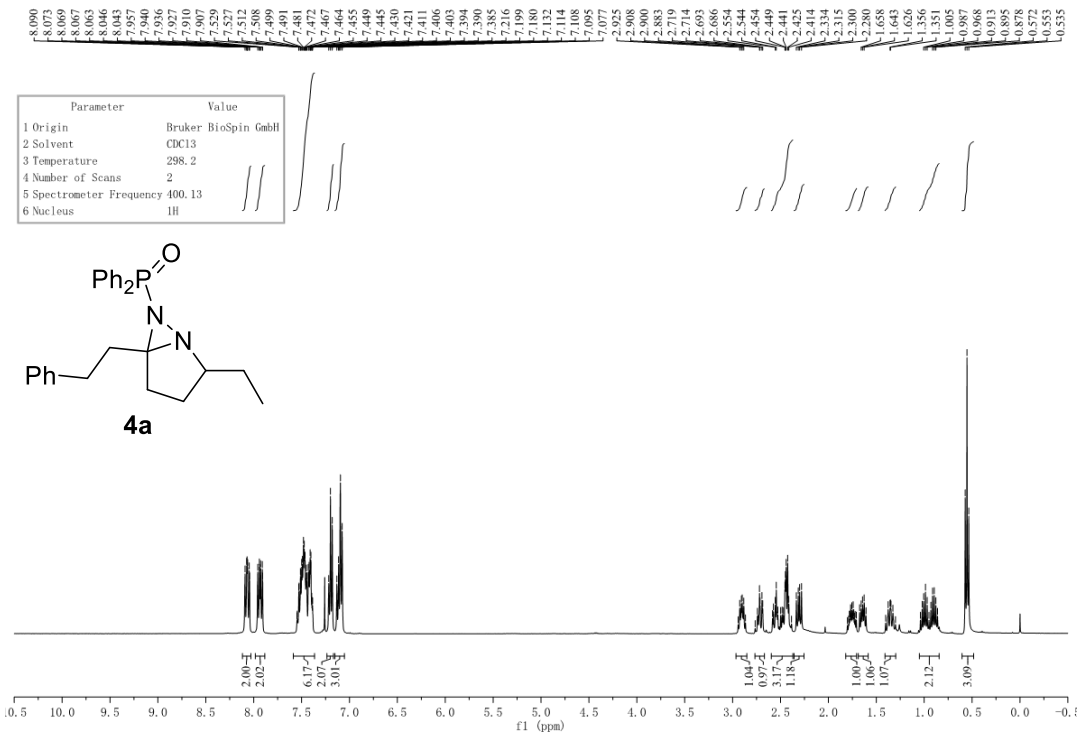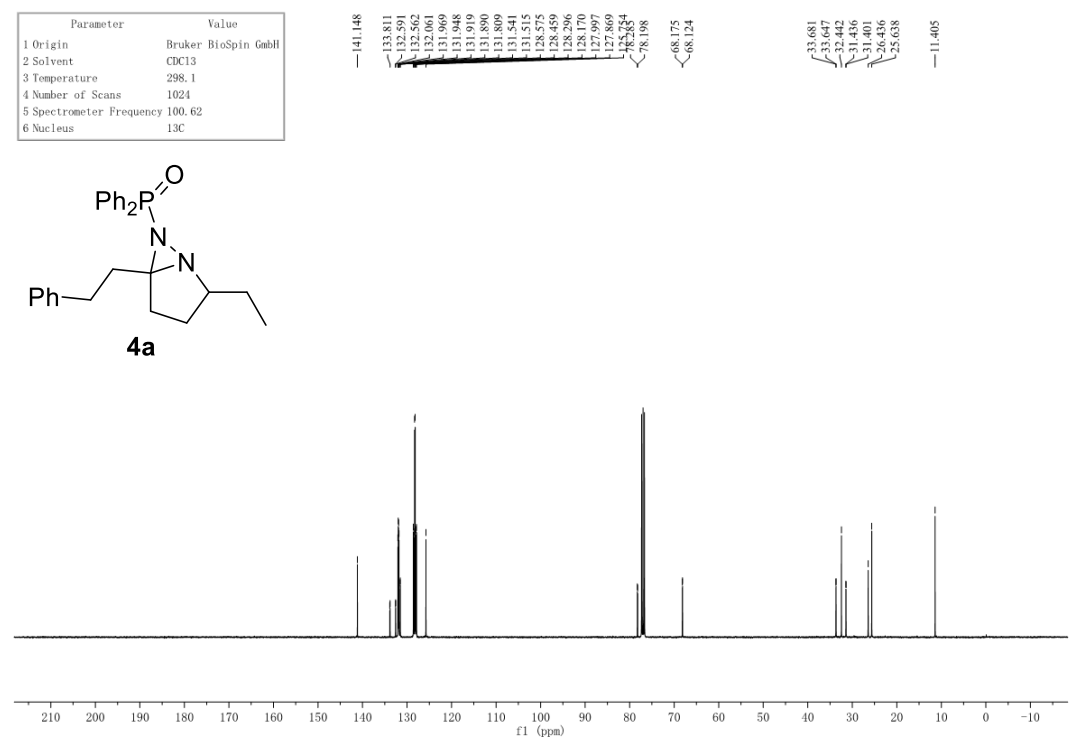

| Parameter                | Value               |
|--------------------------|---------------------|
| 1 Origin                 | Bruker BioSpin GmbH |
| 2 Solvent                | CDCl3               |
| 3 Temperature            | 298.3               |
| 4 Number of Scans        | 2                   |
| 5 Spectrometer Frequency | 161.97              |
| 6 Nucleus                | 31P                 |

-28.666

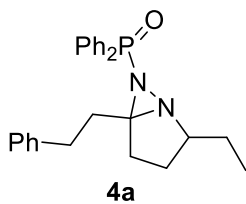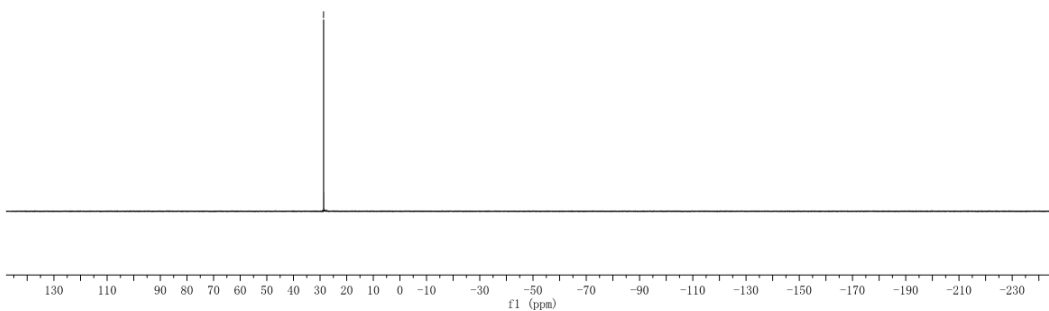

7.988  
7.985  
7.968  
7.959  
7.941  
7.938  
7.932  
7.929  
7.912  
7.908  
7.852  
7.829  
7.814  
7.811  
7.491  
7.485  
7.477  
7.472  
7.468  
7.466  
7.460  
7.456  
7.451  
7.446  
7.441  
7.432  
7.426  
7.422  
7.417  
7.413  
7.405  
7.401  
7.396  
7.234  
7.216  
7.197  
7.150  
7.132  
7.132  
6.986  
6.969  
3.041  
3.035  
2.343  
2.323  
2.308  
2.289  
2.113  
2.098  
2.092  
2.077  
2.060  
1.772  
1.738  
1.620  
1.586  
1.586  
1.418  
1.409  
1.391  
1.380  
1.363  
1.355  
1.103  
1.006  
0.999  
0.989  
0.974  
0.963

| Parameter                | Value               |
|--------------------------|---------------------|
| 1 Origin                 | Bruker BioSpin GmbH |
| 2 Solvent                | CDCl3               |
| 3 Temperature            | 296.8               |
| 4 Number of Scans        | 2                   |
| 5 Spectrometer Frequency | 400.15              |
| 6 Nucleus                | 1H                  |

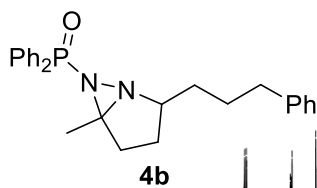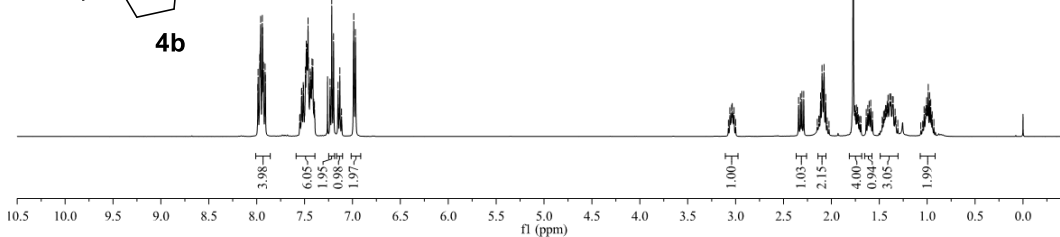

| Parameter                | Value               |
|--------------------------|---------------------|
| 1 Origin                 | Bruker BioSpin GmbH |
| 2 Solvent                | CDCl3               |
| 3 Temperature            | 296.9               |
| 4 Number of Scans        | 73                  |
| 5 Spectrometer Frequency | 100.62              |
| 6 Nucleus                | 13C                 |

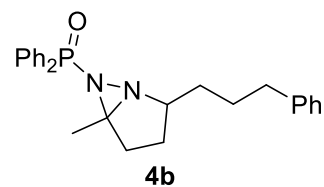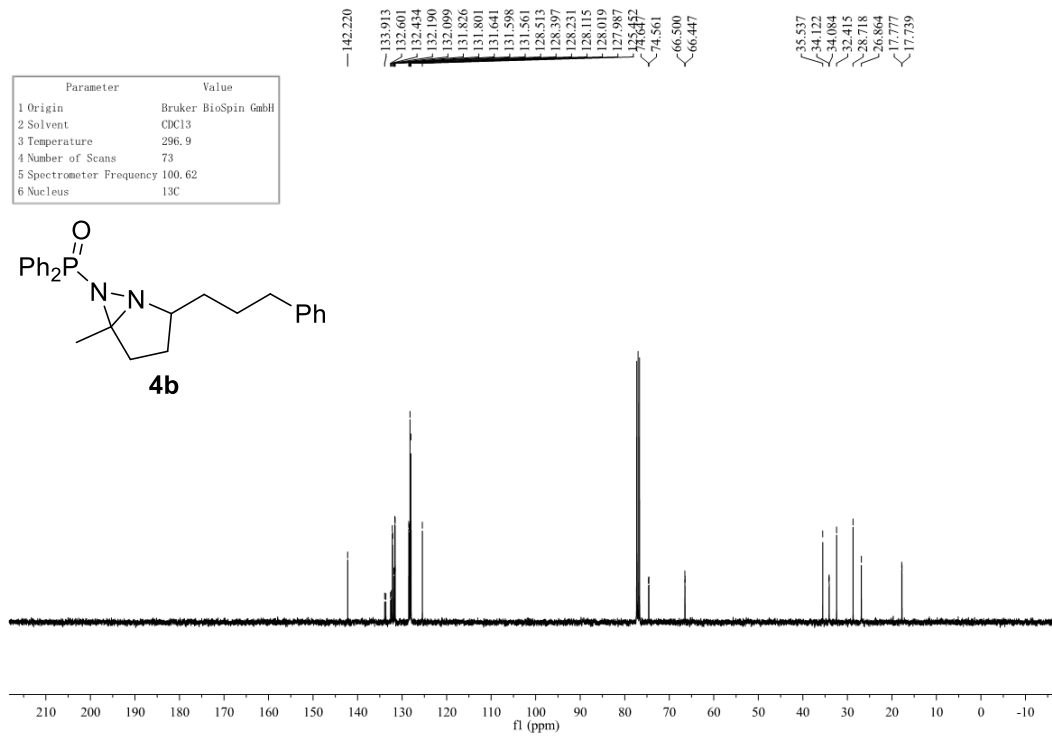

| Parameter                | Value               |
|--------------------------|---------------------|
| 1 Origin                 | Bruker BioSpin GmbH |
| 2 Solvent                | CDCl3               |
| 3 Temperature            | 296.9               |
| 4 Number of Scans        | 2                   |
| 5 Spectrometer Frequency | 161.98              |
| 6 Nucleus                | 31P                 |

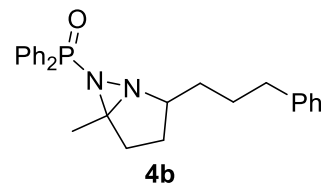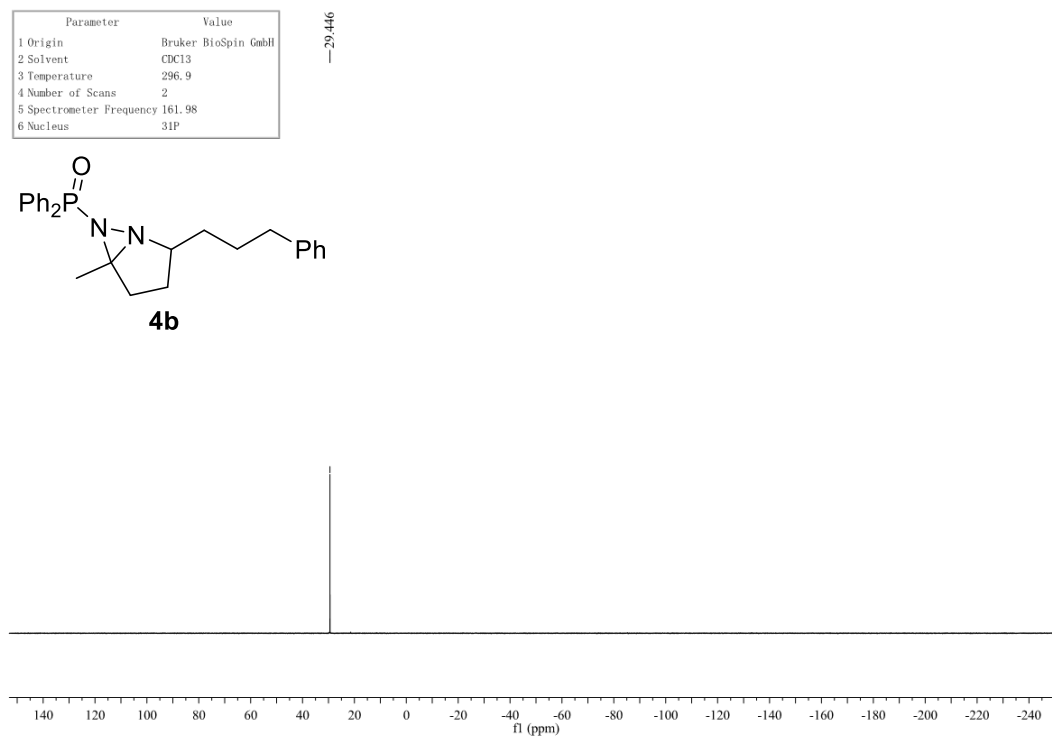

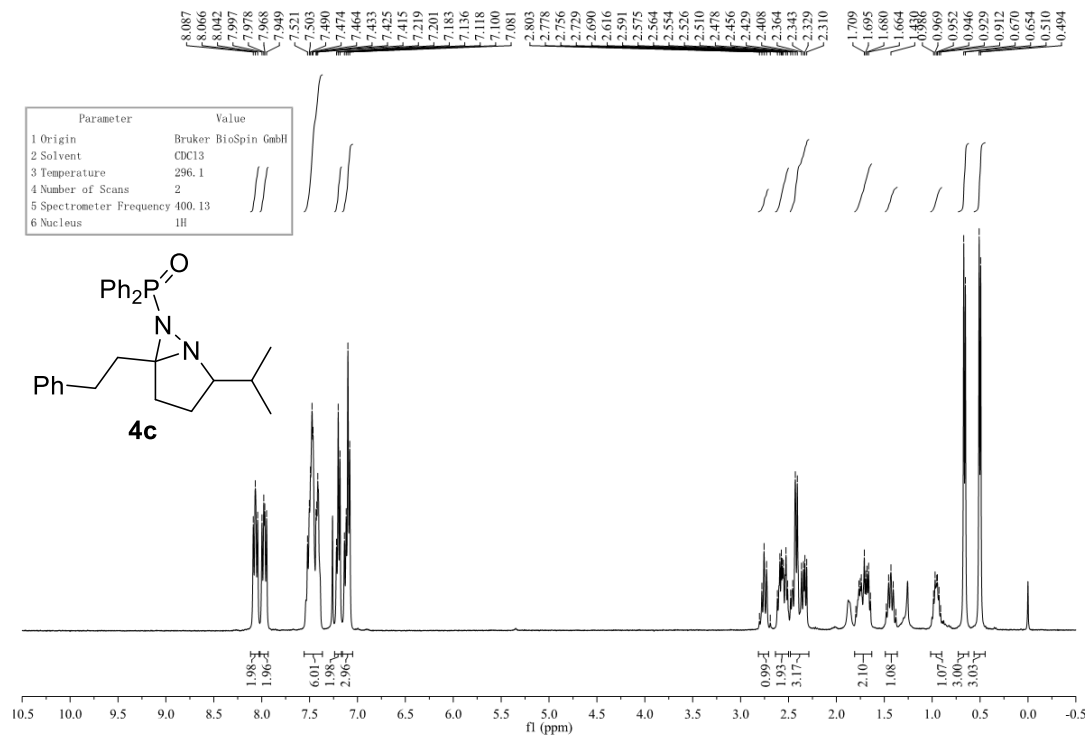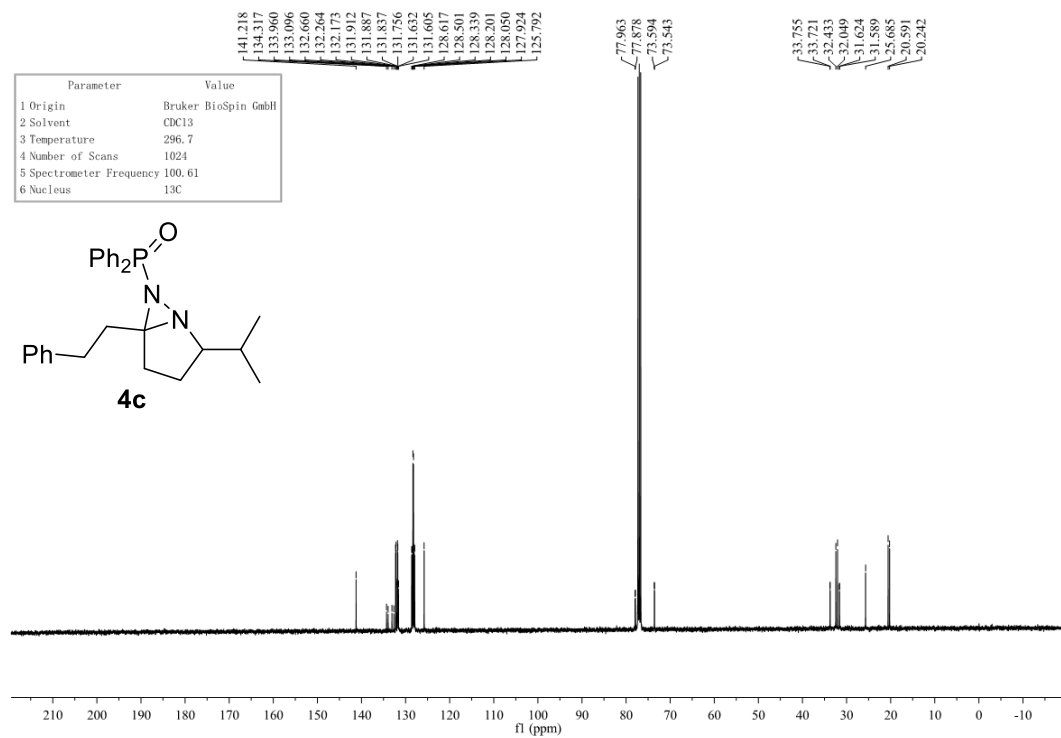



| Parameter                | Value               |
|--------------------------|---------------------|
| 1 Origin                 | Bruker BioSpin GmbH |
| 2 Solvent                | CDCl3               |
| 3 Temperature            | 295.4               |
| 4 Number of Scans        | 2                   |
| 5 Spectrometer Frequency | 161.97              |
| 6 Nucleus                | 31P                 |

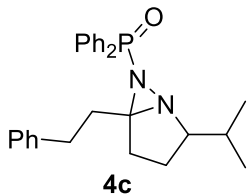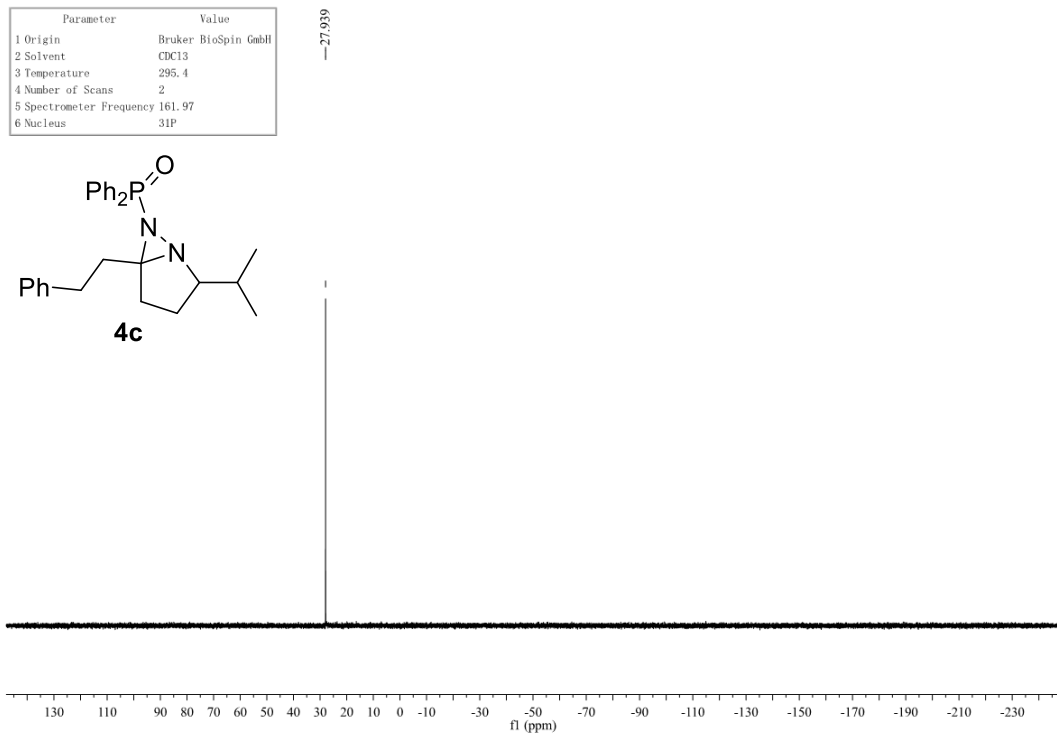

8.095  
8.078  
8.074  
8.068  
8.051  
8.047  
7.941  
7.924  
7.910  
7.911  
7.894  
7.890  
7.847  
7.544  
7.529  
7.526  
7.516  
7.506  
7.495  
7.491  
7.487  
7.479  
7.474  
7.467  
7.466  
7.446  
7.438  
7.429  
7.424  
7.419  
7.415  
7.411  
7.408  
7.398  
7.394  
7.221  
7.204  
7.185  
7.138  
7.120  
7.115  
7.102  
7.089  
7.086  
7.069  
-3.151  
-3.142  
-3.135  
-3.135  
-3.135  
-2.675  
-2.654  
-2.648  
-2.627  
-2.583  
-2.563  
-2.536  
-2.536  
-2.479  
-2.452  
-2.430  
-2.326  
-2.307  
-2.292  
-2.272  
-2.272  
-1.769  
-1.636  
-1.622  
-1.605  
-1.387  
-1.367  
-1.362  
-1.332  
-1.020  
-0.604

| Parameter                | Value               |
|--------------------------|---------------------|
| 1 Origin                 | Bruker BioSpin GmbH |
| 2 Solvent                | CDCl3               |
| 3 Temperature            | 298.2               |
| 4 Number of Scans        | 2                   |
| 5 Spectrometer Frequency | 400.13              |
| 6 Nucleus                | 1H                  |

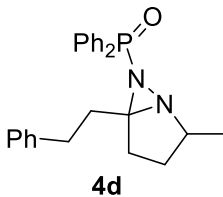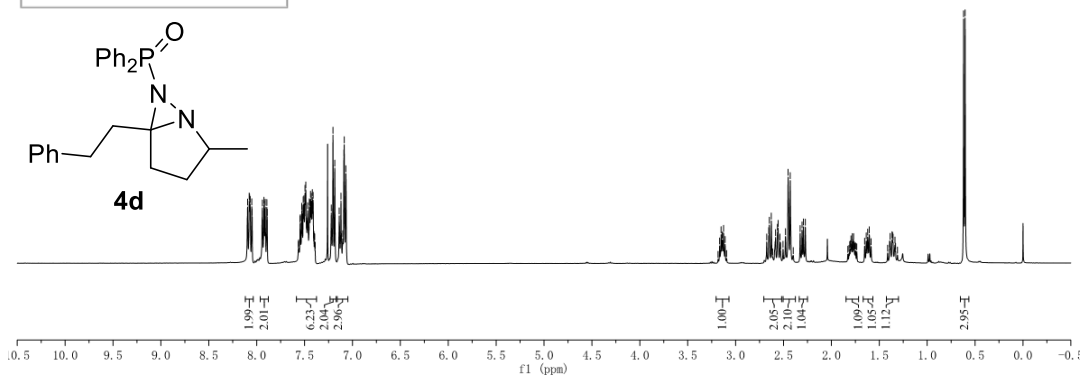

| Parameter                | Value               |
|--------------------------|---------------------|
| 1 Origin                 | Bruker BioSpin GmbH |
| 2 Solvent                | CDCl3               |
| 3 Temperature            | 298.1               |
| 4 Number of Scans        | 1024                |
| 5 Spectrometer Frequency | 100.61              |
| 6 Nucleus                | 13C                 |

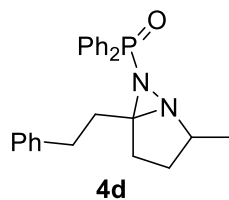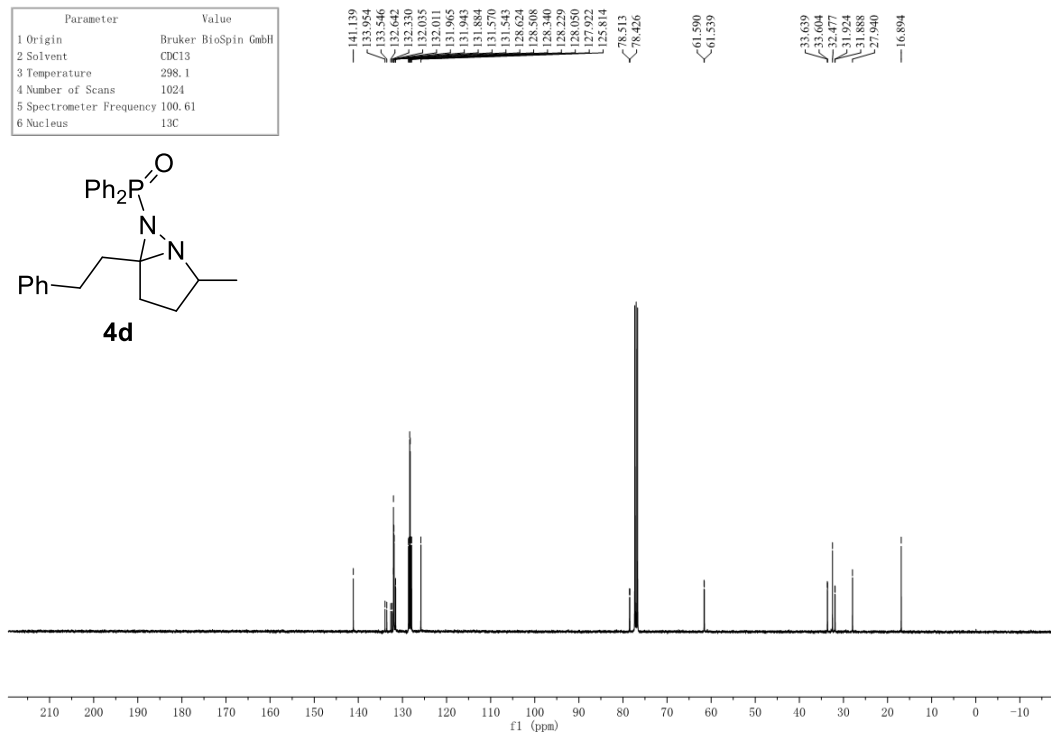

| Parameter                | Value               |
|--------------------------|---------------------|
| 1 Origin                 | Bruker BioSpin GmbH |
| 2 Solvent                | CDCl3               |
| 3 Temperature            | 298.2               |
| 4 Number of Scans        | 2                   |
| 5 Spectrometer Frequency | 161.98              |
| 6 Nucleus                | 31P                 |

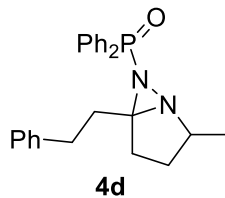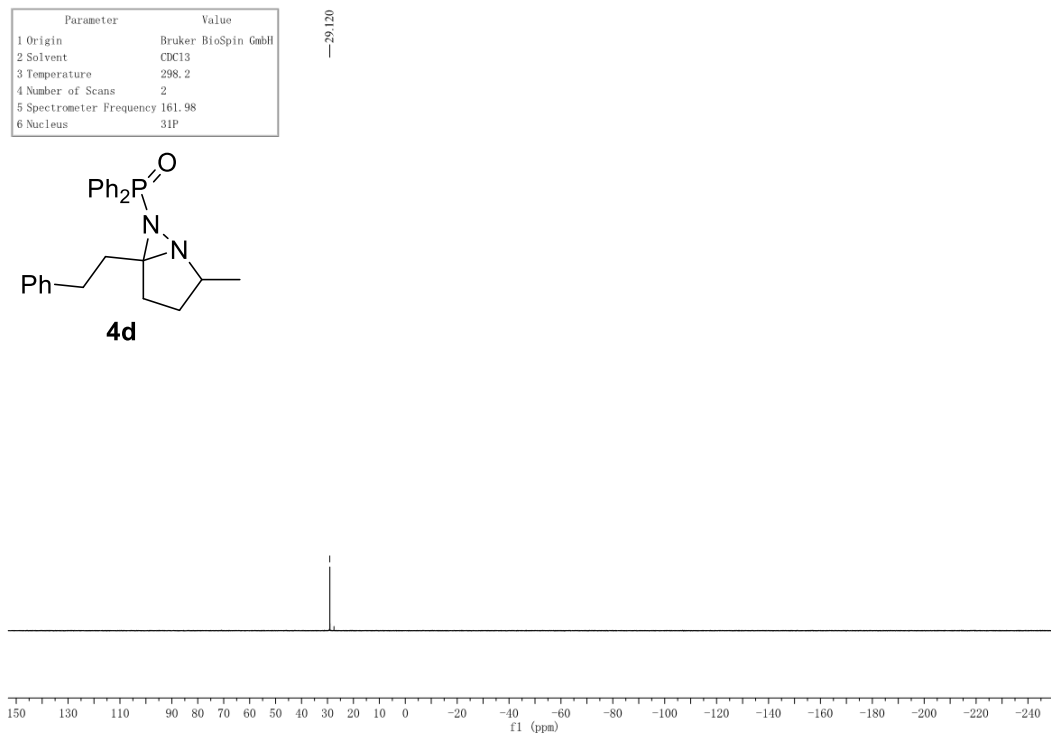

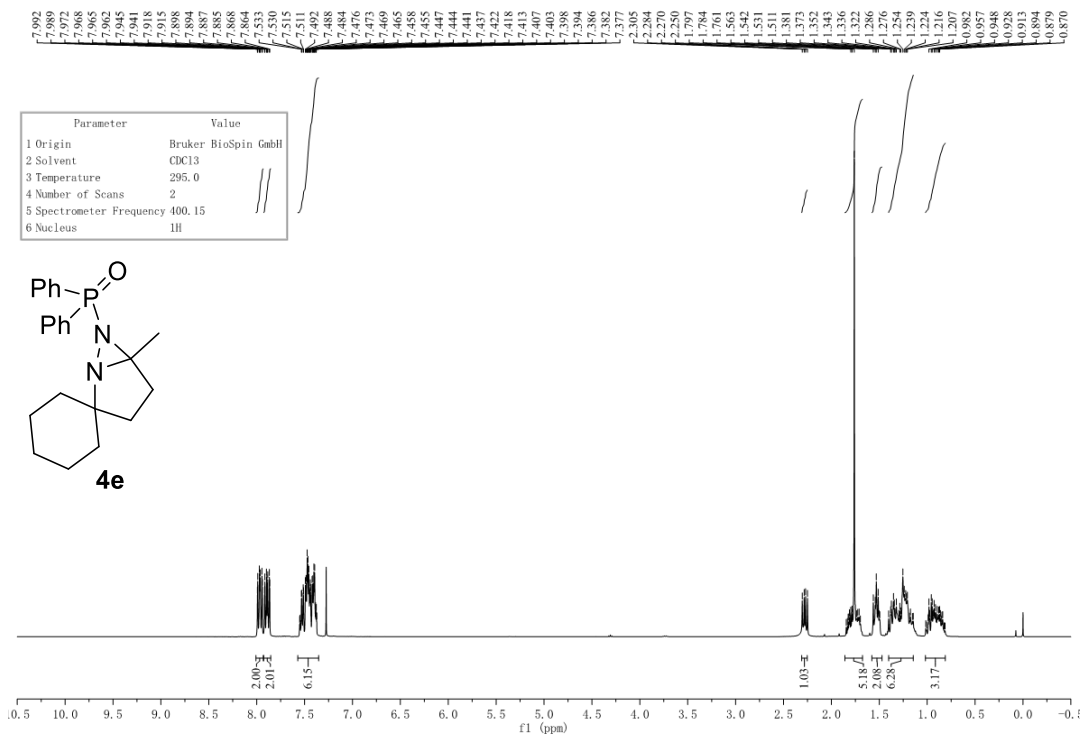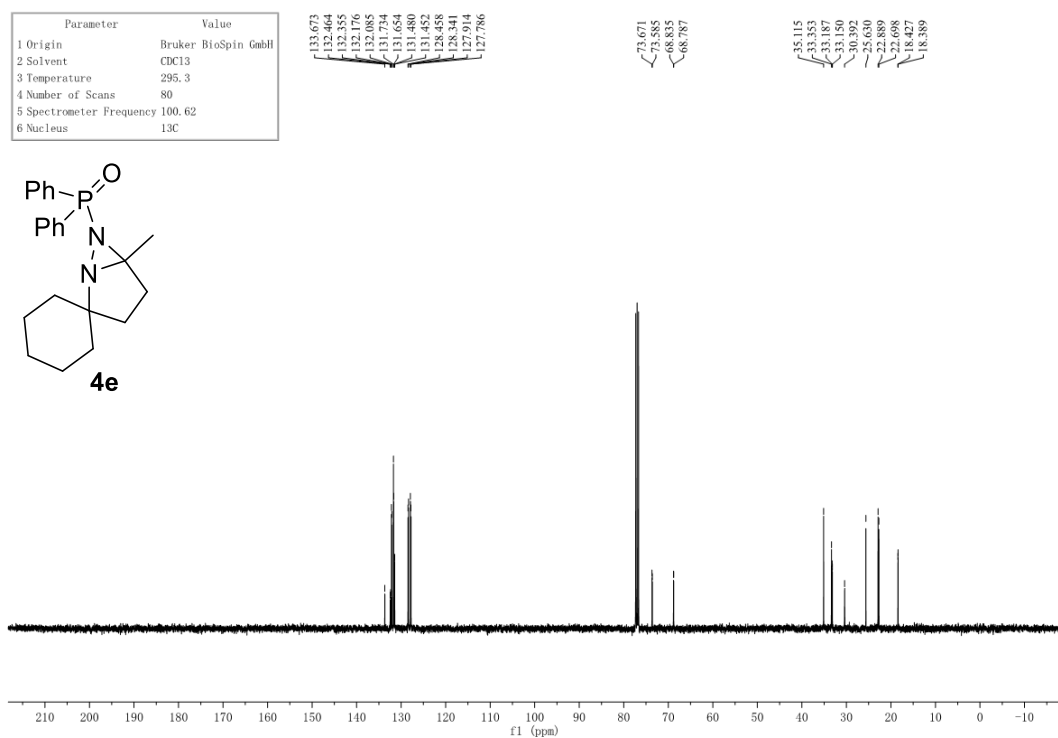

| Parameter                | Value               |
|--------------------------|---------------------|
| 1 Origin                 | Bruker BioSpin GmbH |
| 2 Solvent                | CDCl3               |
| 3 Temperature            | 295.1               |
| 4 Number of Scans        | 2                   |
| 5 Spectrometer Frequency | 161.98              |
| 6 Nucleus                | 31P                 |

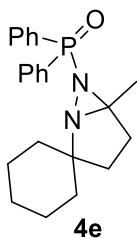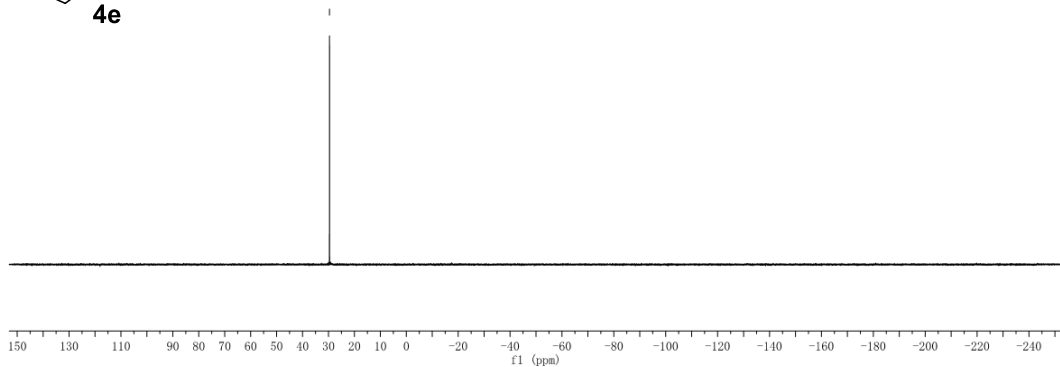

7.981  
7.964  
7.960  
7.954  
7.937  
7.933  
7.864  
7.847  
7.843  
7.834  
7.817  
7.813  
7.530  
7.514  
7.511  
7.488  
7.480  
7.469  
7.464  
7.443  
7.428  
7.425  
7.407  
7.399  
7.388  
7.384  
7.380  
7.372  
7.367  
7.363  
2.255  
2.236  
2.220  
2.201  
1.753  
1.701  
1.664  
1.638  
1.620  
1.611  
1.592  
1.536  
1.524  
1.517  
1.509  
1.430  
1.408  
1.399  
1.379  
1.353  
1.329  
1.317  
1.301  
1.298  
1.278  
1.266  
1.244  
1.236  
1.175  
1.112  
1.089  
1.075  
1.053  
1.071  
1.047  
1.036  
1.011

| Parameter                | Value               |
|--------------------------|---------------------|
| 1 Origin                 | Bruker BioSpin GmbH |
| 2 Solvent                | CDCl3               |
| 3 Temperature            | 295.5               |
| 4 Number of Scans        | 2                   |
| 5 Spectrometer Frequency | 400.15              |
| 6 Nucleus                | 1H                  |

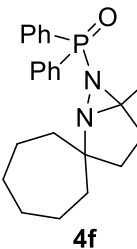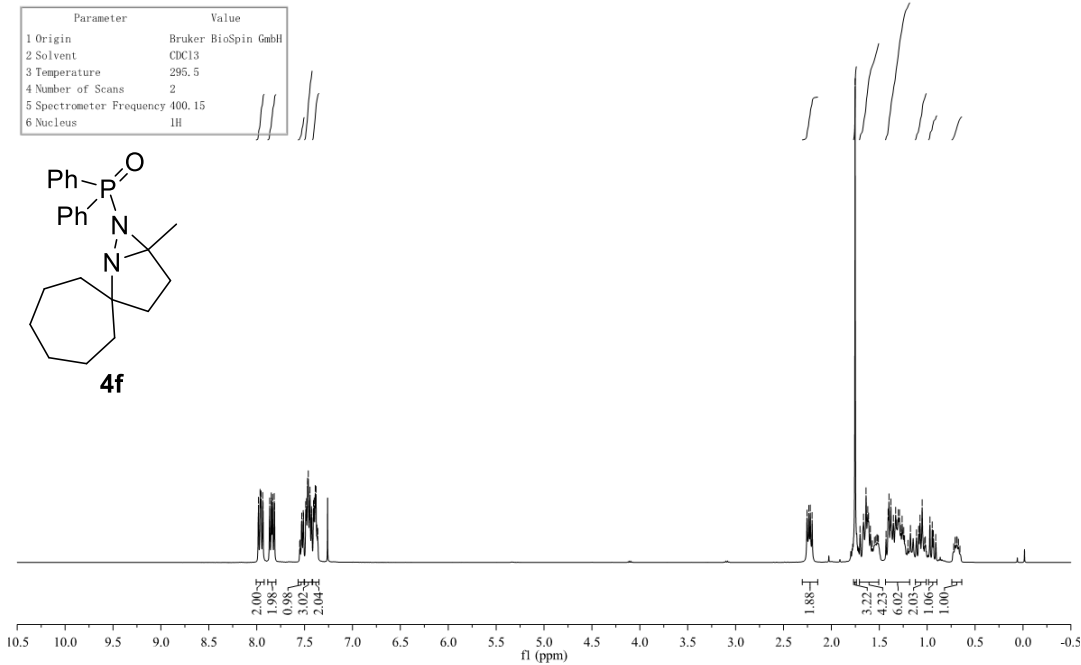

133.678  
133.319  
132.367  
132.101  
132.070  
131.978  
131.863  
131.846  
131.815  
131.782  
131.430  
131.403  
128.477  
128.360  
127.986  
127.857

75.014  
74.928  
72.771  
72.725

37.331  
36.030  
32.906  
32.809  
32.632  
30.535  
30.434  
23.248  
22.918  
18.412  
18.375

| Parameter                | Value               |
|--------------------------|---------------------|
| 1 Origin                 | Bruker BioSpin GmbH |
| 2 Solvent                | CDCl3               |
| 3 Temperature            | 296.0               |
| 4 Number of Scans        | 80                  |
| 5 Spectrometer Frequency | 100.62              |
| 6 Nucleus                | 13C                 |

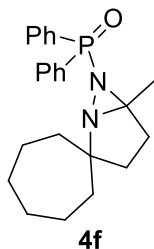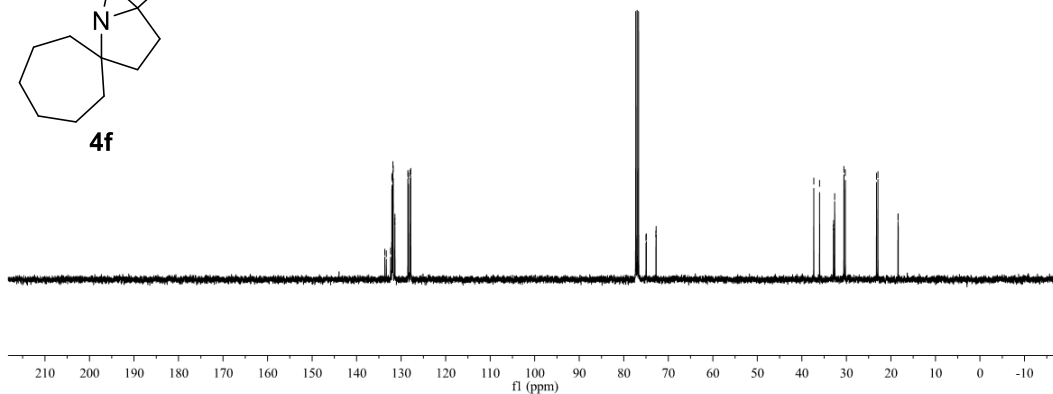

| Parameter                | Value               |
|--------------------------|---------------------|
| 1 Origin                 | Bruker BioSpin GmbH |
| 2 Solvent                | CDCl3               |
| 3 Temperature            | 295.8               |
| 4 Number of Scans        | 2                   |
| 5 Spectrometer Frequency | 161.98              |
| 6 Nucleus                | 31P                 |

30.225

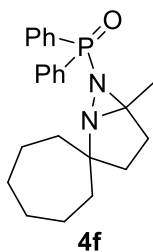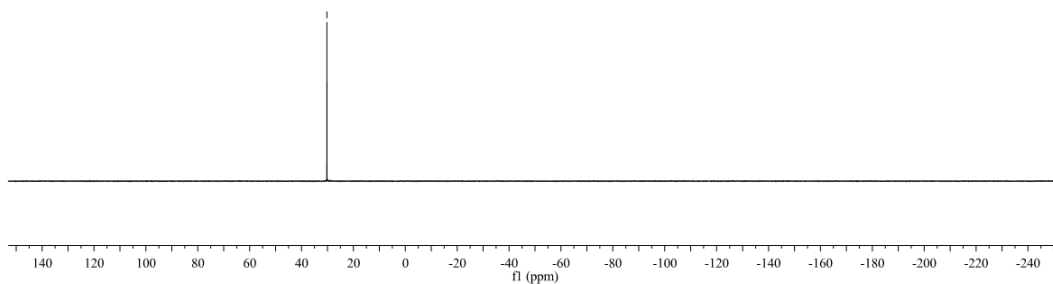

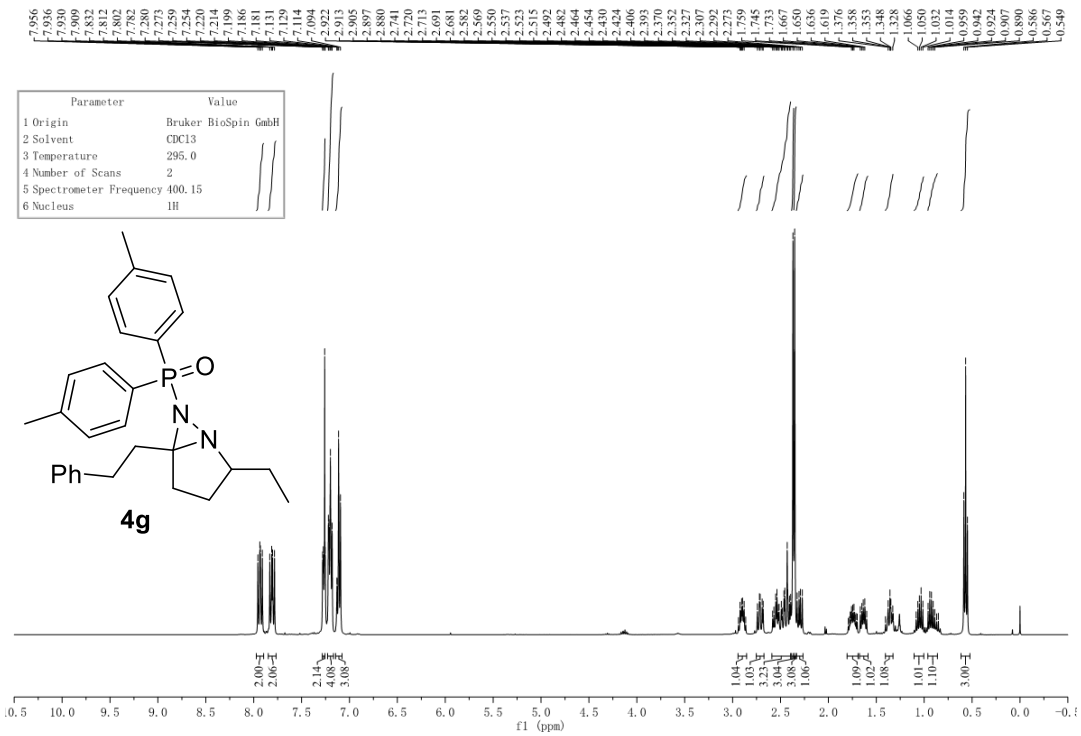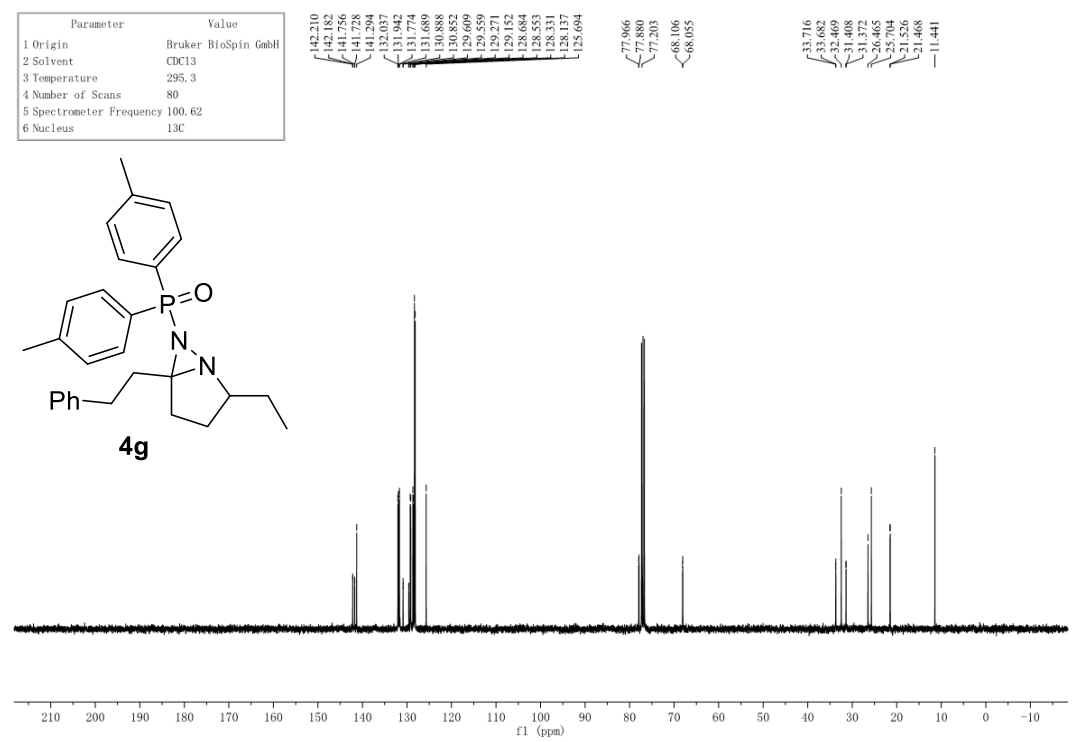

| Parameter                | Value               |
|--------------------------|---------------------|
| 1 Origin                 | Bruker BioSpin GmbH |
| 2 Solvent                | CDCl3               |
| 3 Temperature            | 295.1               |
| 4 Number of Scans        | 2                   |
| 5 Spectrometer Frequency | 161.98              |
| 6 Nucleus                | 31P                 |

-29.199

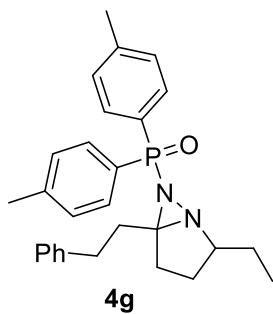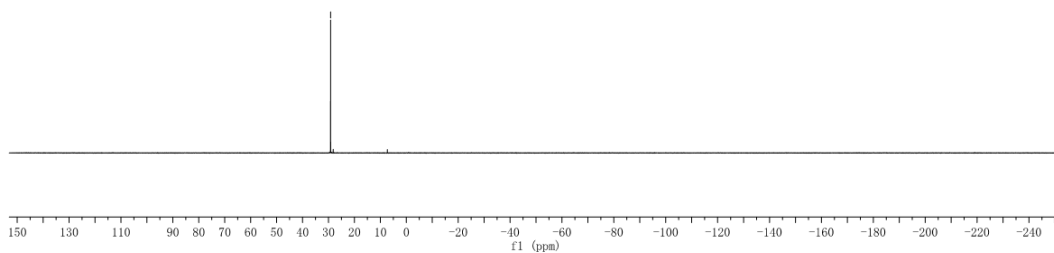

7.091  
7.069  
7.066  
7.043  
7.864  
7.842  
7.835  
7.814  
7.799  
7.709  
7.190  
7.141  
7.121  
7.101  
6.988  
6.983  
6.967  
6.951  
6.934  
6.928  
6.912  
6.906  
5.820  
5.824  
5.815  
5.808  
2.908  
2.900  
2.883  
2.883  
2.735  
2.715  
2.706  
2.686  
2.686  
2.666  
2.569  
2.550  
2.537  
2.523  
2.511  
2.495  
2.483  
2.466  
2.457  
2.427  
2.414  
2.397  
2.385  
2.316  
2.316  
2.286  
2.286  
2.262  
2.262  
1.757  
1.743  
1.731  
1.698  
1.670  
1.654  
1.654  
1.623  
1.604  
1.365  
1.340  
1.316  
1.316  
1.074  
1.038  
1.022  
1.022  
0.969  
0.960  
0.951  
0.934  
0.917  
0.899  
0.885  
0.896  
0.578

| Parameter                | Value               |
|--------------------------|---------------------|
| 1 Origin                 | Bruker BioSpin GmbH |
| 2 Solvent                | CDCl3               |
| 3 Temperature            | 295.4               |
| 4 Number of Scans        | 2                   |
| 5 Spectrometer Frequency | 400.13              |
| 6 Nucleus                | 1H                  |

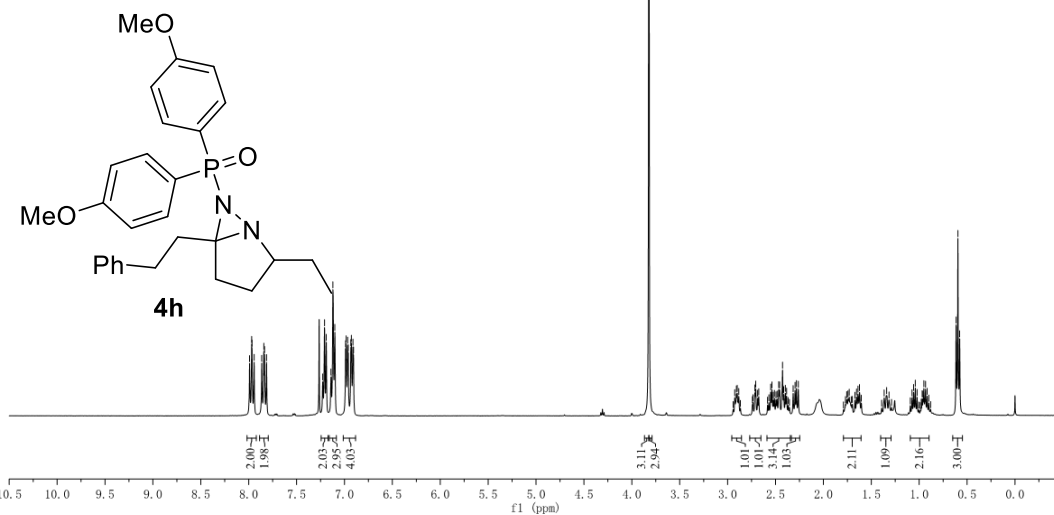

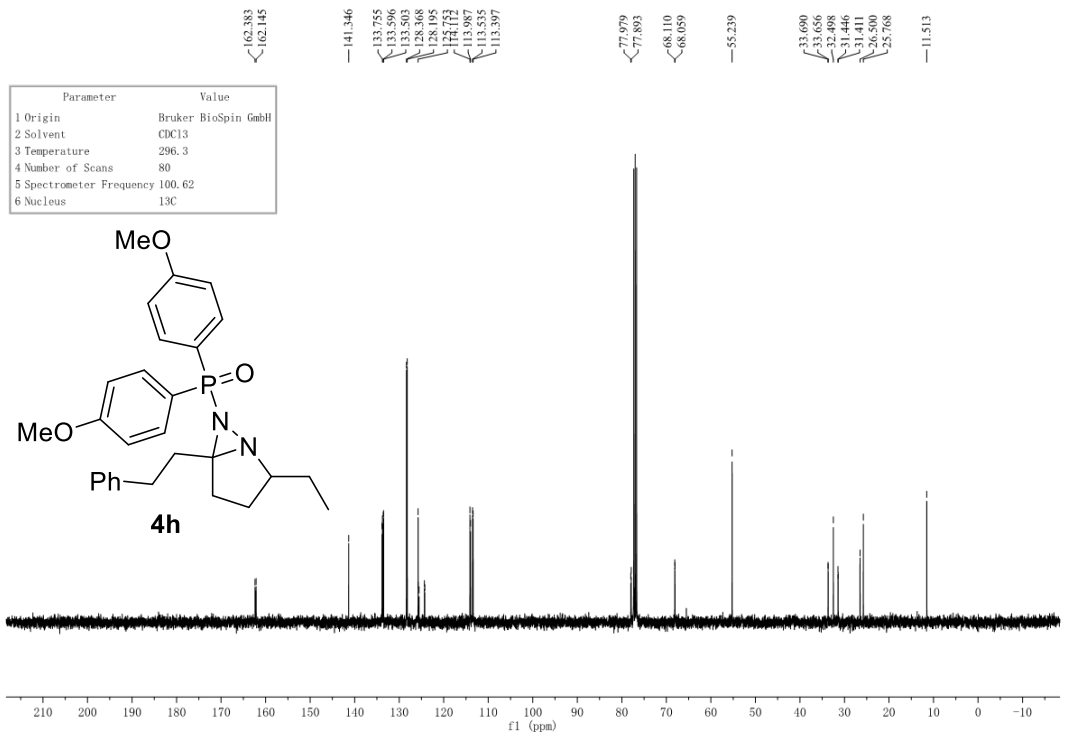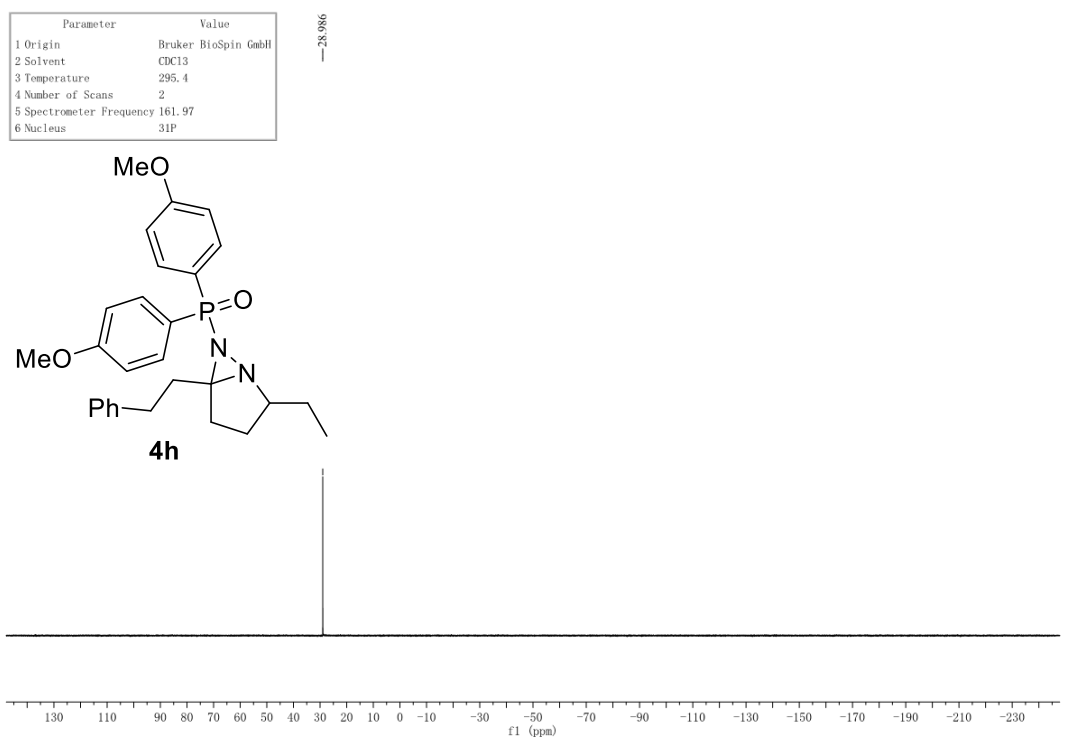



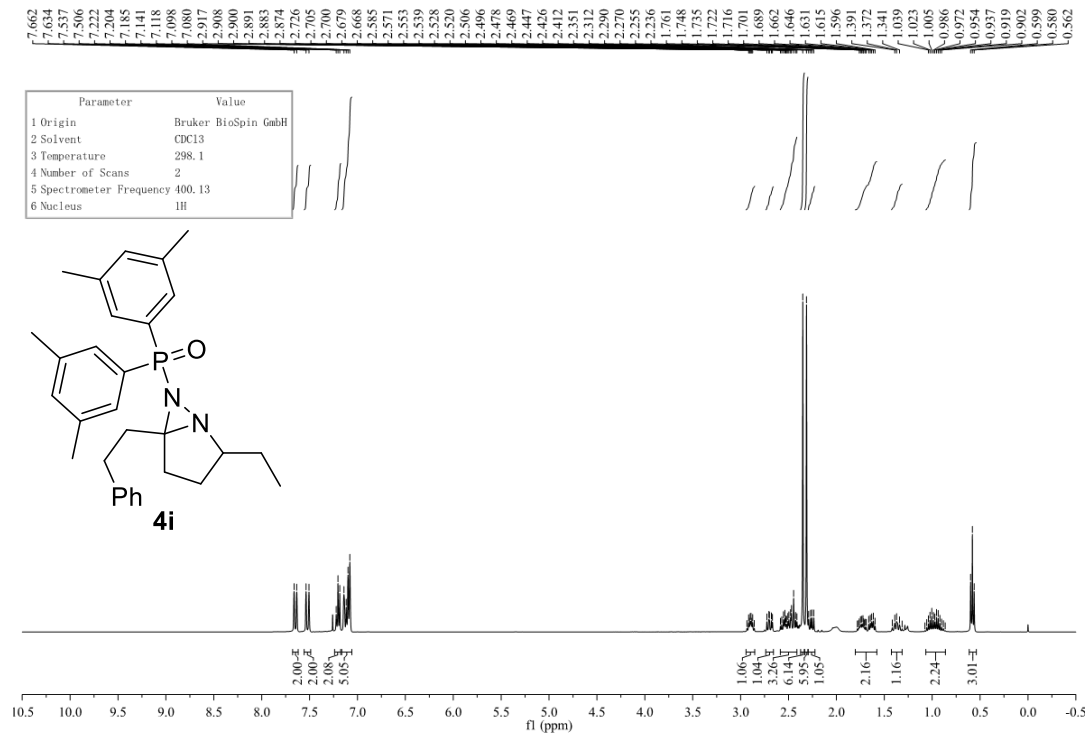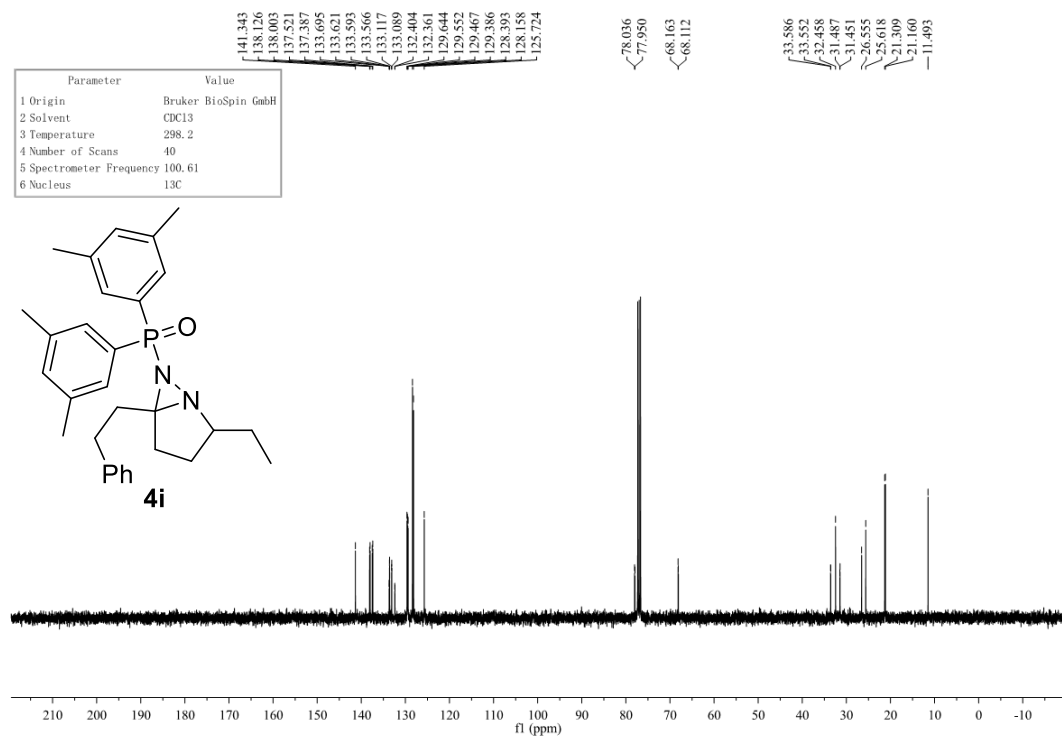

| Parameter                | Value               |
|--------------------------|---------------------|
| 1 Origin                 | Bruker BioSpin GmbH |
| 2 Solvent                | CDCl3               |
| 3 Temperature            | 295.8               |
| 4 Number of Scans        | 2                   |
| 5 Spectrometer Frequency | 161.98              |
| 6 Nucleus                | 31P                 |

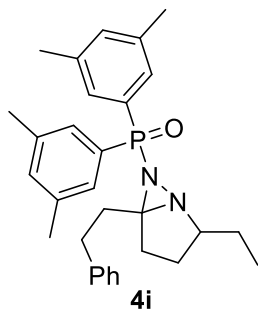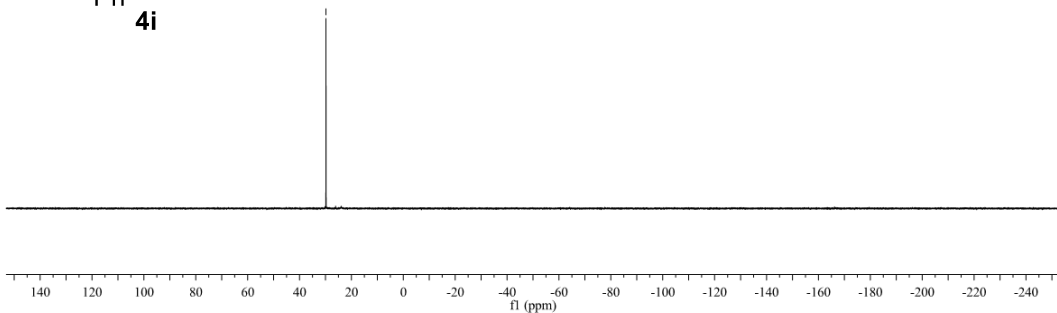

7.298  
7.279  
7.279  
7.260  
7.199  
7.192  
7.185  
7.180  
7.937  
2.929  
2.920  
2.912  
2.903  
2.894  
2.885  
2.882  
2.878  
2.766  
2.746  
2.727  
2.206  
2.192  
2.184  
2.171  
2.151  
1.995  
1.976  
1.972  
1.959  
1.953  
1.939  
1.918  
1.777  
1.759  
1.742  
1.735  
1.725  
1.708  
1.702  
1.696  
1.690  
1.619  
1.603  
1.599  
1.588  
1.582  
1.571  
1.551  
1.491  
1.473  
1.455  
1.459  
1.441  
1.416  
1.377  
1.354  
1.248  
1.244  
1.228  
1.223  
1.218  
1.202  
1.197  
1.191  
1.000  
-0.982  
-0.963

| Parameter                | Value               |
|--------------------------|---------------------|
| 1 Origin                 | Bruker BioSpin GmbH |
| 2 Solvent                | CDCl3               |
| 3 Temperature            | 298.2               |
| 4 Number of Scans        | 2                   |
| 5 Spectrometer Frequency | 400.13              |
| 6 Nucleus                | 1H                  |

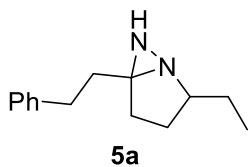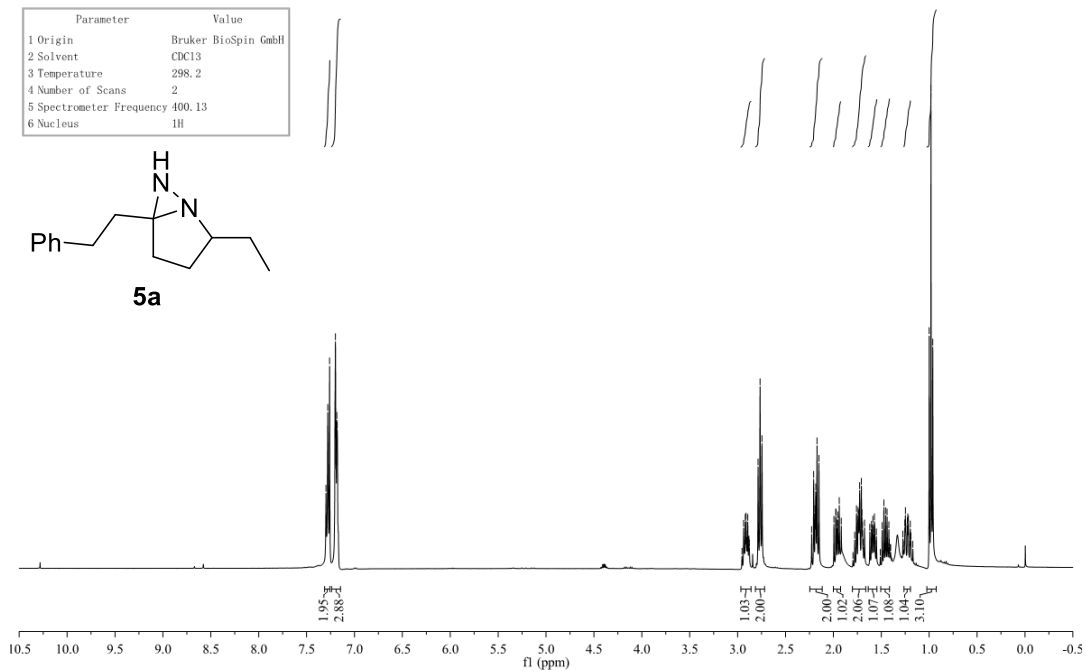

| Parameter                | Value               |
|--------------------------|---------------------|
| 1 Origin                 | Bruker BioSpin GmbH |
| 2 Solvent                | CDCl3               |
| 3 Temperature            | 298.2               |
| 4 Number of Scans        | 80                  |
| 5 Spectrometer Frequency | 100.62              |
| 6 Nucleus                | 13C                 |

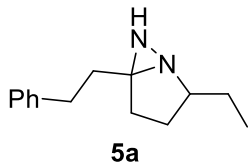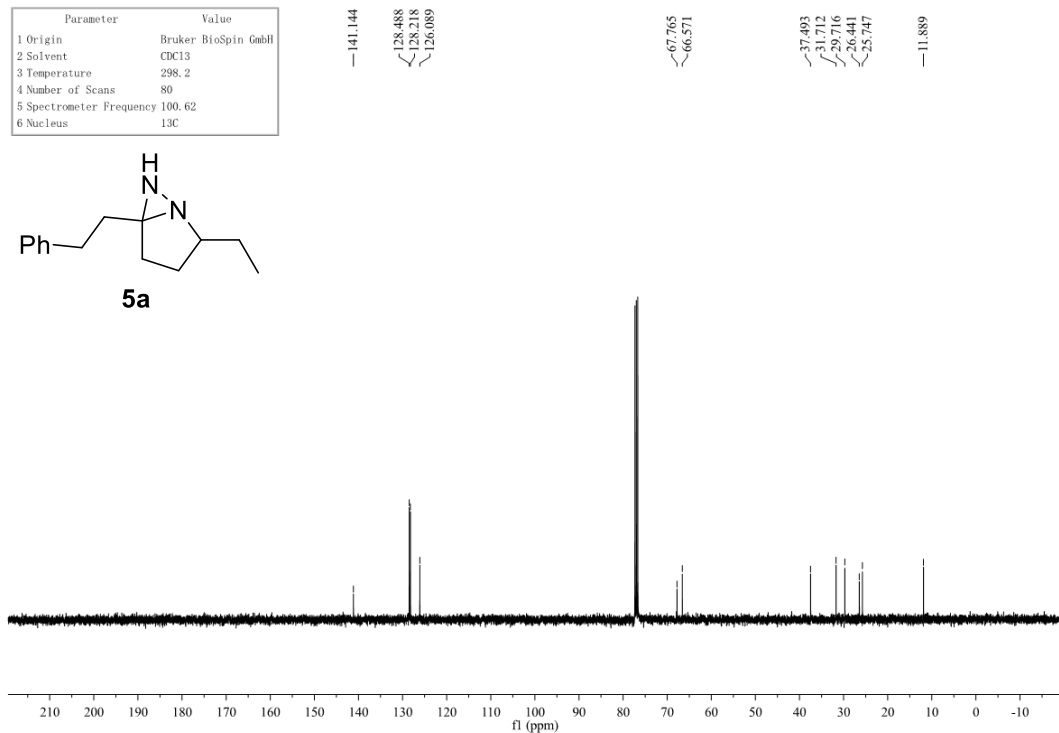

| Parameter                | Value               |
|--------------------------|---------------------|
| 1 Origin                 | Bruker BioSpin GmbH |
| 2 Solvent                | CDCl3               |
| 3 Temperature            | 298.2               |
| 4 Number of Scans        | 2                   |
| 5 Spectrometer Frequency | 400.13              |
| 6 Nucleus                | 1H                  |

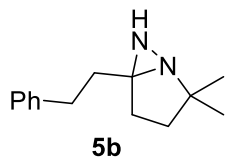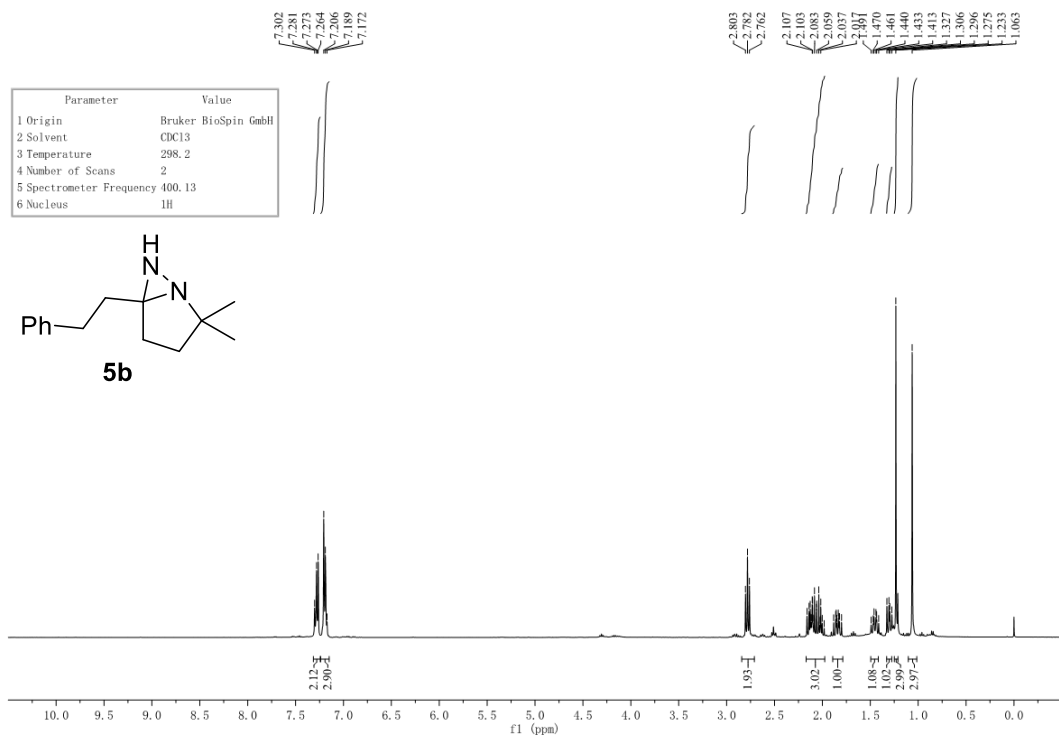

| Parameter                | Value               |
|--------------------------|---------------------|
| 1 Origin                 | Bruker BioSpin GmbH |
| 2 Solvent                | CDCl3               |
| 3 Temperature            | 298.1               |
| 4 Number of Scans        | 1024                |
| 5 Spectrometer Frequency | 100.61              |
| 6 Nucleus                | 13C                 |

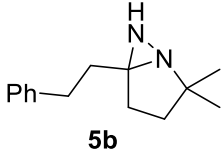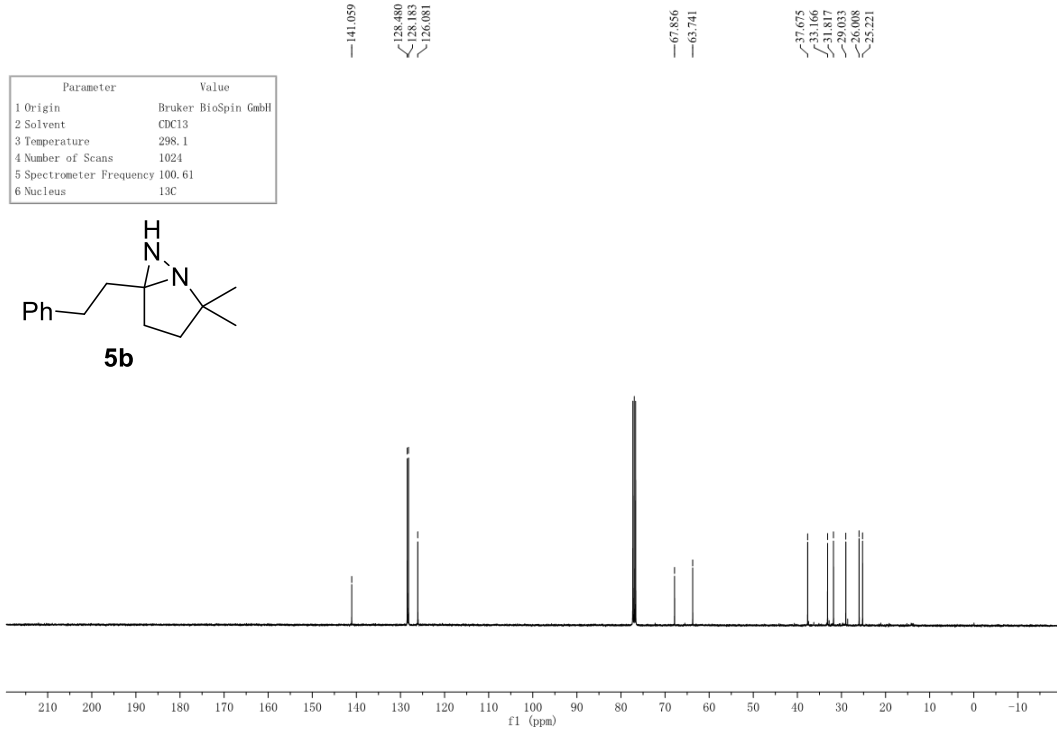

| Parameter                | Value               |
|--------------------------|---------------------|
| 1 Origin                 | Bruker BioSpin GmbH |
| 2 Solvent                | CDCl3               |
| 3 Temperature            | 298.2               |
| 4 Number of Scans        | 2                   |
| 5 Spectrometer Frequency | 400.13              |
| 6 Nucleus                | 1H                  |

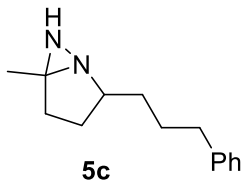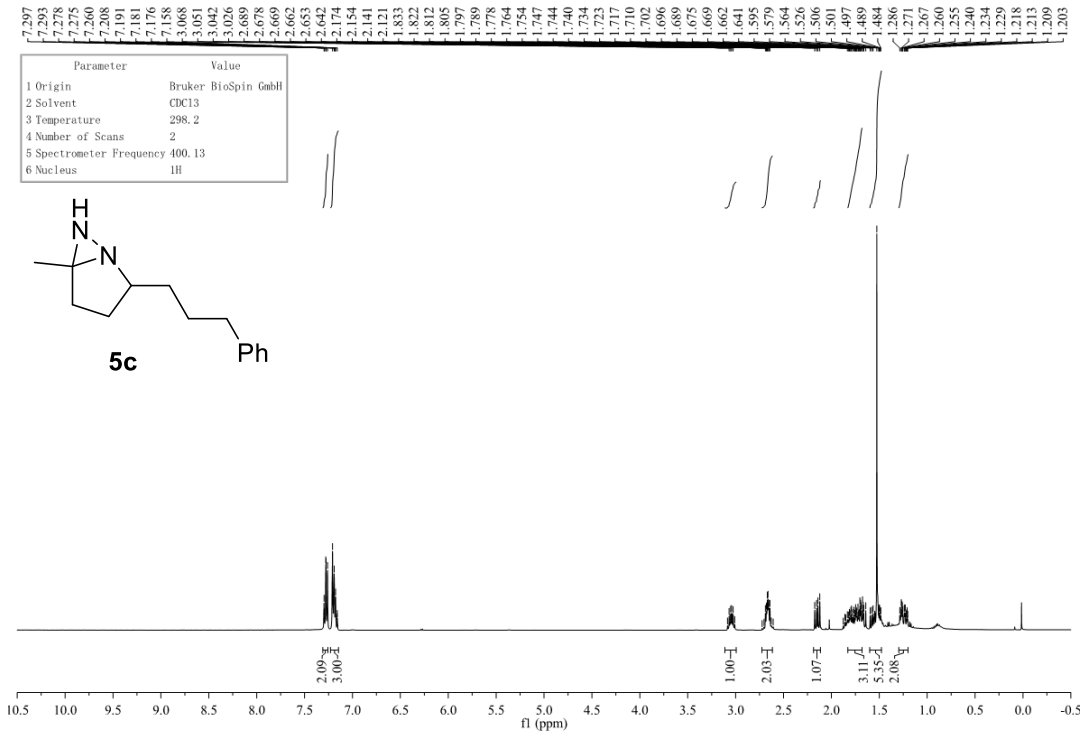

| Parameter                | Value               |
|--------------------------|---------------------|
| 1 Origin                 | Bruker BioSpin GmbH |
| 2 Solvent                | CDCl3               |
| 3 Temperature            | 298.1               |
| 4 Number of Scans        | 80                  |
| 5 Spectrometer Frequency | 100.62              |
| 6 Nucleus                | 13C                 |

142.503  
 128.385  
 128.186  
 125.580  
 65.002  
 64.912  
 36.062  
 32.346  
 31.719  
 29.238  
 26.979  
 21.564

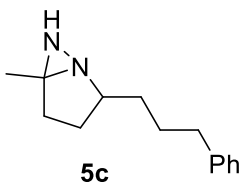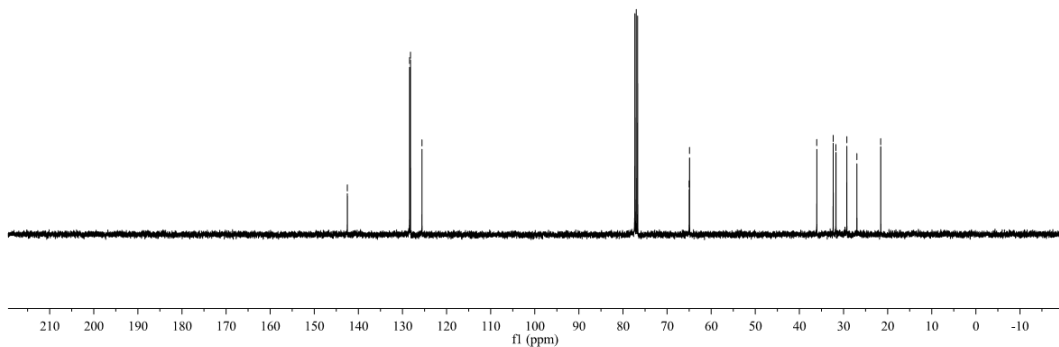

7.486  
 7.483  
 7.465  
 7.438  
 7.435  
 7.416  
 7.415  
 7.348  
 7.343  
 7.330  
 7.325  
 7.309  
 7.305  
 7.252  
 7.248  
 7.245  
 7.241  
 7.230  
 7.220  
 7.211  
 7.208  
 3.481  
 3.465  
 3.214  
 3.197  
 2.719  
 2.709  
 2.681  
 2.671  
 2.653  
 2.643  
 2.629  
 2.616  
 2.602  
 2.589  
 2.297  
 2.283  
 2.278  
 2.198  
 2.192  
 2.179  
 2.171  
 2.160  
 2.132  
 2.118  
 2.109  
 2.091  
 2.015  
 2.000  
 1.987  
 1.984  
 1.968  
 1.826  
 1.808  
 1.795  
 1.775  
 1.726  
 1.423  
 1.418  
 1.409  
 1.397  
 1.386  
 1.377  
 1.373  
 1.366  
 1.346  
 1.201  
 1.185  
 1.169

| Parameter                | Value               |
|--------------------------|---------------------|
| 1 Origin                 | Bruker BioSpin GmbH |
| 2 Solvent                | CDCl3               |
| 3 Temperature            | 297.1               |
| 4 Number of Scans        | 2                   |
| 5 Spectrometer Frequency | 400.15              |
| 6 Nucleus                | 1H                  |

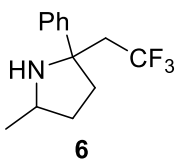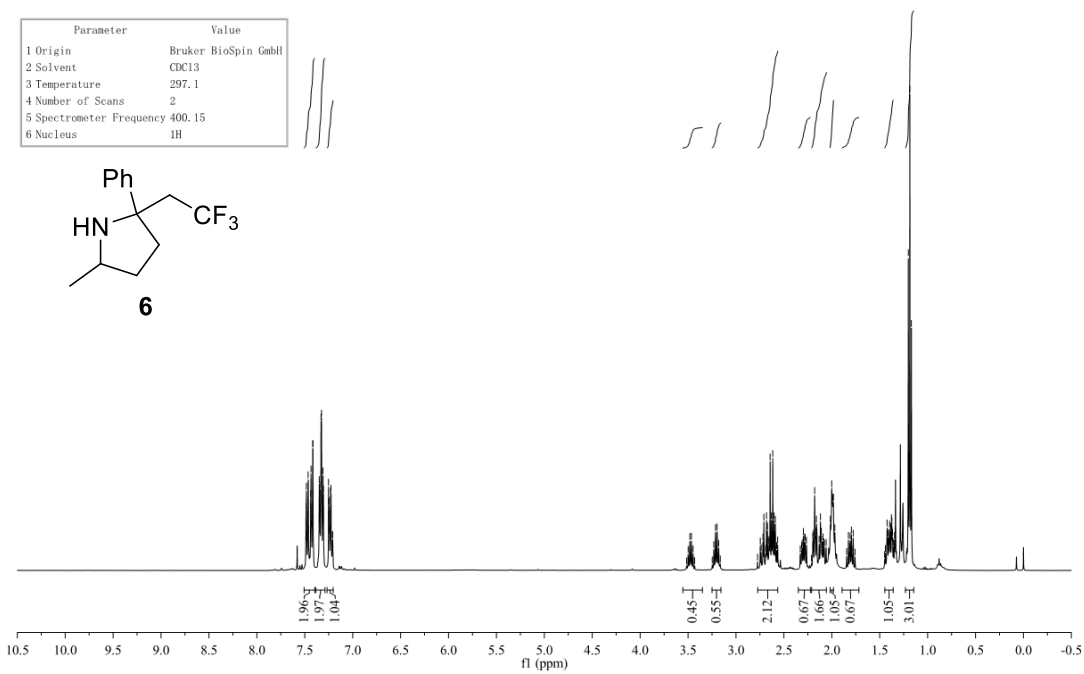

| Parameter                | Value               |
|--------------------------|---------------------|
| 1 Origin                 | Bruker BioSpin GmbH |
| 2 Solvent                | CDCl3               |
| 3 Temperature            | 297.6               |
| 4 Number of Scans        | 1024                |
| 5 Spectrometer Frequency | 100.62              |
| 6 Nucleus                | 13C                 |

146.371  
145.130  
130.072  
130.047  
128.218  
128.058  
127.301  
127.279  
126.680  
126.635  
125.884  
125.729  
124.533  
124.509  
121.763  
121.739

64.091  
64.078  
64.012  
64.898  
52.097  
52.535  
47.039  
46.777  
44.405  
39.352  
38.997  
32.503  
32.288  
22.214

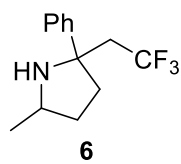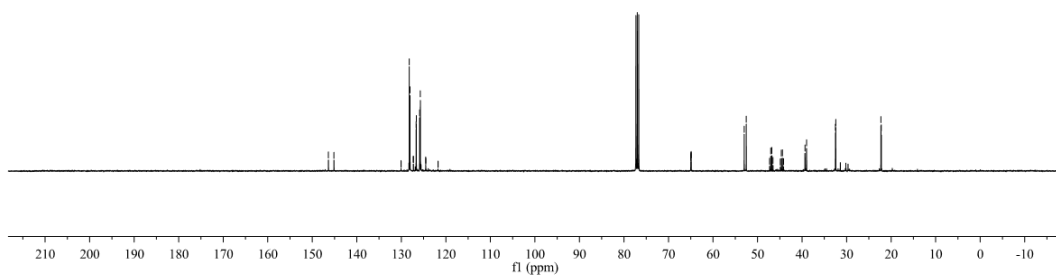

| Parameter                | Value               |
|--------------------------|---------------------|
| 1 Origin                 | Bruker BioSpin GmbH |
| 2 Solvent                | CDCl3               |
| 3 Temperature            | 297.1               |
| 4 Number of Scans        | 2                   |
| 5 Spectrometer Frequency | 376.52              |
| 6 Nucleus                | 19F                 |

60.227  
60.275

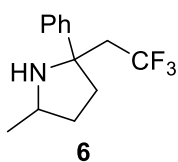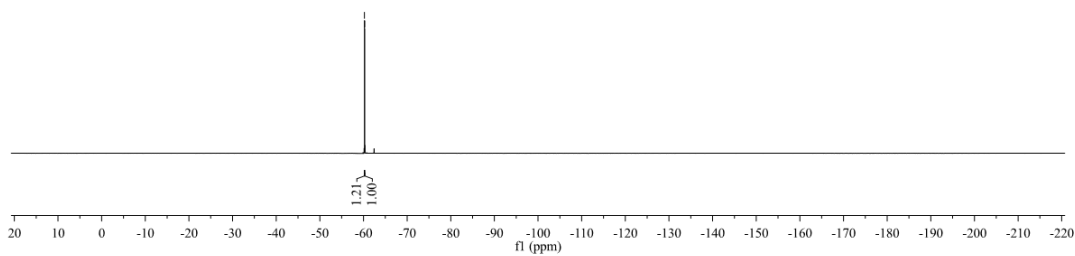

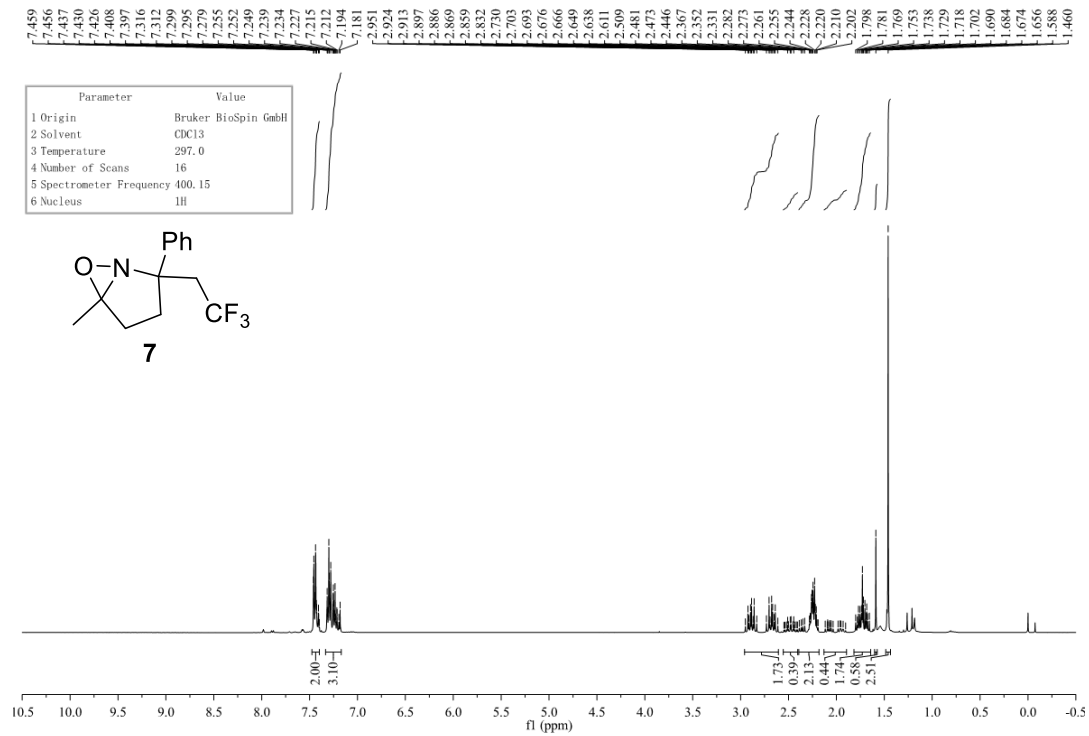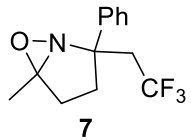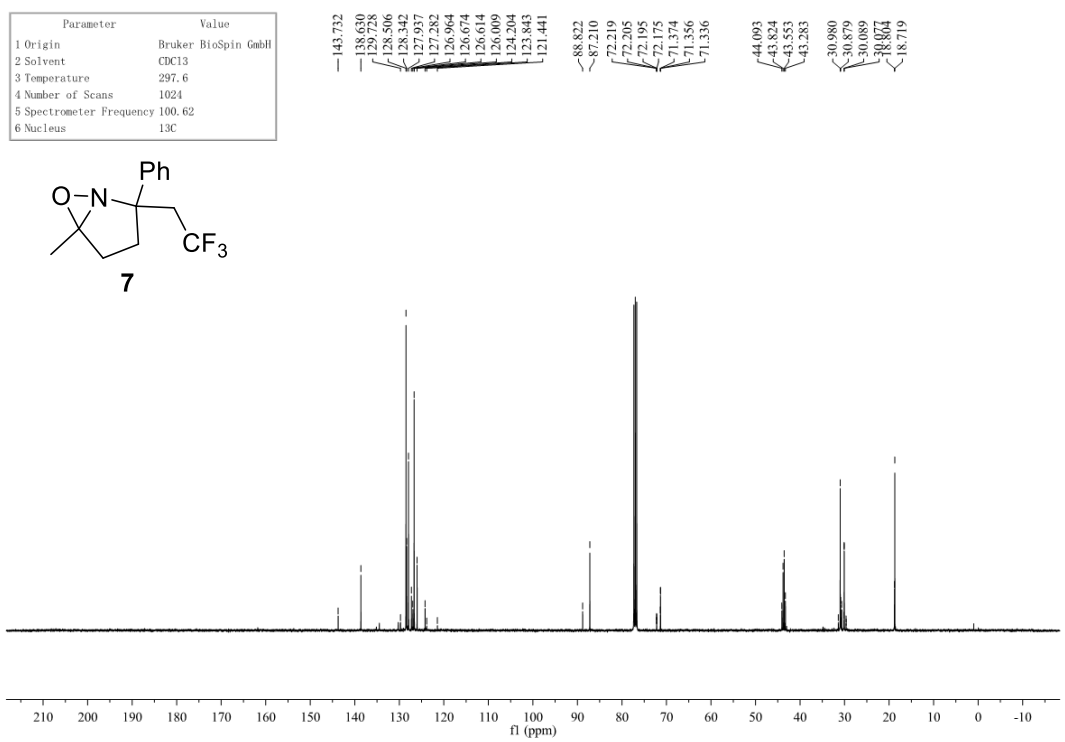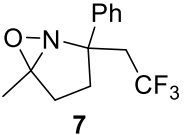

| Parameter                | Value               |
|--------------------------|---------------------|
| 1 Origin                 | Bruker BioSpin GmbH |
| 2 Solvent                | CDCl3               |
| 3 Temperature            | 297.1               |
| 4 Number of Scans        | 16                  |
| 5 Spectrometer Frequency | 376.52              |
| 6 Nucleus                | 19F                 |

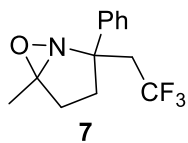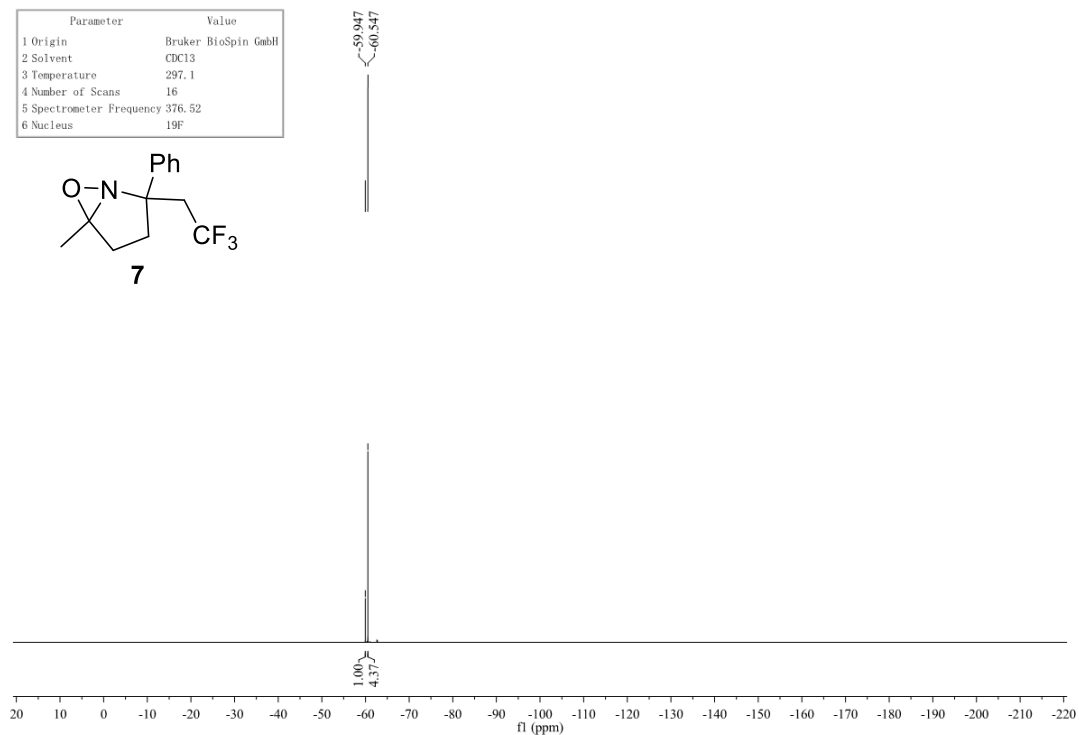

7.702  
7.699  
7.695  
7.688  
7.683  
7.678  
7.477  
7.476  
7.469  
7.464  
7.460  
7.455  
7.451  
7.443  
7.440  
7.437  
7.431  
7.415  
7.396  
7.376  
7.262  
7.258  
7.254  
7.216  
7.198  
7.188  
7.183  
3.817  
2.870  
2.865  
2.854  
2.847  
2.839  
2.839  
2.827  
2.477  
2.450  
2.403  
2.388  
2.384  
2.372  
2.368  
2.353  
2.295  
2.270  
2.245  
2.233  
2.216  
2.211  
2.208  
2.199  
2.196  
2.185  
2.181  
2.166  
2.162  
2.152  
2.152  
2.134  
2.098  
2.079  
2.075  
2.063  
2.056  
2.048  
2.037  
2.021  
1.871  
1.855

| Parameter                | Value               |
|--------------------------|---------------------|
| 1 Origin                 | Bruker BioSpin GmbH |
| 2 Solvent                | CDCl3               |
| 3 Temperature            | 296.1               |
| 4 Number of Scans        | 2                   |
| 5 Spectrometer Frequency | 400.15              |
| 6 Nucleus                | 1H                  |

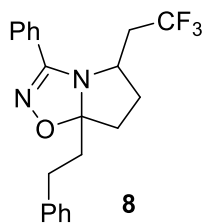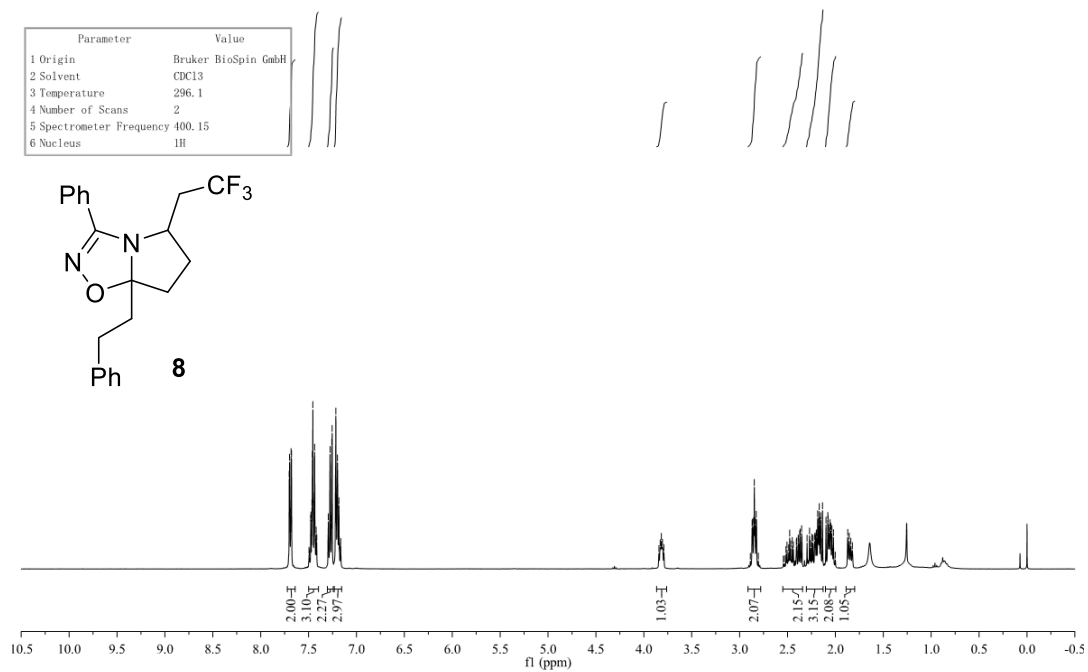



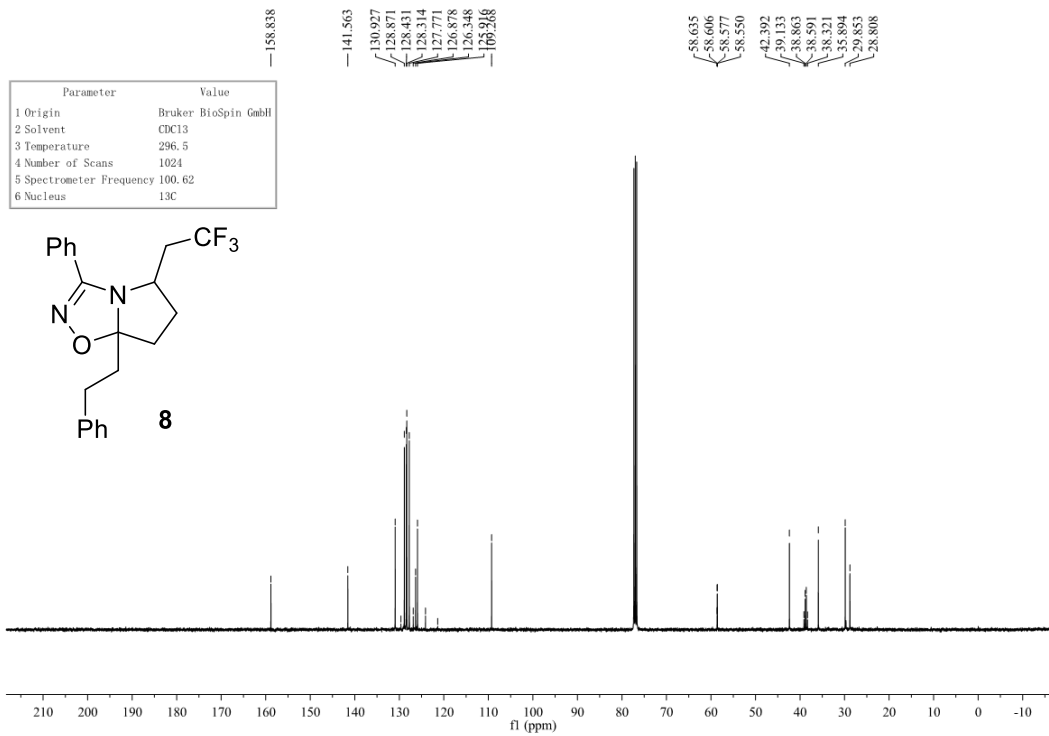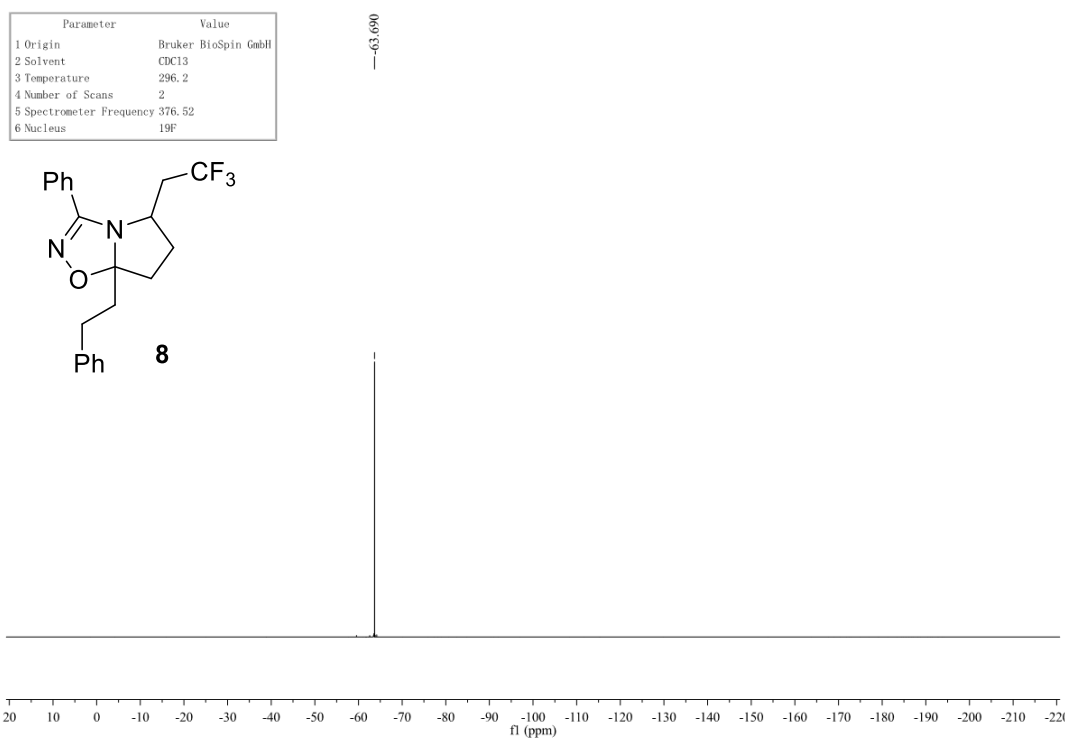

7.438  
7.419  
7.408  
7.260  
7.241  
7.222  
7.177  
7.163  
7.145  
7.127  
5.800  
5.782  
5.775  
5.763  
5.757  
5.739  
5.732  
5.714  
5.714  
5.696  
5.663  
5.087  
4.941  
4.920  
4.915  
4.895  
4.891  
4.852  
4.848  
2.623  
2.613  
2.596  
2.586  
2.575  
2.568  
2.558  
2.548  
2.530  
2.520  
2.503  
2.492  
2.475  
2.470  
2.465  
2.291  
2.274  
2.258  
2.241  
2.224  
2.183  
2.165  
2.148  
2.134  
2.114  
1.987  
1.969  
1.739  
1.721  
1.707  
1.690  
1.617  
1.599  
1.581  
1.482  
1.464  
1.451  
1.150  
0.968

| Parameter                | Value               |
|--------------------------|---------------------|
| 1 Origin                 | Bruker BioSpin GmbH |
| 2 Solvent                | CDCl3               |
| 3 Temperature            | 296.1               |
| 4 Number of Scans        | 2                   |
| 5 Spectrometer Frequency | 400.15              |
| 6 Nucleus                | 1H                  |

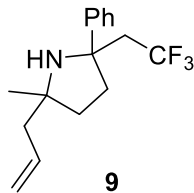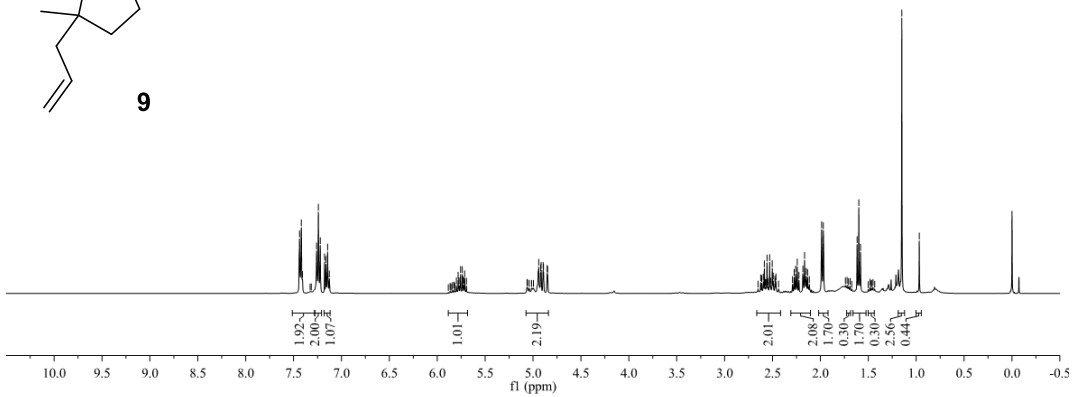

| Parameter                | Value               |
|--------------------------|---------------------|
| 1 Origin                 | Bruker BioSpin GmbH |
| 2 Solvent                | CDCl3               |
| 3 Temperature            | 296.8               |
| 4 Number of Scans        | 1024                |
| 5 Spectrometer Frequency | 100.62              |
| 6 Nucleus                | 13C                 |

146.843  
146.785  
135.576  
135.144  
129.973  
127.964  
127.203  
126.527  
125.912  
124.452  
121.661  
117.866  
117.283

64.938  
64.927  
61.597  
48.309  
47.916  
47.233  
46.988  
38.385  
37.693  
28.877  
28.829

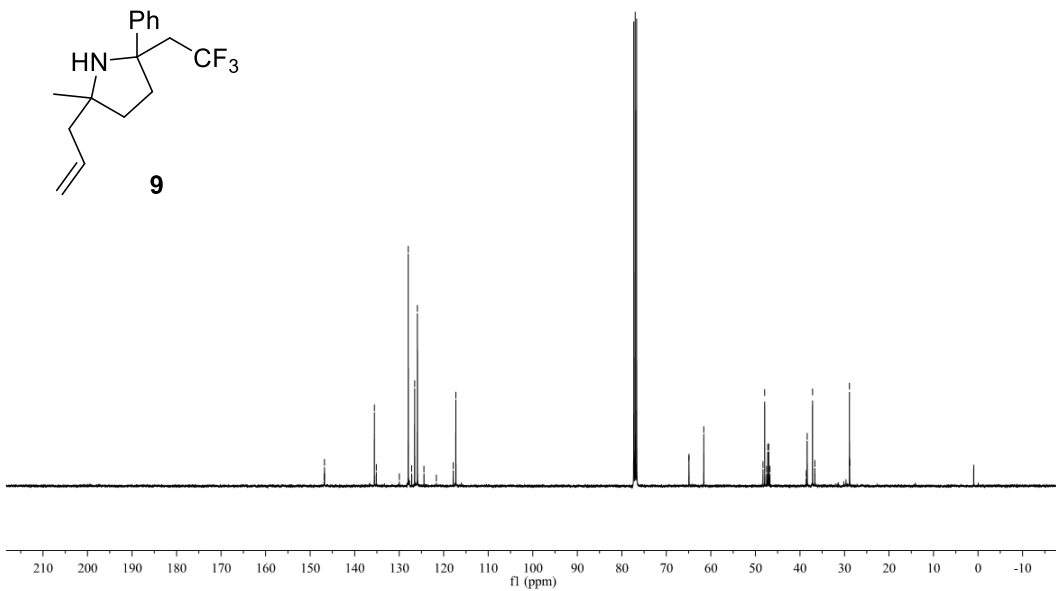

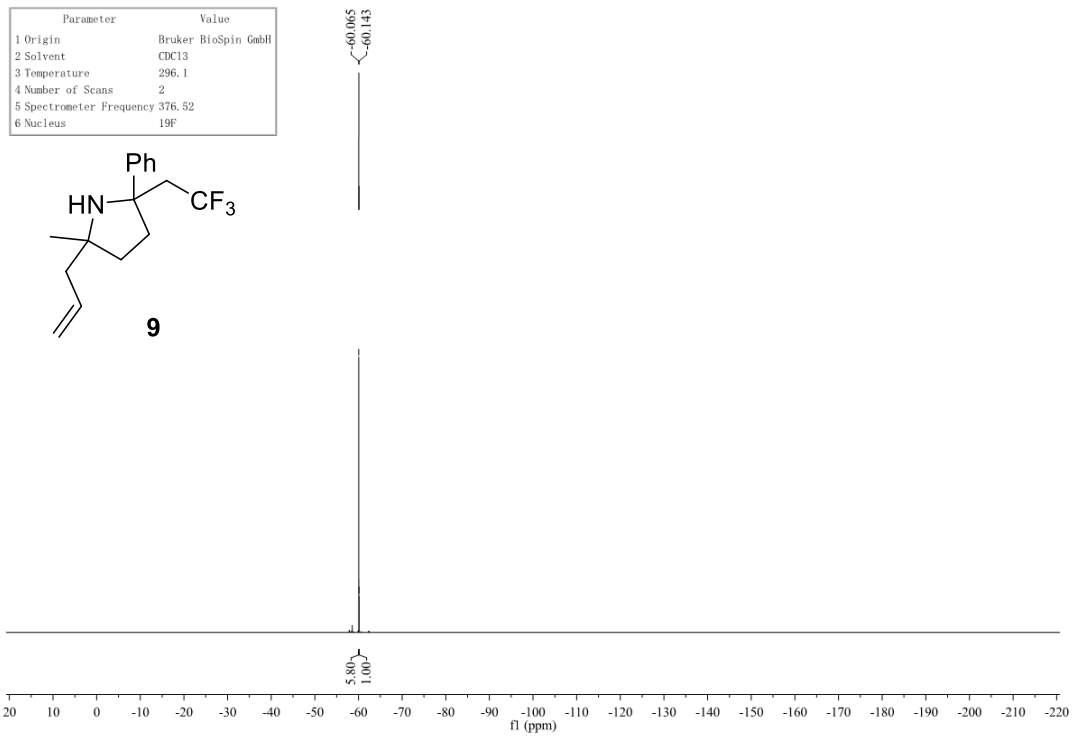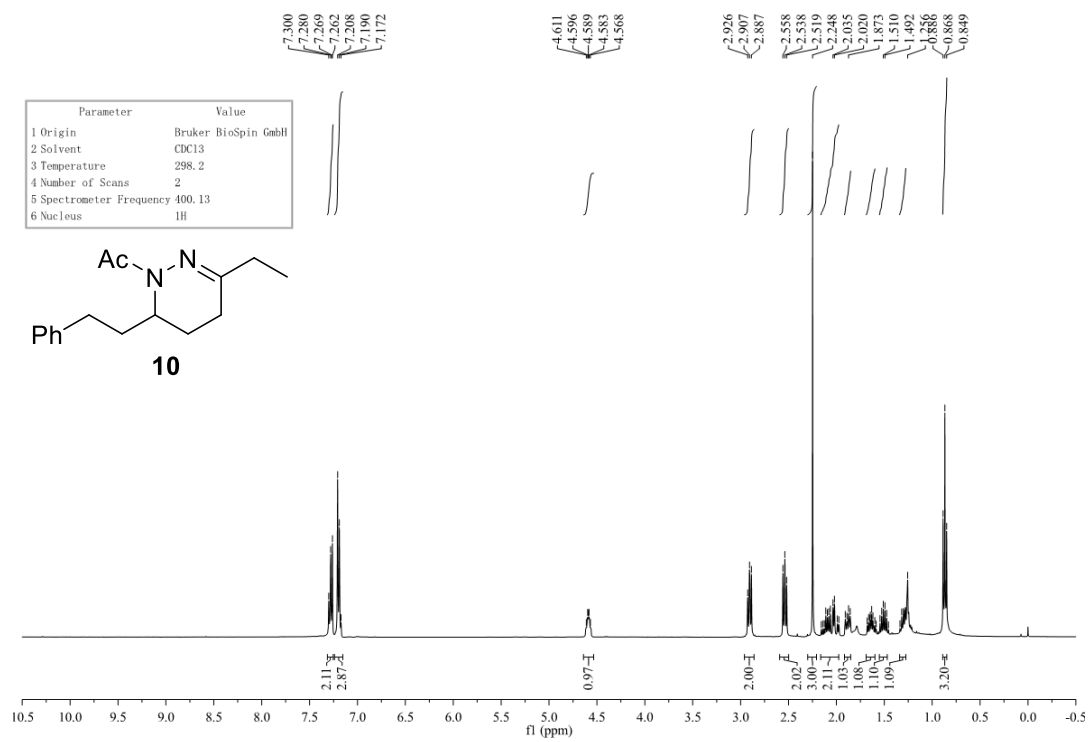

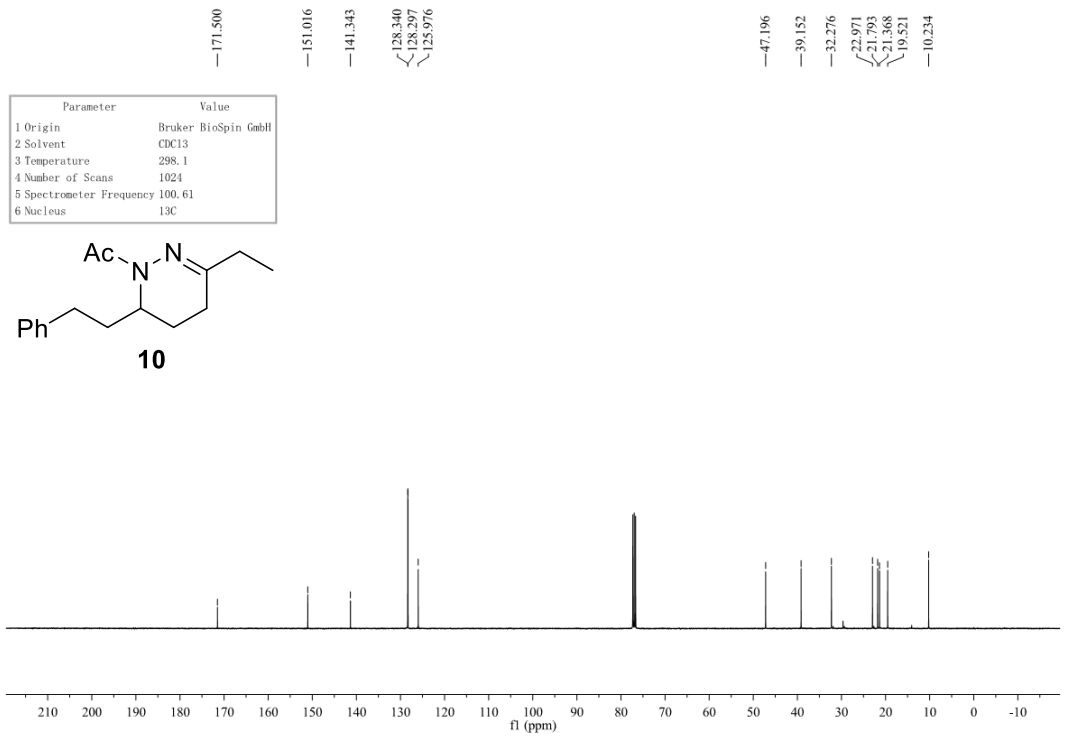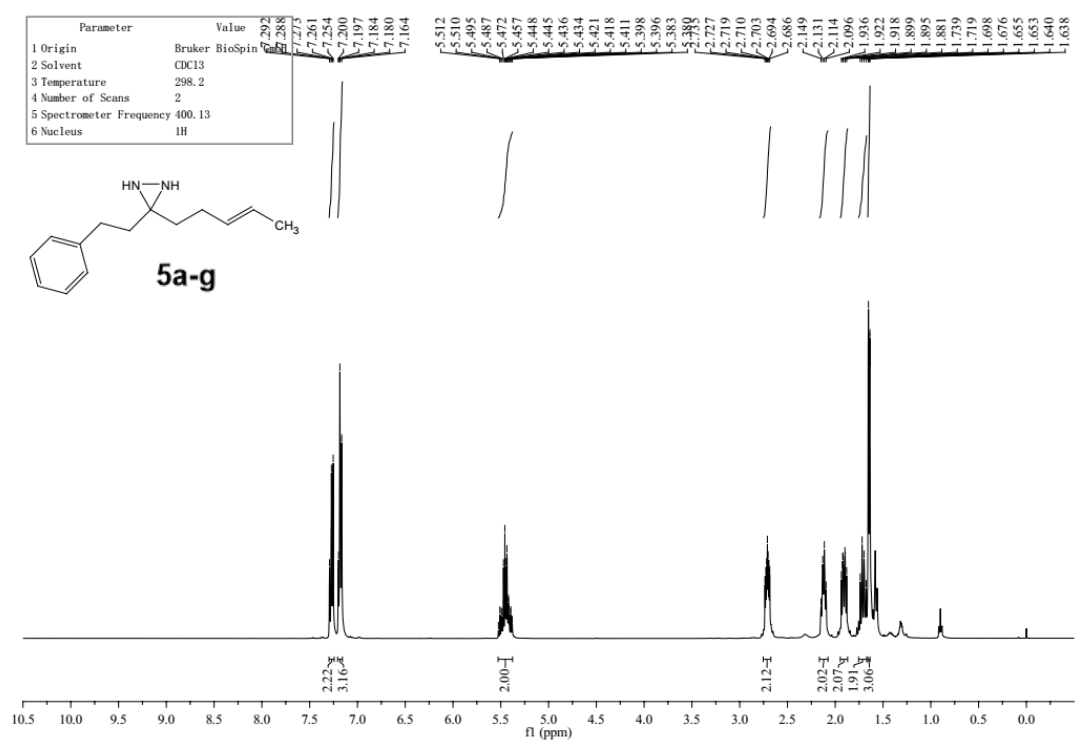

| Parameter                | Value               |
|--------------------------|---------------------|
| 1 Origin                 | Bruker BioSpin GmbH |
| 2 Solvent                | CDCl3               |
| 3 Temperature            | 297.2               |
| 4 Number of Scans        | 80                  |
| 5 Spectrometer Frequency | 100.61              |
| 6 Nucleus                | 13C                 |

141.081  
 129.904  
 128.461  
 128.142  
 126.961  
 125.870

57.301

38.073  
 36.020  
 30.938

27.762  
 17.839

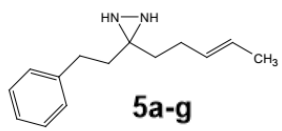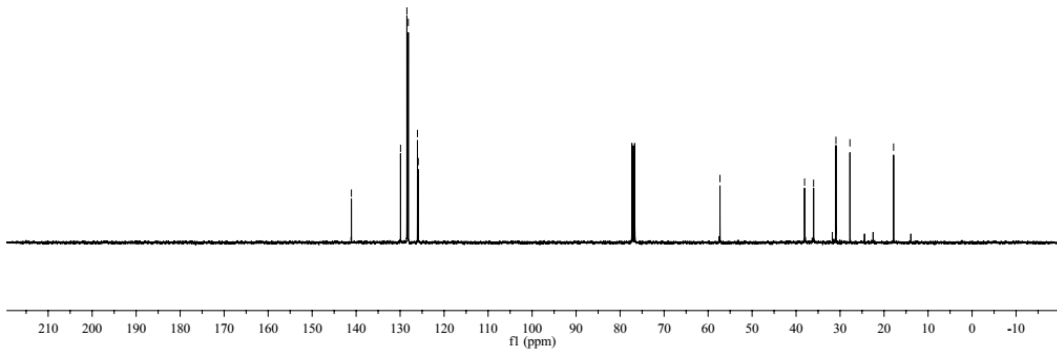

Supplement: d3sc04886a1.pdf [file d3sc04886a1.pdf]
